# Supplementary material for: Silacarboxylic acid-mediated photoredox Z-stereoselective fluoroalkylation of alkynes
Source: Royal Society of Chemistry journal article supplement (doi:10.1039/d4qo00687a), 2024-01-01

# Supporting Information

## Silacarboxylic Acid Mediated Photoredox Z-Stereoselective

### Fluoroalkylation of Alkynes

Chunhui Yang,<sup>†a</sup> Zhifeng Ma,<sup>†a</sup> Hengyuan Zhao,<sup>a</sup> Zhi Li,<sup>a</sup> Guokai Li,<sup>a</sup> Jingchao Chen,<sup>\*a,b</sup> and Baomin Fan<sup>\*a,b</sup>

a Yunnan Key Laboratory of Chiral Functional Substance Research and Application, Yunnan Minzu University, Yuehua Street, Kunming 650504, China.

E-mail: chenjingchao84@163.com (J. Chen); adams.bmf@hotmail.com (B.-M. Fan)

b Key Laboratory of Chemistry in Ethnic Medicinal Resources, Yunnan Minzu University, Yuehua Street, Kunming, 650500, China.

† These authors contributed equally to this work.

### List of Contents

|                                                                               |            |
|-------------------------------------------------------------------------------|------------|
| <b>1. General Information.....</b>                                            | <b>S2</b>  |
| <b>1.1 Reagents and instruments.....</b>                                      | <b>S2</b>  |
| <b>1.2 Computational methods.....</b>                                         | <b>S2</b>  |
| <b>2. General procedure.....</b>                                              | <b>S3</b>  |
| <b>2.1 General procedure for preparation of fluoroalkylated products.....</b> | <b>S3</b>  |
| <b>2.2 Procedure for preparation of other reagents.....</b>                   | <b>S3</b>  |
| <b>3. Optimization of reaction conditions.....</b>                            | <b>S8</b>  |
| <b>4. Mechanistic studies.....</b>                                            | <b>S8</b>  |
| <b>4.1 Radical trapping experiments.....</b>                                  | <b>S8</b>  |
| <b>4.2 H/D exchange and KIE experiments.....</b>                              | <b>S9</b>  |
| <b>4.3 Fluorescence quenching experiments.....</b>                            | <b>S10</b> |
| <b>4.4 Cyclic voltammetry measurements.....</b>                               | <b>S10</b> |
| <b>4.5 Density Functional Theory Calculation and Atomic Coordination.....</b> | <b>S11</b> |
| <b>4.6 Determination of the Quantum Yield.....</b>                            | <b>S22</b> |
| <b>5. Characterization data of all products.....</b>                          | <b>S24</b> |
| <b>6. References.....</b>                                                     | <b>S46</b> |
| <b>7. Copies of NMR spectra of all products .....</b>                         | <b>S48</b> |

## 1. General Information

### 1.1 Reagents and instruments

Unless otherwise noted, all commercial reagents were purchased from Shanghai Haohong Scientific Co. Ltd. The material of the irradiation vessel is borosilicate glass (Chongqing Synthware Glass, China). All solvents used in the reactions were purified prior to use following the Solvent Purification Systems (FLEANO, FL-MD-7), extra dry 2-Methyltetrahydrofuran (2-Me-THF) (Water $\leq$ 50 ppm) was purchased from Energy Chemical Ltd. 4CzIPN was prepared using literature procedures<sup>[1]</sup>. All reactions and manipulations which are sensitive to moisture or air were performed in an argon-filled glovebox (MIKROUNA Super/1220/750) or using standard Schlenk techniques. The light source was 20 W blue LEDs (454 nm, 1 W\*20, 30-50 cd/m<sup>2</sup>, made in Everlight Electronics., Ltd.). Organic solutions were concentrated under reduced pressure on an EYELA rotary evaporator (N-1100) using a water bath. Steady-state emission spectra were recorded using a Cary Eclipse Fluorescence Spectrophotometer (Agilent Technologies). Column chromatography was performed with silica gel (200-300 mesh) with petroleum ether and ethyl acetate as eluents. Thin-layer chromatography (TLC) was performed on Supelco 0.25 mm silica gel 60 F<sub>254</sub> plates. Visualization of the developed chromatogram was performed by Phosphomolybdic Acid or KMnO<sub>4</sub> chromogenic agent stain. <sup>1</sup>H NMR spectra were recorded using a Bruker 400 MHz instrument with tetramethylsilane (TMS) as an internal standard. <sup>13</sup>C NMR spectra were obtained at 101 MHz and referenced to the internal solvent signals. <sup>19</sup>F NMR spectra were obtained at 376 MHz. High resolution mass spectra (HRMS) were performed on a VG Autospec-3000 spectrometer. High Resolution Mass Spectra were obtained from the Yunnan Minzu University Mass Spectral Facility. HPLC analysis was performed on an Agilent 1260 Infinity LC chromatography.

### 1.2 Computational methods

All density functional theory (DFT) calculations were performed to understand the reaction mechanism of the photocatalyzed stereoselective monofluoroalkylation of alkynes by halogen-atom transfer: highly selective fluoroalkylation obtained by light induced difluoroalkylation of alkynes. B3LYP-D3<sup>[2]</sup> method combined with a basis set of Def2-SVP<sup>[3]</sup> for all atoms was used to fully optimize all structures in the gas-phase. Then, vibrational frequency calculations on these optimized geometries were carried out at the same level of theory to confirm no imaginary frequency for all local minimum and one appropriate imaginary frequency for each transition state. Single-point energy calculations on the critical structures by using B3LYP-D3 with highly accurate basis set Def2-TZVP<sup>[4]</sup> in THF solution (SMD solvent model). All DFT calculations were carried out by Gaussian16 program<sup>[5]</sup>. All 3D images of the optimized structures were shown by CYL view.<sup>[6]</sup>

## 2. General procedure

### 2.1. General procedure for preparation of fluoroalkylated products.

#### General Procedure A: Visible-light-induced catalytic fluoroalkylation reaction of alkynes

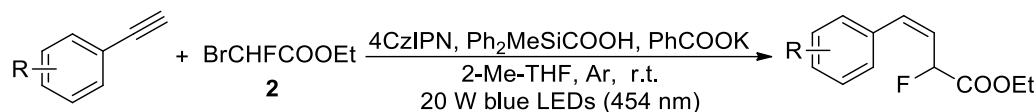

4CzIPN (7.9 mg, 0.01 mmol, 0.05 equiv.), anhydrous potassium benzoate (89.7 mg, 0.4 mmol, 2 equiv.), methyldiphenylsilanecarboxylic acid (72.6 mg, 0.3 mmol, 1.5 equiv.), phenylacetylene (20.4 mg, 0.2 mmol, 1 equiv.), ethyl bromofluoroacetate (81.2 mg, 0.4 mmol, 2 equiv.) and 2-Me-THF (2 mL) were added to a Schlenk tube under argon atmosphere. The resulting mixture was stirred under the irradiation of 20 W blue LEDs (454 nm) at room temperature. After the reaction was completed (as monitored by TLC analysis), the solvent was removed under reduced pressure and the residue was purified by column chromatography (PE/EA = 80:1) to afford the fluoroalkylation products.

#### General Procedure B: Visible-light-induced catalytic difluoroalkylation reaction of alkynes

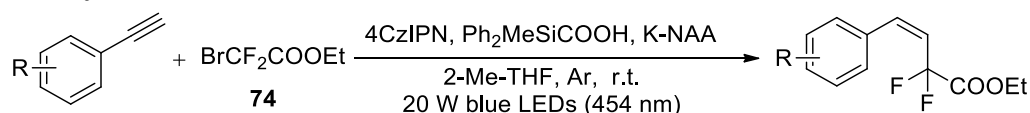

To an oven dried 15 mL Schlenk-tube equipped with a stir bar was added photocatalyst 4CzIPN (6.1 mg, 0.008 mmol, 0.04 equiv.), 1-naphthaleneacetic acid potassium salt (K-NAA) (89.7 mg, 0.4 mmol, 2 equiv.), methyldiphenyl silanecarboxylic acid (72.6 mg, 0.3 mmol, 1.5 equiv.), phenylacetylene (20.4 mg, 0.2 mmol, 1 equiv.), ethyl bromodifluoroacetate (74.0 mg, 0.4 mmol, 2 equiv.) and 2-Me-THF (2 mL) under argon atmosphere. The reaction mixture was stirred under the irradiation of 20 W blue LEDs (454 nm) at room temperature. After the reaction was completed (as monitored by TLC analysis), the solvent was removed under reduced pressure and the residue was purified by column chromatography (PE/EA = 80:1) to afford the fluoroalkylation products.

### 2.2. Procedure for preparation of other reagents

#### General Procedure E: General procedure of the preparation of silicarboxylic acids

Silicarboxylic acids were synthesized according to reported procedure<sup>[7]</sup>. Small pieces of lithium (1.26 g, 180 mmol, 3 equiv.) were added to dry THF (100 mL) under argon. Chlorosilane (60 mmol, 1 equiv.) was then added dropwise *via* gas-tight syringe and the reaction mixture was stirred for 5 h. The resulting black solution was transferred *via* cannula into a flame-dried flask charged with argon and cooled to  $-78\text{ }^\circ\text{C}$ .  $\text{CO}_2$  gas was then bubbled into the solution of silyllithium for 20 min before cold bath was removed. After the reaction mixture was warmed to room temperature, it was slowly poured into a separation funnel with aqueous HCl (30 mL, 1 mol/L) and  $\text{CH}_2\text{Cl}_2$  (25 mL). The aqueous phase was further extracted with  $\text{CH}_2\text{Cl}_2$  (2×25 mL). The combined

organic phase was dried over MgSO<sub>4</sub>, filtered and concentrated in vacuo to give a brown solid. Recrystallization of the crude product in hexane/CH<sub>2</sub>Cl<sub>2</sub> provide corresponding silacarboxylic acids as colorless crystal.

**General Procedure F: General procedure of the preparation of  $\alpha$ -oxy bromides:**  $\alpha$ -oxy bromides were synthesized according to reported procedure<sup>[8]</sup>. Following the addition of a magnetic stir bar, ZnCl<sub>2</sub> (0.05 equiv.), CH<sub>2</sub>Cl<sub>2</sub> and acyl bromide (1.2 equiv.) were added to an oven-dried round-bottom flask that had been charged with nitrogen atmosphere. The resulting solution was cooled to -10 °C and the mixture was stirred for 10 min. The aldehyde (1.0 equiv.) was added dropwise using a syringe at this temperature, and the resulting mixture was agitated for two hours. The reaction mixture was then rinsed with CH<sub>2</sub>Cl<sub>2</sub> and filtered through a brief column of neutral aluminum oxide. Reduced pressure was used to concentrate the filtrate. After its purity was determined, the product was either vacuum-distilled to remove impurities or used right away.

**General Procedure G: General procedure of the preparation of trifluoromethyl alkene**

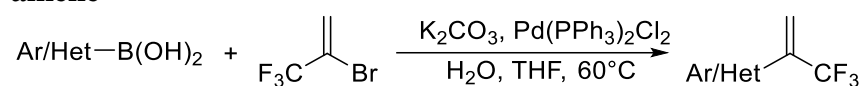

According to literature reports<sup>[9]</sup>, to a Schlenk tube equipped with stir bar, arylboronic acid (1.0 equiv., 3 mmol) and Pd(PPh<sub>3</sub>)<sub>2</sub>Cl<sub>2</sub> (3 mol%, 63.2 mg) were added. The vessel was evacuated and filled with N<sub>2</sub> (three times), and then aqueous K<sub>2</sub>CO<sub>3</sub> (2.0 M, 6 mL) and THF (9 mL) were added. After addition of 2-bromo-3,3,3-trifluoro-1-propene (1.5 equiv., 4.5 mmol, 0.47 mL), the solution was stirred at 60°C with heating mantle for 12 hours (TLC tracking detection). The solvent was removed under reduced pressure and the residue was purified by column chromatography (PE - PE/EA) to afford the corresponding trifluoromethyl alkene.

**General Procedure H: General procedure of the preparation of drug derived alkynes 38-41 & 43**

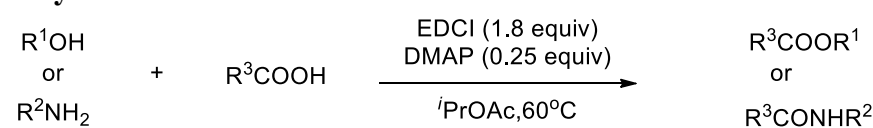

**Drug derived alkynes (38-41,43)** were synthesized according to reported procedure<sup>[10]</sup>. Following the addition of a magnetic stir bar, corresponding alcohol (1.0 equiv), corresponding acid (1.5 equiv), EDC-HCl (1.8 equiv), DMAP (0.25 equiv), and tPrOAc (0.25 M for alcohol) were added to an oven-dried round-bottom flask that had been charged with nitrogen atmosphere. The mixture was stirred at 60 °C overnight until the completion of the reaction as monitored by TLC. The solvent was removed under reduced pressure and the residue was purified by column chromatography (PE - PE/EA) to afford the corresponding alkyne.

**General Procedure I: General procedure of the preparation of drug derived alkynes 42**

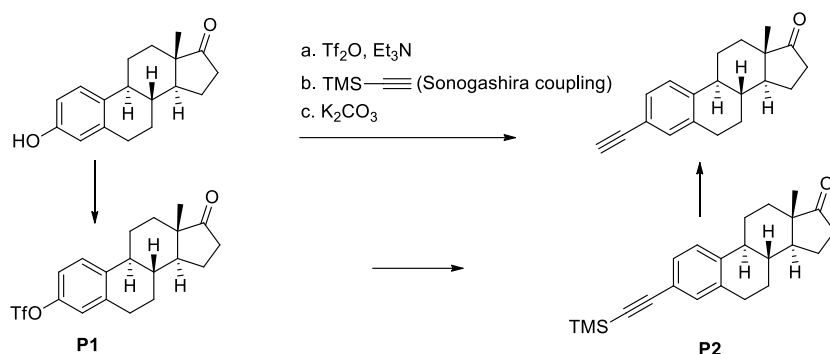

**Drug derived alkyne (42)** were synthesized according to reported procedure<sup>[11]</sup>. After adding a magnetic stirring rod, dry  $\text{CH}_2\text{Cl}_2$  (2M), estrone (1.0 equiv), triethylamine (2 equiv mmol) and trifluoromethanesulfonic anhydride (2 equiv) were added at  $0^\circ\text{C}$  to a heated and dried round-bottom flask and filled with nitrogen. The reaction mixture was stirred at  $0^\circ\text{C}$  for 20 min before the addition of water. The phases were separated and the aqueous phase was extracted with  $\text{CH}_2\text{Cl}_2$  ( $2 \times 20$  mL). The combined organic phases are washed with brine and dried over  $\text{Na}_2\text{SO}_4$ . The filtrate was concentrated in vacuo and the residue was purified by flash column chromatography to afford **P1** in 80% yield.

To a mixture of **P1** (1.0 equiv),  $\text{Pd}(\text{PPh}_3)_2\text{Cl}_2$  (0.1 equiv) and  $\text{CuI}$  (0.1 equiv) in DMF (0.05M) was added  $\text{Et}_3\text{N}$  (3.0 equiv), and TMSA (5.0 equiv), then the reaction was stirred at  $80^\circ\text{C}$  for 4 h. Monitored by TLC, when the reaction was completed, the mixture was quenched with water and extracted with EtOAc (50 mL x 3). The combined organic phases are washed with brine and dried over  $\text{Na}_2\text{SO}_4$ . The filtrate was concentrated in vacuo and the residue was purified by flash column chromatography to afford **P2** 50% yield. To **P2** (1.0 equiv) in MeOH (0.1M) was added  $\text{K}_2\text{CO}_3$  (2.0 equiv). The reaction mixture was stirred at  $25^\circ\text{C}$  for 4 h. Monitored by TLC, when the reaction was completed, the mixture was quenched with water and extracted with EtOAc (20 mL x 3). The combined organic phases are washed with brine and dried over  $\text{Na}_2\text{SO}_4$ . The filtrate was concentrated in vacuo and the residue was purified by flash column chromatography to afford drug molecules alkyne in 90% yield.

### 3. Optimization of reaction conditions

Table S1. Optimization of reaction conditions (1).<sup>[a]</sup>

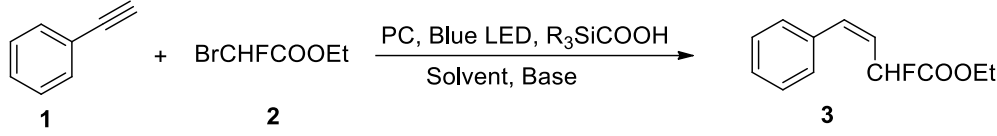

| Entry | SilaCOgen           | PC     | Base                                          | Solvent         | Z (%) | Yield (%) <sup>[c]</sup> |
|-------|---------------------|--------|-----------------------------------------------|-----------------|-------|--------------------------|
| 1     | Et <sub>3</sub> SiH | 4CzIPN | NaOAc                                         | 1,4-dioxane     | /     | ND                       |
| 2     | /                   | 4CzIPN | NaOAc                                         | 1,4-dioxane     | /     | trace                    |
| 3     | SA1                 | 4CzIPN | NaOAc                                         | 1,4-dioxane     | 89    | 28                       |
| 4     | SA1                 | 4CzIPN | NaOAc                                         | acetone         | 60    | 20                       |
| 5     | SA1                 | 4CzIPN | NaOAc                                         | toluene         | 95    | 6                        |
| 6     | SA1                 | 4CzIPN | NaOAc                                         | MeOH            | 77    | 17                       |
| 7     | SA1                 | 4CzIPN | NaOAc                                         | EtOAc           | 77    | 15                       |
| 8     | SA1                 | 4CzIPN | NaOAc                                         | dichloromethane | 80    | 3                        |
| 9     | SA1                 | 4CzIPN | NaOAc                                         | MeCN            | 76    | 7                        |
| 10    | SA1                 | 4CzIPN | NaOAc                                         | THF             | 90    | 47                       |
| 11    | SA1                 | 4CzIPN | NaOAc                                         | MeTHF           | 93    | 76                       |
| 12    | SA1                 | 4CzIPN | /                                             | MeTHF           | 67    | 16                       |
| 13    | SA1                 | 4CzIPN | Na <sub>2</sub> HPO <sub>4</sub>              | MeTHF           | 83    | 55                       |
| 14    | SA1                 | 4CzIPN | NaH <sub>2</sub> PO <sub>4</sub>              | MeTHF           | 83    | 36                       |
| 15    | SA1                 | 4CzIPN | NaHCO <sub>3</sub>                            | MeTHF           | 83    | 39                       |
| 16    | SA1                 | 4CzIPN | HCOONa                                        | MeTHF           | 83    | 45                       |
| 17    | SA1                 | 4CzIPN | LiOAc                                         | MeTHF           | 63    | 60                       |
| 18    | SA1                 | 4CzIPN | Li <sub>2</sub> CO <sub>3</sub>               | MeTHF           | 61    | 48                       |
| 19    | SA1                 | 4CzIPN | HCOOLi                                        | MeTHF           | 56    | 45                       |
| 20    | SA1                 | 4CzIPN | Li <sub>3</sub> PO <sub>4</sub>               | MeTHF           | 82    | 59                       |
| 21    | SA1                 | 4CzIPN | Li <sub>2</sub> SO <sub>4</sub>               | MeTHF           | 76    | 37                       |
| 22    | SA1                 | 4CzIPN | Li <sub>2</sub> C <sub>2</sub> O <sub>4</sub> | MeTHF           | 83    | 43                       |
| 23    | SA1                 | 4CzIPN | LiClO <sub>4</sub>                            | MeTHF           | 55    | 38                       |
| 24    | SA1                 | 4CzIPN | KOAc                                          | MeTHF           | 88    | 47                       |
| 25    | SA1                 | 4CzIPN | K <sub>3</sub> PO <sub>4</sub>                | MeTHF           | 89    | 17                       |
| 26    | SA1                 | 4CzIPN | K <sub>2</sub> CO <sub>3</sub>                | MeTHF           | 87    | 39                       |
| 27    | SA1                 | 4CzIPN | KHCO <sub>3</sub>                             | MeTHF           | 88    | 64                       |
| 28    | SA1                 | 4CzIPN | PhCOOLi                                       | MeTHF           | 91    | 57                       |
| 29    | SA1                 | 4CzIPN | PhCOONa                                       | MeTHF           | 88    | 60                       |
| 30    | SA1                 | 4CzIPN | PhCOOK                                        | MeTHF           | 93    | 83                       |
| 31    | SA1<br>0.1 mmol     | 4CzIPN | PhCOOK                                        | MeTHF           | 88    | 39                       |
| 32    | SA1 0.2<br>mmol     | 4CzIPN | PhCOOK                                        | MeTHF           | 92    | 72                       |
| 33    | SA1 0.4<br>mmol     | 4CzIPN | PhCOOK                                        | MeTHF           | 87    | 55                       |

<sup>[a]</sup> The reactions were performed with **1** (0.2 mmol), **2** (0.4 mmol), photocatalyst (2 mol%), silaCOgen (1.5 equiv.), base (2 equiv.) in solvent (2 mL) under LED irradiation for 5-10 hours, unless otherwise indicated. <sup>[b]</sup> Performed with PC **1** (5 mol%). <sup>[c]</sup> Yields were determined by isolated products, stereoselectivities were determined with <sup>19</sup>F-NMR analysis.

Table S2. Optimization of reaction conditions (2).<sup>[a]</sup>
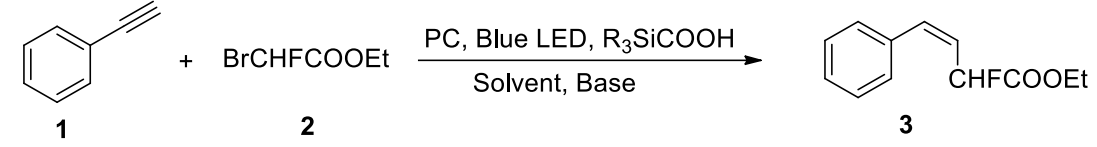

| Entry     | SilaCOgen  | PC                                                               | Base 0.4                 | Solvent      | Z (%)     | Yield (%) <sup>[c]</sup>    |
|-----------|------------|------------------------------------------------------------------|--------------------------|--------------|-----------|-----------------------------|
| 1         | SA1        | 4CzIPN                                                           | 0.1                      | MeTHF        | 75        | 46                          |
| 2         | SA1        | 4CzIPN                                                           | 0.2                      | MeTHF        | 84        | 62                          |
| 3         | SA1        | 4CzIPN                                                           | 0.3                      | MeTHF        | 91        | 65                          |
| 4         | SA1        | 4CzIPN                                                           | PhCO <sub>2</sub> K      | MeTHF        | 77        | 66                          |
| 5         | SA1        | 4CzTPN                                                           | PhCO <sub>2</sub> K      | MeTHF        | 59        | 43                          |
| 6         | SA1        | Ir(ppy) <sub>3</sub>                                             | PhCO <sub>2</sub> K      | MeTHF        | 92        | 67                          |
| 7         | SA1        | Ir(Fppy) <sub>3</sub>                                            | PhCO <sub>2</sub> K      | MeTHF        | 89        | 68                          |
| 8         | SA1        | (Ir[dFppy] <sub>2</sub> (bpy))PF <sub>6</sub>                    | PhCO <sub>2</sub> K      | MeTHF        | 88        | 67                          |
| 9         | SA1        | [Ir(dtbbpy)(ppy) <sub>2</sub> ]PF <sub>6</sub>                   | PhCO <sub>2</sub> K      | MeTHF        | 78        | 68                          |
| 10        | SA1        | Ir[dF(CF <sub>3</sub> )ppy] <sub>2</sub> (dtbbpy)PF <sub>6</sub> | PhCO <sub>2</sub> K      | MeTHF        | 84        | 68                          |
| 11        | SA2        | 4CzIPN                                                           | PhCO <sub>2</sub> K      | MeTHF        | 92        | 63                          |
| 12        | SA3        | 4CzIPN                                                           | PhCO <sub>2</sub> K      | MeTHF        | 92        | 55                          |
| 13        | SA1        | 4CzIPN, <b>1</b> 0.3 mmol <b>2</b> 0.2 mmol                      | PhCO <sub>2</sub> K      | MeTHF        | 93        | 60                          |
| 14        | SA1        | 4CzIPN, <b>1</b> 0.4 mmol <b>2</b> 0.2 mmol                      | PhCO <sub>2</sub> K      | MeTHF        | 93        | 62                          |
| 15        | SA1        | 4CzIPN, <b>1</b> 0.5 mmol <b>2</b> 0.2 mmol                      | PhCO <sub>2</sub> K      | MeTHF        | 93        | 64                          |
| 16        | SA1        | 4CzIPN 1%                                                        | PhCO <sub>2</sub> K      | MeTHF        | 93        | 78                          |
| 17        | SA1        | 4CzIPN 3%                                                        | PhCO <sub>2</sub> K      | MeTHF        | 93        | 86                          |
| 18        | SA1        | 4CzIPN 4%                                                        | PhCO <sub>2</sub> K      | MeTHF        | 93        | 89                          |
| <b>19</b> | <b>SA1</b> | <b>4CzIPN 5%</b>                                                 | <b>PhCO<sub>2</sub>K</b> | <b>MeTHF</b> | <b>93</b> | <b>97(91<sup>[c]</sup>)</b> |
| 20        | SA1        | 4CzIPN 6%                                                        | PhCO <sub>2</sub> K      | MeTHF        | 93        | 86                          |
| 21        | SA1        | 4CzIPN 7%                                                        | PhCO <sub>2</sub> K      | MeTHF        | 93        | 86                          |

<sup>[a]</sup> The reactions were performed with **1** (0.2 mmol), **2** (0.4 mmol), photocatalyst (2 mol%), SilaCOgen (1.5 equiv.), base (2 equiv.) in solvent (2 mL) under LED irradiation for 5-10 hours, unless otherwise indicated. <sup>[b]</sup> Performed with PC **1** (5 mol%). <sup>[c]</sup> Yields were determined by isolated products, stereoselectivities were determined with <sup>19</sup>F-NMR analysis.

Table S3. Optimization of reaction conditions<sup>[a]</sup>
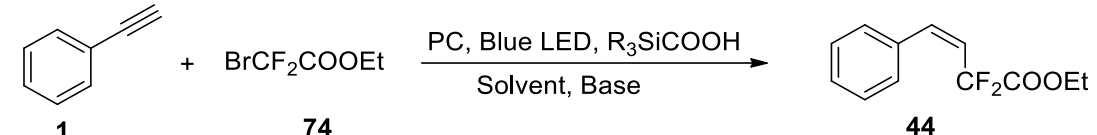

| Entry             | SilaCOgen | PC           | Base                            | Solvent | Z (%) | Yield (%) <sup>[c]</sup> |
|-------------------|-----------|--------------|---------------------------------|---------|-------|--------------------------|
| 1                 | 0.3       | 4CzIPN       | NB                              | MTHF    | 65    | 44                       |
| 2                 | 0.3       | 4CzIPN       | LiOAc                           | MTHF    | 65    | 66                       |
| 3                 | 0.3       | 4CzIPN       | Li <sub>2</sub> CO <sub>3</sub> | MTHF    | 62    | 72                       |
| 4                 | 0.3       | 4CzIPN       | PhCOOLi                         | MTHF    | 70    | 53                       |
| 5                 | 0.3       | 4CzIPN       | PhCOONa                         | MTHF    | 71    | 53                       |
| 6                 | 0.3       | 4CzIPN       | PhCOOK                          | MTHF    | 72    | 66                       |
| 7                 | 0.3       | 4CzIPN       | Potassium 1-naphthaleneacetate  | MTHF    | 77    | 70                       |
| 8                 | 0.3       | 4CzIPN<br>2% | Potassium 1-naphthaleneacetate  | MTHF    | 77    | 60                       |
| 9                 | 0.3       | 4CzIPN<br>3% | Potassium 1-naphthaleneacetate  | MTHF    | 77    | 67                       |
| 10 <sup>[b]</sup> | 0.3       | 4CzIPN<br>4% | Potassium 1-naphthaleneacetate  | MTHF    | 77    | 83                       |

<sup>[a]</sup> The reactions were performed with **1** (0.2 mmol), **2** (0.4 mmol), photocatalyst (5 mol%), SilaCOgen (1.5 equiv.), base (2 equiv.) in solvent (2 mL) under LED irradiation for 5-10 hours, unless otherwise indicated. <sup>[b]</sup> Performed with PC **1** (4 mol%). <sup>[c]</sup> Yields were determined by isolated products, stereoselectivities were determined with <sup>19</sup>F-NMR analysis.

## 4. Mechanistic studies

### 4.1 Radical trapping experiments

(1) Stir bar, photocatalyst 4CzIPN (7.9 mg, 0.01 mmol, 0.05 equiv.), anhydrous potassium benzoate (89.7 mg, 0.4 mmol, 2 equiv.), SilaCOgen (72.6 mg, 0.3 mmol, 1.5 equiv.), ethene-1,1-diyldibenzene (36.1 mg, 0.2 mmol, 1 equiv.), ethyl bromofluoroacetate (81.2 mg, 0.4 mmol, 2 equiv.) and 2-Me-THF (2 mL) were added to a Schlenk tube under argon atmosphere. The reaction mixture was stirred under the irradiation of 20 W blue LEDs (454 nm) at room temperature. After the reaction was completed for 10 hours (as monitored by TLC analysis). The solvent was removed under reduced pressure and the residue was purified by column chromatography (PE/EA = 100:1) to afford the fluoroalkylation products.

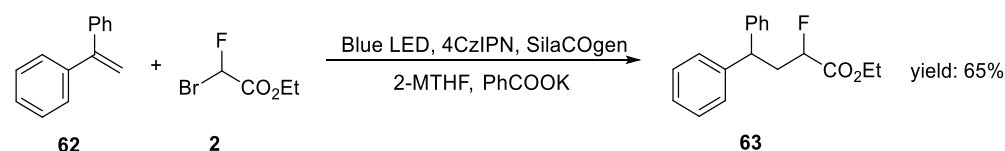

Figure S1

(2) Stir bar, photocatalyst 4CzIPN (7.9 mg, 0.01 mmol, 0.05 equiv.), anhydrous potassium benzoate (89.7 mg, 0.4 mmol, 2 equiv.), SilaCOgen (72.6 mg, 0.3 mmol, 1.5



equiv.), (1-cyclopropylvinyl)benzene (28.8 mg, 0.2 mmol, 1 equiv.), ethyl bromofluoroacetate (81.2 mg, 0.4 mmol, 2 equiv.) and 2-Me-THF (2 mL) were added to a Schlenk tube under argon atmosphere. The reaction mixture was stirred under the irradiation of 20 W blue LEDs (454 nm) at room temperature. After the reaction was completed for 10 hours. Radical-trapped product was detected by LC-MS.

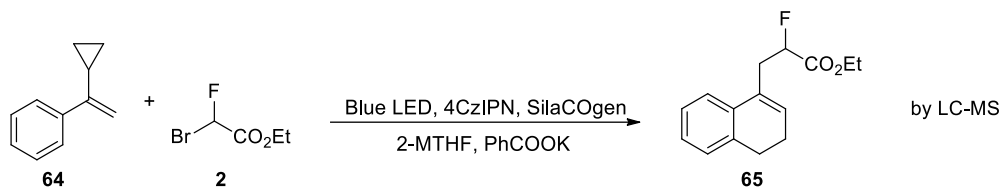

**Figure S2**

(3) Stir bar, photocatalyst 4CzIPN (7.9 mg, 0.01 mmol, 0.05 equiv.), anhydrous potassium benzoate (89.7 mg, 0.4 mmol, 2 equiv.), SilaCOgen (72.6 mg, 0.3 mmol, 1.5 equiv.), ethene-1,1-diylidibenzene (36.1 mg, 0.2 mmol, 1 equiv.) and 2-Me-THF (2 mL) were added to a Schlenk tube under argon atmosphere. The reaction mixture was stirred under the irradiation of 20 W blue LEDs (454 nm) at room temperature. After the reaction was completed for 6 hours (as monitored by TLC analysis). The solvent was removed under reduced pressure and the residue was purified by column chromatography (PE/EA = 100:1) to afford the (2,2-diphenylethyl)(methyl)diphenylsilane.

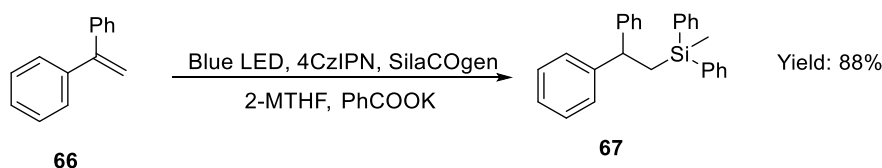

**Figure S3**

(4) Stir bar, photocatalyst 4CzIPN (7.9 mg, 0.01 mmol, 0.05 equiv.), anhydrous potassium benzoate (89.7 mg, 0.4 mmol, 2 equiv.), SilaCOgen (72.6 mg, 0.3 mmol, 1.5 equiv.), ethene-1,1-diylidibenzene (36.1 mg, 0.2 mmol, 1 equiv.), ethyl bromofluoroacetate (81.2 mg, 0.4 mmol, 2 equiv.) and 2-Me-THF (2 mL) were added to a Schlenk tube under argon atmosphere. The reaction mixture was stirred under the irradiation of 20 W blue LEDs (454 nm) at room temperature. After the reaction was completed for 10 hours (as monitored by TLC analysis). Triethylamine (0.4 mmol, 2 equiv.) and ethanol (1 mL) were added to the solution and stirred for 1h, then extracted (EA/H<sub>2</sub>O) and analyzed by GC-MS.

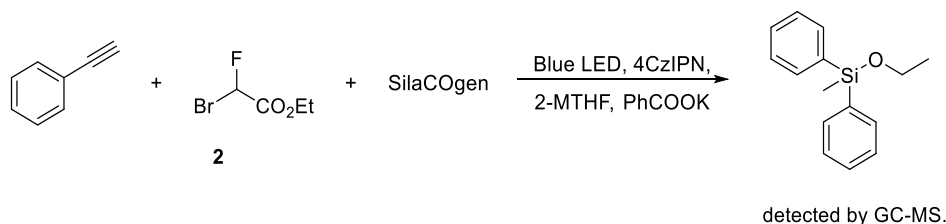

**Figure S4**

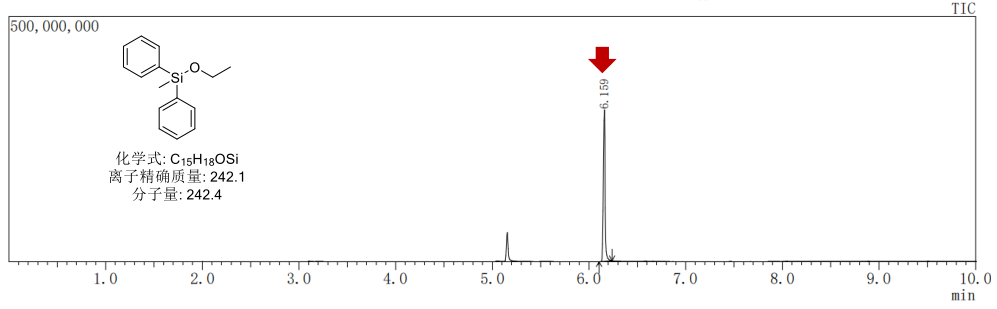

质谱

峰号:1 保留时间:6.159(扫描数:833)  
质量峰:635  
原始模式平均 6.155-6.165(832-834)  
背景模式:从峰计算 组 1 - 事件 1 Scan

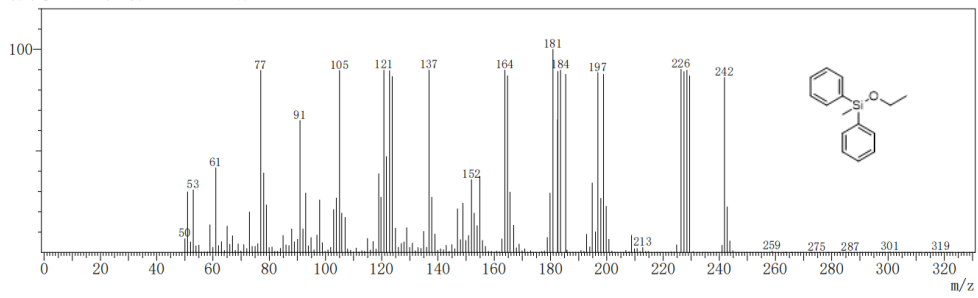

## 4.2 H/D exchange and KIE experiments

Prepare a reaction system of substrates containing C-H bonds (THF) and substrates containing C-D bonds (THF- $d_8$ ). The reaction is started under standard experimental conditions and samples are taken at certain intervals. Samples are analyzed using NMR analysis methods to determine concentrations or concentration changes of reactants and products. The reaction rate constants  $k_H$  and  $k_D$  were obtained by fitting the experimental data with the first-order reaction kinetics equation. Then calculate their ratio KIE.

Reaction 1:

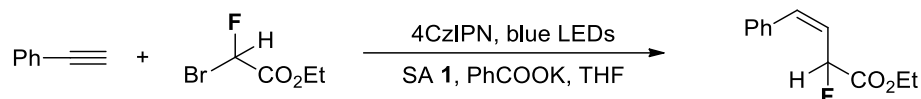

Reaction 2:

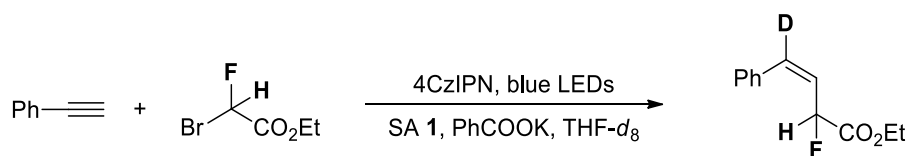

| Time (h) | C 1 (mmol/ml) | C (mmol/ml) |
|----------|---------------|-------------|
| 0.25     | 0.028         | 0.002       |
| 0.5      | 0.036         | 0.004       |
| 0.83333  | 0.042         | 0.007       |
| 1.25     | 0.053         | 0.011       |
| 2        | 0.067         | 0.015       |

Reaction 1:

$$y = a + b \cdot x$$

$$k = 0.02202 \pm 0.00108$$

$$R^2 = 0.99289$$

Reaction 2:

$$y = a + b \cdot x$$

$$k = 0.00758 \pm 5.55484E-4$$

$$R^2 = 0.98415$$

$$\text{KIE} = [k_H/k_D] = 2.9$$

## 4.3 Fluorescence quenching experiments

Experimental procedure: **PC1** was dissolved in MTHF in a 20 mL volumetric flask to set the concentration to be 0.01 M. Compound **2** was dissolved in MTHF in a 20 mL volumetric flask to set the concentration to be 0.01 M. **SA6** was dissolved in MTHF in a 20 mL volumetric flask to set the concentration to be 0.01 M. **PhCOOK** was dissolved in MTHF in a 20 mL volumetric flask to set the concentration to be 0.01 M. Different components were mixed in equal volume and diluted to 3 ml respectively for fluorescence quenching experiment, and the results in the figure were obtained.

#### 4.4 Cyclic voltammetry measurements

Cyclic voltammograms were taken on a Autolab PGSTAT 302N electrochemical analyzer/workstation (Switzerland Vantone China Co., LTD.) in CH<sub>3</sub>CN (Energy Chemical, 99.9%, with molecular sieves, water ≤ 50 ppm (by K.F.)) at room temperature using a glass carbon working electrode, a S20 platinum auxiliary electrode and 0.1 M NBu<sub>4</sub>PF<sub>6</sub> as supporting electrolyte. All potentials are referenced against the Ag/AgCl redox couple. 20 mM SilaCOgen was dissolved in an anhydrous CH<sub>3</sub>CN solution containing 0.1 M NBu<sub>4</sub>PF<sub>6</sub>. According to the above method, 20.0 mM BrCHFCO<sub>2</sub>Et, 20 mM 1-bromobutyl acetate, 20.0 mM SilaCOgen with PhCOOK and 2.0 mM 4CzIPN were prepared sequentially. The solution was degassed with nitrogen bubbling for 5 min prior to voltammetric studies. The scan rate was 100 mV/s.

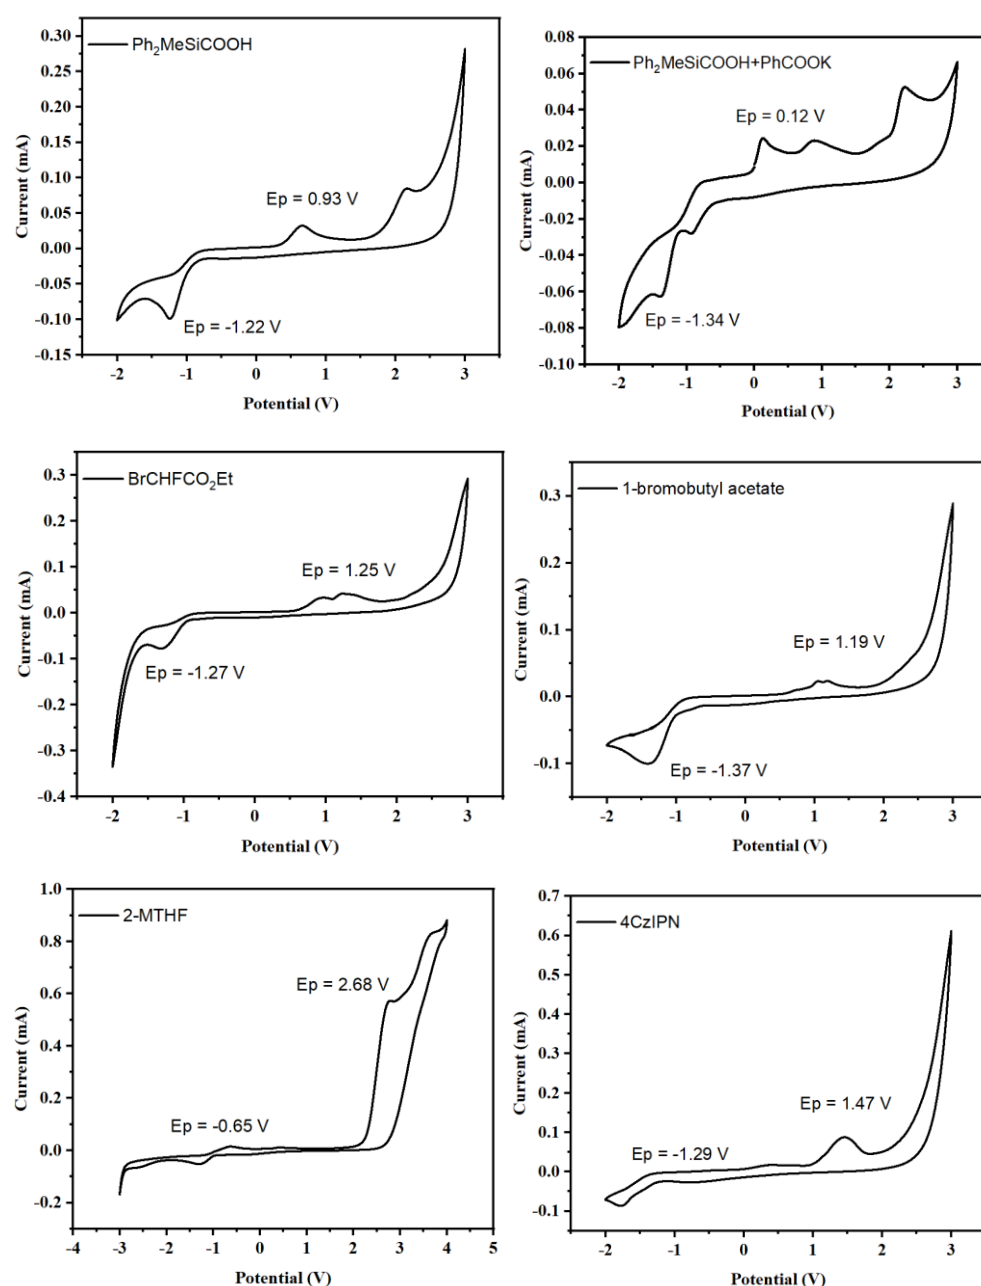

**Figure S4** Cyclic Voltammety of each reaction component

#### 4.5 Density Functional Theory Calculation and Atomic Coordination Energy Potential Profiles

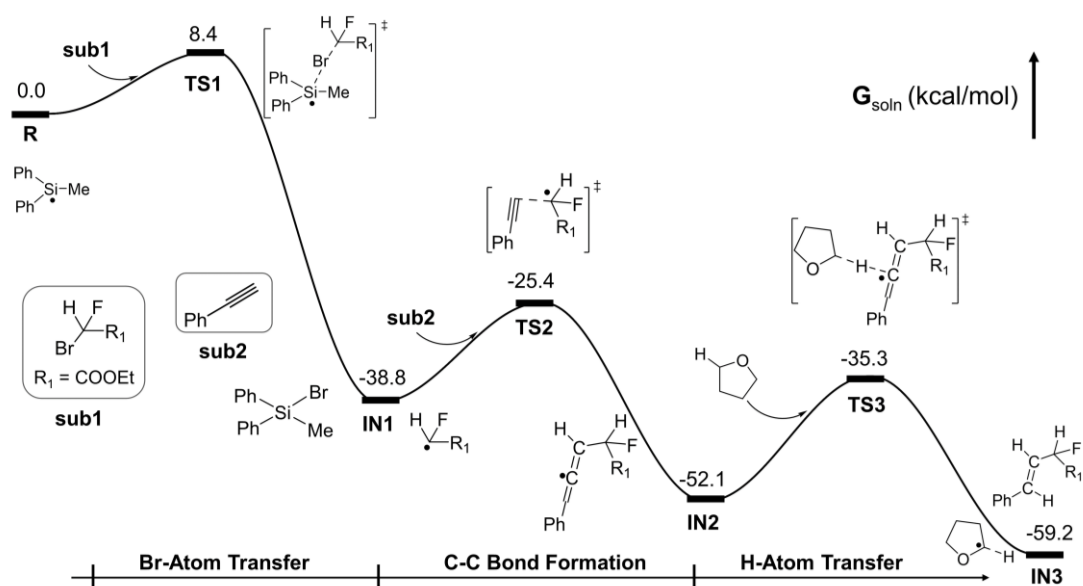

**Figure S5.** Free-energy potential ( $G_{\text{soln}}$ ) for the reactions initiated by silicon radical (**R**) to produce the *trans*-monofluoroalkylation (**IN3**).

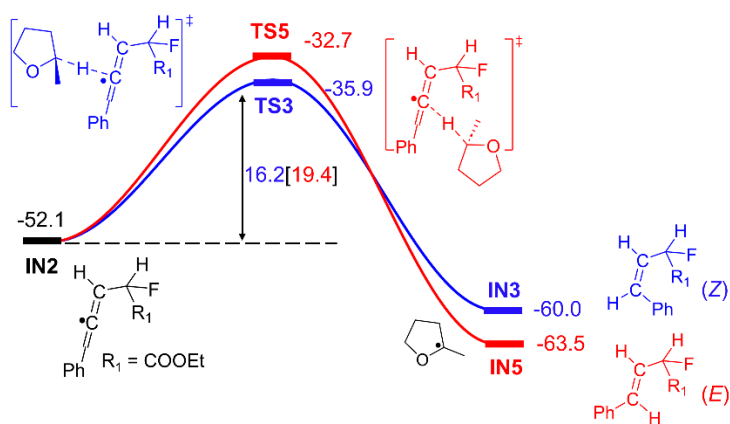

**Figure S6.** Free-energy potential ( $G_{\text{soln}}$ ) for the radical reactions from intermediate (**IN2**) to the *cis*-/*trans*-monofluoroalkylation (**IN3** & **IN5**).

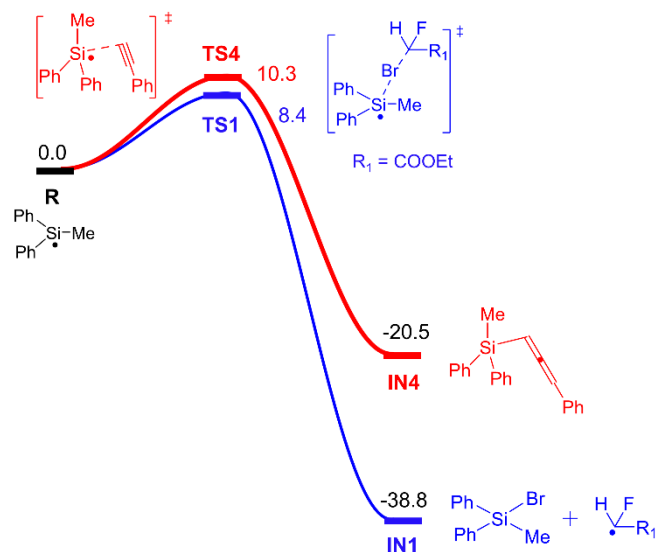

**Figure S7.** Free-energy potential (G<sub>soln</sub>) for the Si radical reacted with ethyl bromofluoroacetate (Br-atom transfer), and with phenylacetylene.

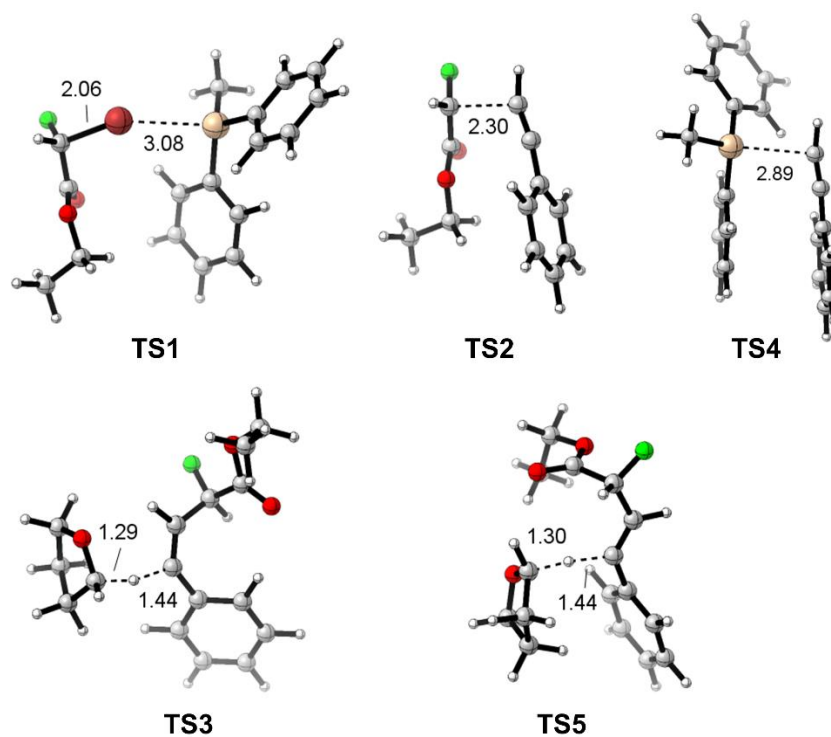

**Figure S8.** Key transition states (TSs) during the reactions initiated by silicon radical to produce the *trans*-monofluoroalkylation.

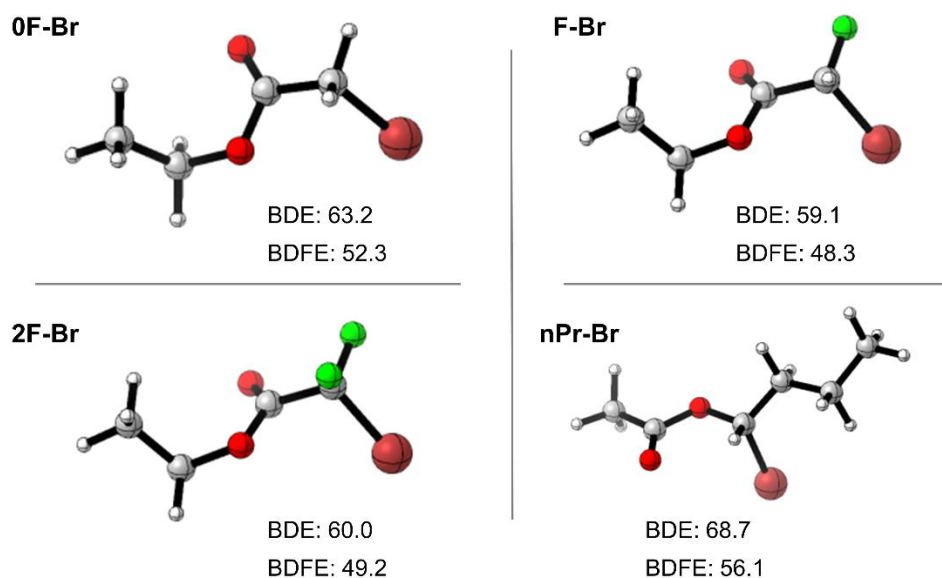

**Figure S9.** The bond dissociation energy and free-energy (BDE and DBFE, in kcal/mol) of homolytic Br-C (ethyl bromofluoroacetate).

**Table S4.** The absolute energy and free energies (in Hartree) of the optimized structures for the reactions initiated by silicon radical to produce the *trans*-monofluoroalkylation by the PCM B3LYP-D3//B3LYP-D3 method in THF solution.

|                | <b>E</b>     | <b>G</b>     | <b>E<sub>soln</sub></b> | <b>G<sub>soln</sub></b> |
|----------------|--------------|--------------|-------------------------|-------------------------|
| <b>R</b>       | -792.309004  | -792.132292  | -792.926772             | -792.750060             |
| <b>F-Br</b>    | -2979.911602 | -2979.846418 | -2980.704889            | -2980.639705            |
| <b>TS1</b>     | -3772.233764 | -3771.972242 | -3773.637970            | -3773.376448            |
| <b>Fsub</b>    | -3366.291384 | -3366.115862 | -3367.226033            | -3367.050511            |
| <b>IN1</b>     | -405.987931  | -405.923089  | -406.465879             | -406.401037             |
| <b>PhC</b>     | -308.199971  | -308.120556  | -308.527459             | -308.448044             |
| <b>TS2</b>     | -714.191731  | -714.028188  | -714.991385             | -714.827842             |
| <b>IN2</b>     | -714.238247  | -714.072524  | -715.036127             | -714.870404             |
| <b>THF-Me</b>  | -271.580962  | -271.466764  | -271.893814             | -271.779616             |
| <b>TS3</b>     | -985.795050  | -985.497157  | -986.922030             | -986.624137             |
| <b>IN3</b>     | -985.838902  | -985.555802  | -986.945673             | -986.662573             |
| <b>THFr-Me</b> | -270.926731  | -270.827057  | -271.237892             | -271.138218             |
| <b>TS4</b>     | -1100.521119 | -1100.245675 | -1101.457212            | -1101.181768            |
| <b>IN4</b>     | -1100.573645 | -1100.296325 | -1101.508048            | -1101.230729            |
| <b>TS5</b>     | -985.794148  | -985.495444  | -986.917738             | -986.619034             |
| <b>IN5</b>     | -985.838242  | -985.557568  | -986.948818             | -986.668144             |

**Table S5.** The absolute energy and free energies (in Hartree) of the optimized structures for Br-C bond homolytic by the PCM B3LYP-D3//B3LYP-D3 method in THF solution.

|              | <b>E</b>     | <b>G</b>     | <b>E<sub>soln</sub></b> | <b>G<sub>soln</sub></b> |
|--------------|--------------|--------------|-------------------------|-------------------------|
| <b>Br</b>    | -2573.826536 | -2573.843366 | -2574.144854            | -2574.161684            |
| <b>0FA</b>   | -306.831322  | -306.757966  | -307.186026             | -307.112670             |
| <b>0F-Br</b> | -2880.761214 | -2880.687391 | -2881.431520            | -2881.357697            |

|               |              |              |              |              |
|---------------|--------------|--------------|--------------|--------------|
| <b>FA</b>     | -405.987931  | -405.923089  | -406.465879  | -406.401037  |
| <b>F-Br</b>   | -2979.911602 | -2979.846418 | -2980.704889 | -2980.639705 |
| <b>2FA</b>    | -505.148452  | -505.092842  | -505.744857  | -505.689247  |
| <b>2F-Br</b>  | -3079.074919 | -3079.019013 | -3079.985312 | -3079.929406 |
| <b>nPrA</b>   | -385.413426  | -385.291125  | -385.850467  | -385.728166  |
| <b>nPr-Br</b> | -2959.352085 | -2959.226668 | -2960.104738 | -2959.979321 |

### XYZ Coordinates

|                 |           |           |           |                  |           |           |           |
|-----------------|-----------|-----------|-----------|------------------|-----------|-----------|-----------|
| <b>R.xyz</b>    |           |           |           | C                | 2.603823  | -0.954018 | 0.208659  |
| Si              | 0.033001  | 1.186137  | -0.569435 | H                | 2.695198  | -2.021002 | -0.036221 |
| C               | 0.064275  | 2.862932  | 0.307626  | H                | 2.527353  | -0.838433 | 1.299682  |
| H               | 1.009813  | 3.389674  | 0.106447  | H                | -0.514007 | 0.567697  | -1.646861 |
| H               | -0.761482 | 3.509555  | -0.027626 | C                | 3.763007  | -0.148763 | -0.348413 |
| H               | -0.019865 | 2.729212  | 1.400605  | H                | 3.668177  | 0.911486  | -0.072661 |
| C               | 1.570428  | 0.180492  | -0.170109 | H                | 4.711429  | -0.527207 | 0.064261  |
| C               | 1.512982  | -1.149347 | 0.296466  | H                | 3.806995  | -0.231136 | -1.445292 |
| C               | 2.846451  | 0.757856  | -0.347831 |                  |           |           |           |
| C               | 2.678107  | -1.866795 | 0.576936  | <b>A4opt.xyz</b> |           |           |           |
| H               | 0.543789  | -1.626148 | 0.458665  | Si               | 0.004351  | 0.529869  | 0.626427  |
| C               | 4.011327  | 0.044410  | -0.064808 | C                | -0.007105 | 1.061071  | 2.423651  |
| H               | 2.931667  | 1.784634  | -0.716769 | H                | 0.926302  | 1.593751  | 2.660541  |
| C               | 3.930808  | -1.273585 | 0.397170  | H                | -0.851521 | 1.732991  | 2.640956  |
| H               | 2.607084  | -2.893875 | 0.944366  | H                | -0.076255 | 0.177788  | 3.079468  |
| H               | 4.987087  | 0.515881  | -0.207530 | C                | 1.500437  | -0.530941 | 0.224747  |
| H               | 4.842075  | -1.835407 | 0.616562  | C                | 1.411844  | -1.927383 | 0.379481  |
| C               | -1.559060 | 0.249623  | -0.239079 | C                | 2.734003  | 0.019860  | -0.164951 |
| C               | -1.788311 | -1.022197 | -0.808123 | C                | 2.522048  | -2.746488 | 0.158361  |
| C               | -2.590661 | 0.812871  | 0.540718  | H                | 0.461179  | -2.384272 | 0.668383  |
| C               | -2.982508 | -1.709380 | -0.588353 | C                | 3.845207  | -0.796457 | -0.387489 |
| H               | -1.020818 | -1.479254 | -1.439133 | H                | 2.821973  | 1.099838  | -0.308158 |
| C               | -3.788955 | 0.129065  | 0.758555  | C                | 3.741196  | -2.181219 | -0.225242 |
| H               | -2.455544 | 1.798728  | 0.993138  | H                | 2.433830  | -3.828933 | 0.280717  |
| C               | -3.987612 | -1.135502 | 0.197491  | H                | 4.795211  | -0.351224 | -0.693534 |
| H               | -3.133902 | -2.694805 | -1.036341 | H                | 4.609707  | -2.820480 | -0.402649 |
| H               | -4.570838 | 0.584387  | 1.371870  | C                | -1.567062 | -0.374471 | 0.157195  |
| H               | -4.924706 | -1.671172 | 0.367875  | C                | -1.668637 | -1.011710 | -1.094086 |
|                 |           |           |           | C                | -2.668427 | -0.437295 | 1.028456  |
| <b>F-Br.xyz</b> |           |           |           | C                | -2.832201 | -1.688179 | -1.462282 |
| C               | -0.599708 | 0.734103  | -0.564253 | H                | -0.824946 | -0.978161 | -1.788971 |
| Br              | -1.893540 | -0.611638 | 0.074238  | C                | -3.835381 | -1.115471 | 0.664115  |
| F               | -1.054906 | 1.970190  | -0.305140 | H                | -2.620825 | 0.047851  | 2.006744  |
| C               | 0.731046  | 0.500384  | 0.148830  | C                | -3.918290 | -1.741248 | -0.581983 |
| O               | 1.349677  | -0.554391 | -0.385307 | H                | -2.894300 | -2.176414 | -2.438006 |
| O               | 1.135812  | 1.182390  | 1.049818  | H                | -4.681540 | -1.154886 | 1.354569  |



|           |           |           |           |          |           |           |           |
|-----------|-----------|-----------|-----------|----------|-----------|-----------|-----------|
| H         | -4.829872 | -2.271381 | -0.868913 | C        | -3.677403 | 1.312621  | -0.944863 |
| Br        | 0.146410  | 2.420427  | -0.619456 | H        | -1.618853 | 1.014705  | -1.488883 |
| A5opt.xyz |           |           |           | H        | -3.132092 | -1.484841 | 1.686495  |
| C         | 0.000000  | 0.000000  | -0.000113 | H        | -5.351131 | -0.389343 | 1.490183  |
| O         | 0.000000  | 0.000000  | 1.163083  | H        | -5.709307 | 1.410864  | -0.201064 |
| O         | 0.000000  | 0.000000  | -1.162998 | H        | -3.827259 | 2.100966  | -1.686445 |
| IN3.xyz   |           |           |           | C        | -0.923431 | -1.004003 | 0.267006  |
| C         | -3.354706 | 0.764494  | 0.804978  | C        | 0.193434  | -0.801722 | -0.449833 |
| C         | -2.026082 | 0.370076  | 0.546526  | H        | 0.241461  | -0.065961 | -1.258172 |
| C         | -1.809603 | -0.817256 | -0.181293 | C        | 1.481746  | -1.513195 | -0.182597 |
| C         | -2.892102 | -1.554451 | -0.667559 | H        | 1.348962  | -2.321667 | 0.552933  |
| C         | -4.202765 | -1.133696 | -0.430542 | C        | 2.498113  | -0.536101 | 0.411416  |
| C         | -4.431127 | 0.028336  | 0.314351  | O        | 2.763324  | -0.484073 | 1.586415  |
| H         | -3.537300 | 1.671024  | 1.388145  | O        | 2.999457  | 0.271438  | -0.528986 |
| H         | -0.796357 | -1.191501 | -0.332622 | C        | 3.921025  | 1.291168  | -0.096028 |
| H         | -2.705428 | -2.475417 | -1.225192 | H        | 4.515985  | 1.525147  | -0.989724 |
| H         | -5.045187 | -1.716281 | -0.811059 | H        | 4.579641  | 0.868315  | 0.676688  |
| H         | -5.452980 | 0.358437  | 0.516391  | C        | 3.186211  | 2.513729  | 0.423269  |
| C         | -0.936129 | 1.210852  | 1.066207  | H        | 2.614277  | 2.266313  | 1.329315  |
| C         | 0.275164  | 1.454513  | 0.535412  | H        | 3.908536  | 3.305235  | 0.678358  |
| H         | 0.968786  | 2.114536  | 1.066259  | H        | 2.495566  | 2.908690  | -0.337727 |
| C         | 0.824745  | 0.960705  | -0.770854 | F        | 1.982382  | -2.045834 | -1.359517 |
| H         | 0.029739  | 0.588587  | -1.434715 | H        | -0.891317 | -1.757841 | 1.062348  |
| C         | 1.799743  | -0.193018 | -0.529498 | Fsub.xyz |           |           |           |
| O         | 1.455124  | -1.351943 | -0.502477 | C        | 1.709173  | -0.597949 | 0.167590  |
| O         | 3.037910  | 0.240689  | -0.303597 | H        | 1.819363  | -1.668135 | 0.353808  |
| C         | 4.035823  | -0.750725 | 0.016894  | C        | 0.466475  | 0.073261  | -0.164390 |
| H         | 4.989829  | -0.277972 | -0.253895 | O        | 0.351713  | 1.263365  | -0.372093 |
| H         | 3.875161  | -1.633240 | -0.619317 | O        | -0.542377 | -0.826324 | -0.211122 |
| C         | 3.991200  | -1.121048 | 1.488065  | C        | -1.849713 | -0.314466 | -0.518968 |
| H         | 3.039196  | -1.612346 | 1.735982  | H        | -2.400323 | -1.178335 | -0.917544 |
| H         | 4.809857  | -1.819523 | 1.722831  | H        | -1.757594 | 0.448311  | -1.306782 |
| H         | 4.107166  | -0.227446 | 2.120405  | C        | -2.531574 | 0.259251  | 0.711164  |
| F         | 1.477768  | 2.006377  | -1.397433 | H        | -1.986981 | 1.140485  | 1.079911  |
| H         | -1.171628 | 1.741091  | 1.996147  | H        | -3.558102 | 0.570088  | 0.460002  |
| IN5.xyz   |           |           |           | H        | -2.584201 | -0.490750 | 1.515448  |
| C         | -2.432470 | 0.698741  | -0.833273 | F        | 2.802998  | 0.129048  | 0.256500  |
| C         | -2.213752 | -0.320817 | 0.114250  | IN4.xyz  |           |           |           |
| C         | -3.285527 | -0.696579 | 0.944727  | C        | -3.286448 | -1.706499 | 0.127450  |
| C         | -4.533298 | -0.081136 | 0.834578  | C        | -2.212008 | -1.340117 | -0.738211 |
| C         | -4.734344 | 0.926128  | -0.111666 | C        | -2.436198 | -0.291782 | -1.680188 |
|           |           |           |           | C        | -3.654840 | 0.369341  | -1.719344 |

|         |           |           |           |         |           |           |           |
|---------|-----------|-----------|-----------|---------|-----------|-----------|-----------|
| C       | -4.695452 | 0.007613  | -0.850237 | C       | 1.515083  | -1.209644 | 0.000035  |
| C       | -4.499851 | -1.036020 | 0.066996  | H       | -0.430415 | -2.156573 | 0.000430  |
| H       | -3.130785 | -2.511901 | 0.847831  | H       | -0.431715 | 2.155856  | 0.000420  |
| H       | -1.620813 | 0.004665  | -2.341520 | H       | 2.057908  | 2.157895  | 0.000187  |
| H       | -3.798675 | 1.187869  | -2.428821 | H       | 3.308506  | 0.000779  | -0.000244 |
| H       | -5.651356 | 0.534455  | -0.887986 | H       | 2.059224  | -2.157070 | 0.000175  |
| H       | -5.307584 | -1.322566 | 0.745348  | C       | -2.026424 | -0.000737 | 0.000045  |
| C       | -0.976419 | -1.976773 | -0.656013 | C       | -3.240268 | 0.000364  | -0.000228 |
| C       | 0.268965  | -2.106212 | -0.271306 | H       | -4.313582 | 0.000444  | 0.000471  |
| H       | 0.874922  | -2.969701 | -0.592239 |         |           |           |           |
| Si      | 1.080251  | -0.776151 | 0.815664  | IN2.xyz |           |           |           |
| C       | 1.346789  | -1.429193 | 2.561643  | C       | 2.643094  | 1.275989  | -0.176332 |
| H       | 0.388387  | -1.733592 | 3.010708  | C       | 2.275191  | -0.084638 | -0.435342 |
| H       | 2.012194  | -2.307088 | 2.555072  | C       | 3.299510  | -1.083159 | -0.352150 |
| H       | 1.794095  | -0.660007 | 3.211593  | C       | 4.600158  | -0.731487 | -0.026574 |
| C       | -0.078707 | 0.706537  | 0.813166  | C       | 4.940314  | 0.607819  | 0.224388  |
| C       | 0.149644  | 1.804471  | -0.034593 | C       | 3.951037  | 1.601702  | 0.146758  |
| C       | -1.264868 | 0.691474  | 1.569345  | H       | 1.873116  | 2.047443  | -0.231379 |
| C       | -0.778983 | 2.844404  | -0.133363 | H       | 3.035025  | -2.124326 | -0.544929 |
| H       | 1.063968  | 1.845138  | -0.632394 | H       | 5.367050  | -1.507511 | 0.036437  |
| C       | -2.199080 | 1.723381  | 1.470057  | H       | 5.967909  | 0.874671  | 0.480139  |
| H       | -1.481270 | -0.152173 | 2.230192  | H       | 4.211640  | 2.644141  | 0.345899  |
| C       | -1.957970 | 2.802164  | 0.614776  | C       | 0.981070  | -0.416898 | -0.771029 |
| H       | -0.583669 | 3.688091  | -0.800391 | C       | -0.273147 | -0.752605 | -0.894810 |
| H       | -3.123837 | 1.679338  | 2.049951  | H       | -0.772785 | -0.815197 | -1.872954 |
| H       | -2.691115 | 3.608238  | 0.530202  | C       | -1.175468 | -1.061705 | 0.291813  |
| C       | 2.723256  | -0.314151 | 0.018165  | H       | -1.638953 | -2.055673 | 0.148813  |
| C       | 2.862687  | -0.330888 | -1.382413 | C       | -2.300941 | -0.029671 | 0.378111  |
| C       | 3.829478  | 0.093520  | 0.785588  | O       | -2.430457 | 0.781837  | 1.253167  |
| C       | 4.059196  | 0.050529  | -1.995035 | O       | -3.107640 | -0.159669 | -0.688810 |
| H       | 2.020899  | -0.649509 | -2.004131 | C       | -4.209665 | 0.763958  | -0.796749 |
| C       | 5.029488  | 0.474151  | 0.179040  | H       | -4.440939 | 0.795568  | -1.870642 |
| H       | 3.757666  | 0.116631  | 1.876510  | H       | -3.869881 | 1.758120  | -0.471098 |
| C       | 5.145817  | 0.454072  | -1.213736 | C       | -5.403371 | 0.301495  | 0.018457  |
| H       | 4.145886  | 0.030263  | -3.084447 | H       | -5.162726 | 0.301159  | 1.091418  |
| H       | 5.876885  | 0.786978  | 0.794465  | H       | -6.253691 | 0.982865  | -0.142707 |
| H       | 6.083699  | 0.750855  | -1.689952 | H       | -5.712264 | -0.712543 | -0.278801 |
|         |           |           |           | F       | -0.473936 | -1.056761 | 1.461745  |
| PhC.xyz |           |           |           | TS1.xyz |           |           |           |
| C       | 0.120971  | -1.214575 | 0.000144  | Si      | 1.687682  | -0.314981 | 0.806040  |
| C       | -0.594943 | -0.000406 | -0.000185 | C       | 3.313612  | -0.160300 | -0.100775 |
| C       | 0.120235  | 1.214192  | 0.000131  | C       | 4.500180  | -0.706121 | 0.433923  |
| C       | 1.514368  | 1.210123  | 0.000047  | C       | 3.385048  | 0.449001  | -1.373263 |
| C       | 2.215991  | 0.000460  | -0.000229 |         |           |           |           |

|         |           |           |           |          |           |           |           |
|---------|-----------|-----------|-----------|----------|-----------|-----------|-----------|
| C       | 5.708005  | -0.628867 | -0.262285 | H        | -1.989244 | -0.928066 | -0.285905 |
| H       | 4.483403  | -1.192913 | 1.412540  | H        | -1.211975 | -0.645924 | 1.302552  |
| C       | 4.591676  | 0.529617  | -2.068207 | H        | 1.505568  | -0.682323 | 1.108958  |
| H       | 2.479495  | 0.858870  | -1.828754 | H        | 1.981426  | -0.659001 | -0.612206 |
| C       | 5.758342  | -0.008372 | -1.513927 | H        | 0.990606  | 1.592228  | 0.955024  |
| H       | 6.615452  | -1.053038 | 0.174983  | H        | 1.170989  | 1.601156  | -0.807686 |
| H       | 4.623182  | 1.008961  | -3.049917 | H        | -1.375597 | 1.656548  | 0.517323  |
| H       | 6.703396  | 0.051963  | -2.059117 | H        | -1.116400 | 1.163589  | -1.172305 |
| C       | 0.685232  | 1.267657  | 0.871199  |          |           |           |           |
| C       | -0.611671 | 1.249295  | 1.428789  | THFr.xyz |           |           |           |
| C       | 1.165915  | 2.492635  | 0.362810  | C        | -0.529628 | -1.123340 | 0.037781  |
| C       | -1.393091 | 2.404173  | 1.480427  | O        | 0.818216  | -0.939253 | -0.115997 |
| H       | -1.034124 | 0.317252  | 1.809632  | C        | 1.120773  | 0.426551  | 0.173783  |
| C       | 0.383939  | 3.649082  | 0.411954  | C        | -0.143034 | 1.198774  | -0.214768 |
| H       | 2.168738  | 2.547420  | -0.066844 | C        | -1.256494 | 0.188098  | 0.139054  |
| C       | -0.897574 | 3.608828  | 0.969992  | H        | 1.340779  | 0.534203  | 1.253195  |
| H       | -2.396781 | 2.350512  | 1.907524  | H        | 2.018481  | 0.706693  | -0.395770 |
| H       | 0.779802  | 4.588255  | 0.016847  | H        | -0.234178 | 2.160122  | 0.311107  |
| H       | -1.508461 | 4.514412  | 1.007644  | H        | -0.141341 | 1.398791  | -1.298059 |
| C       | 1.830514  | -1.169345 | 2.477861  | H        | -1.641477 | 0.371174  | 1.162028  |
| H       | 0.833629  | -1.272105 | 2.932073  | H        | -2.125759 | 0.257207  | -0.536730 |
| H       | 2.263604  | -2.176545 | 2.378624  | H        | -0.911937 | -2.054670 | -0.382903 |
| H       | 2.462255  | -0.581524 | 3.166411  |          |           |           |           |
| C       | -2.800202 | -2.047938 | -0.300458 | TS4.xyz  |           |           |           |
| Br      | -0.744194 | -1.879841 | -0.265797 | C        | 3.362216  | -0.818803 | -1.610707 |
| F       | -3.203854 | -2.771342 | 0.753602  | C        | 2.249889  | -1.287330 | -0.876845 |
| C       | -3.298110 | -0.621278 | -0.221001 | C        | 2.403371  | -1.550756 | 0.500676  |
| O       | -3.248983 | -0.057236 | -1.429893 | C        | 3.630405  | -1.340651 | 1.123312  |
| O       | -3.634127 | -0.080738 | 0.801929  | C        | 4.725610  | -0.872401 | 0.390031  |
| C       | -3.503309 | 1.361407  | -1.513034 | C        | 4.585527  | -0.613718 | -0.978100 |
| H       | -3.024099 | 1.666577  | -2.453366 | H        | 3.246061  | -0.612454 | -2.676218 |
| H       | -2.989239 | 1.857207  | -0.677342 | H        | 1.543060  | -1.896579 | 1.074797  |
| H       | -3.028927 | -2.546900 | -1.250882 | H        | 3.731302  | -1.534209 | 2.193594  |
| C       | -4.988862 | 1.670524  | -1.517522 | H        | 5.685972  | -0.706898 | 0.883765  |
| H       | -5.448194 | 1.384985  | -0.560507 | H        | 5.437987  | -0.247503 | -1.555365 |
| H       | -5.142587 | 2.751202  | -1.665744 | C        | 0.990236  | -1.467833 | -1.510450 |
| H       | -5.499615 | 1.135474  | -2.333094 | C        | -0.123893 | -1.501983 | -2.015532 |
|         |           |           |           | H        | -1.028809 | -1.783382 | -2.521775 |
| THF.xyz |           |           |           | Si       | -1.381318 | 0.890146  | -0.986488 |
| C       | -1.097211 | -0.511934 | 0.205171  | C        | -1.972047 | 2.483769  | -1.826146 |
| O       | 0.039228  | -1.203137 | -0.270625 | H        | -1.120106 | 3.018182  | -2.274586 |
| C       | 1.165238  | -0.421421 | 0.086473  | H        | -2.702443 | 2.278458  | -2.624324 |
| C       | 0.711012  | 1.061387  | 0.032619  | H        | -2.442217 | 3.159316  | -1.089496 |
| C       | -0.823905 | 0.959783  | -0.131055 | C        | 0.030196  | 1.236052  | 0.207045  |

|         |           |           |           |         |           |           |           |
|---------|-----------|-----------|-----------|---------|-----------|-----------|-----------|
| C       | -0.046652 | 0.931222  | 1.580653  | H       | -0.030903 | 1.764586  | 0.964783  |
| C       | 1.237294  | 1.780854  | -0.276569 | C       | -0.755563 | 3.296407  | -0.389992 |
| C       | 1.033666  | 1.168789  | 2.433935  | H       | -1.718869 | 3.403131  | 0.129938  |
| H       | -0.967081 | 0.509194  | 1.991191  | H       | -0.079725 | 4.087895  | -0.028557 |
| C       | 2.318469  | 2.017915  | 0.571988  | H       | -0.915587 | 3.444950  | -1.469226 |
| H       | 1.341575  | 2.006377  | -1.342129 | F       | -3.694169 | -1.219576 | 0.007518  |
| C       | 2.219800  | 1.709920  | 1.931557  |         |           |           |           |
| H       | 0.948985  | 0.928216  | 3.497024  | TS3.xyz |           |           |           |
| H       | 3.248657  | 2.424701  | 0.168816  | C       | -2.689483 | 1.566271  | 0.156860  |
| H       | 3.069756  | 1.883758  | 2.595766  | C       | -1.321140 | 1.389221  | -0.147914 |
| C       | -2.795813 | -0.036444 | -0.171860 | C       | -0.544039 | 2.533091  | -0.444300 |
| C       | -2.561211 | -1.238103 | 0.533174  | C       | -1.121214 | 3.803371  | -0.416854 |
| C       | -4.132177 | 0.399289  | -0.293750 | C       | -2.473864 | 3.963734  | -0.101571 |
| C       | -3.610031 | -1.957427 | 1.106938  | C       | -3.255163 | 2.838622  | 0.187453  |
| H       | -1.540122 | -1.617653 | 0.623761  | H       | -3.301724 | 0.690273  | 0.382663  |
| C       | -5.184181 | -0.321974 | 0.275570  | H       | 0.513237  | 2.412632  | -0.687897 |
| H       | -4.356530 | 1.321871  | -0.835716 | H       | -0.505584 | 4.677378  | -0.643936 |
| C       | -4.926723 | -1.501361 | 0.980374  | H       | -2.920192 | 4.960833  | -0.083687 |
| H       | -3.401674 | -2.882053 | 1.651522  | H       | -4.312879 | 2.956337  | 0.435824  |
| H       | -6.210382 | 0.040177  | 0.171795  | C       | -0.746803 | 0.059877  | -0.186946 |
| H       | -5.749242 | -2.065734 | 1.426644  | C       | 0.359747  | -0.480211 | 0.319278  |
|         |           |           |           | H       | 0.614825  | -1.522241 | 0.087636  |
| TS2.xyz |           |           |           | C       | 1.347899  | 0.225059  | 1.212474  |
| C       | 2.039276  | -1.007300 | -1.122047 | H       | 0.936961  | 1.177995  | 1.580992  |
| C       | 1.299521  | -1.210100 | 0.064904  | C       | 2.603499  | 0.551270  | 0.406036  |
| C       | 1.771965  | -0.644205 | 1.271237  | O       | 2.689620  | 1.527892  | -0.302091 |
| C       | 2.944370  | 0.106884  | 1.282435  | O       | 3.541760  | -0.386218 | 0.531270  |
| C       | 3.666451  | 0.307631  | 0.100354  | C       | 4.733536  | -0.234007 | -0.265895 |
| C       | 3.209076  | -0.252533 | -1.098783 | H       | 5.498958  | -0.812870 | 0.269144  |
| H       | 1.673393  | -1.437637 | -2.055667 | H       | 5.021753  | 0.827323  | -0.274429 |
| H       | 1.197376  | -0.793650 | 2.186976  | C       | 4.521676  | -0.754743 | -1.675865 |
| H       | 3.297434  | 0.543388  | 2.219630  | H       | 3.769204  | -0.150558 | -2.203031 |
| H       | 4.584765  | 0.899084  | 0.113053  | H       | 5.465247  | -0.699442 | -2.241512 |
| H       | 3.770308  | -0.096829 | -2.023132 | H       | 4.188370  | -1.803739 | -1.659444 |
| C       | 0.080046  | -1.931854 | 0.048592  | F       | 1.657131  | -0.583013 | 2.290267  |
| C       | -1.073511 | -2.362666 | 0.017218  | C       | -1.935837 | -2.098266 | -1.297980 |
| H       | -1.874152 | -3.078373 | 0.114842  | C       | -1.668014 | -3.572968 | 0.468354  |
| C       | -2.590968 | -0.730107 | -0.552001 | C       | -2.921507 | -2.729174 | 0.737385  |
| H       | -2.508603 | -0.886795 | -1.629562 | C       | -3.308286 | -2.262960 | -0.673799 |
| C       | -1.968937 | 0.414675  | 0.108872  | H       | -1.470263 | -0.968129 | -0.888259 |
| O       | -2.265905 | 0.846736  | 1.200677  | H       | -1.855025 | -2.070237 | -2.394190 |
| O       | -0.959963 | 0.878520  | -0.661281 | H       | -1.909564 | -4.642471 | 0.336647  |
| C       | -0.150003 | 1.931766  | -0.115055 | H       | -0.910594 | -3.484496 | 1.262946  |
| H       | 0.828678  | 1.812779  | -0.600322 | H       | -3.712327 | -3.297534 | 1.247349  |

H -2.666494 -1.859132 1.362068  
H -3.888073 -3.040173 -1.203825  
H -3.899357 -1.335371 -0.686157  
O -1.113468 -3.086471 -0.763130

TS5.xyz

C 2.436427 -1.898902 -0.642103  
C 1.443697 -1.174800 0.050537  
C 1.780860 -0.583401 1.288086  
C 3.063873 -0.720874 1.814032  
C 4.041241 -1.440767 1.116174  
C 3.719920 -2.030709 -0.110820  
H 2.187594 -2.351150 -1.604692  
H 1.021224 -0.006743 1.819320  
H 3.306440 -0.262583 2.776225  
H 5.047988 -1.542443 1.527905  
H 4.476502 -2.598022 -0.658766  
C 0.130901 -0.947010 -0.521646  
C -0.930665 -1.735068 -0.635353  
H -0.918185 -2.764304 -0.247226  
C -2.276992 -1.335986 -1.202965  
H -2.213748 -1.023904 -2.257762  
C -2.843768 -0.152014 -0.418434  
O -2.918966 0.966406 -0.868934  
O -3.168912 -0.502222 0.824699  
C -3.489994 0.559665 1.746816  
H -4.149179 0.093250 2.491975  
H -4.045053 1.342429 1.210565  
C -2.225364 1.111946 2.381641  
H -1.569649 1.583160 1.634033  
H -2.488443 1.872193 3.134394  
H -1.663378 0.309047 2.883628  
F -3.136506 -2.413736 -1.113371  
C 0.107834 1.717931 -1.097334  
C 1.785887 2.691911 0.183322  
C 2.451624 2.074923 -1.049460  
C 1.275440 1.970049 -2.033066  
H 0.022064 0.439216 -0.909354  
H -0.905018 1.983995 -1.424853  
H 1.824222 3.796521 0.161117  
H 2.225179 2.347505 1.131369  
H 3.282824 2.686961 -1.428131  
H 2.841991 1.075113 -0.810893  
H 1.132130 2.917645 -2.582729

H 1.400487 1.168356 -2.776742  
O 0.411258 2.287818 0.136034

0FA.xyz

C 2.217816 -0.466834 0.344452  
H 2.307063 -1.543150 0.498033  
C 0.953687 0.127025 -0.049084  
O 0.778690 1.318386 -0.231384  
O -0.018801 -0.804485 -0.195244  
C -1.318755 -0.330220 -0.575742  
H -1.809827 -1.199379 -1.036544  
H -1.204839 0.461461 -1.331812  
C -2.105552 0.178352 0.620665  
H -1.622233 1.066928 1.051778  
H -3.124504 0.458317 0.309180  
H -2.182212 -0.598501 1.397157  
H 3.074265 0.193176 0.483488

0F-Br.xyz

C 0.644728 0.840931 0.735164  
H 0.563319 0.523468 1.781673  
C -0.676435 0.680955 0.013635  
O -1.179994 1.543200 -0.662321  
O -1.207612 -0.527419 0.233419  
C -2.452138 -0.830638 -0.426198  
H -2.467035 -1.927199 -0.496052  
H -2.428146 -0.404232 -1.439843  
C -3.640856 -0.305254 0.358230  
H -3.626698 0.793711 0.394362  
H -4.578204 -0.620685 -0.126673  
H -3.635891 -0.697274 1.387017  
H 0.979424 1.879277 0.655330  
Br 2.029780 -0.285408 -0.080274

2FA.xyz

C 1.497495 -0.116147 0.164701  
C 0.163105 0.356266 -0.164612  
O -0.116330 1.533551 -0.257123  
O -0.689762 -0.674668 -0.300158  
C -2.067619 -0.339385 -0.551252  
H -2.487522 -1.240128 -1.019880  
H -2.106430 0.492209 -1.270506  
C -2.799358 0.015343 0.731001  
H -2.385319 0.933073 1.173121  
H -3.865648 0.188984 0.516164

|           |           |           |           |           |           |           |           |
|-----------|-----------|-----------|-----------|-----------|-----------|-----------|-----------|
| H         | -2.722733 | -0.801793 | 1.464643  | O         | 1.135812  | 1.182390  | 1.049818  |
| F         | 2.506606  | 0.714553  | 0.192105  | C         | 2.603823  | -0.954018 | 0.208659  |
| F         | 1.855022  | -1.374538 | 0.087415  | H         | 2.695198  | -2.021002 | -0.036221 |
| 2F-Br.xyz |           |           |           | H         | 2.527353  | -0.838433 | 1.299682  |
| C         | 0.573021  | 0.749068  | 0.228007  | H         | -0.514007 | 0.567697  | -1.646861 |
| C         | -0.787436 | 0.358416  | -0.389053 | C         | 3.763007  | -0.148763 | -0.348413 |
| O         | -1.180672 | 0.815302  | -1.426218 | H         | 3.668177  | 0.911486  | -0.072661 |
| O         | -1.398605 | -0.531446 | 0.380002  | H         | 4.711429  | -0.527207 | 0.064261  |
| C         | -2.680252 | -1.026095 | -0.073073 | H         | 3.806995  | -0.231136 | -1.445292 |
| H         | -2.781330 | -2.003573 | 0.417117  | nPrA.xyz  |           |           |           |
| H         | -2.633818 | -1.168712 | -1.162600 | C         | -3.301061 | -0.879430 | -0.038893 |
| C         | -3.803046 | -0.082711 | 0.314122  | H         | -3.270002 | -1.409544 | -1.003908 |
| H         | -3.699198 | 0.881844  | -0.203687 | C         | -2.205212 | 0.150925  | 0.009945  |
| H         | -4.771439 | -0.522463 | 0.028427  | O         | -2.346980 | 1.343518  | 0.080359  |
| H         | -3.809852 | 0.093020  | 1.400552  | O         | -0.980867 | -0.452552 | -0.046915 |
| F         | 1.026193  | 1.861506  | -0.340215 | C         | 0.149969  | 0.321426  | -0.059894 |
| F         | 0.466827  | 0.952169  | 1.544856  | H         | -4.272769 | -0.386945 | 0.082869  |
| Br        | 1.859398  | -0.710460 | -0.098053 | H         | -3.152319 | -1.632028 | 0.750070  |
| Br.xyz    |           |           |           | H         | 0.006324  | 1.387026  | 0.128408  |
| Br        | 0.000000  | 0.000000  | 0.000000  | C         | 1.428094  | -0.408289 | 0.123526  |
| FA.xyz    |           |           |           | H         | 1.497955  | -0.809492 | 1.159545  |
| C         | 1.709173  | -0.597949 | 0.167590  | H         | 1.434678  | -1.302176 | -0.528528 |
| H         | 1.819363  | -1.668135 | 0.353808  | C         | 2.654792  | 0.464103  | -0.160981 |
| C         | 0.466475  | 0.073261  | -0.164390 | H         | 2.620761  | 1.356533  | 0.488922  |
| O         | 0.351713  | 1.263365  | -0.372093 | H         | 2.595190  | 0.841363  | -1.196410 |
| O         | -0.542377 | -0.826324 | -0.211122 | C         | 3.974355  | -0.275102 | 0.049166  |
| C         | -1.849713 | -0.314466 | -0.518968 | H         | 4.838235  | 0.374331  | -0.161496 |
| H         | -2.400323 | -1.178335 | -0.917544 | H         | 4.070735  | -0.633859 | 1.087413  |
| H         | -1.757594 | 0.448311  | -1.306782 | H         | 4.048372  | -1.154732 | -0.611654 |
| C         | -2.531574 | 0.259251  | 0.711164  | Pr-Br.xyz |           |           |           |
| H         | -1.986981 | 1.140485  | 1.079911  | C         | 3.370445  | -1.270051 | -0.685683 |
| H         | -3.558102 | 0.570088  | 0.460002  | H         | 3.518334  | -0.517031 | -1.476049 |
| H         | -2.584201 | -0.490750 | 1.515448  | C         | 2.262770  | -0.811784 | 0.220330  |
| F         | 2.802998  | 0.129048  | 0.256500  | O         | 2.372056  | -0.451248 | 1.359623  |
| F-Br.xyz  |           |           |           | O         | 1.064559  | -0.846876 | -0.442183 |
| C         | -0.599708 | 0.734103  | -0.564253 | C         | -0.061507 | -0.339486 | 0.216412  |
| Br        | -1.893540 | -0.611638 | 0.074238  | H         | 3.095895  | -2.213078 | -1.180348 |
| F         | -1.054906 | 1.970190  | -0.305140 | H         | 4.295021  | -1.387861 | -0.108885 |
| C         | 0.731046  | 0.500384  | 0.148830  | C         | -1.295935 | -1.050972 | -0.292776 |
| O         | 1.349677  | -0.554391 | -0.385307 | H         | -1.379255 | -0.883683 | -1.379214 |
|           |           |           |           | H         | -1.098720 | -2.129774 | -0.154689 |
|           |           |           |           | C         | -2.592017 | -0.666988 | 0.418781  |

|    |           |           |           |
|----|-----------|-----------|-----------|
| H  | -2.775691 | 0.410257  | 0.278589  |
| H  | -2.467498 | -0.817622 | 1.505935  |
| C  | -3.791789 | -1.469268 | -0.081683 |
| H  | -4.715176 | -1.175170 | 0.440584  |
| H  | -3.953587 | -1.310865 | -1.160680 |
| H  | -3.648266 | -2.551164 | 0.075864  |
| H  | 0.070383  | -0.401957 | 1.303217  |
| Br | -0.165319 | 1.628978  | -0.121604 |

TS6.xyz

|   |           |           |           |
|---|-----------|-----------|-----------|
| C | 4.333121  | 0.432065  | 1.033186  |
| C | 3.123085  | -0.177874 | 1.222021  |
| C | 2.158935  | -0.286234 | 0.144476  |
| C | 2.543600  | 0.280673  | -1.132283 |
| C | 3.767096  | 0.888353  | -1.292759 |
| C | 4.676757  | 0.976902  | -0.225649 |
| H | 5.037095  | 0.500749  | 1.856190  |
| H | 2.858106  | -0.594860 | 2.189111  |
| H | 1.862224  | 0.220732  | -1.972778 |
| H | 4.034046  | 1.305199  | -2.258622 |
| H | 5.636935  | 1.459717  | -0.365823 |
| C | 0.955504  | -0.908363 | 0.358775  |
| C | -0.102416 | -1.057716 | -0.663102 |
| H | -0.065982 | -0.561325 | -1.623281 |
| C | -1.424234 | -1.574685 | -0.240413 |
| C | -2.166066 | -0.522910 | 0.605336  |
| O | -2.009096 | -0.431548 | 1.797863  |
| O | -2.885615 | 0.287340  | -0.154584 |
| C | -3.532009 | 1.380647  | 0.537330  |
| H | -2.761535 | 1.966755  | 1.044869  |
| H | -4.198566 | 0.960551  | 1.294587  |
| C | -4.277859 | 2.186367  | -0.500154 |
| H | -4.782291 | 3.025191  | -0.016355 |
| H | -3.589063 | 2.580660  | -1.250091 |
| H | -5.028639 | 1.570440  | -0.999407 |
| F | -2.178298 | -1.913171 | -1.315440 |
| H | 0.740307  | -1.321047 | 1.340108  |
| H | -1.313361 | -2.443912 | 0.373633  |

#### 4.6 Determination of the Quantum Yield

UV-visible spectra were performed on a Agilent Cary 8454 spectrophotometer. All spectra were recorded in a thermostated cell at 25°C. The quantum yield of the reaction was measured by chemical actinometry using a 20 W LEDs using potassium ferrioxalate following the procedure of existent literature [12-17].

**Preparation of an actinometer solution:** Potassium ferrioxalate trihydrate (0.7369 g, 1.5 mmol) was dissolved in 10.0 mL of 0.20 mol/L aqueous sulfuric acid to create a 0.15 mol/L solution of ferrioxalate, which was then kept in the dark.

**Preparation of a buffer solution:** 0.15 mol/L buffered solution of 1,10-phenanthroline was prepared by dissolving 1,10-phenanthroline (0.0811 g, 0.45 mmol) and sodium acetate (3.0618 g, 22.5 mmol) in 30 mL of 0.20 mol/L aqueous sulfuric acid.

**The actinometry measurements were done as follows:** 1.0 mL of the ferrioxalate solution was added to a reaction tube fitted with a stir bar. A 20 W blue LED was positioned 2 cm away from the sealed reaction tube. 3 mL of aqueous sulfuric acid and 4 mL of the buffered solution were added to the reaction tube following a 45 second radiation exposure. Following that, the solution



was let to rest for an hour to enable the resulting ferrous ions to fully react with 1,10-phenanthroline. 3.0 mL of 0.20 mol/L aqueous sulfuric acid were used to dilute an aliquot of 50  $\mu\text{L}$  of the final solution. Using a UV-Vis spectrophotometer, the absorbance of the resultant solution at 510 nm was measured in a cuvette ( $l = 1.0 \text{ cm}$ ). Additionally, a sample that had not been exposed to radiation was created, and its absorbance at 510 nm was assessed. the number of moles of  $\text{Fe}^{2+}$  produced by light irradiation was calculated as follows:

$$\text{moles of Fe}^{2+} = \frac{V_1 \times V_3 \times \Delta A (510 \text{ nm})}{10^3 \times V_2 \times l \times \varepsilon (510 \text{ nm})}$$

Where:

$V_1$  = Irradiated volume (1.0 mL).

$V_2$  = The aliquot of the irradiated solution taken for the estimation of  $[\text{Fe}]^+$  ions (0.050 mL).

$V_3$  = Final volume of the solution after complexation with 1,10-phenanthroline (8 mL).

$\varepsilon (510 \text{ nm})$  = Molar extinction coefficient of  $[\text{Fe}(\text{Phen})_3]^{2+}$  complex ( $11100 \text{ L mol}^{-1}\text{cm}^{-1}$ ).

$l$  = Optical path length of the cuvette (1.0 cm).

$\Delta A (510 \text{ nm})$  = absorbance difference between the irradiated solution and the solution stored in dark.

The photon flux was calculated as follows:

$$\text{photon flux} = \frac{\text{moles of Fe}^{2+}}{\Phi \times t \times f}$$

Where:

$\Phi$  = the quantum yield for the ferrioxalate actinometer (approximated as 0.845, which was reported for a 0.15 mol/L solution at  $\lambda = 457.9 \text{ nm}$ ).

$t$  = the irradiation time.

$f$  = the fraction of light absorbed at 450 nm.

The fraction of light absorbed was determined by the following equation:

$$f = 1.0000 - 10^{-A (450 \text{ nm})}$$

Where:

$A (450 \text{ nm})$  = the measured absorbance of the 0.15 mol/L solution of potassium ferrioxalate at 450 nm.

**The photon flux is  $9.21 \times 10^{-8}$  Einstein/s.**

### Determination of quantum yield:

To obtain the quantum yield ( $\Phi$ ) of the reaction. The number of moles of the product (**3**) were determined by  $^1\text{H}$  NMR analysis using 1,3-benzodioxole as internal standard and revealed 11% yield of **3** ( $2.26 \times 10^{-5} \text{ mol}$ ). As such, a photocatalytic reaction was performed under the set of optimized reaction conditions under visible light irradiation of 20 W LEDs (max = 450 nm).

After 3600 s of light irradiation.

The quantum yield was calculated as follows:

$$\Phi = \frac{\text{moles of product}}{\text{photon flux} \times t \times f}$$

Where:

photon flux = the photon flux determined by ferrioxalate actinometry ( $9.21 \times 10^{-8}$  Einstein/s.)

$t$  = the irradiation time.

$f$  = the fraction of light absorbed by the irradiated reaction system at 450 nm.

**The fraction of light absorbed at 450 nm was calculated:**

$$f = 1.0000 - 10^{-A (450 \text{ nm})} = 1.0000 - 10^{-3.1345} = 0.9993$$

The quantum yield was calculated:  $\Phi = 0.0682$

### 5. Characterization data of products

Ethyl (Z)-2-fluoro-4-phenylbut-3-enoate (**3**)

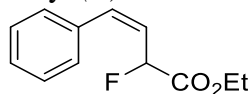

Purification by column chromatography over silica (n-pentane/ethyl acetate 80/1): 40.4 mg of colorless oil (97% yield) of *Z*-alkene/*E*-alkene mixture (93/7).

**<sup>1</sup>H NMR** (400 MHz, CDCl<sub>3</sub>)  $\delta$  7.50 – 7.30 (m, 5H), 7.06 – 6.90 (m, 1H), 5.83 (dt,  $J = 11.4, 9.9$  Hz, 1H), 5.64 (ddd,  $J = 47.9, 9.6, 1.0$  Hz, 1H), 4.30 (q,  $J = 7.1$  Hz, 2H), 1.33 (t,  $J = 7.1$  Hz, 3H).

**<sup>19</sup>F NMR** (376 MHz, Chloroform-*d*)  $\delta$  -174.65.

**<sup>13</sup>C NMR** (101 MHz, Chloroform-*d*)  $\delta$  168.9 (d,  $^2J_{C-F} = 26.4$  Hz), 138.1 (d,  $^3J_{C-F} = 10.5$  Hz), 135.0 (d,  $^4J_{C-F} = 3.0$  Hz), 128.9 (d,  $^5J_{C-F} = 2.7$  Hz), 128.5, 128.4, 123.0 (d,  $^2J_{C-F} = 20.3$  Hz), 84.4 (d,  $^1J_{C-F} = 177.5$  Hz), 62.0, 14.1.

Spectral Data was agreed with previously report.<sup>[18, 19]</sup>

Ethyl (Z)-2-fluoro-4-(*p*-tolyl)but-3-enoate (**4**)

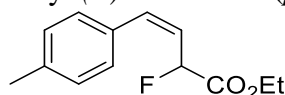

Purification by column chromatography over silica (n-pentane/ethyl acetate 80/1): 40.9 mg of colorless oil (92% yield) of *Z*-alkene/*E*-alkene mixture (93/7).

**<sup>1</sup>H NMR** (400 MHz, CDCl<sub>3</sub>)  $\delta$  7.31 (d,  $J = 8.1$  Hz, 2H), 7.20 (d,  $J = 8.0$  Hz, 2H), 6.95 (dd,  $J = 11.2, 3.7$  Hz, 1H), 5.82 – 5.56 (m, 2H), 4.30 (qd,  $J = 7.1, 0.9$  Hz, 2H), 2.37 (s, 3H), 1.33 (t,  $J = 7.1$  Hz, 3H).

**<sup>19</sup>F NMR** (376 MHz, Chloroform-*d*)  $\delta$  -174.20.

**<sup>13</sup>C NMR** (101 MHz, Chloroform-*d*)  $\delta$  169.1 (d,  $^2J_{C-F} = 26.6$  Hz), 138.5, 138.2 (d,  $^5J_{C-F} = 10.4$  Hz), 132.3 (d,  $^3J_{C-F} = 3.2$  Hz), 129.4, 129.0 (d,  $^4J_{C-F} = 2.8$  Hz), 122.5 (d,  $^2J_{C-F} = 20.3$  Hz), 84.7 (d,  $^1J_{C-F} = 177.3$  Hz), 62.0, 21.4, 14.2.

Spectral Data was agreed with previously report.<sup>[19, 20]</sup>

Ethyl (Z)-2-fluoro-4-(*m*-tolyl)but-3-enoate (**5**)

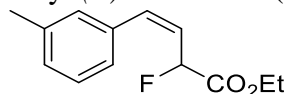

Purification by column chromatography over silica (n-pentane/ethyl acetate 80/1): 40.9 mg of colorless oil (92% yield) of *Z*-alkene/*E*-alkene mixture (97/3).

**<sup>1</sup>H NMR** (400 MHz, CDCl<sub>3</sub>)  $\delta$  7.28 (dd,  $J = 8.3, 7.4$  Hz, 1H), 7.23 – 7.20 (m, 2H), 7.16 (d,  $J = 7.5$  Hz, 1H), 6.95 (dd,  $J = 11.3, 3.7$  Hz, 1H), 5.81 (dt,  $J = 11.4, 9.9$  Hz, 1H), 5.65 (ddd,  $J = 47.8, 9.6, 0.9$  Hz, 1H), 4.30 (qd,  $J = 7.2, 2.6$  Hz, 2H), 2.37 (s, 3H), 1.33 (t,  $J = 7.1$  Hz, 3H).

**<sup>19</sup>F NMR** (376 MHz, Chloroform-*d*)  $\delta$  -174.46.

**<sup>13</sup>C NMR** (101 MHz, Chloroform-*d*)  $\delta$  169.1 (d,  $^2J_{C-F} = 26.5$  Hz), 138.4, 138.3 (d,  $^4J_{C-F} = 2.8$  Hz), 135.1 (d,  $^3J_{C-F} = 3.2$  Hz), 129.7 (d,  $^6J_{C-F} = 2.8$  Hz), 129.3, 128.5, 126.1 (d,  $^5J_{C-F} = 2.8$  Hz), 123.0 (d,  $^2J_{C-F} = 20.3$  Hz), 84.6 (d,  $^1J_{C-F} = 177.1$  Hz), 62.0, 21.5, 14.2.

Spectral Data was agreed with previously report.<sup>[19]</sup>

Ethyl (Z)-2-fluoro-4-(*o*-tolyl)but-3-enoate (**6**)

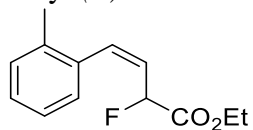

Purification by column chromatography over silica (n-pentane/ethyl acetate 80/1): 42.7 mg of colorless oil (96% yield) of *Z*-alkene/*E*-alkene mixture (92/8).

**<sup>1</sup>H NMR** (400 MHz, CDCl<sub>3</sub>) δ 7.37 – 7.32 (m, 1H), 7.28 – 7.17 (m, 3H), 7.02 (dd, *J* = 11.3, 3.6 Hz, 1H), 5.88 (ddd, *J* = 11.2, 9.8, 8.6 Hz, 1H), 5.47 (ddd, *J* = 48.1, 9.8, 0.9 Hz, 1H), 4.28 (q, *J* = 7.1 Hz, 2H), 2.29 (s, 3H), 1.32 (t, *J* = 7.1 Hz, 3H).

**<sup>19</sup>F NMR** (376 MHz, Chloroform-*d*) δ -176.33.

**<sup>13</sup>C NMR** (101 MHz, Chloroform-*d*) δ 169.1 (d, <sup>2</sup>*J*<sub>C-F</sub> = 26.4 Hz), 137.7 (d, <sup>5</sup>*J*<sub>C-F</sub> = 10.5 Hz), 136.7 (d, <sup>4</sup>*J*<sub>C-F</sub> = 2.5 Hz), 134.3 (d, <sup>3</sup>*J*<sub>C-F</sub> = 3.0 Hz), 130.1, 129.3 (d, <sup>6</sup>*J*<sub>C-F</sub> = 2.6 Hz), 128.6, 125.9, 123.5 (d, <sup>2</sup>*J*<sub>C-F</sub> = 20.1 Hz), 84.7 (d, <sup>1</sup>*J*<sub>C-F</sub> = 177.1 Hz), 62.0, 20.0, 14.2.

Spectral Data was agreed with previously report.<sup>[19, 20]</sup>

Ethyl (Z)-2-fluoro-4-(4-methoxyphenyl)but-3-enoate (**7**)

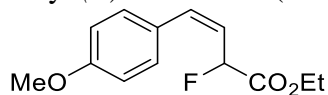

Purification by column chromatography over silica (n-pentane/ethyl acetate 80/1): 21.4 mg of colorless oil (45% yield) of *Z*-alkene/*E*-alkene mixture (92/8).

**<sup>1</sup>H NMR** (400 MHz, CDCl<sub>3</sub>) δ 7.36 (d, *J* = 8.7 Hz, 2H), 6.95 – 6.88 (m, 3H), 5.77 – 5.57 (m, 2H), 4.30 (qd, *J* = 7.2, 0.7 Hz, 2H), 3.83 (s, 3H), 1.33 (t, *J* = 7.1 Hz, 3H).

**<sup>19</sup>F NMR** (376 MHz, Chloroform-*d*) δ -173.67.

**<sup>13</sup>C NMR** (101 MHz, Chloroform-*d*) δ 169.0 (d, <sup>2</sup>*J*<sub>C-F</sub> = 26.7 Hz), 159.8, 137.7 (d, <sup>5</sup>*J*<sub>C-F</sub> = 10.4 Hz), 130.4 (d, <sup>4</sup>*J*<sub>C-F</sub> = 2.7 Hz), 127.6 (d, <sup>3</sup>*J*<sub>C-F</sub> = 3.2 Hz), 121.4 (d, <sup>2</sup>*J*<sub>C-F</sub> = 20.3 Hz), 114.0, 84.6 (d, <sup>1</sup>*J*<sub>C-F</sub> = 177.3 Hz), 61.9, 55.3, 14.1.

Spectral Data was agreed with previously report.<sup>[20]</sup>

Ethyl (Z)-2-fluoro-4-(3-methoxyphenyl)but-3-enoate (**8**)

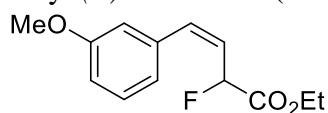

Purification by column chromatography over silica (n-pentane/ethyl acetate 80/1): 42.4 mg of colorless oil (89% yield) of *Z*-alkene/*E*-alkene mixture (93/7).

**<sup>1</sup>H NMR** (400 MHz, CDCl<sub>3</sub>) δ 7.33 – 7.27 (m, 1H), 7.01 – 6.93 (m, 3H), 6.92 – 6.87 (m, 1H), 5.82 (ddd, *J* = 11.4, 10.4, 9.5 Hz, 1H), 5.67 (ddd, *J* = 47.7, 9.7, 0.9 Hz, 1H), 4.31 (qd, *J* = 7.1, 1.0 Hz, 2H), 3.83 (s, 3H), 1.33 (t, *J* = 7.1 Hz, 3H).

**<sup>19</sup>F NMR** (376 MHz, Chloroform-*d*) δ -174.75.

**<sup>13</sup>C NMR** (101 MHz, Chloroform-*d*) δ 169.0 (d, <sup>2</sup>*J*<sub>C-F</sub> = 26.4 Hz), 159.8, 138.1 (d, <sup>3</sup>*J*<sub>C-F</sub> = 10.6 Hz), 136.4 (d, <sup>4</sup>*J*<sub>C-F</sub> = 3.2 Hz), 129.7, 123.4 (d, <sup>2</sup>*J*<sub>C-F</sub> = 20.6 Hz), 121.4 (d, <sup>5</sup>*J*<sub>C-F</sub> = 2.7 Hz), 114.4, 114.3 (d, <sup>5</sup>*J*<sub>C-F</sub> = 2.8 Hz), 84.6 (d, <sup>1</sup>*J*<sub>C-F</sub> = 177.4 Hz), 62.1, 55.4, 14.2.

Spectral Data was agreed with previously report.<sup>[20]</sup>

Ethyl (Z)-2-fluoro-4-(2-methoxyphenyl)but-3-enoate (**9**)

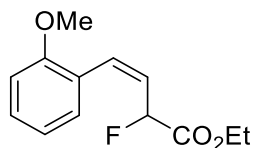

Purification by column chromatography over silica (n-pentane/ethyl acetate 80/1): 36.7 mg of colorless oil (77% yield) of *Z*-alkene/*E*-alkene mixture (96/4).

**<sup>1</sup>H NMR** (400 MHz, CDCl<sub>3</sub>) δ 8.06 (d, *J* = 8.0 Hz, 2H), 7.48 (d, *J* = 8.0 Hz, 2H), 6.99 (dd, *J* = 11.5, 3.5 Hz, 1H), 5.92 (dt, *J* = 11.8, 10.0 Hz, 1H), 5.59 (dd, *J* = 48.0, 9.6 Hz, 1H), 4.31 (qd, *J* = 7.1, 1.2 Hz, 2H), 3.93 (d, *J* = 1.0 Hz, 3H), 1.34 (td, *J* = 7.2, 1.0 Hz, 3H).

**<sup>19</sup>F NMR** (376 MHz, Chloroform-*d*) δ -174.50.

**<sup>13</sup>C NMR** (101 MHz, Chloroform-*d*) δ 168.6 (d, <sup>2</sup>*J*<sub>C-F</sub> = 26.1 Hz), 166.8, 139.6 (d, <sup>5</sup>*J*<sub>C-F</sub> = 3.0 Hz), 137.0 (d, <sup>3</sup>*J*<sub>C-F</sub> = 10.4 Hz), 130.1, 129.9, 129.0 (d, <sup>4</sup>*J*<sub>C-F</sub> = 2.7 Hz), 125.0 (d, <sup>2</sup>*J*<sub>C-F</sub> = 20.8 Hz), 84.4 (d, <sup>1</sup>*J*<sub>C-F</sub> = 178.4 Hz), 62.2, 52.4, 14.2.

Spectral Data was agreed with previously report.<sup>[20]</sup>

Ethyl (*Z*)-4-(3,5-dimethoxyphenyl)-2-fluorobut-3-enoate (**10**)

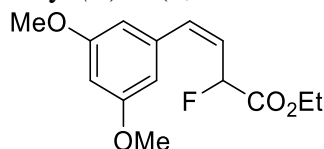

Purification by column chromatography over silica (n-pentane/ethyl acetate 80/1): 47.8 mg of colorless oil (89% yield) of *Z*-alkene/*E*-alkene mixture (95/5).

**<sup>1</sup>H NMR** (400 MHz, CDCl<sub>3</sub>) 6.92 (dd, *J* = 11.1, 3.5 Hz, 1H), 6.58 (d, *J* = 2.3 Hz, 2H), 6.46 (t, *J* = 2.3 Hz, 1H), 5.86 – 5.62 (m, 2H), 4.31 (qd, *J* = 7.2, 1.9 Hz, 2H), 3.81 (s, 6H), 1.33 (t, *J* = 7.1 Hz, 3H).

**<sup>19</sup>F NMR** (376 MHz, Chloroform-*d*) δ -174.82.

**<sup>13</sup>C NMR** (101 MHz, Chloroform-*d*) δ 168.9 (d, <sup>2</sup>*J*<sub>C-F</sub> = 26.3 Hz), 160.8, 138.0 (d, <sup>3</sup>*J*<sub>C-F</sub> = 10.6 Hz), 136.8 (d, <sup>4</sup>*J*<sub>C-F</sub> = 3.0 Hz), 123.4 (d, <sup>2</sup>*J*<sub>C-F</sub> = 20.8 Hz), 106.9 (d, <sup>5</sup>*J*<sub>C-F</sub> = 2.8 Hz), 100.7, 84.6 (d, <sup>1</sup>*J*<sub>C-F</sub> = 177.4 Hz), 62.0, 55.4, 14.1.

**HRMS (ESI)** Calcd for C<sub>14</sub>H<sub>18</sub>FO<sub>4</sub> [M+H]<sup>+</sup>: 269.1184, found 269.1183.

Ethyl (*Z*)-4-(4-ethylphenyl)-2-fluorobut-3-enoate (**11**)

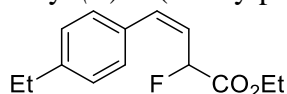

Purification by column chromatography over silica (n-pentane/ethyl acetate 80/1): 44.0 mg of colorless oil (93% yield) of *Z*-alkene/*E*-alkene mixture (94/6).

**<sup>1</sup>H NMR** (400 MHz, CDCl<sub>3</sub>) δ 7.36 – 7.31 (m, 2H), 7.22 (d, *J* = 8.1 Hz, 2H), 6.95 (dd, *J* = 11.2, 3.7 Hz, 1H), 5.77 (dd, *J* = 11.3, 9.9 Hz, 1H), 5.74 – 5.59 (m, 1H), 4.30 (qd, *J* = 7.1, 0.8 Hz, 2H), 2.67 (q, *J* = 7.6 Hz, 2H), 1.33 (t, *J* = 7.2 Hz, 3H), 1.25 (t, *J* = 7.6 Hz, 3H).

**<sup>19</sup>F NMR** (376 MHz, Chloroform-*d*) δ -174.14.

**<sup>13</sup>C NMR** (101 MHz, Chloroform-*d*) δ 169.0 (d, <sup>2</sup>*J*<sub>C-F</sub> = 26.6 Hz), 144.7, 138.1 (d, <sup>5</sup>*J*<sub>C-F</sub> = 10.5 Hz), 132.4 (d, <sup>3</sup>*J*<sub>C-F</sub> = 3.3 Hz), 129.0 (d, <sup>4</sup>*J*<sub>C-F</sub> = 2.7 Hz), 128.1, 122.3 (d, <sup>2</sup>*J*<sub>C-F</sub> = 20.2 Hz), 84.5 (d, <sup>1</sup>*J*<sub>C-F</sub> = 177.2 Hz), 61.9, 28.6, 15.5, 14.1.

**HRMS (ESI)** Calcd for C<sub>14</sub>H<sub>17</sub>FO<sub>2</sub>Na [M+Na]<sup>+</sup>: 259.1105, found 259.1102.

Ethyl (Z)-2-fluoro-4-(4-isopropylphenyl)but-3-enoate (**12**)

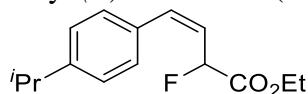

Purification by column chromatography over silica (n-pentane/ethyl acetate 80/1): 46.1 mg of colorless oil (92% yield) of *Z*-alkene/*E*-alkene mixture (95/5).

**<sup>1</sup>H NMR** (400 MHz, CDCl<sub>3</sub>) δ 7.37 – 7.32 (m, 2H), 7.28 – 7.23 (m, 2H), 6.95 (dd, *J* = 11.1, 3.7 Hz, 1H), 5.83 – 5.59 (m, 2H), 4.34 – 4.26 (m, 2H), 2.93 (p, *J* = 6.9 Hz, 1H), 1.33 (t, *J* = 7.1 Hz, 3H), 1.26 (d, *J* = 7.0 Hz, 6H).

**<sup>19</sup>F NMR** (376 MHz, Chloroform-*d*) δ -174.08.

**<sup>13</sup>C NMR** (101 MHz, Chloroform-*d*) δ 169.0 (d, <sup>2</sup>*J*<sub>C-F</sub> = 26.4 Hz), 149.3, 138.1 (d, <sup>5</sup>*J*<sub>C-F</sub> = 10.6 Hz), 132.6 (d, <sup>3</sup>*J*<sub>C-F</sub> = 3.3 Hz), 129.0 (d, <sup>4</sup>*J*<sub>C-F</sub> = 2.7 Hz), 126.6, 122.3 (d, <sup>2</sup>*J*<sub>C-F</sub> = 20.3 Hz), 84.5 (d, <sup>1</sup>*J*<sub>C-F</sub> = 177.1 Hz), 61.9, 33.9, 23.9, 14.1.

**HRMS (ESI)** Calcd for C<sub>15</sub>H<sub>19</sub>FO<sub>2</sub>Na [M+Na]<sup>+</sup>: 273.1261, found 273.1259.

Ethyl (Z)-4-(4-butylphenyl)-2-fluorobut-3-enoate (**13**)

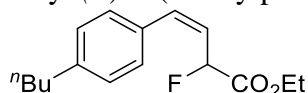

Purification by column chromatography over silica (n-pentane/ethyl acetate 80/1): 46.5 mg of colorless oil (88% yield) of *Z*-alkene/*E*-alkene mixture (93/7).

**<sup>1</sup>H NMR** (400 MHz, CDCl<sub>3</sub>) δ 7.33 (d, *J* = 8.1 Hz, 2H), 7.20 (d, *J* = 8.1 Hz, 2H), 6.95 (dd, *J* = 11.1, 3.7 Hz, 1H), 5.87 – 5.56 (m, 2H), 4.30 (qd, *J* = 7.1, 0.8 Hz, 2H), 2.66 – 2.59 (m, 2H), 1.60 (ddt, *J* = 8.3, 7.0, 1.7 Hz, 2H), 1.34 (dt, *J* = 9.4, 7.3 Hz, 5H), 0.93 (t, *J* = 7.4 Hz, 3H).

**<sup>19</sup>F NMR** (376 MHz, Chloroform-*d*) δ -174.08.

**<sup>13</sup>C NMR** (101 MHz, Chloroform-*d*) δ 169.1 (d, <sup>2</sup>*J*<sub>C-F</sub> = 26.5 Hz), 143.6, 138.3 (d, <sup>3</sup>*J*<sub>C-F</sub> = 10.5 Hz), 132.5 (d, <sup>4</sup>*J*<sub>C-F</sub> = 3.2 Hz), 129.0 (d, <sup>6</sup>*J*<sub>C-F</sub> = 2.7 Hz), 128.7, 122.4 (d, <sup>2</sup>*J*<sub>C-F</sub> = 20.3 Hz), 84.7 (d, <sup>1</sup>*J*<sub>C-F</sub> = 177.2 Hz), 62.0, 35.5, 33.6, 22.5, 14.2, 14.1.

**HRMS (ESI)** Calcd for C<sub>16</sub>H<sub>21</sub>FO<sub>2</sub>Na [M+Na]<sup>+</sup>: 287.1418, found 287.1413.

Ethyl (Z)-4-(4-(*tert*-butyl)phenyl)-2-fluorobut-3-enoate (**14**)

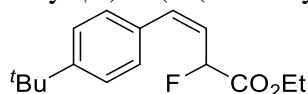

Purification by column chromatography over silica (n-pentane/ethyl acetate 80/1): 46.0 mg of colorless oil (87% yield) of *Z*-alkene/*E*-alkene mixture (95/5).

**<sup>1</sup>H NMR** (400 MHz, CDCl<sub>3</sub>) δ 7.42 (d, *J* = 8.5 Hz, 2H), 7.36 (d, *J* = 8.4 Hz, 2H), 6.95 (dd, *J* = 11.1, 3.7 Hz, 1H), 5.83 – 5.57 (m, 2H), 4.30 (q, *J* = 7.1 Hz, 2H), 1.33 (s, 12H).

**<sup>19</sup>F NMR** (376 MHz, Chloroform-*d*) δ -174.08.

**<sup>13</sup>C NMR** (101 MHz, Chloroform-*d*) δ 169.0 (d, <sup>2</sup>*J*<sub>C-F</sub> = 26.5 Hz), 151.6, 138.0 (d, <sup>3</sup>*J*<sub>C-F</sub> = 10.5 Hz), 132.2 (d, <sup>4</sup>*J*<sub>C-F</sub> = 3.2 Hz), 128.8 (d, <sup>6</sup>*J*<sub>C-F</sub> = 2.8 Hz), 125.5, 122.4 (d, <sup>2</sup>*J*<sub>C-F</sub> = 20.3 Hz), 84.5 (d, <sup>1</sup>*J*<sub>C-F</sub> = 177.1 Hz), 61.9, 34.7, 31.3, 14.1.

Spectral Data agreed with previously reported. <sup>[19, 20]</sup>

Ethyl (Z)-4-(4-(((*tert*-butoxycarbonyl)amino)methyl)phenyl)-2-fluorobut-3-enoate (**15**)

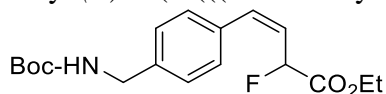

Purification by column chromatography over silica (n-pentane/ethyl acetate 80/1): 52.6 mg of colorless oil (78% yield) of *Z*-alkene/*E*-alkene mixture (96/4).

**<sup>1</sup>H NMR** (400 MHz, CDCl<sub>3</sub>) δ 7.37 (d, *J* = 8.1 Hz, 2H), 7.31 (d, *J* = 8.0 Hz, 2H), 6.95 (dd, *J* = 11.4, 3.6 Hz, 1H), 5.82 (dt, *J* = 11.4, 9.9 Hz, 1H), 5.61 (ddd, *J* = 47.9, 9.6, 1.0 Hz, 1H), 4.89 (s, 1H), 4.31 (dt, *J* = 14.3, 6.4 Hz, 4H), 1.47 (s, 9H), 1.33 (t, *J* = 7.1 Hz, 3H).

**<sup>19</sup>F NMR** (376 MHz, Chloroform-*d*) δ -174.68.

**<sup>13</sup>C NMR** (101 MHz, Chloroform-*d*) δ 169.0 (d, <sup>2</sup>*J*<sub>C-F</sub> = 26.5 Hz), 155.9, 139.4, 137.7 (d, <sup>3</sup>*J*<sub>C-F</sub> = 10.4 Hz), 134.0 (d, <sup>4</sup>*J*<sub>C-F</sub> = 3.3 Hz), 129.2 (d, <sup>5</sup>*J*<sub>C-F</sub> = 2.8 Hz), 127.5, 123.0 (d, <sup>2</sup>*J*<sub>C-F</sub> = 20.3 Hz), 84.4 (d, <sup>1</sup>*J*<sub>C-F</sub> = 177.5 Hz), 79.7, 62.0, 44.3, 28.4, 14.1.

**HRMS (ESI)** Calcd for C<sub>18</sub>H<sub>24</sub>FO<sub>4</sub>Na [M+Na]<sup>+</sup>: 360.1582, found 360.1576.

Ethyl (*Z*)-4-(4-(9H-carbazol-9-yl)phenyl)-2-fluorobut-3-enoate (**16**)

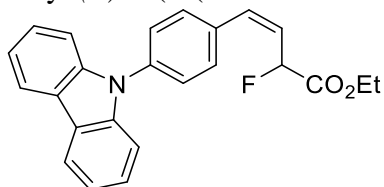

Purification by column chromatography over silica (n-pentane/ethyl acetate 80/1): 64.9 mg of colorless oil (87% yield) of *Z*-alkene/*E*-alkene mixture (96/4).

**<sup>1</sup>H NMR** (400 MHz, CDCl<sub>3</sub>) δ 8.26 – 8.09 (m, 2H), 7.67 – 7.57 (m, 4H), 7.52 – 7.34 (m, 5H), 7.29 (ddd, *J* = 8.0, 6.5, 1.6 Hz, 2H), 7.04 (dd, *J* = 11.4, 3.6 Hz, 1H), 5.93 (dddd, *J* = 11.5, 10.5, 9.6, 1.7 Hz, 1H), 5.76 (ddt, *J* = 47.8, 9.5, 1.5 Hz, 1H), 4.33 (qd, *J* = 7.2, 1.5 Hz, 2H), 1.35 (dd, *J* = 14.4, 1.5 Hz, 3H).

**<sup>19</sup>F NMR** (376 MHz, Chloroform-*d*) δ -174.45.

**<sup>13</sup>C NMR** (101 MHz, Chloroform-*d*) δ 168.9 (d, <sup>2</sup>*J*<sub>C-F</sub> = 26.3 Hz), 140.8, 138.0, 137.2 (d, <sup>3</sup>*J*<sub>C-F</sub> = 10.5 Hz), 134.1 (d, <sup>4</sup>*J*<sub>C-F</sub> = 3.0 Hz), 130.6 (d, <sup>5</sup>*J*<sub>C-F</sub> = 2.7 Hz), 127.1, 126.2, 123.9 (d, <sup>2</sup>*J*<sub>C-F</sub> = 20.5 Hz), 123.7, 120.5, 120.1, 109.9, 84.5 (d, <sup>1</sup>*J*<sub>C-F</sub> = 178.4 Hz), 62.2, 14.3.

**HRMS (ESI)** Calcd for C<sub>24</sub>H<sub>21</sub>FNO<sub>2</sub> [M+H]<sup>+</sup>: 374.1551, found 374.1550.

Ethyl (*Z*)-2-fluoro-3-methyl-4-phenylbut-3-enoate (**17**)

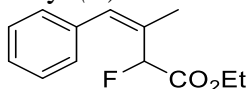

Purification by column chromatography over silica (n-pentane/ethyl acetate 80/1): 24.5 mg of colorless oil (55% yield) of *Z*-alkene/*E*-alkene mixture (89/11).

**<sup>1</sup>H NMR** (400 MHz, CDCl<sub>3</sub>) δ 7.39 – 7.27 (m, 5H), 6.78 (t, *J* = 1.8 Hz, 1H), 5.72 (d, *J* = 48.0 Hz, 1H), 4.31 (q, *J* = 7.1 Hz, 2H), 1.92 (t, *J* = 1.5 Hz, 3H), 1.34 (t, *J* = 7.1 Hz, 3H).

**<sup>19</sup>F NMR** (376 MHz, Chloroform-*d*) δ -183.79.

**<sup>13</sup>C NMR** (101 MHz, Chloroform-*d*) δ 169.0 (d, <sup>2</sup>*J*<sub>C-F</sub> = 26.9 Hz), 136.0 (d, <sup>4</sup>*J*<sub>C-F</sub> = 2.7 Hz), 134.4 (d, <sup>3</sup>*J*<sub>C-F</sub> = 8.4 Hz), 130.9 (d, <sup>2</sup>*J*<sub>C-F</sub> = 18.2 Hz), 128.9 (d, <sup>5</sup>*J*<sub>C-F</sub> = 2.2 Hz), 128.6, 127.7, 86.2 (d, <sup>1</sup>*J*<sub>C-F</sub> = 179.8 Hz), 62.0, 18.1 (d, <sup>3</sup>*J*<sub>C-F</sub> = 2.9 Hz), 14.3.

**HRMS (ESI)** Calcd for C<sub>13</sub>H<sub>16</sub>FO<sub>2</sub> [M+H]<sup>+</sup>: 223.1129, found 223.1129.

Ethyl (*Z*)-4-([1,1'-biphenyl]-4-yl)-2-fluorobut-3-enoate (**18**)

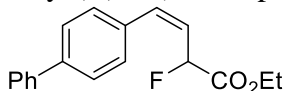

Purification by column chromatography over silica (n-pentane/ethyl acetate 80/1): 49.5 mg of colorless oil (87% yield) of *Z*-alkene/*E*-alkene mixture (91/9).

**<sup>1</sup>H NMR** (400 MHz, CDCl<sub>3</sub>) δ 7.67 – 7.57 (m, 4H), 7.49 (d, *J* = 8.1 Hz, 2H), 7.45 (t, *J* = 7.7 Hz, 2H), 7.39 – 7.34 (m, 1H), 7.01 (dd, *J* = 11.4, 3.7 Hz, 1H), 5.85 (dt, *J* = 11.3, 9.9 Hz, 1H), 5.71 (dd, *J* = 47.9, 9.6 Hz, 1H), 4.32 (q, *J* = 7.1 Hz, 2H), 1.34 (t, *J* = 7.1 Hz, 3H).

**<sup>19</sup>F NMR** (376 MHz, Chloroform-*d*) δ -174.40.

**<sup>13</sup>C NMR** (101 MHz, Chloroform-*d*) δ 167.9 (d, <sup>2</sup>*J*<sub>C-F</sub> = 26.3 Hz), 140.2, 139.4, 136.7 (d, <sup>3</sup>*J*<sub>C-F</sub> = 10.4 Hz), 132.9 (d, <sup>4</sup>*J*<sub>C-F</sub> = 3.1 Hz), 128.4 (d, <sup>6</sup>*J*<sub>C-F</sub> = 2.7 Hz), 127.8, 126.6, 126.2, 126.0, 122.1 (d, <sup>2</sup>*J*<sub>C-F</sub> = 20.4 Hz), 83.5 (d, <sup>1</sup>*J*<sub>C-F</sub> = 177.6 Hz), 61.0, 13.1.

Spectral Data was agreed with previously report.<sup>[20, 21]</sup>

Ethyl (*Z*)-2-fluoro-4-(4-fluorophenyl)but-3-enoate (**19**)

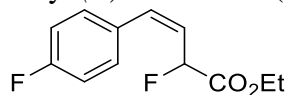

Purification by column chromatography over silica (n-pentane/ethyl acetate 80/1): 36.2 mg of colorless oil (80% yield) of *Z*-alkene/*E*-alkene mixture (93/7).

**<sup>1</sup>H NMR** (400 MHz, CDCl<sub>3</sub>) δ 7.40 (dd, *J* = 8.5, 5.5 Hz, 2H), 7.14 – 7.03 (m, 2H), 6.93 (dd, *J* = 11.4, 3.6 Hz, 1H), 5.82 (dt, *J* = 11.4, 9.9 Hz, 1H), 5.59 (ddd, *J* = 48.1, 9.6, 1.1 Hz, 1H), 4.31 (q, *J* = 7.1 Hz, 2H), 1.33 (t, *J* = 7.1 Hz, 3H).

**<sup>19</sup>F NMR** (376 MHz, Chloroform-*d*) δ -112.78, -174.79.

**<sup>13</sup>C NMR** (101 MHz, Chloroform-*d*) δ 168.7 (d, <sup>2</sup>*J*<sub>C-F</sub> = 26.3 Hz), 162.8 (d, <sup>1</sup>*J*<sub>C-F</sub> = 248.5 Hz), 136.9 (d, <sup>3</sup>*J*<sub>C-F</sub> = 10.5 Hz), 131.1 (t, <sup>4</sup>*J*<sub>C-F</sub> = 3.3 Hz), 130.7 (dd, <sup>3</sup>*J*<sub>C-F</sub> = 8.2, 2.8 Hz), 123.1 (d, <sup>2</sup>*J*<sub>C-F</sub> = 20.4 Hz), 115.6 (d, <sup>2</sup>*J*<sub>C-F</sub> = 21.5 Hz), 84.3 (d, <sup>1</sup>*J*<sub>C-F</sub> = 178.1 Hz), 62.0, 14.1.

Spectral Data was agreed with previously report.<sup>[19, 20]</sup>

Ethyl (*Z*)-2-fluoro-4-(3-fluorophenyl)but-3-enoate (**20**)

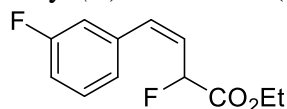

Purification by column chromatography over silica (n-pentane/ethyl acetate 80/1): 39.8 mg of colorless oil (88% yield) of *Z*-alkene/*E*-alkene mixture (93/7).

**<sup>1</sup>H NMR** (400 MHz, CDCl<sub>3</sub>) δ 7.36 (td, *J* = 8.0, 5.9 Hz, 1H), 7.21 – 7.13 (m, 2H), 7.05 (td, *J* = 8.3, 2.6, 1.0 Hz, 1H), 6.93 (dd, *J* = 11.5, 3.5 Hz, 1H), 5.91 – 5.81 (m, 1H), 5.61 (ddd, *J* = 47.9, 9.5, 1.0 Hz, 1H), 4.31 (qd, *J* = 7.2, 0.9 Hz, 2H), 1.34 (t, *J* = 7.1 Hz, 3H).

**<sup>19</sup>F NMR** (376 MHz, Chloroform-*d*) δ -112.62, -175.58.

**<sup>13</sup>C NMR** (101 MHz, Chloroform-*d*) δ 168.7 (d, <sup>2</sup>*J*<sub>C-F</sub> = 26.2 Hz), 162.9 (d, <sup>1</sup>*J*<sub>C-F</sub> = 246.6 Hz), 137.2 (dd, <sup>3</sup>*J*<sub>C-F</sub> = 7.8, 3.2 Hz), 136.8 (dd, <sup>3</sup>*J*<sub>C-F</sub> = 10.6, 2.2 Hz), 130.2 (d, <sup>3</sup>*J*<sub>C-F</sub> = 8.3 Hz), 124.8 (t, <sup>4</sup>*J*<sub>C-F</sub> = 2.8 Hz), 124.3 (d, <sup>2</sup>*J*<sub>C-F</sub> = 20.7 Hz), 115.9 (dd, <sup>2</sup>*J*<sub>C-F</sub> = 22.1, 2.7 Hz), 115.5 (d, <sup>2</sup>*J*<sub>C-F</sub> = 21.2 Hz), 84.4 (d, <sup>1</sup>*J*<sub>C-F</sub> = 178.0 Hz), 62.2, 14.2.

Spectral Data was agreed with previously report.<sup>[19]</sup>

Ethyl (*Z*)-2-fluoro-4-(2-fluorophenyl)but-3-enoate (**21**)

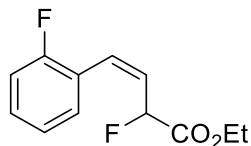

Purification by column chromatography over silica (n-pentane/ethyl acetate 80/1): 41.6 mg of colorless oil (92% yield) of *Z*-alkene/*E*-alkene mixture (97/3).

**<sup>1</sup>H NMR** (400 MHz, CDCl<sub>3</sub>) δ 7.50 (td, *J* = 7.6, 1.8 Hz, 1H), 7.34 (tdd, *J* = 7.5, 5.2, 1.8 Hz, 1H), 7.17 (td, *J* = 7.5, 1.2 Hz, 1H), 7.09 (ddd, *J* = 9.7, 8.2, 1.2 Hz, 1H), 7.04 – 6.99 (m, 1H), 5.94 (dt, *J* = 11.5, 9.8 Hz, 1H), 5.57 (ddd, *J* = 48.0, 9.5, 1.1 Hz, 1H), 4.29 (q, *J* = 7.1 Hz, 2H), 1.32 (t, *J* = 7.1 Hz, 3H).

**<sup>19</sup>F NMR** (376 MHz, Chloroform-*d*) δ -114.23, -176.31.

**<sup>13</sup>C NMR** (101 MHz, Chloroform-*d*) δ 168.7 (d, <sup>2</sup>*J*<sub>C-F</sub> = 26.1 Hz), 162.1 – 158.7 (m), 131.0 (dd, <sup>3</sup>*J*<sub>C-F</sub> = 10.5, 4.1 Hz), 130.8 (t, <sup>4</sup>*J*<sub>C-F</sub> = 2.8 Hz), 130.5 (d, <sup>3</sup>*J*<sub>C-F'</sub> = 8.2 Hz), 125.0 (d, <sup>2</sup>*J*<sub>C-F</sub> = 20.6 Hz), 124.2 (d, <sup>3</sup>*J*<sub>C-F'</sub> = 3.8 Hz), 123.0 (dd, <sup>2</sup>*J*<sub>C-F'</sub> = 14.1, 3.1 Hz), 115.7 (d, <sup>2</sup>*J*<sub>C-F</sub> = 21.4 Hz), 84.7 (d, <sup>1</sup>*J*<sub>C-F</sub> = 178.0 Hz), 62.2, 14.2.

Spectral Data was agreed with previously report.<sup>[19]</sup>

#### Ethyl (*Z*)-4-(4-chlorophenyl)-2-fluorobut-3-enoate (**22**)

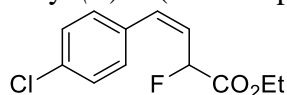

Purification by column chromatography over silica (n-pentane/ethyl acetate 80/1): 41.3 mg of colorless oil (85% yield) of *Z*-alkene/*E*-alkene mixture (95/5).

**<sup>1</sup>H NMR** (400 MHz, CDCl<sub>3</sub>) δ 7.40 – 7.31 (m, 4H), 6.94 – 6.87 (m, 1H), 5.85 (ddd, *J* = 11.4, 10.3, 9.6 Hz, 1H), 5.57 (ddd, *J* = 47.9, 9.6, 1.0 Hz, 1H), 4.31 (q, *J* = 7.1 Hz, 2H), 1.33 (t, *J* = 7.1 Hz, 3H).

**<sup>19</sup>F NMR** (376 MHz, Chloroform-*d*) δ -175.09.

**<sup>13</sup>C NMR** (101 MHz, Chloroform-*d*) δ 168.2 (d, <sup>2</sup>*J*<sub>C-F</sub> = 25.9 Hz), 139.5 (d, <sup>3</sup>*J*<sub>C-F</sub> = 3.1 Hz), 135.9 (d, <sup>4</sup>*J*<sub>C-F</sub> = 10.2 Hz), 134.0, 132.3, 129.5 (d, <sup>5</sup>*J*<sub>C-F</sub> = 2.8 Hz), 125.9 (d, <sup>2</sup>*J*<sub>C-F</sub> = 20.7 Hz), 118.43, 112.16, 84.1 (d, <sup>1</sup>*J*<sub>C-F</sub> = 179.6 Hz), 62.2, 14.1

Spectral Data was agreed with previously report.<sup>[20]</sup>

#### Ethyl (*Z*)-4-(2-chlorophenyl)-2-fluorobut-3-enoate (**23**)

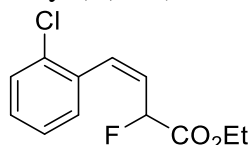

Purification by column chromatography over silica (n-pentane/ethyl acetate 80/1): 43.7 mg of colorless oil (90% yield) of *Z*-alkene/*E*-alkene mixture (98/2).

**<sup>1</sup>H NMR** (400 MHz, CDCl<sub>3</sub>) δ 7.53 – 7.47 (m, 1H), 7.45 – 7.40 (m, 1H), 7.33 – 7.27 (m, 2H), 7.07 (ddd, *J* = 11.4, 3.4, 1.0 Hz, 1H), 5.94 (dt, *J* = 11.4, 9.5 Hz, 1H), 5.49 (ddd, *J* = 47.9, 9.6, 1.0 Hz, 1H), 4.29 (q, *J* = 7.1 Hz, 2H), 1.33 (t, *J* = 7.2 Hz, 3H).

**<sup>19</sup>F NMR** (376 MHz, Chloroform-*d*) δ -176.53.

**<sup>13</sup>C NMR** (101 MHz, Chloroform-*d*) δ 168.6 (d, <sup>2</sup>*J*<sub>C-F</sub> = 26.1 Hz), 135.3 (d, <sup>5</sup>*J*<sub>C-F</sub> = 10.5 Hz), 133.9 (d, <sup>3</sup>*J*<sub>C-F</sub> = 2.9 Hz), 133.4 (d, <sup>4</sup>*J*<sub>C-F</sub> = 2.9 Hz), 130.8 (d, <sup>6</sup>*J*<sub>C-F</sub> = 2.8 Hz), 129.8, 129.6, 126.7, 124.4 (d, <sup>2</sup>*J*<sub>C-F</sub> = 20.5 Hz), 84.5 (d, <sup>1</sup>*J*<sub>C-F</sub> = 178.2 Hz), 62.0, 14.1.



Spectral Data was agreed with previously report.<sup>[20]</sup>

Ethyl (Z)-4-(4-bromophenyl)-2-fluorobut-3-enoate (**24**)

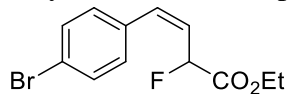

Purification by column chromatography over silica (n-pentane/ethyl acetate 80/1): 51.1 mg of colorless oil (89% yield) of *Z*-alkene/*E*-alkene mixture (95/5).

**<sup>1</sup>H NMR** (400 MHz, CDCl<sub>3</sub>) δ 7.57 – 7.49 (m, 2H), 7.32 – 7.27 (m, 2H), 6.90 (dd, *J* = 11.4, 3.5 Hz, 1H), 5.85 (ddd, *J* = 11.4, 10.2, 9.5 Hz, 1H), 5.57 (ddd, *J* = 48.0, 9.6, 1.0 Hz, 1H), 4.30 (q, *J* = 7.1 Hz, 2H), 1.33 (t, *J* = 7.1 Hz, 3H).

**<sup>19</sup>F NMR** (376 MHz, Chloroform-*d*) δ -175.15.

**<sup>13</sup>C NMR** (101 MHz, Chloroform-*d*) δ 168.6 (d, <sup>2</sup>*J*<sub>C-F</sub> = 26.1 Hz), 136.8 (d, <sup>5</sup>*J*<sub>C-F</sub> = 10.4 Hz), 133.8 (d, <sup>3</sup>*J*<sub>C-F</sub> = 3.2 Hz), 131.7, 130.5 (d, <sup>4</sup>*J*<sub>C-F</sub> = 2.8 Hz), 123.8 (d, <sup>2</sup>*J*<sub>C-F</sub> = 20.5 Hz), 122.7, 84.3 (d, <sup>1</sup>*J*<sub>C-F</sub> = 178.4 Hz), 62.1, 14.1.

Spectral Data was agreed with previously report.<sup>[19, 20]</sup>

Methyl (Z)-4-(4-ethoxy-3-fluoro-4-oxobut-1-en-1-yl)benzoate (**25**)

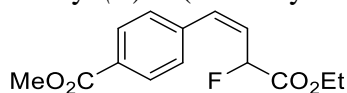

Purification by column chromatography over silica (n-pentane/ethyl acetate 80/1): 46.9 mg of colorless oil (88% yield) of *Z*-alkene/*E*-alkene mixture (97/3).

**<sup>1</sup>H NMR** (400 MHz, CDCl<sub>3</sub>) δ 8.09 – 8.00 (m, 2H), 7.51 – 7.44 (m, 2H), 7.00 (dd, *J* = 11.5, 3.5 Hz, 1H), 5.92 (dt, *J* = 11.5, 9.9 Hz, 1H), 5.59 (ddd, *J* = 47.9, 9.6, 1.0 Hz, 1H), 4.35 – 4.28 (m, 2H), 3.94 (s, 3H), 1.34 (t, *J* = 7.1 Hz, 3H).

**<sup>19</sup>F NMR** (376 MHz, Chloroform-*d*) δ -175.63.

**<sup>13</sup>C NMR** (101 MHz, Chloroform-*d*) δ 168.7 (d, <sup>2</sup>*J*<sub>C-F</sub> = 26.4 Hz), 166.8, 136.9 (d, <sup>3</sup>*J*<sub>C-F</sub> = 10.5 Hz), 135.4 (d, <sup>4</sup>*J*<sub>C-F</sub> = 3.1 Hz), 133.3 (d, <sup>5</sup>*J*<sub>C-F</sub> = 2.7 Hz), 130.7, 130.1 (d, <sup>7</sup>*J*<sub>C-F</sub> = 2.7 Hz), 129.6, 128.8, 124.4 (d, <sup>2</sup>*J*<sub>C-F</sub> = 20.9 Hz), 84.4 (d, <sup>1</sup>*J*<sub>C-F</sub> = 177.8 Hz), 62.2, 52.4, 14.2.

**HRMS (ESI)** Calcd for C<sub>14</sub>H<sub>16</sub>FO<sub>4</sub> [M+H]<sup>+</sup>: 267.1027, found 267.1028.

Methyl (Z)-3-(4-ethoxy-3-fluoro-4-oxobut-1-en-1-yl)benzoate (**26**)

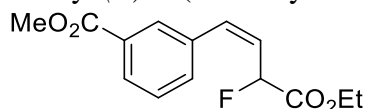

Purification by column chromatography over silica (n-pentane/ethyl acetate 80/1): 50.1 mg of colorless oil (94% yield) of *Z*-alkene/*E*-alkene mixture (98/2).

**<sup>1</sup>H NMR** (400 MHz, CDCl<sub>3</sub>) δ 8.10 (d, *J* = 1.8 Hz, 1H), 8.03 (dt, *J* = 7.8, 1.4 Hz, 1H), 7.61 (ddd, *J* = 7.8, 2.0, 1.1 Hz, 1H), 7.48 (t, *J* = 7.7 Hz, 1H), 6.99 (dd, *J* = 11.5, 3.4 Hz, 1H), 5.90 (ddd, *J* = 11.4, 10.6, 9.6 Hz, 1H), 5.60 (ddd, *J* = 47.9, 9.6, 1.1 Hz, 1H), 4.32 (tq, *J* = 7.1, 3.9 Hz, 2H), 3.94 (s, 3H), 1.35 (t, *J* = 7.2 Hz, 3H).

**<sup>19</sup>F NMR** (376 MHz, Chloroform-*d*) δ -175.69.

**<sup>13</sup>C NMR** (101 MHz, Chloroform-*d*) δ 168.6 (d, <sup>2</sup>*J*<sub>C-F</sub> = 26.4 Hz), 166.7, 136.8 (d, <sup>3</sup>*J*<sub>C-F</sub> = 10.4 Hz), 135.3 (d, <sup>4</sup>*J*<sub>C-F</sub> = 3.1 Hz), 133.2 (d, <sup>5</sup>*J*<sub>C-F</sub> = 2.7 Hz), 130.6, 130.0 (d, <sup>7</sup>*J*<sub>C-F</sub> = 2.7 Hz), 129.5, 128.7, 124.2 (d, <sup>2</sup>*J*<sub>C-F</sub> = 20.9 Hz), 84.2 (d, <sup>1</sup>*J*<sub>C-F</sub> = 177.9 Hz), 62.1, 52.3, 14.1.

**HRMS (ESI)** Calcd for C<sub>14</sub>H<sub>16</sub>FO<sub>4</sub> [M+H]<sup>+</sup>: 267.1027, found 267.1027.

Methyl (*Z*)-2-(4-ethoxy-3-fluoro-4-oxobut-1-en-1-yl)benzoate (**27**)

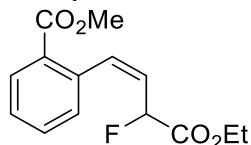

Purification by column chromatography over silica (n-pentane/ethyl acetate 80/1): 50.1 mg of colorless oil (94% yield) of *Z*-alkene/*E*-alkene mixture (98/2).

**<sup>1</sup>H NMR** (400 MHz, CDCl<sub>3</sub>) δ 8.05 (dd, *J* = 7.8, 1.4 Hz, 1H), 7.56 (td, *J* = 7.6, 1.4 Hz, 1H), 7.50 – 7.41 (m, 3H), 5.88 (ddd, *J* = 11.4, 9.8, 8.8 Hz, 1H), 5.36 (ddd, *J* = 48.1, 9.8, 0.9 Hz, 1H), 4.26 (q, *J* = 7.1 Hz, 2H), 3.89 (s, 3H), 1.30 (t, *J* = 7.1 Hz, 3H).

**<sup>19</sup>F NMR** (376 MHz, Chloroform-*d*) δ -176.30.

**<sup>13</sup>C NMR** (101 MHz, Chloroform-*d*) δ 168.9 (d, <sup>2</sup>*J*<sub>C-F</sub> = 26.5 Hz), 167.0, 138.6 (d, <sup>3</sup>*J*<sub>C-F</sub> = 10.6 Hz), 136.7 (d, <sup>4</sup>*J*<sub>C-F</sub> = 3.0 Hz), 132.4, 131.0, 131.0 (d, <sup>5</sup>*J*<sub>C-F</sub> = 2.9 Hz), 129.3, 128.4, 122.3 (d, <sup>2</sup>*J*<sub>C-F</sub> = 20.1 Hz), 84.8 (d, <sup>1</sup>*J*<sub>C-F</sub> = 177.6 Hz), 62.0, 52.2, 14.2.

**HRMS (ESI)** Calcd for C<sub>14</sub>H<sub>16</sub>FO<sub>4</sub> [M+H]<sup>+</sup>: 267.1027, found 267.1028.

Ethyl (*Z*)-2-fluoro-4-(4-(trifluoromethyl)phenyl)but-3-enoate (**28**)

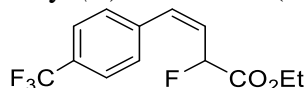

Purification by column chromatography over silica (n-pentane/ethyl acetate 80/1): 53.0 mg of colorless oil (96% yield) of *Z*-alkene/*E*-alkene mixture (96/4).

**<sup>1</sup>H NMR** (400 MHz, CDCl<sub>3</sub>) δ 7.66 (d, *J* = 8.1 Hz, 2H), 7.53 (d, *J* = 8.1 Hz, 2H), 6.99 (dd, *J* = 11.5, 3.4 Hz, 1H), 5.98 – 5.89 (m, 1H), 5.56 (ddd, *J* = 48.0, 9.6, 1.1 Hz, 1H), 4.31 (q, *J* = 7.1 Hz, 2H), 1.34 (t, *J* = 7.1 Hz, 3H).

**<sup>19</sup>F NMR** (376 MHz, Chloroform-*d*) δ -62.72, -175.87.

**<sup>13</sup>C NMR** (101 MHz, Chloroform-*d*) δ 168.5 (d, <sup>2</sup>*J*<sub>C-F</sub> = 26.0 Hz), 138.5, 136.4 (d, <sup>3</sup>*J*<sub>C-F</sub> = 10.3 Hz), 130.4 (q, <sup>2</sup>*J*<sub>C-F</sub> = 32.8 Hz), 129.2 (d, <sup>5</sup>*J*<sub>C-F</sub> = 2.8 Hz), 125.5 (q, <sup>3</sup>*J*<sub>C-F</sub> = 3.7 Hz), 125.1 (d, <sup>2</sup>*J*<sub>C-F</sub> = 20.6 Hz), 124.0 (q, <sup>1</sup>*J*<sub>C-F</sub> = 267.7 Hz), 84.2 (d, <sup>1</sup>*J*<sub>C-F</sub> = 178.7 Hz), 62.2, 14.1.

Spectral Data was agreed with previously report.<sup>[20]</sup>

Ethyl (*Z*)-4-(4-cyanophenyl)-2-fluorobut-3-enoate (**29**)

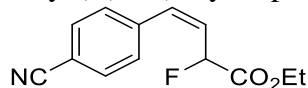

Purification by column chromatography over silica (n-pentane/ethyl acetate 80/1): 43.4 mg of colorless oil (93% yield) of *Z*-alkene/*E*-alkene mixture (87/13).

**<sup>1</sup>H NMR** (400 MHz, CDCl<sub>3</sub>) δ 7.69 (d, *J* = 8.4 Hz, 2H), 7.53 (d, *J* = 8.2 Hz, 2H), 6.96 (dd, *J* = 11.6, 3.4 Hz, 1H), 5.97 (ddd, *J* = 11.6, 10.7, 9.4 Hz, 1H), 5.53 (ddd, *J* = 47.9, 9.5, 1.1 Hz, 1H), 4.32 (q, *J* = 7.2 Hz, 2H), 1.34 (t, *J* = 7.1 Hz, 3H).

**<sup>19</sup>F NMR** (376 MHz, Chloroform-*d*) δ -176.17.

**<sup>13</sup>C NMR** (101 MHz, Chloroform-*d*) δ 168.4 (d, <sup>2</sup>*J*<sub>C-F</sub> = 25.7 Hz), 139.6 (d, <sup>4</sup>*J*<sub>C-F</sub> = 2.9 Hz), 136.0 (d, <sup>3</sup>*J*<sub>C-F</sub> = 10.3 Hz), 132.5, 129.7 (d, <sup>5</sup>*J*<sub>C-F</sub> = 2.9 Hz), 125.9 (d, <sup>2</sup>*J*<sub>C-F</sub> = 20.8 Hz), 118.6, 112.3, 84.2 (d, <sup>1</sup>*J*<sub>C-F</sub> = 179.7 Hz), 62.4, 14.2.

**HRMS (ESI)** Calcd for C<sub>13</sub>H<sub>12</sub>FNO<sub>2</sub> [M+H]<sup>+</sup>: 234.0925, found 234.0925.

Ethyl (Z)-4-(4-acetylphenyl)-2-fluorobut-3-enoate (**30**)

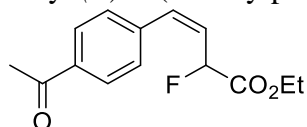

Purification by column chromatography over silica (n-pentane/ethyl acetate 80/1): 40.0 mg of colorless oil (80% yield) of *Z*-alkene/*E*-alkene mixture (96/4).

**<sup>1</sup>H NMR** (400 MHz, CDCl<sub>3</sub>) δ 8.02 – 7.94 (m, 2H), 7.51 (d, *J* = 8.2 Hz, 2H), 6.99 (dd, *J* = 11.5, 3.5 Hz, 1H), 5.93 (ddd, *J* = 11.5, 10.5, 9.6 Hz, 1H), 5.59 (ddd, *J* = 48.0, 9.5, 1.1 Hz, 1H), 4.31 (q, *J* = 7.1 Hz, 2H), 2.62 (s, 3H), 1.34 (t, *J* = 7.1 Hz, 3H).

**<sup>19</sup>F NMR** (376 MHz, Chloroform-*d*) δ -175.70.

**<sup>13</sup>C NMR** (101 MHz, Chloroform-*d*) δ 197.7, 168.7 (d, *J* = <sup>2</sup>*J*<sub>C-F</sub> Hz), 139.7 (d, <sup>4</sup>*J*<sub>C-F</sub> = 3.1 Hz), 136.9 (d, <sup>3</sup>*J*<sub>C-F</sub> = 10.5 Hz), 136.8, 129.2 (d, <sup>5</sup>*J*<sub>C-F</sub> = 2.7 Hz), 128.7, 125.0 (d, <sup>2</sup>*J*<sub>C-F</sub> = 20.7 Hz), 84.4 (d, <sup>1</sup>*J*<sub>C-F</sub> = 178.5 Hz), 62.3, 26.8, 14.3.

**HRMS (ESI)** Calcd for C<sub>14</sub>H<sub>16</sub>FO<sub>3</sub> [M+H]<sup>+</sup>: 251.1078 found 251.1077.

Ethyl (Z)-2-fluoro-4-(4-(methylsulfonyl)phenyl)but-3-enoate (**31**)

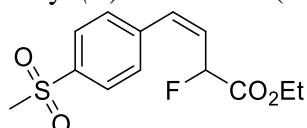

Purification by column chromatography over silica (n-pentane/ethyl acetate 80/1): 52.7 mg of colorless oil (82% yield) of *Z*-alkene/*E*-alkene mixture (92/8).

**<sup>1</sup>H NMR** (400 MHz, CDCl<sub>3</sub>) δ 8.02 (d, *J* = 1.8 Hz, 1H), 8.00 (t, *J* = 1.9 Hz, 0.14H, Ph alkene), 7.93 (dt, *J* = 7.8, 1.5 Hz, 1H), 7.87 (dt, *J* = 7.7, 1.5 Hz, 0.14H, Ph alkene), 7.72 (dq, *J* = 8.2, 1.1 Hz, 1H), 7.71 – 7.64 (m, 0.17H, Ph alkene), 7.62 (t, *J* = 7.8 Hz, 1H), 7.57 (t, *J* = 7.8 Hz, 0.18H, Ph alkene), 6.99 (dd, *J* = 11.6, 3.3 Hz, 1H), 6.90 (dt, *J* = 15.9, 2.1 Hz, 0.13H, Ph alkene), 6.44 (td, *J* = 15.9, 5.8 Hz, 0.14H, Ph alkene), 5.98 (td, *J* = 11.5, 9.4 Hz, 1H), 5.54 (ddd, *J* = 47.9, 9.4, 1.1 Hz, 1H), 5.50 (ddd, *J* = 47.9, 5.8, 1.7 Hz, 0.07H, CH alkene), 4.45 (t, *J* = 6.2 Hz, 0.22H, CH<sub>2</sub> alkene), 4.33 (qd, *J* = 7.1, 3.0 Hz, 2H), 3.09 (s, 3H), 3.07 (s, 0.45H, CH<sub>3</sub> alkene), 1.35 (td, *J* = 7.2, 3.6 Hz, 3H), 1.35 (t, *J* = 7.2 Hz, 0.4H, CH<sub>3</sub> alkene).

**<sup>19</sup>F NMR** (376 MHz, Chloroform-*d*) δ -176.32, -187.12 (*E*-alkene).

**<sup>13</sup>C NMR** (101 MHz, Chloroform-*d*) δ 168.4 (d, <sup>2</sup>*J*<sub>C-F</sub> = 26.0 Hz), 141.2, 136.5 (d, <sup>4</sup>*J*<sub>C-F</sub> = 2.8 Hz), 135.6 (d, <sup>3</sup>*J*<sub>C-F</sub> = 10.4 Hz), 134.0 (d, <sup>5</sup>*J*<sub>C-F</sub> = 2.5 Hz), 130.0, 129.8, 127.8 (d, <sup>5</sup>*J*<sub>C-F</sub> = 2.7 Hz), 127.1, 125.73, 125.5 (d, <sup>6</sup>*J*<sub>C-F</sub> = 4.6 Hz), 88.0 (d, <sup>1</sup>*J*<sub>C-F</sub> = 186.2 Hz, *E*-alkene), 84.3 (d, <sup>1</sup>*J*<sub>C-F</sub> = 179.3 Hz), 66.9, 62.4 (d, <sup>4</sup>*J*<sub>C-F</sub> = 11.8 Hz), 44.5, 14.2.

**HRMS (ESI)** Calcd for C<sub>13</sub>H<sub>15</sub>FO<sub>4</sub>Na [M+Na]<sup>+</sup>: 309.0567 found 309.0561.

Ethyl (Z)-2-fluoro-4-(thiophen-3-yl)but-3-enoate (**32**)

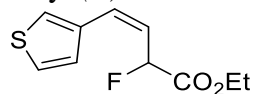

Purification by column chromatography over silica (n-pentane/ethyl acetate 80/1): 36.4 mg of colorless oil (85% yield) of *Z*-alkene/*E*-alkene mixture (96/4).

**<sup>1</sup>H NMR** (400 MHz, CDCl<sub>3</sub>) δ 7.53 – 7.47 (m, 1H), 7.34 (dd, *J* = 5.0, 2.9 Hz, 1H), 7.15 (dd, *J* = 5.0, 1.3 Hz, 1H), 6.89 – 6.84 (m, 1H), 5.81 – 5.65 (m, 2H), 4.31 (qd, *J* = 7.1, 1.4 Hz, 2H), 1.33 (t, *J* = 7.1 Hz, 3H).

**<sup>19</sup>F NMR** (376 MHz, Chloroform-*d*) δ -175.32.

**<sup>13</sup>C NMR** (101 MHz, Chloroform-*d*) δ 168.8 (d, <sup>2</sup>*J*<sub>C-F</sub> = 26.3 Hz), 136.2 (d, <sup>4</sup>*J*<sub>C-F</sub> = 3.3 Hz), 131.6 (d, <sup>3</sup>*J*<sub>C-F</sub> = 10.5 Hz), 128.4 (d, <sup>5</sup>*J*<sub>C-F</sub> = 2.2 Hz), 126.1, 125.5 (d, <sup>6</sup>*J*<sub>C-F</sub> = 3.3 Hz), 122.3 (d, <sup>2</sup>*J*<sub>C-F</sub> = 21.2 Hz), 84.8 (d, <sup>1</sup>*J*<sub>C-F</sub> = 178.3 Hz), 62.0, 14.1.

**HRMS (ESI)** Calcd for C<sub>10</sub>H<sub>11</sub>FO<sub>2</sub>SNa [M+H]<sup>+</sup>: 237.0356, found 237.0359.

Ethyl (*Z*)-2-fluoro-5-phenylpent-3-enoate (**33**)

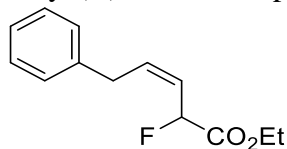

Purification by column chromatography over silica (n-pentane/ethyl acetate 80/1): 38.7 mg of colorless oil (87% yield) of *E*-alkene/*Z*-alkene mixture (77/23).

**<sup>1</sup>H NMR** (400 MHz, CDCl<sub>3</sub>) δ 7.32 (s, 1.01H, Ph alkene), 7.30 (s, 1H), 7.29 (s, 0.54H, Ph alkene), 7.22 (t, *J* = 7.4 Hz, 2H), 7.19 – 7.15 (m, 2H), 6.20 – 6.11 (m, 1H), 5.67 (dddd, *J* = 10.3, 7.2, 3.6, 1.5 Hz, 0.33H, CH alkene), 5.25 (ddd, *J* = 48.3, 6.8, 1.1 Hz, 1H), 4.25 (t, *J* = 7.1 Hz, 2H), 3.60 – 3.55 (m, 0.6H, CH<sub>2</sub> alkene), 3.48 – 3.42 (m, 2H), 1.35 – 1.30 (m, 1.05H, CH<sub>3</sub> alkene), 1.29 (d, *J* = 7.1 Hz, 3H).

**<sup>19</sup>F NMR** (376 MHz, Chloroform-*d*) δ -181.67 (*E*-alkene), -182.65.

**<sup>13</sup>C NMR** (101 MHz, Chloroform-*d*) δ 168.9 (t, <sup>2</sup>*J*<sub>C-F</sub> = 26.6 Hz, *E*-alkene), δ 168.7 (d, <sup>2</sup>*J*<sub>C-F</sub> = 25.8 Hz), 139.0, 138.8 (d, <sup>5</sup>*J*<sub>C-F</sub> = 2.1 Hz), 137.2 (d, <sup>3</sup>*J*<sub>C-F</sub> = 9.8 Hz, *E*-alkene), 137.0 (d, <sup>3</sup>*J*<sub>C-F</sub> = 10.9 Hz), 128.7 (d, <sup>6</sup>*J*<sub>C-F</sub> = 5.2 Hz), 128.6, 126.6 (d, <sup>8</sup>*J*<sub>C-F</sub> = 1.5 Hz), 124.0 (d, <sup>2</sup>*J*<sub>C-F</sub> = 19.5 Hz), 122.9 (d, <sup>2</sup>*J*<sub>C-F</sub> = 21.4 Hz, *E*-alkene), 88.5 (d, <sup>1</sup>*J*<sub>C-F</sub> = 182.4 Hz), 84.6 (d, <sup>1</sup>*J*<sub>C-F</sub> = 178.5 Hz, *E*-alkene), 61.9, 38.6, 14.2.

**HRMS (ESI)** Calcd for C<sub>13</sub>H<sub>15</sub>FO<sub>2</sub>Na [M+Na]<sup>+</sup>: 245.0948, found 245.0947.

Ethyl (*Z*)-4-cyclohexyl-2-fluorobut-3-enoate (**34**)

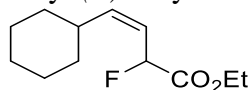

Purification by column chromatography over silica (n-pentane/ethyl acetate 80/1): 28.7 mg of colorless oil (67% yield) of *E*-alkene/*Z*-alkene mixture (84/16).

**<sup>1</sup>H NMR** (400 MHz, CDCl<sub>3</sub>) δ 5.95 (dddd, *J* = 15.6, 6.6, 4.1, 1.2 Hz, 1H), 5.55 (dddd, *J* = 15.6, 12.0, 7.0, 1.4 Hz, 1H), 5.20 (ddt, *J* = 48.5, 7.0, 0.9 Hz, 1H), 4.29 – 4.24 (m, 2H), 2.10 – 1.97 (m, 1H), 1.73 (dd, *J* = 9.5, 3.4 Hz, 4H), 1.30 (t, *J* = 7.2 Hz, 5H), 1.16 – 1.03 (m, 3H).

**<sup>19</sup>F NMR** (376 MHz, Chloroform-*d*) δ -180.18 (*E*-alkene), -181.06.

**<sup>13</sup>C NMR** (101 MHz, Chloroform-*d*) δ 168.9 (d, <sup>2</sup>*J*<sub>C-F</sub> = 26.2 Hz), 144.9 (d, <sup>3</sup>*J*<sub>C-F</sub> = 10.2 Hz, *E*-alkene), 144.4 (d, <sup>3</sup>*J*<sub>C-F</sub> = 10.4 Hz), 120.0 (d, <sup>2</sup>*J*<sub>C-F</sub> = 19.5 Hz), 89.0 (d, <sup>1</sup>*J*<sub>C-F</sub> = 181.3 Hz), 84.7 (d, <sup>1</sup>*J*<sub>C-F</sub> = 177.3 Hz, *E*-alkene), 61.6, 40.3, 37.4 (*E*-alkene), 33.0 – 32.6 (m), 32.2 (dd, <sup>5</sup>*J*<sub>C-F</sub> = 8.8, 2.1 Hz), 26.0, 25.8 (d, <sup>6</sup>*J*<sub>C-F</sub> = 1.3 Hz), 25.8 (*E*-alkene), 25.5 (d, <sup>6</sup>*J*<sub>C-F</sub> = 8.8 Hz, *E*-alkene), 14.1, 14.1. **HRMS (ESI)** Calcd for C<sub>12</sub>H<sub>20</sub>FO<sub>2</sub> [M+H]<sup>+</sup>: 215.1442, found 215.1441.

Ethyl (*Z*)-5-cyclohexyl-2-fluoropent-3-enoate (**35**)

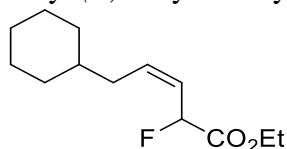

Purification by column chromatography over silica (n-pentane/ethyl acetate 80/1): 35.1 mg of Colorless oil (77% yield) of *Z*-alkene/*E*-alkene mixture (71/29).

**<sup>1</sup>H NMR** (400 MHz, CDCl<sub>3</sub>) δ 6.02 – 5.93 (m, 1H), 5.92 – 5.85 (m, 0.44H, *E*-alkene), 5.61 – 5.57 (m, 1H), 5.55 – 5.45 (m, 0.42H, *E*-alkene), 5.29 – 5.13 (m, 1H), 4.29 – 4.25 (m, 2H), 4.24 (d, *J* = 2.8 Hz, 0.8H, *E*-alkene), 2.10 (dtd, *J* = 7.8, 4.6, 1.4 Hz, 0.9H, *E*-alkene), 2.00 (qd, *J* = 6.0, 5.3, 2.6 Hz, 2H), 1.73 – 1.69 (m, 3H), 1.68 (d, *J* = 2.3 Hz, 3H), 1.30 (td, *J* = 7.1, 1.8 Hz, 5H), 1.24 – 1.16 (m, 3H), 1.15 – 1.09 (m, 0.96H, *E*-alkene), 0.95 – 0.86 (m, 2.4H, *E*-alkene).

**<sup>19</sup>F NMR** (376 MHz, Chloroform-*d*) δ -180.64 (*E*-alkene), -180.89.

**<sup>13</sup>C NMR** (101 MHz, Chloroform-*d*) δ 169.1 (d, <sup>2</sup>*J*<sub>C-F</sub> = 26.7 Hz, *E*-alkene), 168.9 (d, <sup>2</sup>*J*<sub>C-F</sub> = 26.2 Hz), 138.3 (d, <sup>3</sup>*J*<sub>C-F</sub> = 10.2 Hz, *E*-alkene), 137.9 (d, <sup>3</sup>*J*<sub>C-F</sub> = 10.8 Hz), 123.3 (d, <sup>2</sup>*J*<sub>C-F</sub> = 19.4 Hz), 122.5 (d, <sup>2</sup>*J*<sub>C-F</sub> = 21.1 Hz, *E*-alkene), 88.8 (d, <sup>1</sup>*J*<sub>C-F</sub> = 181.2 Hz), 84.4 (d, <sup>1</sup>*J*<sub>C-F</sub> = 176.9 Hz, *E*-alkene), 61.7, 40.2, 37.8 (d, <sup>4</sup>*J*<sub>C-F</sub> = 2.3 Hz, *E*-alkene), 37.4 (d, <sup>4</sup>*J*<sub>C-F</sub> = 2.4 Hz), 33.0 (d, <sup>6</sup>*J*<sub>C-F</sub> = 8.1 Hz), 26.4 (d, <sup>7</sup>*J*<sub>C-F</sub> = 4.1 Hz), 26.2, 14.1.

**HRMS (ESI)** Calcd for C<sub>13</sub>H<sub>22</sub>FO<sub>2</sub> [M+H]<sup>+</sup>: 229.1598, found 229.1598.

Ethyl (*Z*)-2-fluorododec-3-enoate (**36**)

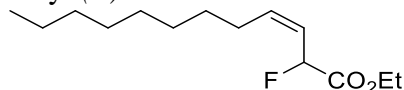

Purification by column chromatography over silica (n-pentane/ethyl acetate 80/1): 35.2 mg of colorless oil (72% yield) of *Z*-alkene/*E*-alkene mixture (77/23).

**<sup>1</sup>H NMR** (400 MHz, CDCl<sub>3</sub>) δ 6.00 (dtdd, *J* = 15.1, 6.8, 4.2, 1.2 Hz, 1H), 5.89 – 5.84 (m, 0.29H, *E*-alkene), 5.64 – 5.57 (m, 1H), 5.55 – 5.50 (m, 0.34H, *E*-alkene), 5.20 (ddd, *J* = 48.4, 7.1, 1.1 Hz, 1H), 4.28 (d, *J* = 2.1 Hz, 0.34H, *E*-alkene), 4.25 (td, *J* = 7.2, 2.0 Hz, 2H), 2.23 – 2.17 (m, 0.55H, *E*-alkene), 2.13 – 2.06 (m, 2H), 1.46 – 1.36 (m, 2H), 1.31 – 1.23 (m, 6H), 0.92 (t, *J* = 7.5 Hz, 0.41H, *E*-alkene), 0.89 – 0.86 (m, 2H).

**<sup>19</sup>F NMR** (376 MHz, Chloroform-*d*) δ -180.91, -180.96 (*E*-alkene).

**<sup>13</sup>C NMR** (101 MHz, Chloroform-*d*) δ 168.8 (d, <sup>2</sup>*J*<sub>C-F</sub> = 26.2 Hz), 139.4 (d, <sup>3</sup>*J*<sub>C-F</sub> = 10.3 Hz, *E*-alkene), 139.1 (d, <sup>3</sup>*J*<sub>C-F</sub> = 10.7 Hz), 122.4 (d, <sup>2</sup>*J*<sub>C-F</sub> = 19.4 Hz), 122.0 (d, <sup>2</sup>*J*<sub>C-F</sub> = 21.1 Hz, *E*-alkene), 88.7 (d, <sup>1</sup>*J*<sub>C-F</sub> = 181.4 Hz), 84.5 (d, <sup>1</sup>*J*<sub>C-F</sub> = 177.5 Hz, *E*-alkene), 61.6, 32.2, 31.8, 29.4 (*E*-alkene), 29.4, 29.2, 29.2 (*E*-alkene), 29.1, 28.5 (d, <sup>4</sup>*J*<sub>C-F</sub> = 2.2 Hz), 28.1 (*E*-alkene), 22.6, 14.1, 14.1.

**HRMS (ESI)** Calcd for C<sub>14</sub>H<sub>26</sub>FO<sub>2</sub> [M+H]<sup>+</sup>: 245.1911, found 245.1910.

Ethyl (*Z*)-4-(adamantan-1-yl)-2-fluorobut-3-enoate (**37**)

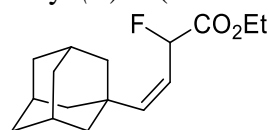

Purification by column chromatography over silica (n-pentane/ethyl acetate 80/1): 32.0 mg of colorless oil (60% yield) of *Z*-alkene/*E*-alkene mixture (94/6).

**<sup>1</sup>H NMR** (400 MHz, CDCl<sub>3</sub>) δ 5.85 (ddd, *J* = 15.8, 4.0, 1.1 Hz, 1H), 5.44 (ddd, *J* = 15.8, 12.1, 6.9 Hz, 1H), 5.21 (ddd, *J* = 48.6, 7.0, 1.2 Hz, 1H), 4.26 (q, *J* = 7.1 Hz, 2H), 2.00 (t, *J* = 3.1 Hz, 3H), 1.76 – 1.70 (m, 3H), 1.68 – 1.58 (m, 9H), 1.31 (t, *J* = 7.2 Hz, 3H).

**<sup>19</sup>F NMR** (376 MHz, Chloroform-*d*) δ -180.92.

**<sup>13</sup>C NMR** (101 MHz, Chloroform-*d*)  $\delta$  169.0 (d,  $^2J_{C-F}$  = 26.3 Hz), 149.4 (d,  $^3J_{C-F}$  = 10.2 Hz), 117.7 (d,  $^2J_{C-F}$  = 19.7 Hz), 89.2 (d,  $^1J_{C-F}$  = 181.4 Hz), 41.5 (d,  $^5J_{C-F}$  = 1.8 Hz), 36.7, 35.2, 28.2, 14.1.

**HRMS (ESI)** Calcd for C<sub>16</sub>H<sub>23</sub>FO<sub>2</sub>Na [M+Na]<sup>+</sup>: 289.1574, found 289.1569.

(1*S*,2*S*,4*R*)-1,7,7-trimethylbicyclo[2.2.1]heptan-2-yl 4-((*Z*)-4-ethoxy-3-fluoro-4-oxobut-1-en-1-yl)benzoate (**38**)

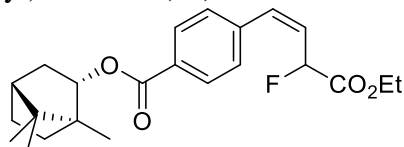

Purification by column chromatography over silica (n-pentane/ethyl acetate 80/1): 55.9 mg of colorless oil (72% yield) of *Z*-alkene/*E*-alkene mixture (95/5).

**<sup>1</sup>H NMR** (400 MHz, CDCl<sub>3</sub>)  $\delta$  8.20 – 7.42 (m, 4H), 7.01 (dd,  $J$  = 11.5, 3.5 Hz, 1H), 6.09 – 5.84 (m, 1H), 5.60 (ddd,  $J$  = 48.0, 9.6, 1.0 Hz, 1H), 5.13 (ddd,  $J$  = 10.0, 3.5, 2.1 Hz, 1H), 4.31 (q,  $J$  = 7.1 Hz, 2H), 2.57 – 2.41 (m, 1H), 2.13 (ddd,  $J$  = 13.3, 9.4, 4.4 Hz, 1H), 1.82 (dtt,  $J$  = 15.3, 8.0, 4.1 Hz, 1H), 1.75 (t,  $J$  = 4.5 Hz, 1H), 1.68 – 1.37 (m, 2H), 1.34 (t,  $J$  = 7.1 Hz, 3H), 1.13 (dd,  $J$  = 13.8, 3.5 Hz, 1H), 0.98 (s, 3H), 0.92 (d,  $J$  = 1.2 Hz, 6H).

**<sup>19</sup>F NMR** (376 MHz, Chloroform-*d*)  $\delta$  -175.66.

**<sup>13</sup>C NMR** (101 MHz, Chloroform-*d*)  $\delta$  168.7 (d,  $^2J_{C-F}$  = 26.0 Hz), 166.5, 139.4 (d,  $^4J_{C-F}$  = 3.1 Hz), 137.1 (d,  $^3J_{C-F}$  = 10.5 Hz), 130.8, 129.8, 129.0 (d,  $^5J_{C-F}$  = 2.7 Hz), 124.9 (d,  $^2J_{C-F}$  = 20.8 Hz), 84.4 (d,  $^1J_{C-F}$  = 178.4 Hz), 80.9, 62.2, 49.3, 48.1, 45.1, 37.1, 28.2, 27.6, 19.9, 19.1, 14.2, 13.8.

**HRMS (ESI)** Calcd for C<sub>23</sub>H<sub>29</sub>FO<sub>4</sub>Na [M+Na]<sup>+</sup>: 411.1942, found 411.1938.

2-isopropyl-5-methylcyclohexyl (*Z*)-4-(4-ethoxy-3-fluoro-4-oxobut-1-en-1-yl)benzoate (**39**)

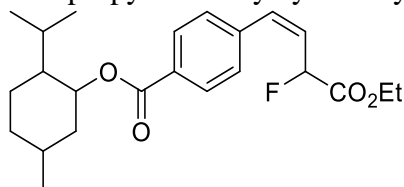

Purification by column chromatography over silica (n-pentane/ethyl acetate 80/1): 50.7 mg of colorless oil (65% yield) of *Z*-alkene/*E*-alkene mixture (95/5).

**<sup>1</sup>H NMR** (400 MHz, CDCl<sub>3</sub>)  $\delta$  8.11 – 8.00 (m, 2H), 7.47 (d,  $J$  = 8.0 Hz, 2H), 7.00 (dd,  $J$  = 11.5, 3.5 Hz, 1H), 6.04 – 5.82 (m, 1H), 5.59 (dddd,  $J$  = 48.0, 9.6, 4.3, 1.0 Hz, 1H), 4.94 (td,  $J$  = 10.9, 4.4 Hz, 1H), 4.31 (q,  $J$  = 7.1 Hz, 2H), 2.23 – 2.07 (m, 1H), 1.95 (pt,  $J$  = 7.1, 3.5 Hz, 1H), 1.78 – 1.70 (m, 2H), 1.69 – 1.46 (m, 3H), 1.34 (t,  $J$  = 7.1 Hz, 3H), 1.13 (qd,  $J$  = 12.6, 12.1, 10.0 Hz, 2H), 0.93 (dd,  $J$  = 6.8, 4.3 Hz, 6H), 0.80 (d,  $J$  = 6.9 Hz, 3H).

**<sup>19</sup>F NMR** (376 MHz, Chloroform-*d*)  $\delta$  -175.58.

**<sup>13</sup>C NMR** (101 MHz, Chloroform-*d*)  $\delta$  168.7 (d,  $^2J_{C-F}$  = 26.1 Hz), 165.8, 139.4 (d,  $^4J_{C-F}$  = 3.1 Hz), 137.1 (dd,  $^3J_{C-F}$  = 10.5, 4.3 Hz), 130.8, 129.9, 129.0 (d,  $^5J_{C-F}$  = 2.7 Hz), 124.8 (d,  $^2J_{C-F}$  = 20.6 Hz), 84.4 (d,  $^1J_{C-F}$  = 178.2 Hz), 75.2, 62.2, 47.4, 41.1, 34.5, 31.6, 26.7, 23.8, 22.2, 20.9, 16.7, 14.2.

**HRMS (ESI)** Calcd for C<sub>23</sub>H<sub>31</sub>FO<sub>4</sub>Na [M+Na]<sup>+</sup>: 413.2099, found 413.2096.

Ethyl (*Z*)-2-fluoro-4-(3-(((*S*)-2-(6-methoxynaphthalen-2-yl)propanoyl)oxy)phenyl)but-3-enoate (**40**)

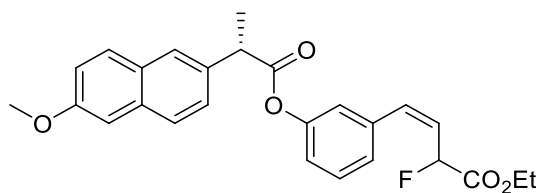

Purification by column chromatography over silica (n-pentane/ethyl acetate 80/1): 75.0 mg of colorless oil (86% yield) of *Z*-alkene/*E*-alkene mixture (96/4).

**<sup>1</sup>H NMR** (400 MHz, CDCl<sub>3</sub>) δ 7.80 – 7.70 (m, 3H), 7.50 (dd, *J* = 8.5, 1.9 Hz, 1H), 7.34 (t, *J* = 7.9 Hz, 1H), 7.25 – 7.20 (m, 1H), 7.19 – 7.12 (m, 2H), 7.08 (q, *J* = 2.4 Hz, 1H), 6.98 (dd, *J* = 8.1, 2.3 Hz, 1H), 6.89 (dd, *J* = 11.4, 3.5 Hz, 1H), 5.81 (dt, *J* = 11.7, 10.1 Hz, 1H), 5.58 (dddd, *J* = 47.8, 9.5, 2.8, 1.0 Hz, 1H), 4.27 – 4.16 (m, 2H), 4.10 (q, *J* = 7.1 Hz, 1H), 3.92 (s, 3H), 1.69 (d, *J* = 7.1 Hz, 3H), 1.23 (t, *J* = 7.1 Hz, 3H).

**<sup>19</sup>F NMR** (376 MHz, Chloroform-*d*) δ -175.39.

**<sup>13</sup>C NMR** (101 MHz, Chloroform-*d*) δ 173.1, 168.6 (d, <sup>2</sup>*J*<sub>C-F</sub> = 26.4 Hz), 157.8, 150.9, 136.8 (dd, <sup>3</sup>*J*<sub>C-F</sub> = 10.6, 5.3 Hz), 136.3 (d, <sup>4</sup>*J*<sub>C-F</sub> = 3.1 Hz), 135.0, 133.9, 129.5, 129.3, 129.0, 127.4, 126.3 (d, <sup>7</sup>*J*<sub>C-F</sub> = 2.3 Hz), 126.2, 126.1, 123.9 (d, <sup>2</sup>*J*<sub>C-F</sub> = 20.9 Hz), 121.9, 121.4, 119.2, 105.6, 84.2 (d, <sup>1</sup>*J*<sub>C-F</sub> = 177.7 Hz), 62.0, 55.3, 45.6, 18.5 (d, <sup>9</sup>*J*<sub>C-F</sub> = 2.9 Hz), 14.0.

**HRMS (ESI)** Calcd for C<sub>26</sub>H<sub>25</sub>FO<sub>5</sub>Na [M+Na]<sup>+</sup>: 459.1578, found 459.1574.

Ethyl (*Z*)-2-fluoro-4-(3-((2-(4-isobutylphenyl)propanoyl)oxy)phenyl)but-3-enoate (**41**)

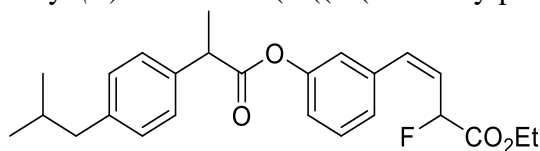

Purification by column chromatography over silica (n-pentane/ethyl acetate 80/1): 73.4 mg of colorless oil (89% yield) of *Z*-alkene/*E*-alkene mixture (96/4).

**<sup>1</sup>H NMR** (400 MHz, CDCl<sub>3</sub>) δ 7.38 – 7.27 (m, 3H), 7.27 – 7.21 (m, 1H), 7.19 – 7.06 (m, 3H), 6.98 (dd, *J* = 8.3, 2.3 Hz, 1H), 6.90 (dd, *J* = 11.4, 3.5 Hz, 1H), 5.82 (dt, *J* = 11.4, 9.9 Hz, 1H), 5.59 (ddt, *J* = 47.9, 9.6, 1.3 Hz, 1H), 4.26 (q, *J* = 7.1 Hz, 2H), 3.94 (q, *J* = 7.1 Hz, 1H), 2.47 (d, *J* = 7.2 Hz, 2H), 1.86 (dq, *J* = 13.5, 6.8 Hz, 1H), 1.60 (d, *J* = 7.1 Hz, 3H), 1.28 (t, *J* = 7.2 Hz, 3H), 0.91 (d, *J* = 6.6 Hz, 6H).

**<sup>19</sup>F NMR** (376 MHz, Chloroform-*d*) δ -175.58.

**<sup>13</sup>C NMR** (101 MHz, Chloroform-*d*) δ 173.2, 168.8 (d, <sup>2</sup>*J*<sub>C-F</sub> = 26.4 Hz), 151.0, 141.0, 137.2, 137.0 (dd, <sup>3</sup>*J*<sub>C-F</sub> = 10.4, 2.5 Hz), 136.4 (d, <sup>4</sup>*J*<sub>C-F</sub> = 3.2 Hz), 129.7, 129.5, 127.3, 126.4 (d, <sup>7</sup>*J*<sub>C-F</sub> = 2.9 Hz), 124.0 (d, <sup>2</sup>*J*<sub>C-F</sub> = 20.6 Hz), 122.0 (d, <sup>5</sup>*J*<sub>C-F</sub> = 2.9 Hz), 121.5, 84.3 (d, <sup>1</sup>*J*<sub>C-F</sub> = 177.7 Hz), 62.1, 45.4, 45.2, 30.3, 22.5, 18.6 (d, <sup>9</sup>*J*<sub>C-F</sub> = 1.4 Hz), 14.2.

**HRMS (ESI)** Calcd for C<sub>25</sub>H<sub>30</sub>FO<sub>4</sub> [M+H]<sup>+</sup>: 413.2123, found 413.2121.

Ethyl (*Z*)-2-fluoro-4-((8*R*,9*S*,13*S*,14*S*)-13-methyl-17-oxo-7,8,9,11,12,13,14,15,16,17-decahydro-6*H*-cyclopenta[*a*]phenanthren-3-yl)but-3-enoate (**42**)

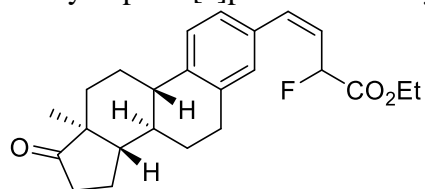

Purification by column chromatography over silica (n-pentane/ethyl acetate 80/1): 63.8 mg of colorless oil (83% yield) of *Z*-alkene/*E*-alkene mixture (95/5).

**<sup>1</sup>H NMR** (400 MHz, CDCl<sub>3</sub>) δ 7.32 (d, *J* = 8.0 Hz, 1H), 7.21 (dt, *J* = 8.1, 2.2 Hz, 1H), 7.16 (s, 1H), 6.93 (dd, *J* = 11.1, 3.7 Hz, 1H), 5.91 – 5.57 (m, 2H), 4.39 – 4.19 (m, 2H), 2.94 (dd, *J* = 8.9, 4.2 Hz, 2H), 2.58 – 2.40 (m, 2H), 2.32 (dt, *J* = 10.8, 6.1 Hz, 1H), 2.25 – 1.93 (m, 4H), 1.67 – 1.47 (m, 6H), 1.34 (t, *J* = 7.1 Hz, 3H), 0.92 (s, 3H).

**<sup>19</sup>F NMR** (376 MHz, Chloroform-*d*) δ -174.10, -182.87 (*E*-alkene).

**<sup>13</sup>C NMR** (101 MHz, Chloroform-*d*) δ 169.1 (d, <sup>2</sup>*J*<sub>C-F</sub> = 26.7 Hz), 140.4, 138.15 (d, <sup>3</sup>*J*<sub>C-F</sub> = 10.6 Hz), 136.9, 132.7, 129.7, 126.5 (d, <sup>6</sup>*J*<sub>C-F</sub> = 2.7 Hz), 125.7, 122.7 (d, <sup>2</sup>*J*<sub>C-F</sub> = 19.9 Hz), 84.7 (d, <sup>1</sup>*J*<sub>C-F</sub> = 177.4 Hz), 62.0, 50.7, 48.1, 44.6, 38.2, 36.0, 31.7, 29.8, 29.5, 26.6, 25.8, 21.7, 14.3, 14.0, 138.15 (d, *J* = 10.6 Hz),

**HRMS (ESI)** Calcd for C<sub>24</sub>H<sub>29</sub>FO<sub>3</sub>Na [M+Na]<sup>+</sup>: 407.1993, found 407.1993.

Ethyl (*Z*)-4-(4-(2-(1-(4-chlorobenzoyl)-5-methoxy-2-methyl-1*H*-indol-3-yl)acetamido)phenyl)-2-fluorobut-3-enoate (**43**)

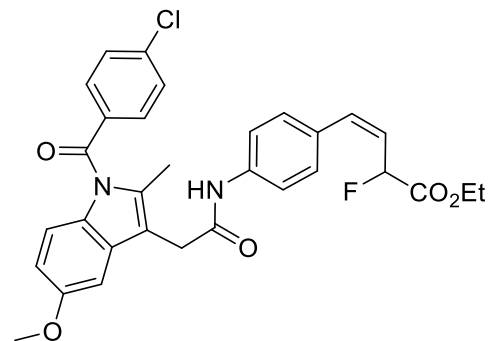

Purification by column chromatography over silica (n-pentane/ethyl acetate 80/1): 87.8 mg of yellow solid (78% yield) of *Z*-alkene/*E*-alkene mixture (90/10). m.p. 87-88°C.

**<sup>1</sup>H NMR** (400 MHz, CDCl<sub>3</sub>) δ 7.70 (d, *J* = 8.6 Hz, 2H), 7.53 – 7.47 (m, 2H), 7.43 (d, *J* = 8.6 Hz, 2H), 7.36 (d, *J* = 2.7 Hz, 2H), 7.33 (s, 1H), 6.93 (dd, *J* = 11.5, 3.1 Hz, 1H), 6.87 (d, *J* = 9.0 Hz, 1H), 6.73 (dd, *J* = 9.1, 2.5 Hz, 1H), 5.77 (dt, *J* = 11.4, 10.0 Hz, 1H), 5.59 (ddd, *J* = 47.9, 9.6, 0.9 Hz, 1H), 4.29 (qd, *J* = 7.1, 2.0 Hz, 2H), 3.83 (s, 2H), 3.82 (s, 3H), 2.47 (s, 3H), 1.32 (t, *J* = 7.1 Hz, 3H).

**<sup>19</sup>F NMR** (376 MHz, Chloroform-*d*) δ -174.39.

**<sup>13</sup>C NMR** (101 MHz, Chloroform-*d*) δ 169.1, 168.9, 168.4 (d, <sup>2</sup>*J*<sub>C-F</sub> = 11.1 Hz), 156.5, 139.9, 137.6, 137.4 (d, <sup>3</sup>*J*<sub>C-F</sub> = 10.4 Hz), 136.9, 133.5, 131.4, 131.0, 130.2, 129.8 (d, <sup>4</sup>*J*<sub>C-F</sub> = 2.7 Hz), 129.4, 122.7 (d, <sup>2</sup>*J*<sub>C-F</sub> = 20.6 Hz), 120.0, 115.4, 112.7, 112.2, 100.7, 84.5 (d, <sup>1</sup>*J*<sub>C-F</sub> = 177.4 Hz), 62.2, 55.9, 33.5, 14.3, 13.5.

**HRMS (ESI)** Calcd for C<sub>31</sub>H<sub>29</sub>ClFN<sub>2</sub>O<sub>5</sub> [M+H]<sup>+</sup>: 563.1744, found 563.1746.

Ethyl (*Z*)-2,2-difluoro-4-phenylbut-3-enoate (**44**)

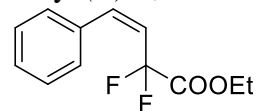

Purification by column chromatography over silica (n-pentane/ethyl acetate 80/1): 37.6 mg of colorless oil (83% yield) of *Z*-alkene/*E*-alkene mixture (77/23).

**<sup>1</sup>H NMR** (400 MHz, CDCl<sub>3</sub>) δ 7.49 – 7.42 (m, 0.7H, Ph alkene), 7.38 – 7.36 (m, 1.1H, Ph alkene), 7.34 (d, *J* = 3.4 Hz, 5H), δ 7.13 – 7.04 (m, 0.39H, CH alkene), 6.95 (dt, *J* = 12.6, 1.8 Hz,



1H), 6.31 (dt,  $J = 16.2, 11.4$  Hz, 0.32H, CH alkene), 5.88 (q,  $J = 12.9$  Hz, 1H), 4.35 (q,  $J = 7.1$  Hz, 0.67H, ), 4.02 (q,  $J = 7.2$  Hz, 2H), 1.39 – 1.33 (m, 1.14H, CH<sub>3</sub> alkene), 1.12 (t,  $J = 7.2$  Hz, 3H).

**<sup>19</sup>F NMR** (376 MHz, Chloroform-*d*)  $\delta$  -93.90, -103.29 (*E*-alkene).

**<sup>13</sup>C NMR** (101 MHz, Chloroform-*d*)  $\delta$  163.5 (t,  $^2J_{C-F} = 33.8$  Hz), 138.9 (t,  $^4J_{C-F} = 9.0$  Hz), 137.0 (t,  $^4J_{C-F} = 9.4$  Hz, *E*-alkene), 134.4, 129.8 (*E*-alkene), 129.0 (dd,  $^3J_{C-F} = 5.3, 2.6$  Hz), 128.9, 128.4, 127.6, 122.1 (t,  $^2J_{C-F} = 28.1$  Hz), 118.9 (t,  $^2J_{C-F} = 25.0$  Hz, *E*-alkene), 112.4 (t,  $^1J_{C-F} = 245.7$  Hz), 63.3 (*E*-alkene), 63.1, 14.1 (*E*-alkene), 13.7.

Spectral Data was agreed with previously report.<sup>[22,23]</sup>

#### Ethyl (*Z*)-2,2-difluoro-4-(*p*-tolyl)but-3-enoate (**45**)

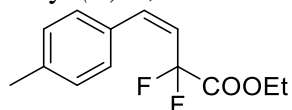

Purification by column chromatography over silica (n-pentane/ethyl acetate 80/1): 37.5 mg of colorless oil (78% yield) of *Z*-alkene/*E*-alkene mixture (74/26).

**<sup>1</sup>H NMR** (400 MHz, CDCl<sub>3</sub>)  $\delta$  7.35 (d,  $J = 8.2$  Hz, 0.77H, Ph alkene), 7.26 – 7.24 (m, 2H), 7.18 (d,  $J = 8.0$  Hz, 0.75H, Ph alkene), 7.15 (d,  $J = 7.9$  Hz, 2H), 7.05 (dt,  $J = 16.2, 2.6$  Hz, 0.36H, CH alkene), 6.90 (dt,  $J = 12.5, 1.9$  Hz, 1H), 6.25 (dt,  $J = 16.2, 11.5$  Hz, 0.35H, CH alkene), 5.82 (q,  $J = 13.1$  Hz, 1H), 4.34 (q,  $J = 7.1$  Hz, 0.73H, CH<sub>2</sub> alkene), 4.05 (q,  $J = 7.1$  Hz, 2H), 2.37 (s, 1.1H, CH<sub>3</sub> alkene), 2.35 (s, 3H), 1.36 (t,  $J = 7.1$  Hz, 1.1H, CH<sub>3</sub> alkene), 1.13 (t,  $J = 7.2$  Hz, 3H).

**<sup>19</sup>F NMR** (376 MHz, Chloroform-*d*)  $\delta$  -93.98, -103.04 (*E*-alkene).

**<sup>13</sup>C NMR** (101 MHz, Chloroform-*d*)  $\delta$  163.6 (t,  $^2J_{C-F} = 33.9$  Hz), 140.0 (*E*-alkene), 139.2 – 138.7 (m), 136.9 (t,  $^4J_{C-F} = 9.5$  Hz, *E*-alkene), 131.5, 129.7 (*E*-alkene), 129.1 (t,  $^3J_{C-F} = 2.9$  Hz), 129.1, 127.5, 121.1 (t,  $^2J_{C-F} = 28.0$  Hz), 117.8 (t,  $^2J_{C-F} = 25.0$  Hz, *E*-alkene), 112.5 (t,  $^1J_{C-F} = 245.6$  Hz), 63.2 (*E*-alkene), 63.1, 21.5 (*E*-alkene), 21.4, 14.1 (*E*-alkene), 13.7.

Spectral Data was agreed with previously report.<sup>[22,23]</sup>

#### Ethyl (*Z*)-2,2-difluoro-4-(*m*-tolyl)but-3-enoate (**46**)

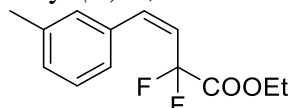

Purification by column chromatography over silica (n-pentane/ethyl acetate 80/1): 37.5 mg of colorless oil (78% yield) of *Z*-alkene/*E*-alkene mixture (74/26).

**<sup>1</sup>H NMR** (400 MHz, CDCl<sub>3</sub>)  $\delta$  7.42 – 7.34 (m, 0.35H, Ph alkene), 7.28 – 7.24 (m, 1H), 7.24 – 7.20 (m, 0.97H, Ph alkene), 7.14 (d,  $J = 5.5$  Hz, 3H), 7.05 (dt,  $J = 16.2, 2.6$  Hz, 0.36H, CH alkene), 6.92 (d,  $J = 12.5$  Hz, 1H), 6.29 (dt,  $J = 16.2, 11.5$  Hz, 0.3H, CH alkene), 5.85 (q,  $J = 12.8$  Hz, 1H), 4.35 (q,  $J = 7.1$  Hz, 0.61H, CH<sub>2</sub> alkene), 4.01 (q,  $J = 7.2$  Hz, 2H), 2.36 (s, 0.93H, CH<sub>3</sub> alkene), 2.34 (s, 3H), 1.39 – 1.33 (m, 0.84H, CH<sub>3</sub> alkene), 1.11 (t,  $J = 7.2$  Hz, 3H).

**<sup>19</sup>F NMR** (376 MHz, Chloroform-*d*)  $\delta$  -93.55, -103.23 (*E*-alkene).

**<sup>13</sup>C NMR** (101 MHz, Chloroform-*d*)  $\delta$  164.1 (t,  $^2J_{C-F} = 35.3$  Hz, *E*-alkene), 163.5 (t,  $^2J_{C-F} = 33.8$  Hz), 139.0 (t,  $^4J_{C-F} = 9.2$  Hz), 138.7, 138.0, 137.1 (t,  $^4J_{C-F} = 9.4$  Hz, *E*-alkene), 134.3, 134.1 (*E*-alkene), 130.6 (*E*-alkene), 129.7 (t,  $^3J_{C-F} = 2.6$  Hz), 129.6, 128.9, 128.3, 128.2 (*E*-alkene), 126.1 (t,  $^3J_{C-F} = 2.8$  Hz), 124.8, 121.9 (t,  $^2J_{C-F} = 28.2$  Hz), 118.6 (t,  $^2J_{C-F} = 24.9$  Hz, *E*-alkene), 112.4 (t,  $^1J_{C-F} = 245.4$  Hz), 63.3 (*E*-alkene), 63.0, 21.5, 14.1 (*E*-alkene), 13.7.

Spectral Data was agreed with previously report.<sup>[22]</sup>

Ethyl (Z)-2,2-difluoro-4-(*o*-tolyl)but-3-enoate (**47**)

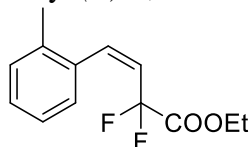

Purification by column chromatography over silica (n-pentane/ethyl acetate 80/1): 36.0 mg of colorless oil (75% yield) of *Z*-alkene/*E*-alkene mixture (71/29).

**<sup>1</sup>H NMR** (400 MHz, CDCl<sub>3</sub>) δ 7.47 (d, *J* = 7.5 Hz, 0.05H, Ph alkene), 7.43 – 7.33 (m, 0.15H, Ph alkene), 7.25 – 7.12 (m, 4H), 7.01 (d, *J* = 12.2 Hz, 1H), 5.96 (q, *J* = 11.6 Hz, 1H), 4.42 – 4.32 (m, 0.13H, CH<sub>2</sub> alkene), 3.85 (q, *J* = 7.2 Hz, 2H), 2.39 (s, 0.08H, CH<sub>3</sub> alkene), 2.26 (s, 3H), 1.41 – 1.33 (m, 0.18H, CH<sub>3</sub> alkene), 1.11 (t, *J* = 7.2 Hz, 3H).

**<sup>19</sup>F NMR** (376 MHz, Chloroform-*d*) δ -93.68, -97.89 (*E*-alkene).

**<sup>13</sup>C NMR** (101 MHz, Chloroform-*d*) δ 163.4 (t, <sup>2</sup>*J*<sub>C-F</sub> = 33.4 Hz), 138.2 (t, <sup>4</sup>*J*<sub>C-F</sub> = 9.6 Hz), 136.1, 133.9, 129.6, 129.3, 128.9, 125.7, 123.1 (t, <sup>2</sup>*J*<sub>C-F</sub> = 28.0 Hz), 112.4 (t, <sup>1</sup>*J*<sub>C-F</sub> = 245.2 Hz), 63.3 (*E*-alkene), 62.9, 20.0, 13.7.

Spectral Data was agreed with previously report.<sup>[22]</sup>

Ethyl (Z)-4-(4-ethylphenyl)-2,2-difluorobut-3-enoate (**48**)

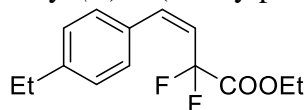

Purification by column chromatography over silica (n-pentane/ethyl acetate 80/1): 40.7 mg of colorless oil (80% yield) of *Z*-alkene/*E*-alkene mixture (71/29).

**<sup>1</sup>H NMR** (400 MHz, CDCl<sub>3</sub>) δ 7.40 – 7.35 (m, 0.79H, Ph alkene), 7.28 (d, *J* = 8.1 Hz, 2H), 7.21 (d, *J* = 8.1 Hz, 0.74H, Ph alkene), 7.19 – 7.14 (m, 2H), 7.05 (dt, *J* = 16.2, 2.6 Hz, 0.36H, CH alkene), 6.91 (dd, *J* = 12.6, 1.9 Hz, 1H), 6.26 (dt, *J* = 16.2, 11.5 Hz, 0.35H, CH alkene), 5.82 (q, *J* = 13.1 Hz, 1H), 4.35 (q, *J* = 7.1 Hz, 0.7H, CH<sub>2</sub> alkene), 4.03 (q, *J* = 7.2 Hz, 2H), 2.68 (d, *J* = 7.7 Hz, 0.69H, CH<sub>2</sub> alkene), 2.66 – 2.61 (m, 2H), 1.36 (t, *J* = 7.2 Hz, 1.12H, CH<sub>3</sub> alkene), 1.25 (s, 1.16H, CH<sub>3</sub> alkene), 1.21 (d, *J* = 7.6 Hz, 3H), 1.11 (t, *J* = 7.2 Hz, 3H).

**<sup>19</sup>F NMR** (376 MHz, Chloroform-*d*) δ -93.81, -103.08 (*E*-alkene).

**<sup>13</sup>C NMR** (101 MHz, Chloroform-*d*) δ 163.6 (t, <sup>2</sup>*J*<sub>C-F</sub> = 33.8 Hz), 146.4 (*E*-alkene), 145.3, 138.9 (t, <sup>4</sup>*J*<sub>C-F</sub> = 9.0 Hz), 136.9 (t, <sup>4</sup>*J*<sub>C-F</sub> = 9.4 Hz, *E*-alkene), 131.7 (*E*-alkene), 129.2 (t, <sup>3</sup>*J*<sub>C-F</sub> = 2.9 Hz), 128.5, 127.9, 127.6, 121.2 (t, <sup>2</sup>*J*<sub>C-F</sub> = 28.1 Hz), 118.0 (d, <sup>2</sup>*J*<sub>C-F</sub> = 25.0 Hz, *E*-alkene), 112.0 (t, <sup>1</sup>*J*<sub>C-F</sub> = 245.5 Hz), 63.2 (*E*-alkene), 63.0, 28.8 (*E*-alkene), 28.8, 15.6, 14.1 (*E*-alkene), 13.7.

Spectral Data was agreed with previously report.<sup>[22]</sup>

Ethyl (Z)-2,2-difluoro-4-(4-isopropylphenyl)but-3-enoate (**49**)

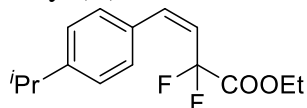

Purification by column chromatography over silica (n-pentane/ethyl acetate 80/1): 42.4 mg of colorless oil (79% yield) of *Z*-alkene/*E*-alkene mixture (74/26).

**<sup>1</sup>H NMR** (400 MHz, CDCl<sub>3</sub>) δ 7.39 (d, *J* = 8.2 Hz, 0.74H, Ph alkene), 7.29 (d, *J* = 8.2 Hz, 2H), 7.25 (d, *J* = 4.0 Hz, 0.62H, Ph alkene), 7.23 – 7.17 (m, 2H), 7.05 (dt, *J* = 16.2, 2.6 Hz, 0.36H, CH alkene), 6.91 (dt, *J* = 12.5, 1.8 Hz, 1H), 6.26 (dt, *J* = 16.2, 11.5 Hz, 0.34H, CH alkene), 5.82

(q,  $J = 13.0$  Hz, 1H), 4.34 (q,  $J = 7.2$  Hz, 0.7H, CH<sub>2</sub> alkene), 4.02 (q,  $J = 7.1$  Hz, 2H), 2.90 (dt,  $J = 13.9, 7.0$  Hz, 1H), 1.36 (t,  $J = 7.2$  Hz, 1.1H, CH<sub>3</sub> alkene), 1.26 (s, 2.1H, <sup>t</sup>Pr alkene), 1.23 (d,  $J = 6.8$  Hz, 6H), 1.09 (t,  $J = 7.2$  Hz, 3H).

<sup>19</sup>F NMR (376 MHz, Chloroform-*d*)  $\delta$  -93.65, -103.12 (*E*-alkene).

<sup>13</sup>C NMR (101 MHz, Chloroform-*d*)  $\delta$  164.2 (t,  $^2J_{C-F} = 35.4$  Hz, *E*-alkene), 163.6 (t,  $^2J_{C-F} = 33.8$  Hz), 151.0 (*E*-alkene), 149.9, 138.9 (t,  $^4J_{C-F} = 9.1$  Hz), 136.8 (t,  $^4J_{C-F} = 9.4$  Hz, *E*-alkene), 131.9 (*E*-alkene), 129.2 (t,  $^3J_{C-F} = 2.7$  Hz), 127.6, 127.1, 126.5, 121.2 (t,  $^2J_{C-F} = 28.1$  Hz), 117.9 (t,  $^2J_{C-F} = 25.0$  Hz, *E*-alkene), 112.5 (t,  $^1J_{C-F} = 245.4$  Hz), 63.2 (*E*-alkene), 63.0, 34.1 (*E*-alkene), 34.1, 24.0, 14.1 (*E*-alkene), 13.7.

Spectral Data was agreed with previously report.<sup>[22]</sup>

#### Ethyl (*Z*)-4-(4-(*tert*-butyl)phenyl)-2,2-difluorobut-3-enoate (**50**)

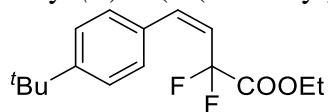

Purification by column chromatography over silica (n-pentane/ethyl acetate 80/1): 36.7 mg of colorless oil (65% yield) of *Z*-alkene/*E*-alkene mixture (71/29).

<sup>1</sup>H NMR (400 MHz, CDCl<sub>3</sub>)  $\delta$  7.38 – 7.35 (m, 2H), 7.30 (d,  $J = 8.4$  Hz, 2H), 7.06 (dt,  $J = 16.2, 2.6$  Hz, 0.39H, CH alkene), 6.91 (dt,  $J = 12.6, 1.8$  Hz, 1H), 6.29 – 6.23 (m, 0.28H, CH alkene), 5.83 (q,  $J = 13.0$  Hz, 0.77H, CH<sub>2</sub> alkene), 4.34 (q,  $J = 7.1$  Hz, 1H), 4.02 (q,  $J = 7.2$  Hz, 2H), 1.36 (t,  $J = 7.2$  Hz, 1.2H, CH<sub>3</sub> alkene), 1.32 (s, 3.38H, <sup>t</sup>Bu alkene), 1.31 (s, 9H), 1.09 (t,  $J = 7.2$  Hz, 3H).

<sup>19</sup>F NMR (376 MHz, Chloroform-*d*)  $\delta$  -93.64, -103.23 (*E*-alkene).

<sup>13</sup>C NMR (101 MHz, Chloroform-*d*)  $\delta$  163.6 (t,  $^2J_{C-F} = 33.8$  Hz), 153.2 (*E*-alkene), 152.2, 138.8 (t,  $^4J_{C-F} = 9.0$  Hz), 136.7 (t,  $^4J_{C-F} = 9.4$  Hz, *E*-alkene), 131.5 (*E*-alkene), 129.0 (t,  $^3J_{C-F} = 2.8$  Hz), 127.4, 125.9, 125.3, 121.2 (t,  $^2J_{C-F} = 28.2$  Hz), 118.0 (t,  $^2J_{C-F} = 25.0$  Hz, *E*-alkene), 112.5 (t,  $^1J_{C-F} = 245.4$  Hz), 63.2 (*E*-alkene), 63.0, 34.9 (*E*-alkene), 34.8, 31.5 (*E*-alkene), 31.3, 14.1 (*E*-alkene), 13.7.

Spectral Data was agreed with previously report.<sup>[23]</sup>

#### Ethyl (*Z*)-2,2-difluoro-4-(2-methoxyphenyl)but-3-enoate (**51**)

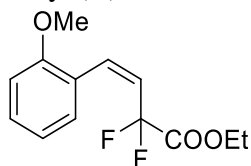

Purification by column chromatography over silica (n-pentane/ethyl acetate 80/1): 30.2 mg of colorless oil (59% yield) of *Z*-alkene/*E*-alkene mixture (78/22).

<sup>1</sup>H NMR (400 MHz, CDCl<sub>3</sub>)  $\delta$  7.34 – 7.25 (m, 2H), 7.05 (dd,  $J = 12.4, 1.9$  Hz, 1H), 6.92 (td,  $J = 7.5, 1.0$  Hz, 1H), 6.87 – 6.83 (m, 1H), 5.90 (q,  $J = 12.5$  Hz, 1H), 3.98 (q,  $J = 7.2$  Hz, 2H), 3.83 (s, 3H), 1.13 (t,  $J = 7.1$  Hz, 3H).

<sup>19</sup>F NMR (376 MHz, Chloroform-*d*)  $\delta$  -94.23.

<sup>13</sup>C NMR (101 MHz, Chloroform-*d*)  $\delta$  163.6 (t,  $^2J_{C-F} = 33.8$  Hz), 156.9, 134.8 (t,  $^4J_{C-F} = 9.2$  Hz), 130.6 (t,  $^3J_{C-F} = 3.3$  Hz), 130.5, 123.6, 122.1 (t,  $^2J_{C-F} = 27.7$  Hz), 120.3, 112.6 (t,  $^1J_{C-F} = 245.1$  Hz), 110.1, 62.9, 55.5, 13.7.

Spectral Data was agreed with previously report.<sup>[22]</sup>

Ethyl (Z)-4-(3,5-dimethoxyphenyl)-2,2-difluorobut-3-enoate (**52**)

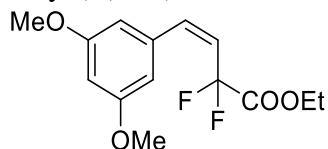

Purification by column chromatography over silica (n-pentane/ethyl acetate 80/1): 32.6 mg of colorless oil (57% yield) of *Z*-alkene/*E*-alkene mixture (76/24).

**<sup>1</sup>H NMR** (400 MHz, CDCl<sub>3</sub>) δ 6.88 (dt, *J* = 12.6, 1.7 Hz, 1H), 6.50 (d, *J* = 2.3 Hz, 2H), 6.42 (t, *J* = 2.3 Hz, 1H), 5.86 (q, *J* = 12.7 Hz, 1H), 4.05 (q, *J* = 7.2 Hz, 2H), 3.80 (s, 6H), 1.13 (t, *J* = 7.2 Hz, 3H).

**<sup>19</sup>F NMR** (376 MHz, Chloroform-*d*) δ -93.28.

**<sup>13</sup>C NMR** (101 MHz, Chloroform-*d*) δ 163.3 (t, <sup>2</sup>*J*<sub>C-F</sub> = 33.7 Hz), 160.5, 138.6 (t, <sup>4</sup>*J*<sub>C-F</sub> = 9.4 Hz), 136.0, 122.3 (t, <sup>2</sup>*J*<sub>C-F</sub> = 28.5 Hz), 112.2 (t, <sup>1</sup>*J*<sub>C-F</sub> = 245.2 Hz), 106.6 (t, <sup>5</sup>*J*<sub>C-F</sub> = 2.8 Hz), 101.3, 63.0, 55.4, 13.6.

Spectral Data was agreed with previously report.<sup>[24]</sup>

Ethyl (Z)-2,2-difluoro-4-(4-fluorophenyl)but-3-enoate (**53**)

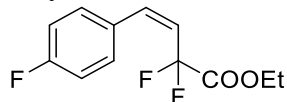

Purification by column chromatography over silica (n-pentane/ethyl acetate 80/1): 38.1 mg of colorless oil (78% yield) of *Z*-alkene/*E*-alkene mixture (73/27).

**<sup>1</sup>H NMR** (400 MHz, CDCl<sub>3</sub>) δ 7.40 – 7.32 (m, 2H), 7.09 – 6.99 (m, 2H), 6.89 (dt, *J* = 12.7, 2.0 Hz, 1H), 5.86 (q, *J* = 13.2 Hz, 1H), 4.10 (q, *J* = 7.1 Hz, 2H), 1.18 (t, *J* = 7.2 Hz, 3H).

**<sup>19</sup>F NMR** (376 MHz, Chloroform-*d*) δ -94.67, -112.07.

**<sup>13</sup>C NMR** (101 MHz, Chloroform-*d*) δ 163.6 (t, <sup>2</sup>*J*<sub>C-F</sub> = 33.7 Hz), 163.0 (d, <sup>1</sup>*J*<sub>C-F</sub> = 249.3 Hz), 137.8 (t, <sup>4</sup>*J*<sub>C-F</sub> = 8.6 Hz), 131.1 (dt, <sup>3</sup>*J*<sub>C-F</sub> = 8.2, 3.0 Hz), 122.2 – 121.5 (m), 115.5, 115.3, 112.3 (t, <sup>1</sup>*J*<sub>C-F</sub> = 246.6 Hz), 63.2, 13.8.

Spectral Data was agreed with previously report.<sup>[22,23]</sup>

Ethyl (Z)-2,2-difluoro-4-(3-fluorophenyl)but-3-enoate (**54**)

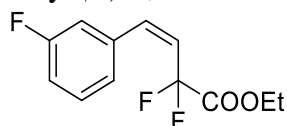

Purification by column chromatography over silica (n-pentane/ethyl acetate 80/1): 36.6 mg of colorless oil (75% yield) of *Z*-alkene/*E*-alkene mixture (71/29).

**<sup>1</sup>H NMR** (400 MHz, CDCl<sub>3</sub>) δ 7.34 (s, 0.35H, Ph alkene), 7.34 – 7.28 (m, 1H), 7.23 (dt, *J* = 7.7, 1.2 Hz, 0.39H, Ph alkene), 7.18 – 7.14 (m, 0.4H, Ph alkene), 7.14 – 7.11 (m, 1H), 7.07 (s, 1H), 7.06 (d, *J* = 2.7 Hz, 0.26H, Ph alkene), 7.05 – 7.01 (m, 1H), 7.01 – 6.98 (m, 0.26H, CH alkene), 6.91 (dt, *J* = 12.5, 2.0 Hz, 1H), 6.31 (dt, *J* = 16.2, 11.4 Hz, 0.37H, CH alkene), 5.92 (q, *J* = 13.1 Hz, 1H), 4.36 (q, *J* = 7.1 Hz, 0.76H, CH<sub>2</sub> alkene), 4.11 (q, *J* = 7.2 Hz, 2H), 1.37 (t, *J* = 7.2 Hz, 1.1H, CH<sub>3</sub> alkene), 1.19 (t, *J* = 7.2 Hz, 3H).

**<sup>19</sup>F NMR** (376 MHz, Chloroform-*d*) δ -94.85, -103.65 (*E*-alkene), -112.58 (*E*-alkene), -112.95.

**<sup>13</sup>C NMR** (101 MHz, Chloroform-*d*) δ 163.0 (d, <sup>1</sup>*J*<sub>C-F</sub> = 246.7 Hz, *E*-alkene), 163.3 (t, <sup>2</sup>*J*<sub>C-F</sub> = 32.0 Hz), 162.4 (d, <sup>1</sup>*J*<sub>C-F</sub> = 246.3 Hz), 137.4 (td, <sup>4</sup>*J*<sub>C-F</sub> = 8.6, 2.3 Hz), 136.3 (*E*-alkene), 130.4 (d,

$^3J_{C-F} = 8.4$  Hz, *E*-alkene), 129.8 (d,  $^3J_{C-F} = 8.3$  Hz), 124.8 (q,  $^3J_{C-F} = 2.9$  Hz), 123.5 (*E*-alkene), 122.9 (t,  $^4J_{C-F} = 27.8$  Hz), 120.2 (t,  $^4J_{C-F} = 25.0$  Hz, *E*-alkene), 116.6 (d,  $^2J_{C-F} = 21.3$  Hz, *E*-alkene), 115.8 (dt,  $^2J_{C-F} = 22.4$ , 3.1 Hz), 115.7 (d,  $^2J_{C-F} = 21.1$  Hz), 113.9 (d,  $^2J_{C-F} = 21.8$  Hz, *E*-alkene), 112.4 (*E*-alkene), 112.1 (t,  $^1J_{C-F} = 246.9$  Hz), 63.3 (*E*-alkene), 63.1, 14.0 (*E*-alkene), 13.7.

Spectral Data was agreed with previously report.<sup>[24]</sup>

Ethyl (*Z*)-2,2-difluoro-4-(2-fluorophenyl)but-3-enoate (**55**)

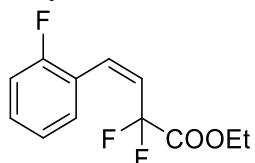

Purification by column chromatography over silica (n-pentane/ethyl acetate 80/1): 31.8 mg of colorless oil (65% yield) of *Z*-alkene/*E*-alkene mixture (86/14).

**$^1H$  NMR** (400 MHz,  $CDCl_3$ )  $\delta$  7.47 (td,  $J = 7.6$ , 1.8 Hz, 0.17H, Ph alkene), 7.43 – 7.36 (m, 1H), 7.32 (tdd,  $J = 7.4$ , 5.2, 1.8 Hz, 1H), 7.21 (dt,  $J = 16.4$ , 2.7 Hz, 0.18H, Ph alkene), 7.17 (dd,  $J = 7.7$ , 1.2 Hz, 0.14H, Ph alkene), 7.12 (td,  $J = 7.6$ , 1.2 Hz, 1H), 7.05 (ddd,  $J = 9.7$ , 8.3, 1.2 Hz, 1H), 6.98 (dd,  $J = 12.5$ , 2.0 Hz, 1H), 6.43 (dt,  $J = 16.4$ , 11.3 Hz, 0.16H, CH alkene), 6.00 (q,  $J = 13.0$  Hz, 1H), 4.36 (q,  $J = 7.1$  Hz, 0.31H,  $CH_2$  alkene), 4.11 (q,  $J = 7.2$  Hz, 2H), 1.37 (t,  $J = 7.1$  Hz, 0.48H,  $CH_3$  alkene), 1.20 (t,  $J = 7.2$  Hz, 3H).

**$^{19}F$  NMR** (376 MHz, Chloroform-*d*)  $\delta$  -96.09 (d,  $J = 3.0$  Hz), -103.73(*E*-alkene), -114.00 (d,  $J = 2.3$  Hz), -115.65(*E*-alkene).

**$^{13}C$  NMR** (101 MHz, Chloroform-*d*)  $\delta$  163.4 (t,  $^2J_{C-F} = 33.7$  Hz), 160.0 (d,  $^1J_{C-F} = 249.0$  Hz), 131.6 (td,  $^4J_{C-F} = 8.5$ , 4.0 Hz), 131.3 (d,  $^3J_{C-F} = 8.6$  Hz, *E*-alkene), 130.9 (q,  $^4J_{C-F} = 4.4$ , 3.8 Hz, *E*-alkene), 130.8 (d,  $^3J_{C-F} = 8.4$  Hz), 128.7, 124.5 (d,  $^4J_{C-F} = 3.7$  Hz, *E*-alkene), 124.1 (t,  $^2J_{C-F} = 27.4$  Hz), 123.9 (d,  $^4J_{C-F} = 3.7$  Hz), 122.4 (d,  $^2J_{C-F} = 14.2$  Hz), 121.5 (d,  $^2J_{C-F} = 6.4$  Hz, *E*-alkene), 116.3 (d,  $^2J_{C-F} = 22.0$  Hz), 115.3 (d,  $^2J_{C-F} = 21.5$  Hz, *E*-alkene), 112.3 (t,  $^1J_{C-F} = 246.8$  Hz), 63.4 (*E*-alkene), 63.2, 14.1 (*E*-alkene), 13.8.

Spectral Data was agreed with previously report.<sup>[22, 24]</sup>

Ethyl (*Z*)-4-(2-chlorophenyl)-2,2-difluorobut-3-enoate (**56**)

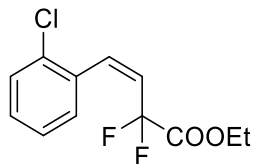

Purification by column chromatography over silica (n-pentane/ethyl acetate 80/1): 34.9 mg of colorless oil (67% yield) of *Z*-alkene/*E*-alkene mixture (88/12).

**$^1H$  NMR** (400 MHz,  $CDCl_3$ )  $\delta$  7.42 – 7.33 (m, 2H), 7.26 (td,  $J = 7.0$ , 1.9 Hz, 2H), 7.03 (dt,  $J = 12.3$ , 1.9 Hz, 1H), 6.01 (q,  $J = 12.3$  Hz, 1H), 4.01 (q,  $J = 7.2$  Hz, 2H), 1.18 (t,  $J = 7.2$  Hz, 3H).

**$^{19}F$  NMR** (376 MHz, Chloroform-*d*)  $\delta$  -94.68.

**$^{13}C$  NMR** (101 MHz, Chloroform-*d*)  $\delta$  163.1 (t,  $^2J_{C-F} = 33.7$  Hz), 135.9 (t,  $^4J_{C-F} = 8.9$  Hz), 133.1 (d,  $^5J_{C-F} = 2.1$  Hz), 132.9, 131.0 (t,  $^3J_{C-F} = 3.4$  Hz), 130.0, 129.0, 126.5, 123.7 (t,  $^2J_{C-F} = 27.7$  Hz), 112.0 (t,  $^1J_{C-F} = 246.3$  Hz), 63.1, 13.6.

Spectral Data was agreed with previously report.<sup>[22, 24]</sup>

Ethyl (Z)-4-(4-bromophenyl)-2,2-difluorobut-3-enoate (**57**)

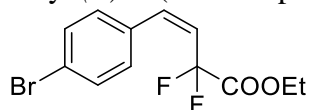

Purification by column chromatography over silica (n-pentane/ethyl acetate 80/1): 50.1 mg of colorless oil (82% yield) of *Z*-alkene/*E*-alkene mixture (71/29).

**<sup>1</sup>H NMR** (400 MHz, CDCl<sub>3</sub>) δ 7.51 (d, *J* = 8.5 Hz, 0.64H, Ph alkene), 7.47 (d, *J* = 8.5 Hz, 1H), 7.32 (d, *J* = 8.5 Hz, 0.77H, Ph alkene), 7.24 (dd, *J* = 9.1, 7.0 Hz, 2H), 7.02 (dt, *J* = 16.2, 2.6 Hz, 0.37H, CH alkene), 6.86 (dd, *J* = 12.6, 2.0 Hz, 1H), 6.30 (dt, *J* = 16.2, 11.3 Hz, 0.36H, CH alkene), 5.90 (dt, *J* = 26.2, 13.4 Hz, 1H), 4.36 (q, *J* = 7.2 Hz, 0.73H, CH<sub>2</sub> alkene), 4.12 (q, *J* = 7.1 Hz, 2H), 1.37 (t, *J* = 7.1 Hz, 1.04H, CH<sub>3</sub> alkene), 1.19 (t, *J* = 7.2 Hz, 3H).

**<sup>19</sup>F NMR** (376 MHz, Chloroform-*d*) δ -95.05, -103.46 (*E*-alkene).

**<sup>13</sup>C NMR** (101 MHz, Chloroform-*d*) δ 163.3 (t, <sup>2</sup>*J*<sub>C-F</sub> = 33.8 Hz), 137.5 (t, <sup>4</sup>*J*<sub>C-F</sub> = 8.4 Hz), 135.6 (t, <sup>4</sup>*J*<sub>C-F</sub> = 9.5 Hz, *E*-alkene), 133.1, 132.1, 131.4, 130.6 (t, <sup>3</sup>*J*<sub>C-F</sub> = 3.0 Hz), 128.9, 123.0, 122.4 (t, <sup>2</sup>*J*<sub>C-F</sub> = 27.6 Hz), 119.5 (t, <sup>2</sup>*J*<sub>C-F</sub> = 25.0 Hz, *E*-alkene), 112.1 (t, <sup>1</sup>*J*<sub>C-F</sub> = 247.0 Hz), 63.3 (*E*-alkene), 63.2, 14.0 (*E*-alkene), 13.7.

Spectral Data was agreed with previously report.<sup>[22, 23, 24]</sup>

Ethyl (Z)-2,2-difluoro-4-(4-(trifluoromethyl)phenyl)but-3-enoate (**58**)

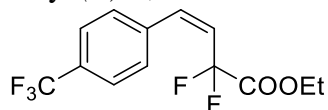

Purification by column chromatography over silica (n-pentane/ethyl acetate 80/1): 48.8 mg of colorless oil (83% yield) of *Z*-alkene/*E*-alkene mixture (74/26).

**<sup>1</sup>H NMR** (400 MHz, CDCl<sub>3</sub>) δ 7.64 (d, *J* = 8.2 Hz, 0.65H, Ph alkene), 7.61 (d, *J* = 8.1 Hz, 2H), 7.56 (d, *J* = 8.1 Hz, 0.7H, Ph alkene), 7.47 (d, *J* = 8.1 Hz, 2H), 7.12 (d, *J* = 16.1 Hz, 0.35H, CH alkene), 6.97 (d, *J* = 12.6 Hz, 1H), 6.40 (d, *J* = 16.2 Hz, 0.34H, CH alkene), 5.97 (q, *J* = 13.3 Hz, 1H), 4.37 (q, *J* = 7.2 Hz, 0.69H, CH<sub>2</sub> alkene), 4.12 (q, *J* = 7.2 Hz, 2H), 1.37 (t, *J* = 7.2 Hz, 1.09H, CH<sub>3</sub> alkene), 1.19 (t, *J* = 7.2 Hz, 3H).

**<sup>19</sup>F NMR** (376 MHz, Chloroform-*d*) δ -62.81, -95.53 (*E*-alkene), -103.78.

**<sup>13</sup>C NMR** (101 MHz, Chloroform-*d*) δ 163.4 (t, <sup>2</sup>*J*<sub>C-F</sub> = 33.8 Hz), 137.9, 137.3 (t, <sup>4</sup>*J*<sub>C-F</sub> = 8.1 Hz), 135.5 (t, <sup>4</sup>*J*<sub>C-F</sub> = 9.4 Hz, *E*-alkene) 134.8 – 133.9 (m, *E*-alkene), 130.6 (q, <sup>2</sup>*J*<sub>C-F</sub> = 32.6 Hz), 129.3 (t, <sup>3</sup>*J*<sub>C-F</sub> = 3.0 Hz), 127.8 (s, *E*-alkene), 126.0 (q, <sup>1</sup>*J*<sub>C-F</sub> = 3.7 Hz, *E*-alkene), 125.2 (q, <sup>1</sup>*J*<sub>C-F</sub> = 3.8 Hz), 123.8 (t, <sup>2</sup>*J*<sub>C-F</sub> = 27.4 Hz), 121.5 (t, <sup>2</sup>*J*<sub>C-F</sub> = 25.1 Hz), 112.5, 112.1 (t, <sup>1</sup>*J*<sub>C-F</sub> = 247.5 Hz), 63.5 (*E*-alkene), 63.3, 14.1 (*E*-alkene), 13.8.

Spectral Data was agreed with previously report.<sup>[22]</sup>

Methyl (Z)-4-(4-ethoxy-3,3-difluoro-4-oxobut-1-en-1-yl)benzoate (**59**)

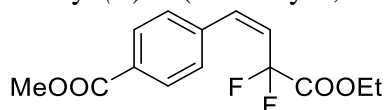

Purification by column chromatography over silica (n-pentane/ethyl acetate 80/1): 50.6 mg of colorless oil (89% yield) of *Z*-alkene/*E*-alkene mixture (77/23).

**<sup>1</sup>H NMR** (400 MHz, CDCl<sub>3</sub>) δ 8.16 – 8.03 (m, 0.46H, Ph alkene), 8.00 (dd, *J* = 7.5, 1.4 Hz, 2H), 7.64 (dt, *J* = 7.8, 1.5 Hz, 0.3H, Ph alkene), 7.61 – 7.56 (m, 1H), 7.48 (d, *J* = 7.8 Hz, 0.28H, Ph alkene), 7.46 – 7.41 (m, 1H), 7.12 (d, *J* = 16.2 Hz, 0.29H, CH alkene), 6.97 (dt, *J* = 12.6, 2.1 Hz,

1H), 6.40 (d,  $J = 16.2$  Hz, 0.29H, CH alkene), 5.94 (td,  $J = 13.5, 12.5$  Hz, 1H), 4.37 (q,  $J = 7.1$  Hz, 0.58H, CH<sub>2</sub> alkene), 4.11 (q,  $J = 7.2$  Hz, 2H), 3.95 (s, 0.79H, COOMe alkene), 3.93 (s, 3H), 1.38 (t,  $J = 7.2$  Hz, 0.9H, CH<sub>3</sub> alkene), 1.19 (t,  $J = 7.1$  Hz, 3H).

<sup>19</sup>F NMR (376 MHz, Chloroform-*d*)  $\delta$  -95.37, -103.57 (*E*-alkene).

<sup>13</sup>C NMR (101 MHz, Chloroform-*d*)  $\delta$  166.7, 166.7 (*E*-alkene), 163.5 (t,  $^2J_{C-F} = 33.7$  Hz), 137.8 (t,  $^4J_{C-F} = 8.2$  Hz), 136.0 (t,  $^4J_{C-F} = 9.6$  Hz, *E*-alkene), 134.7, 133.3 (t,  $^3J_{C-F} = 3.3$  Hz, *E*-alkene), 130.7 (*E*-alkene), 130.3, 130.2 (t,  $^3J_{C-F} = 2.6$  Hz), 129.8, 129.1 (*E*-alkene), 128.5, 123.0 (t,  $^2J_{C-F} = 27.4$  Hz), 120.1 (d,  $^2J_{C-F} = 25.0$  Hz, *E*-alkene), 112.2 (t,  $^1J_{C-F} = 247.2$  Hz), 63.4 (*E*-alkene), 63.3, 52.5 (*E*-alkene), 52.4, 14.1 (*E*-alkene), 13.8.

Spectral Data was agreed with previously report.<sup>[22]</sup>

#### Ethyl (*Z*)-4-([1,1'-biphenyl]-4-yl)-2,2-difluorobut-3-enoate (**60**)

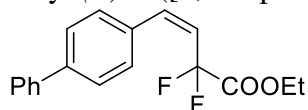

Purification by column chromatography over silica (n-pentane/ethyl acetate 80/1): 48.4 mg of colorless oil (80% yield) of *Z*-alkene/*E*-alkene mixture (78/22).

<sup>1</sup>H NMR (400 MHz, CDCl<sub>3</sub>)  $\delta$  7.62 – 7.57 (m, 4H), 7.48 – 7.43 (m, 4H), 7.40 – 7.34 (m, 1H), 6.97 (dt,  $J = 12.6, 1.9$  Hz, 1H), 5.90 (q,  $J = 13.2$  Hz, 1H), 4.08 (q,  $J = 7.1$  Hz, 2H), 1.15 (t,  $J = 7.1$  Hz, 3H).

<sup>19</sup>F NMR (376 MHz, Chloroform-*d*)  $\delta$  -94.15.

<sup>13</sup>C NMR (101 MHz, Chloroform-*d*)  $\delta$  163.6 (t,  $^2J_{C-F} = 34.3$  Hz), 141.6, 140.4, 138.5 (t,  $^4J_{C-F} = 8.7$  Hz), 133.3, 129.7 (t,  $^3J_{C-F} = 2.9$  Hz), 129.0, 127.8, 127.2, 127.0, 121.9 (t,  $^2J_{C-F} = 28.0$  Hz), 112.5 (t,  $^1J_{C-F} = 247.1$  Hz), 63.2, 13.8.

Spectral Data was agreed with previously report.<sup>[22, 24]</sup>

#### Ethyl (*Z*)-2,2-difluoro-4-(thiophen-2-yl)but-3-enoate (**61**)

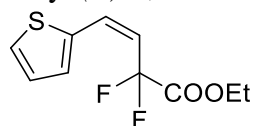

Purification by column chromatography over silica (n-pentane/ethyl acetate 80/1): 20.0 mg of colorless oil (43% yield) of *Z*-alkene/*E*-alkene mixture (83/17).

<sup>1</sup>H NMR (400 MHz, CDCl<sub>3</sub>)  $\delta$  7.48 (dt,  $J = 3.1, 1.1$  Hz, 1H), 7.29 (dd,  $J = 5.0, 3.0$  Hz, 1H), 7.21 (dd,  $J = 5.0, 1.3$  Hz, 1H), 6.82 (dt,  $J = 12.8, 2.1$  Hz, 1H), 5.76 (td,  $J = 13.9, 12.6$  Hz, 1H), 4.19 (q,  $J = 7.1$  Hz, 2H), 1.21 (t,  $J = 7.2$  Hz, 3H).

<sup>19</sup>F NMR (376 MHz, Chloroform-*d*)  $\delta$  -95.84.

<sup>13</sup>C NMR (101 MHz, Chloroform-*d*)  $\delta$  163.7 (t,  $^2J_{C-F} = 34.3$  Hz), 135.2, 132.3 (t,  $^3J_{C-F} = 8.6$  Hz), 128.7 (t,  $^6J_{C-F} = 3.6$  Hz), 127.8 (t,  $^5J_{C-F} = 3.8$  Hz), 125.9, 120.0 (t,  $^2J_{C-F} = 28.3$  Hz), 112.6 (t,  $^1J_{C-F} = 246.5$  Hz), 63.2, 13.9.

Spectral Data was agreed with previously report.<sup>[22, 24]</sup>

#### (2,2-diphenylethyl)(methyl)diphenylsilane (**67**)

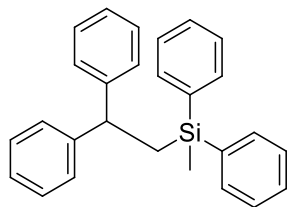

Purification by column chromatography over silica (n-pentane/ethyl acetate 100/1): 49.1 mg of colorless solid (65% yield).<sup>13</sup>

<sup>1</sup>H NMR (400 MHz, CDCl<sub>3</sub>) δ 7.36 – 7.30 (m, 4H), 7.28 – 7.18 (m, 6H), 7.13 – 7.05 (m, 8H), 7.02 (dd, *J* = 6.1, 2.5 Hz, 2H), 3.97 (t, *J* = 7.9 Hz, 1H), 1.87 (d, *J* = 7.9 Hz, 2H), -0.00 (s, 3H). Spectral Data was agreed with previously report.<sup>[25]</sup>

Methyl (*Z*)-4-(3-acetoxyhex-1-en-1-yl)benzoate (**71**)

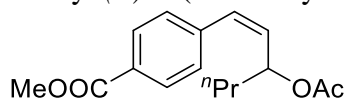

Purification by column chromatography over silica (n-pentane/ethyl acetate 100/1): 32.6 mg of colorless oil (59% yield) of *Z*-alkene/*E*-alkene mixture (25/75).

<sup>1</sup>H NMR (400 MHz, CDCl<sub>3</sub>) δ 8.02 (d, *J* = 8.4 Hz, 2H), 7.39 (d, *J* = 8.1 Hz, 2H), 6.58 (d, *J* = 10.4 Hz, 1H), 5.73 – 5.63 (m, 2H), 3.92 (s, 3H), 2.03 (s, 3H), 1.71 (dd, *J* = 14.4, 6.8 Hz, 1H), 1.59 – 1.50 (m, 1H), 1.30 (dt, *J* = 15.2, 7.6 Hz, 2H), 0.86 (t, *J* = 7.4 Hz, 3H).

<sup>13</sup>C NMR (101 MHz, Chloroform-*d*) δ 170.5, 167.0, 141.3, 132.4, 130.7, 129.8, 128.9, 128.7, 71.0, 52.3, 36.9, 21.4, 18.4, 14.0.

HRMS (ESI) Calcd for C<sub>16</sub>H<sub>20</sub>O<sub>4</sub>Na [M+Na]<sup>+</sup>: 299.1254, found 299.1250.

1,1-difluoro-2-phenylhept-1-en-4-yl acetate (**73**)

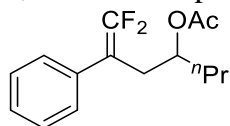

Purification by column chromatography over silica (n-pentane/ethyl acetate 100/1): 40.8 mg of colorless oil (76% yield).

<sup>1</sup>H NMR (400 MHz, CDCl<sub>3</sub>) δ 7.38 – 7.23 (m, 5H), 4.89 (tt, *J* = 7.2, 5.2 Hz, 1H), 2.65 (dtd, *J* = 7.5, 2.7, 1.9 Hz, 2H), 1.81 (s, 3H), 1.58 – 1.45 (m, 2H), 1.36 – 1.23 (m, 2H), 0.86 (t, *J* = 7.3 Hz, 3H).

<sup>19</sup>F NMR (376 MHz, Chloroform-*d*) δ -90.08 (d, *J* = 39.6 Hz), -90.35 (d, *J* = 39.6 Hz).

<sup>13</sup>C NMR (101 MHz, Chloroform-*d*) δ 170.7, 154.5 (dd, <sup>1</sup>*J*<sub>C-F</sub> = 291.1, 288.0 Hz), 133.7 – 133.5 (m), 128.6, 128.4 (t, <sup>4</sup>*J*<sub>C-F</sub> = 3.1 Hz), 127.5, 89.5 (dd, <sup>2</sup>*J*<sub>C-F</sub> = 21.1, 15.3 Hz), 72.4 (t, <sup>4</sup>*J*<sub>C-F</sub> = 2.9 Hz), 36.0, 32.6 (d, <sup>3</sup>*J*<sub>C-F</sub> = 1.8 Hz), 20.9, 18.6, 14.0.

HRMS (ESI) Calcd for C<sub>15</sub>H<sub>18</sub>F<sub>2</sub>O<sub>2</sub>Na [M+Na]<sup>+</sup>: 291.1167, found 291.1164

## 6. Reference

[1] J. Luo, J. Zhang, *ACS Catal.* **2016**, *6*, 873–877.

[2] (a) C. Lee, W. Yang, R. G. Parr, *Phys. Rev. B* **1988**, *37*, 785; (b) A. D. Becke, *J. Chem. Phys.* **1993**, *98*, 5648; (c) S. Grimme, J. Antony, S. Ehrlich, H. Krieg, H-Pu. *J. Chem. Phys.* **2010**, *132*, 154104.

[3] K. Eichkorn, F. Weigend, O. Treutler, R. *Theor. Chem. Acc.* **1997**, *97*, 119.



- [4] F. Weigend, M. Häser, H. Patzelt, R. Ahlrichs, *Chem. Phys. Lett.* **1998**, *294*, 143.
- [5] Gaussian 16, Revision C.01, M. J. Frisch, G. W. Trucks, H. B. Schlegel, G. E. Scuseria, M. A. Robb, J. R. Cheeseman, G. Scalmani, V. Barone, G. A. Petersson, H. Nakatsuji, X. Li, M. Caricato, A. V. Marenich, J. Bloino, B. G. Janesko, R. Gomperts, B. Mennucci, H. P. Hratchian, J. V. Ortiz, A. F. Izmaylov, J. L. Sonnenberg, D. Williams-Young, F. Ding, F. Lipparini, F. Egidi, J. Goings, B. Peng, A. Petrone, T. Henderson, D. Ranasinghe, V. G. Zakrzewski, J. Gao, N. Rega, G. Zheng, W. Liang, M. Hada, M. Ehara, K. Toyota, R. Fukuda, J. Hasegawa, M. Ishida, T. Nakajima, Y. Honda, O. Kitao, H. Nakai, T. Vreven, K. Throssell, J. A. Montgomery, Jr., J. E. Peralta, F. Ogliaro, M. J. Bearpark, J. J. Heyd, E. N. Brothers, K. N. Kudin, V. N. Staroverov, T. A. Keith, R. Kobayashi, J. Normand, K. Raghavachari, A. P. Rendell, J. C. Burant, S. S. Iyengar, J. Tomasi, M. Cossi, J. M. Millam, M. Klene, C. Adamo, R. Cammi, J. W. Ochterski, R. L. Martin, K. Morokuma, O. Farkas, J. B. Foresman, and D. J. Fox, Gaussian, Inc., Wallingford CT, **2016**.
- [6] C. Y. Legault, CYLView, version 20; Universite de Sherbrooke, Sherbrooke, Quebec, Canada, **2020**.
- [7] N.-X. Xu, B.-X. Li, C. Wang, M. Uchiyama, *Angew. Chem. Int. Ed.* **2020**, *59*, 10639–10644.
- [8] C. Zhu, S.-C. Lee, H. Chen, H. Yue, M. Rueping, *Angew. Chem. Int. Ed.* **2022**, *61*, e202204212.
- [9] P.-J. Xia, Z.-P. Ye, Y.-Z. Hu, D. Song, H.-Y. Xiang, X.-Q. Chen, H. Yang, *Org. Lett.* **2019**, *21*, 2658–2662.
- [10] A. Jordan, K. D. Whymark, J. Sydenham, H. F. Sneddon, *Green Chem.*, **2021**, *23*, 6405.
- [11] Z. Zhang, X. Jiang, *Org. Lett.* **2014**, *17*, 4400–4403.
- [12] A. Tlahuext-Aca, R. A. Garza-Sanchez, M. Schäfer, F. Glorius. *Org. Lett.* **2018**, *20*, 1546-1549.
- [13] Y. Li, M. Lei, L. Gong. *Nat. Catal.* **2019**, *2*, 1016-1026.
- [14] E. E. Wegner, A. W. Adamson. Chemical actinometry in the long wavelength visible region. *J. Am. Chem. Soc.* **1966**, *88*, 394-404.
- [15] J. N. Demas, W. D. Bowman, E. F. Zalewski, R. A. Velapoldi. *J. Phys. Chem.* **1981** *85*, 2766-2771.
- [16] A. Tlahuext-Ace, L. Candish, R. A. Garza-Sanchez, F. Glorius. *ACS Catal.* **2018**, *8*, 1715-1719.
- [17] A. Hu, J.-J. Guo, H. Pan, Z. Zuo. *Science.* **2018**, *361*, 668-672.
- [18] Z.-W. Hou, T. Jiang, T.-X. Wu, L. Wang. *Org. Lett.* **2021**, *23*, 8585–8589.
- [19] W.-K. Tang, Z.-W. Xu, J. Xu, F. Tang, X.-X. Li, J.-J. Dai, H.-J. Xu, Y.-S. Feng. *Org. Lett.* **2019**, *21*, 196–200.
- [20] Z.-Y. Wang, J.-H. Wan, G.-Y. Wang, R.-X. Jin, Q. Lan, X.-S. Wang, *Chem. Asian J.* **2018**, *13*, 261–265.
- [21] M. Yu, K. Niu, Z. Wang, Y. Liu, Q. Wang. *Org. Lett.* **2022**, *24*, 7622–7626.
- [22] J. Hao, W. Ding, Z. Zheng, L. Sun, J. Dong, M. Li, W. Wan. *J. Org. Chem.* **2022**, *87*, 13828–13836.
- [23] W.-W. Xu, L. Wang, T. Mao, J. Gu, X.-F. Li, C.-Y. He. *Molecules.* **2020**, *25*, 508.
- [24] H.-R. Zhang, D.-Q. Chen, Y.-P. Han, Y.-F. Qiu, D.-P. Jin, X.-Y. Liu. *Chem. Commun.* **2016**, *52*, 11827–11830
- [25] Alwyn G. Evans, M. Ll. Jones, N. H. Rees, *J. Chem. Soc. B*, **1967**, 961-964

## 7. Copies of NMR spectra of products

$^1\text{H}$  NMR (400 MHz,  $\text{CDCl}_3$ ) spectrum of compound **3**

7.55  
7.54  
7.53  
7.52  
7.51  
7.50  
7.49  
7.48  
7.47  
7.46  
7.45  
7.44  
7.43  
7.42  
7.41  
7.40  
7.39  
7.38  
7.37  
7.36  
7.35  
7.34  
7.33  
7.32  
7.31  
7.30  
7.29  
7.28  
7.27  
7.26  
7.25  
7.24  
7.23  
7.22  
7.21  
7.20  
7.19  
7.18  
7.17  
7.16  
7.15  
7.14  
7.13  
7.12  
7.11  
7.10  
7.09  
7.08  
7.07  
7.06  
7.05  
7.04  
7.03  
7.02  
7.01  
7.00  
6.99  
6.98  
6.97  
6.96  
6.95  
6.94  
6.93  
6.92  
6.91  
6.90  
6.89  
6.88  
6.87  
6.86  
6.85  
6.84  
6.83  
6.82  
6.81  
6.80  
6.79  
6.78  
6.77  
6.76  
6.75  
6.74  
6.73  
6.72  
6.71  
6.70  
6.69  
6.68  
6.67  
6.66  
6.65  
6.64  
6.63  
6.62  
6.61  
6.60  
6.59  
6.58  
6.57  
6.56  
6.55  
6.54  
6.53  
6.52  
6.51  
6.50  
6.49  
6.48  
6.47  
6.46  
6.45  
6.44  
6.43  
6.42  
6.41  
6.40  
6.39  
6.38  
6.37  
6.36  
6.35  
6.34  
6.33  
6.32  
6.31  
6.30  
6.29  
6.28  
6.27  
6.26  
6.25  
6.24  
6.23  
6.22  
6.21  
6.20  
6.19  
6.18  
6.17  
6.16  
6.15  
6.14  
6.13  
6.12  
6.11  
6.10  
6.09  
6.08  
6.07  
6.06  
6.05  
6.04  
6.03  
6.02  
6.01  
6.00  
5.99  
5.98  
5.97  
5.96  
5.95  
5.94  
5.93  
5.92  
5.91  
5.90  
5.89  
5.88  
5.87  
5.86  
5.85  
5.84  
5.83  
5.82  
5.81  
5.80  
5.79  
5.78  
5.77  
5.76  
5.75  
5.74  
5.73  
5.72  
5.71  
5.70  
5.69  
5.68  
5.67  
5.66  
5.65  
5.64  
5.63  
5.62  
5.61  
5.60  
5.59  
5.58  
5.57  
5.56  
5.55  
5.54  
5.53  
5.52  
5.51  
5.50  
5.49  
5.48  
5.47  
5.46  
5.45  
5.44  
5.43  
5.42  
5.41  
5.40  
5.39  
5.38  
5.37  
5.36  
5.35  
5.34  
5.33  
5.32  
5.31  
5.30  
5.29  
5.28  
5.27  
5.26  
5.25  
5.24  
5.23  
5.22  
5.21  
5.20  
5.19  
5.18  
5.17  
5.16  
5.15  
5.14  
5.13  
5.12  
5.11  
5.10  
5.09  
5.08  
5.07  
5.06  
5.05  
5.04  
5.03  
5.02  
5.01  
5.00  
4.99  
4.98  
4.97  
4.96  
4.95  
4.94  
4.93  
4.92  
4.91  
4.90  
4.89  
4.88  
4.87  
4.86  
4.85  
4.84  
4.83  
4.82  
4.81  
4.80  
4.79  
4.78  
4.77  
4.76  
4.75  
4.74  
4.73  
4.72  
4.71  
4.70  
4.69  
4.68  
4.67  
4.66  
4.65  
4.64  
4.63  
4.62  
4.61  
4.60  
4.59  
4.58  
4.57  
4.56  
4.55  
4.54  
4.53  
4.52  
4.51  
4.50  
4.49  
4.48  
4.47  
4.46  
4.45  
4.44  
4.43  
4.42  
4.41  
4.40  
4.39  
4.38  
4.37  
4.36  
4.35  
4.34  
4.33  
4.32  
4.31  
4.30  
4.29  
4.28

1.35  
1.33  
1.31

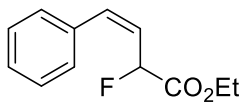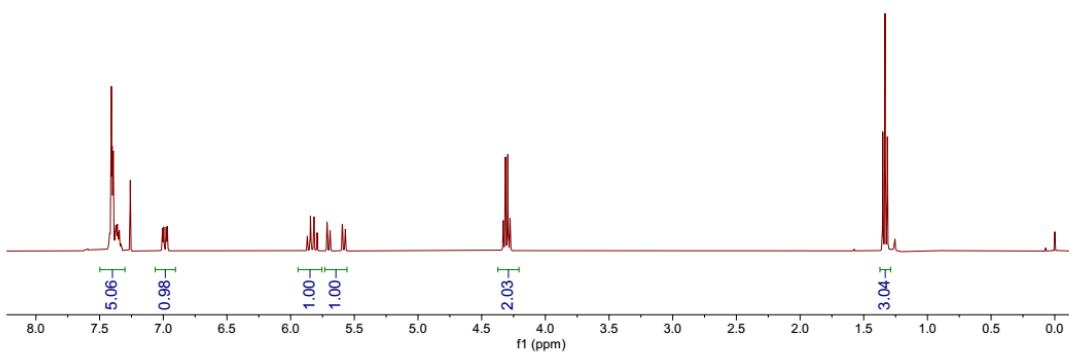

$^{19}\text{F}$  NMR (376 MHz,  $\text{Chloroform-}d$ ) spectrum of compound **3**

YCH-9-19A1.2.fid

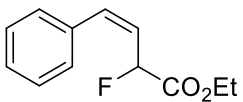

-174.65

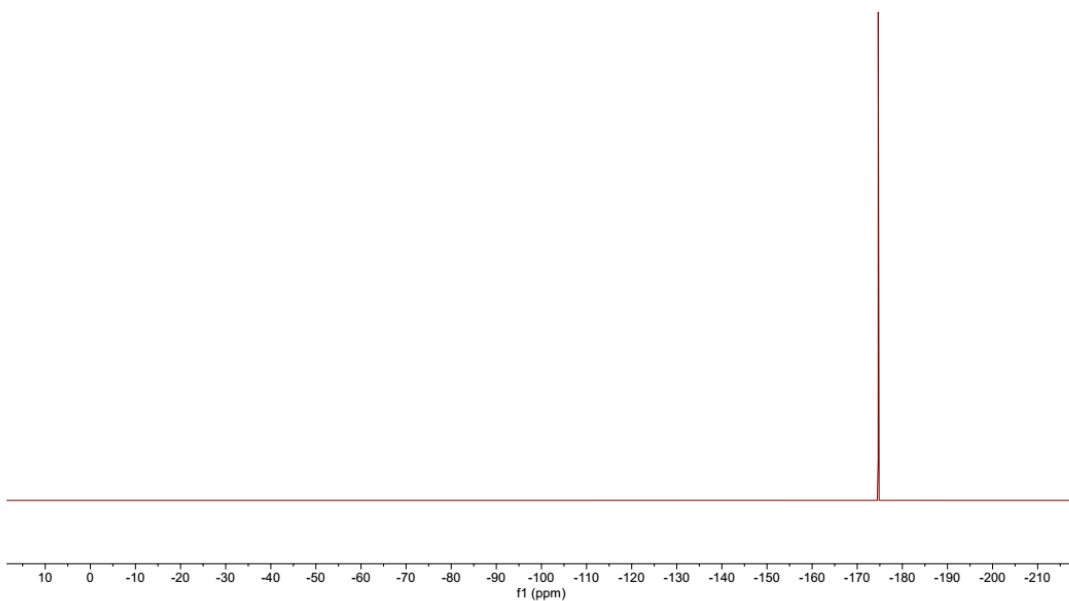

$^{13}\text{C}$  NMR (101 MHz, Chloroform-*d*) spectrum of compound **3**

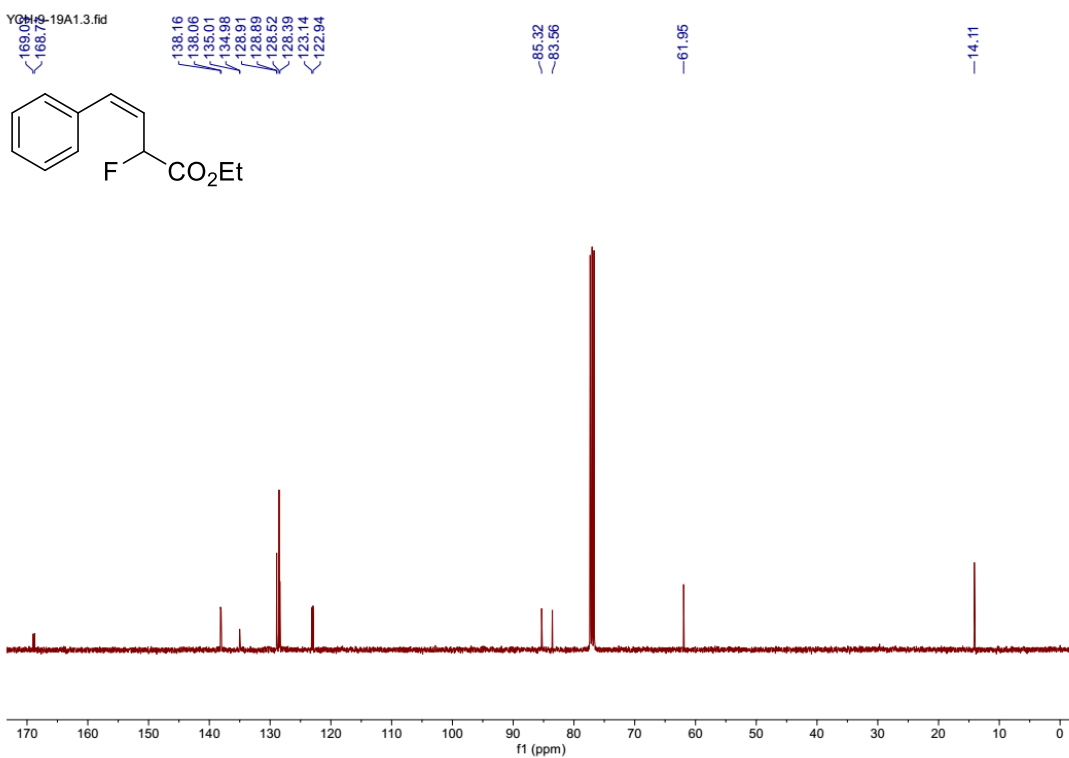

$^1\text{H}$  NMR (400 MHz,  $\text{CDCl}_3$ ) spectrum of compound **4**

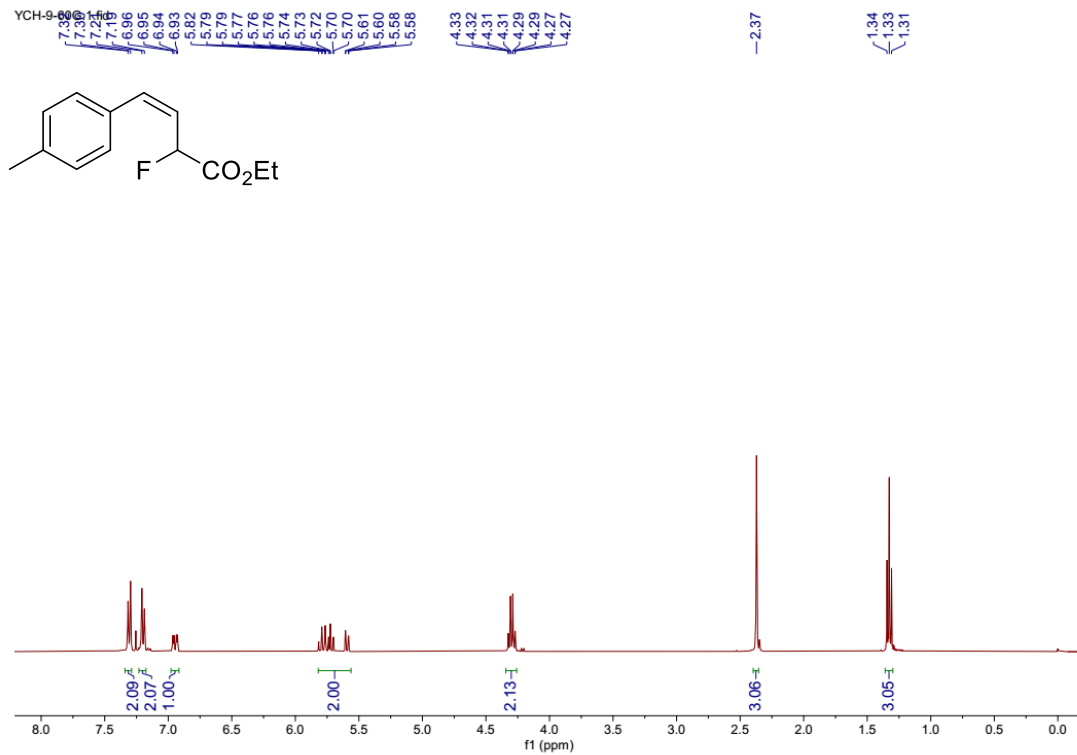

<sup>19</sup>F NMR (376 MHz, Chloroform-*d*) spectrum of compound 4

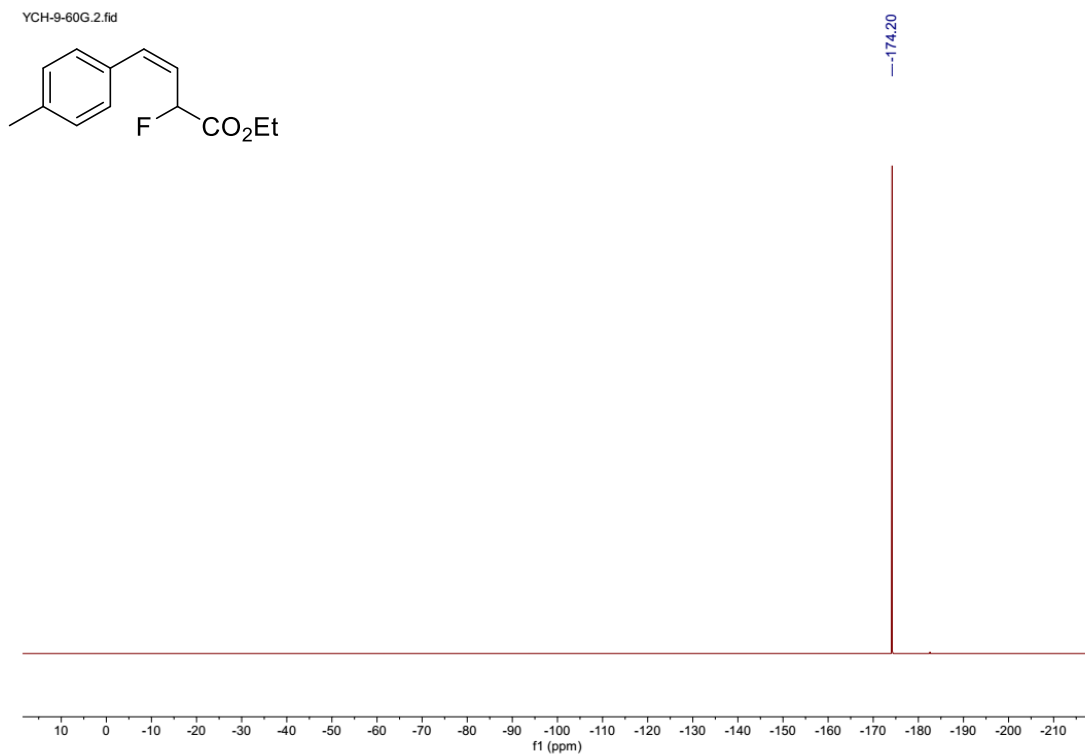

$^{13}\text{C}$  NMR (101 MHz, Chloroform-*d*) spectrum of compound **4**

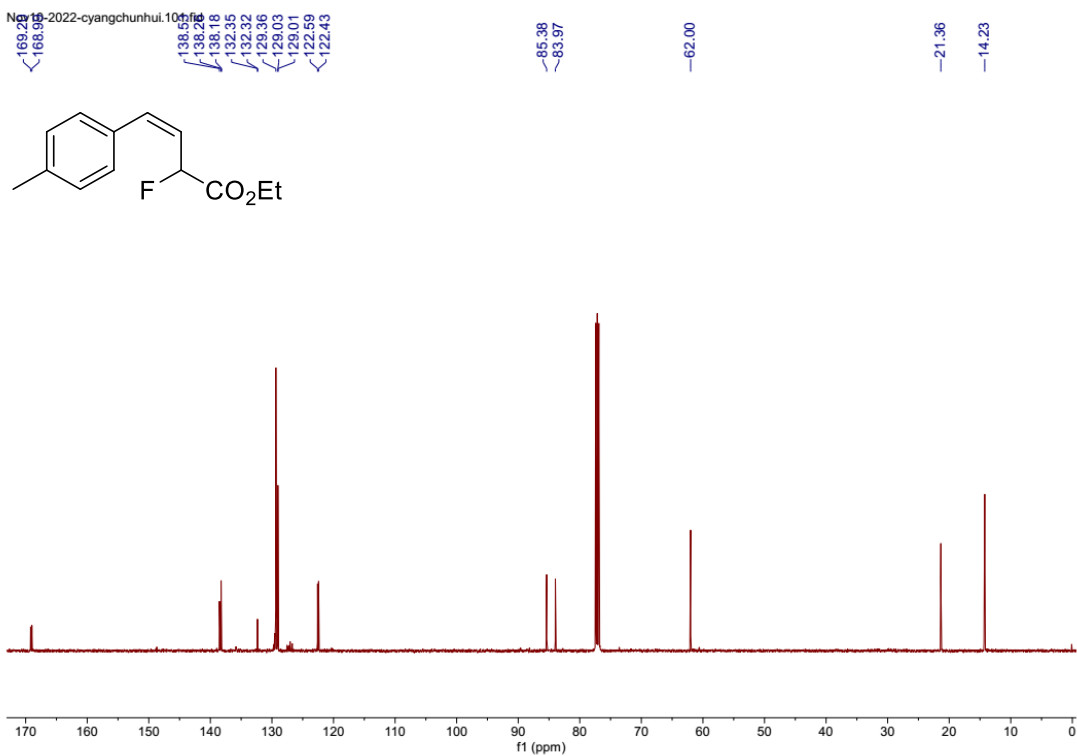

$^1\text{H}$  NMR (400 MHz,  $\text{CDCl}_3$ ) spectrum of compound **5**

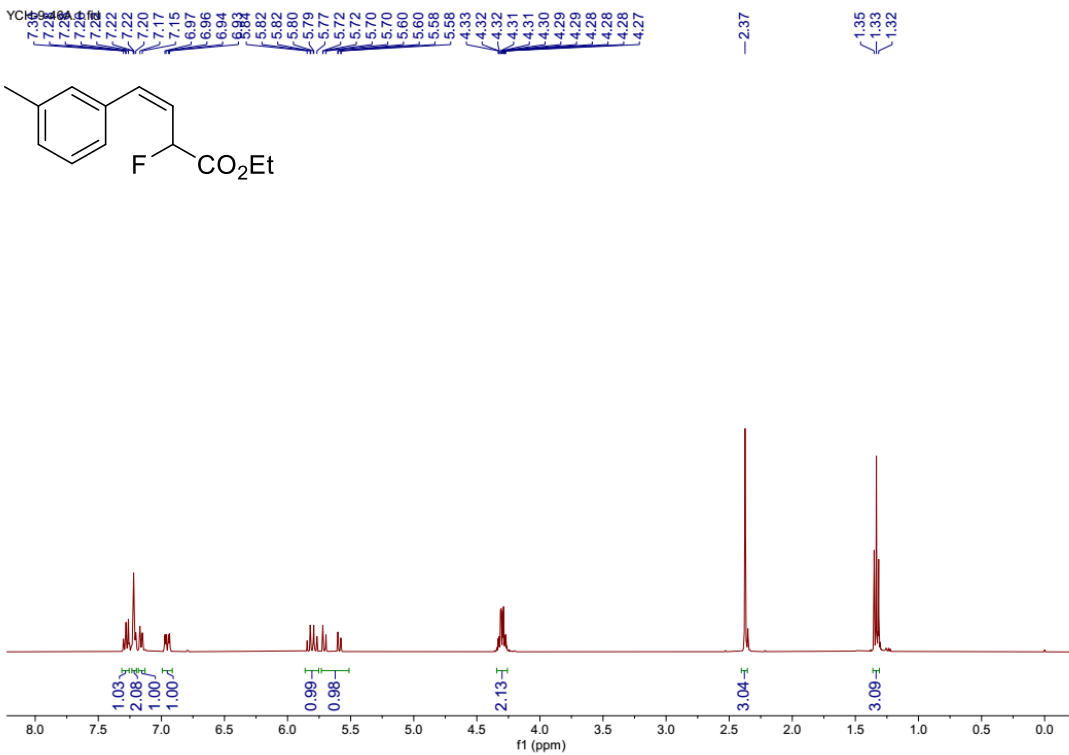

<sup>19</sup>F NMR (376 MHz, Chloroform-*d*) spectrum of compound 5

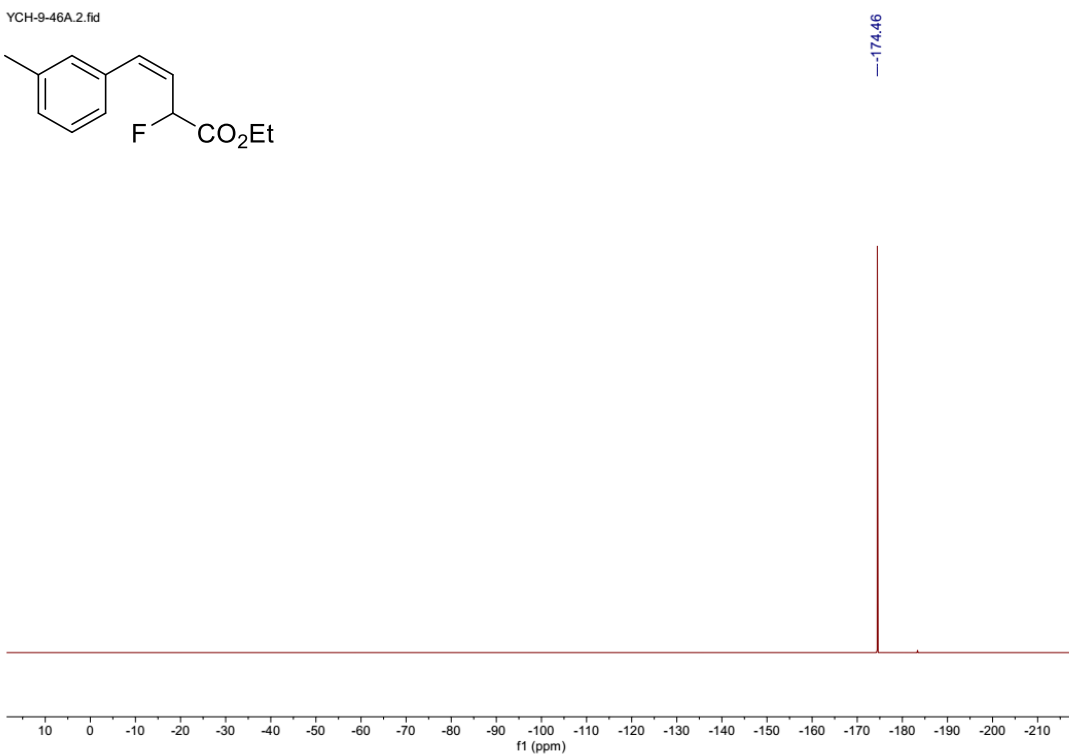

$^{13}\text{C}$  NMR (101 MHz, Chloroform-*d*) spectrum of compound **5**

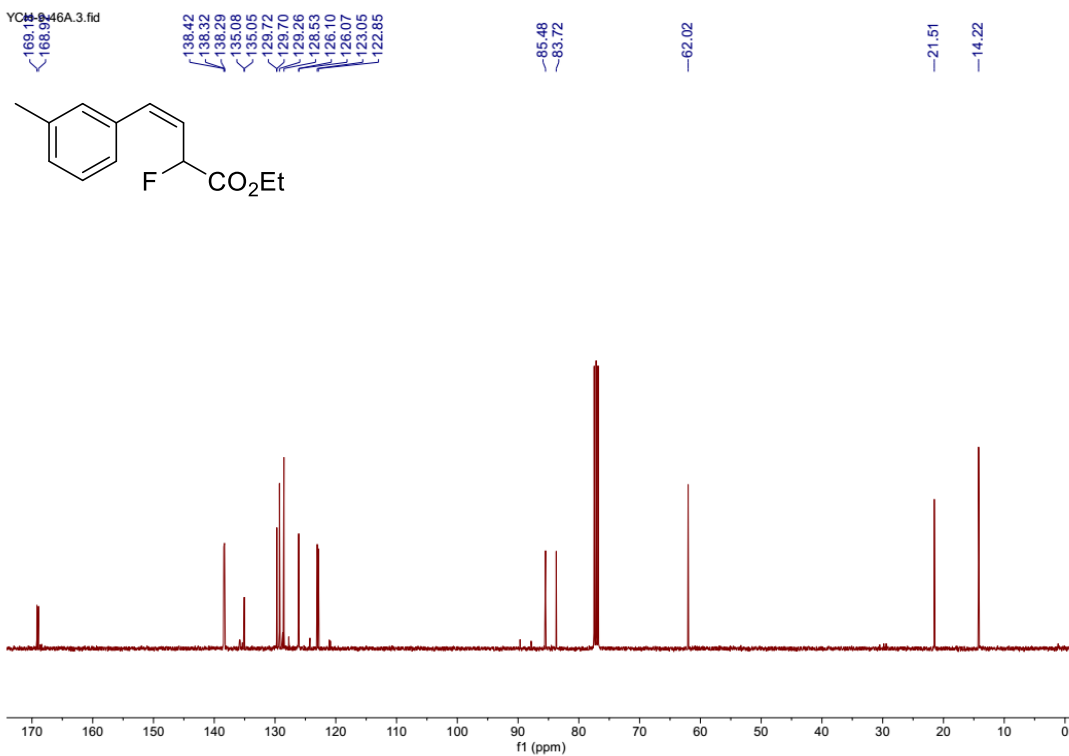

$^1\text{H}$  NMR (400 MHz,  $\text{CDCl}_3$ ) spectrum of compound **6**

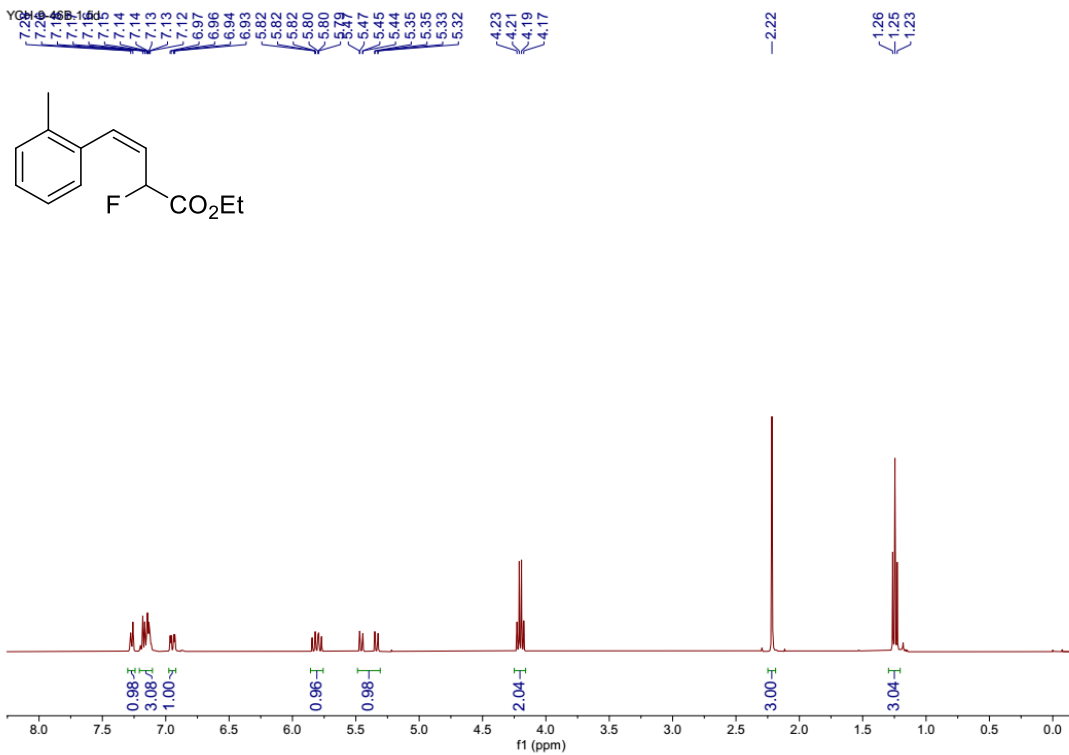

<sup>19</sup>F NMR (376 MHz, Chloroform-*d*) spectrum of compound **6**

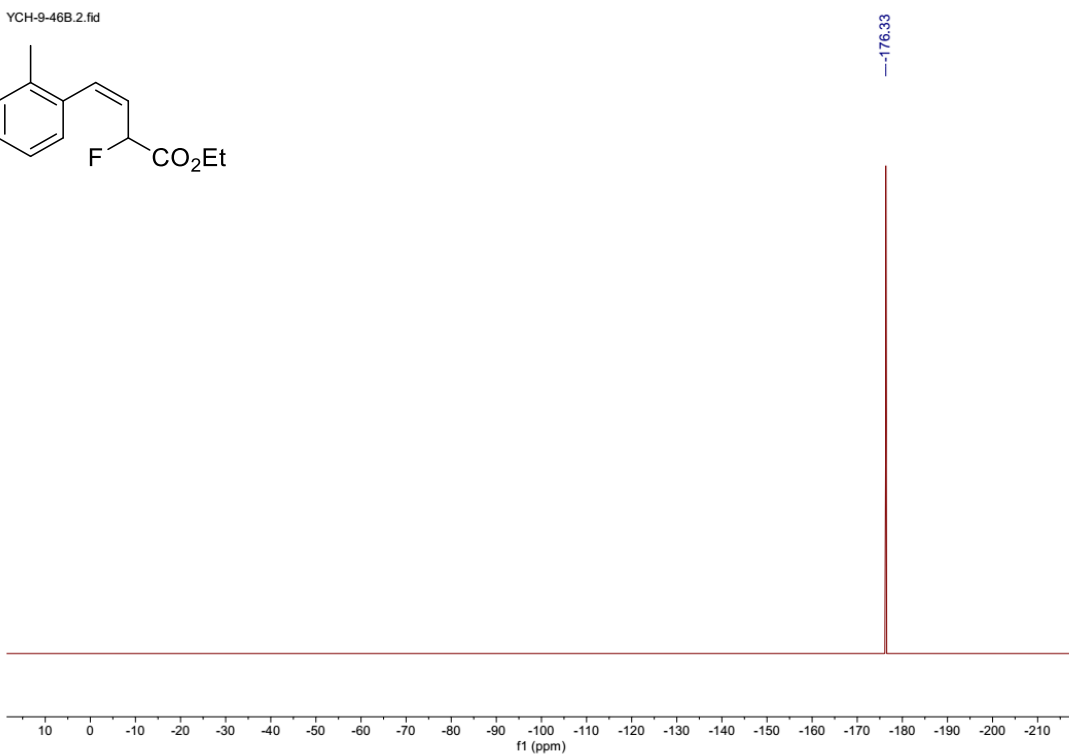



$^{13}\text{C}$  NMR (101 MHz, Chloroform-*d*) spectrum of compound **6**

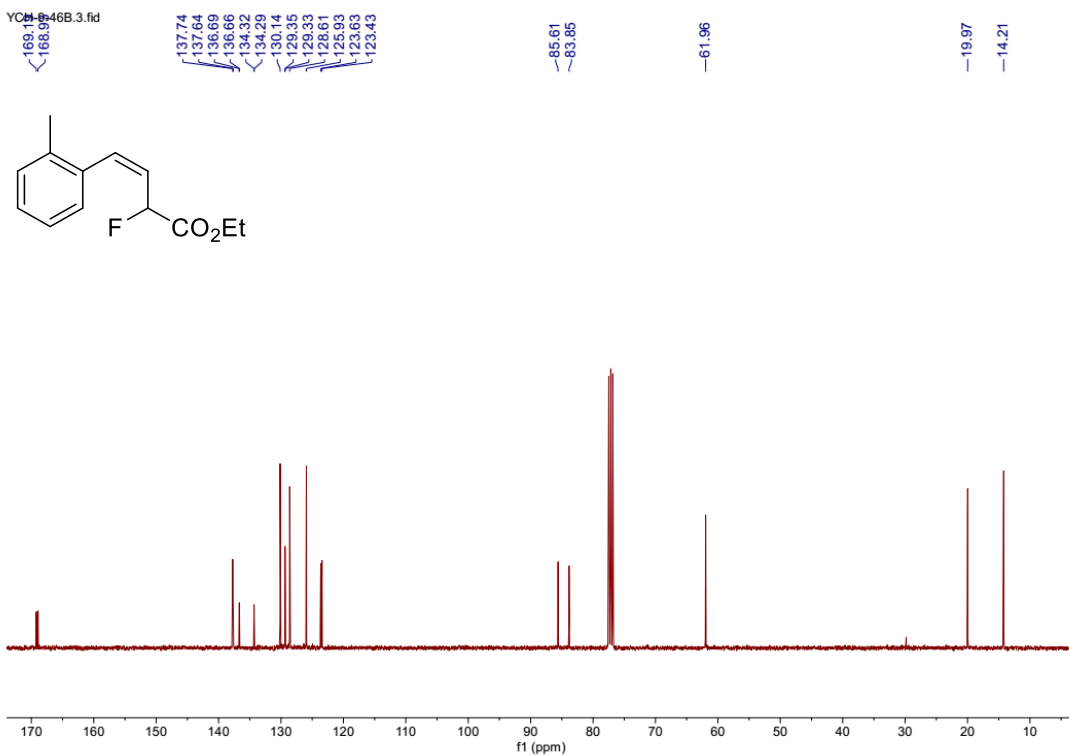

$^1\text{H}$  NMR (400 MHz,  $\text{CDCl}_3$ ) spectrum of compound **7**

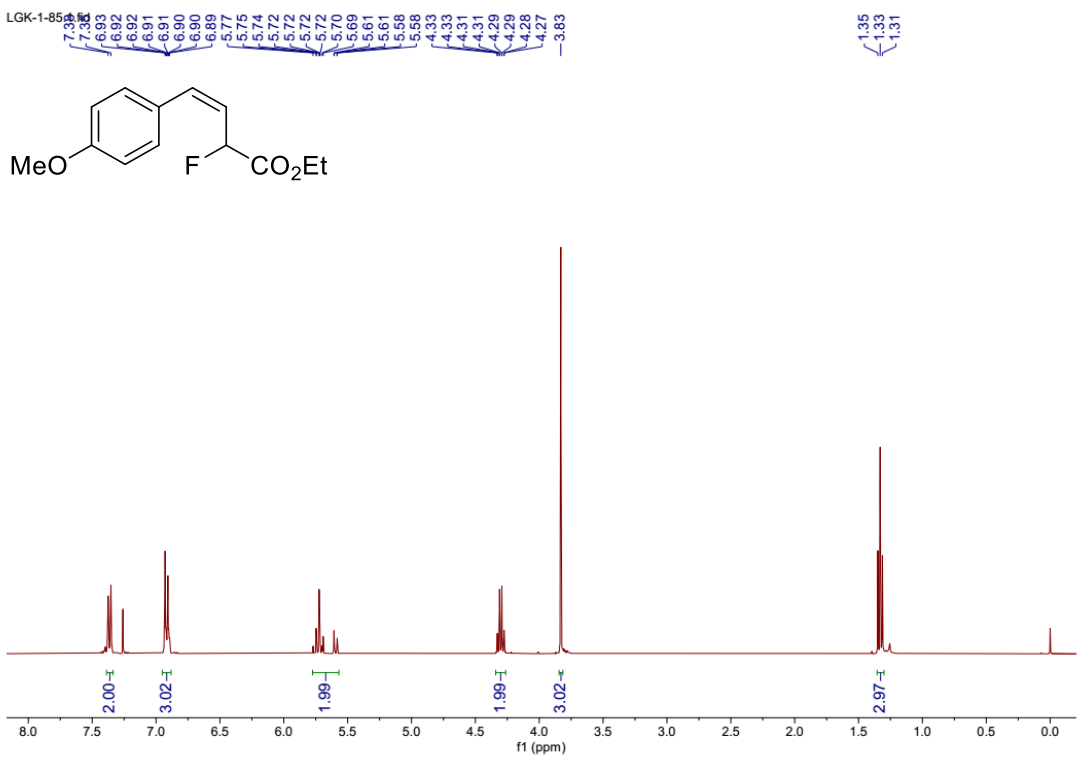

<sup>19</sup>F NMR (376 MHz, Chloroform-*d*) spectrum of compound 7

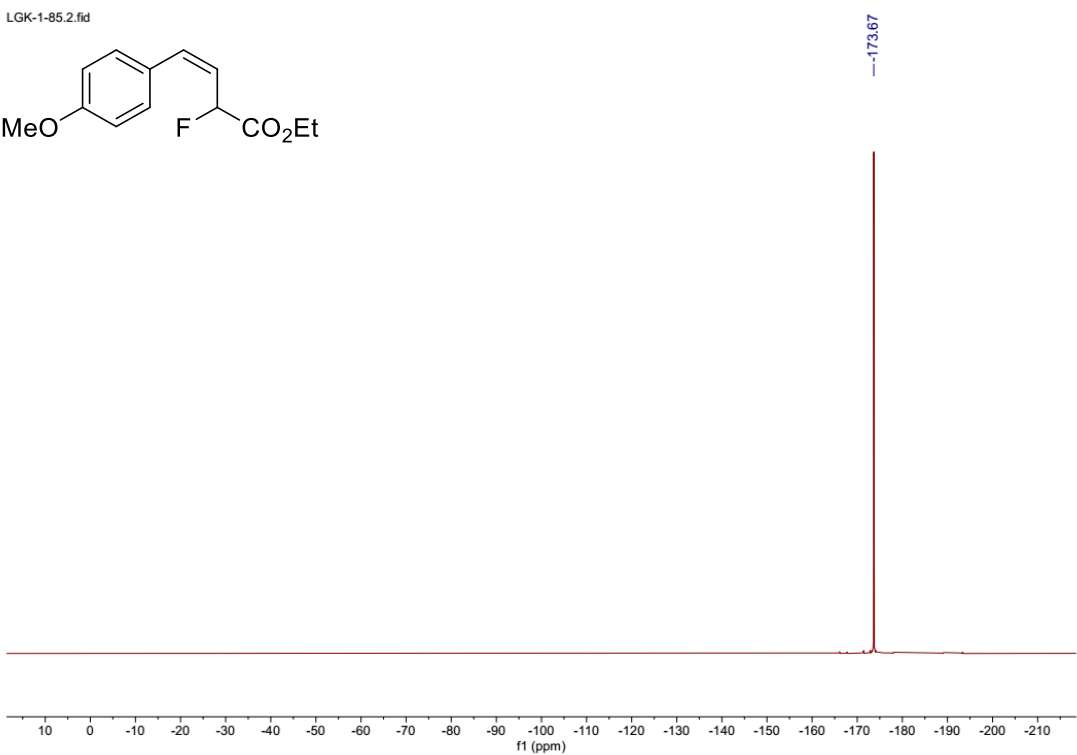

$^{13}\text{C}$  NMR (101 MHz, Chloroform-*d*) spectrum of compound **7**

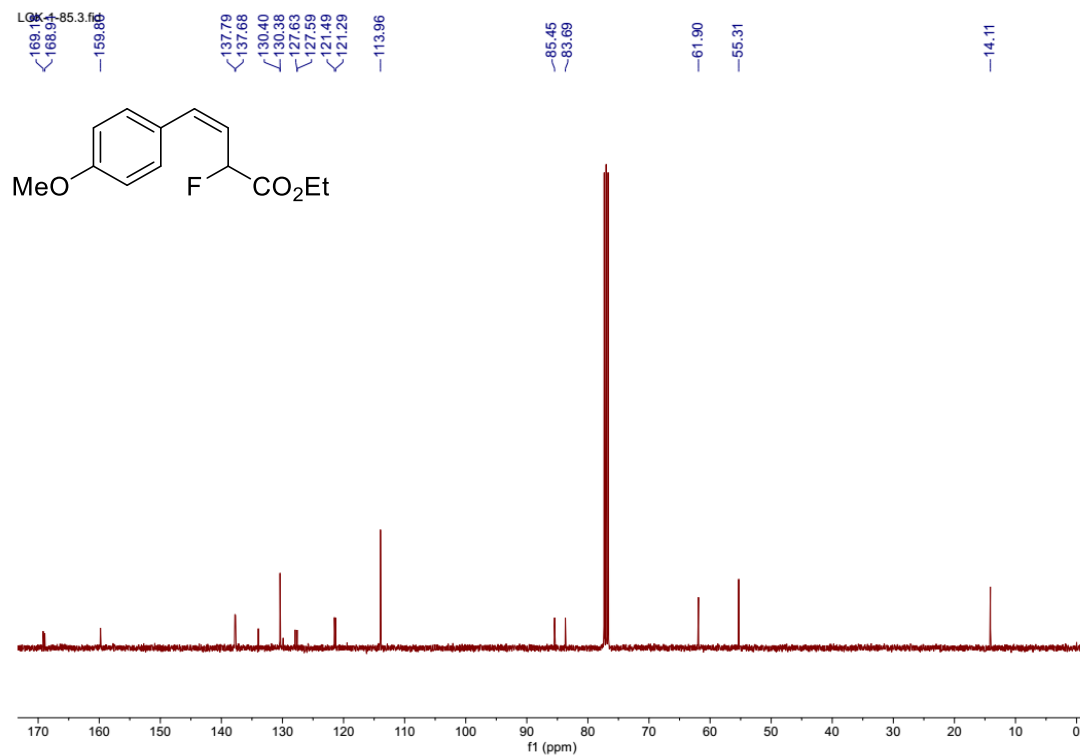

$^1\text{H}$  NMR (400 MHz,  $\text{CDCl}_3$ ) spectrum of compound **8**

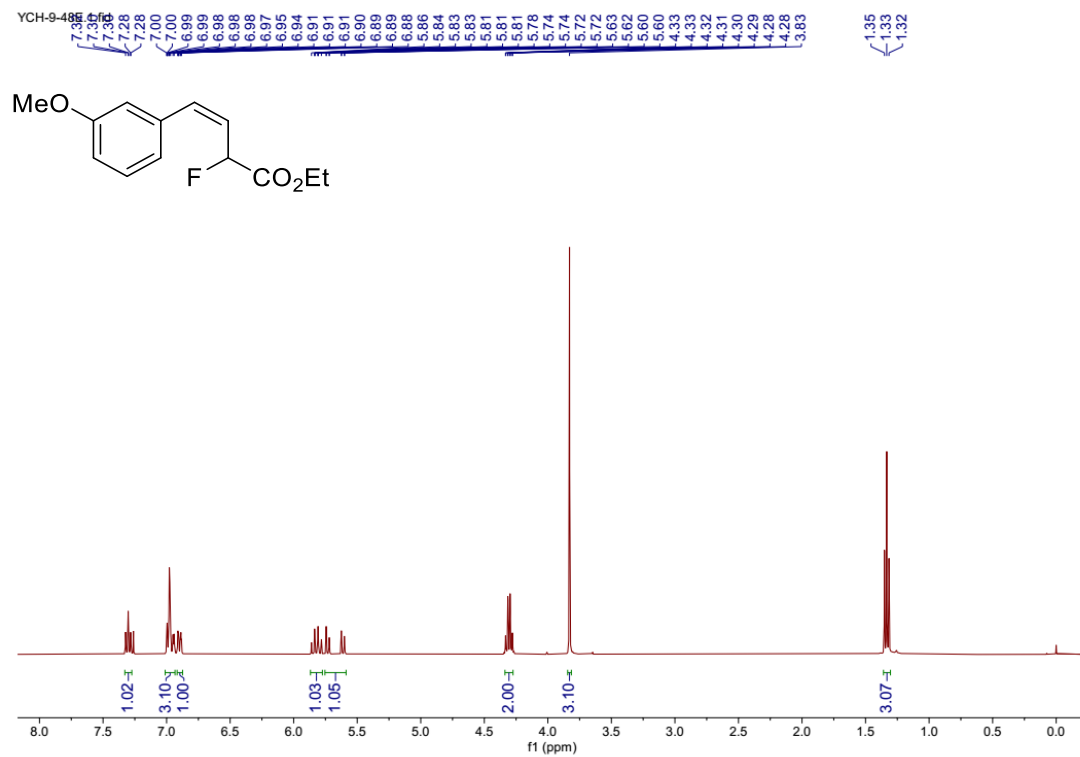

<sup>19</sup>F NMR (376 MHz, Chloroform-*d*) spectrum of compound **8**

YCH-9-48E.2.fid

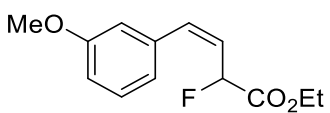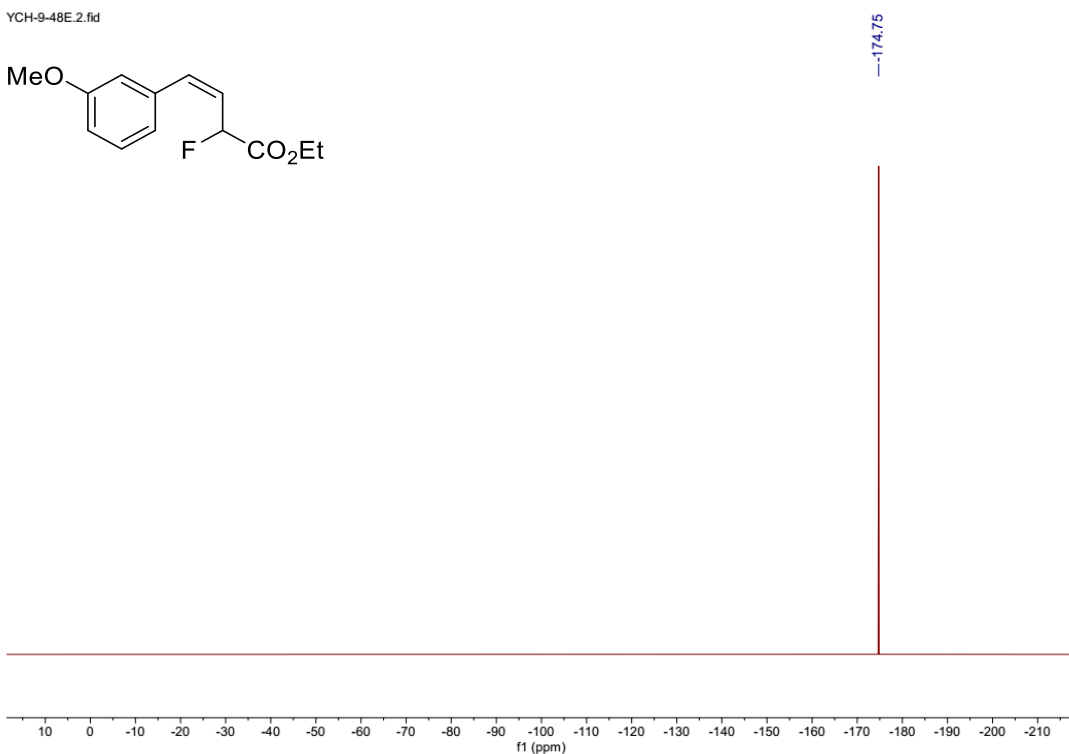

<sup>13</sup>C NMR (101 MHz, Chloroform-*d*) spectrum of compound **8**

YCH-9-48E.3.fid

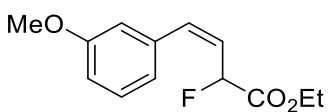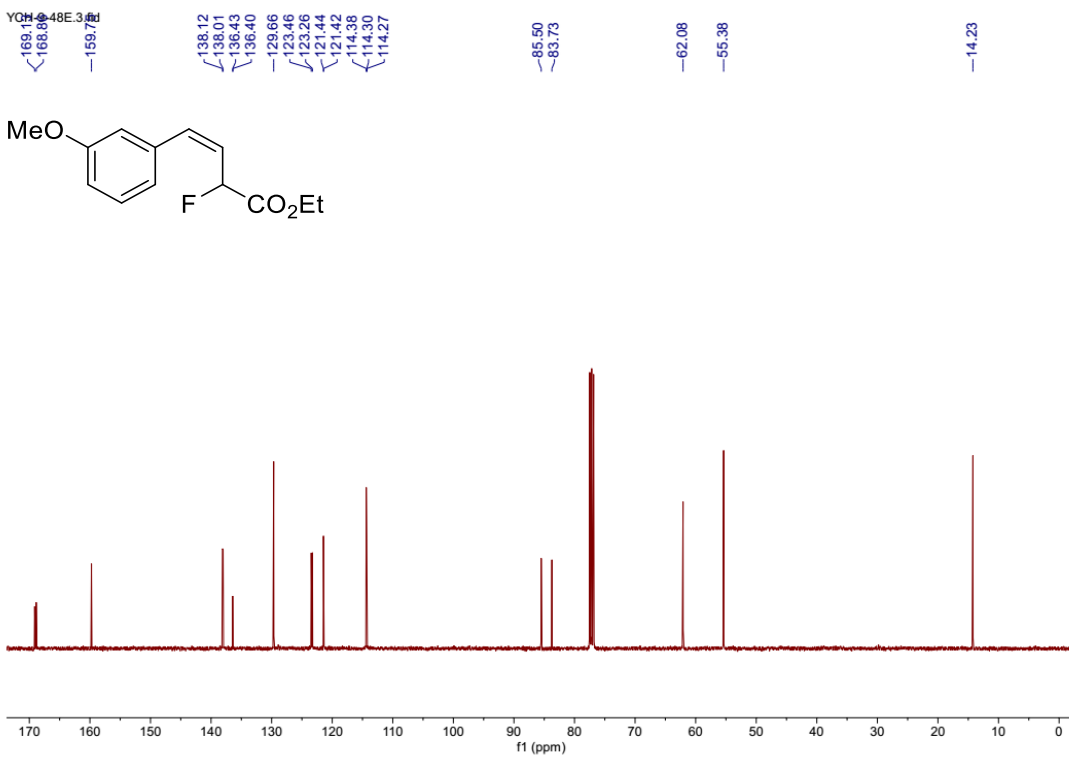

<sup>1</sup>H NMR (400 MHz, CDCl<sub>3</sub>) spectrum of compound **9**

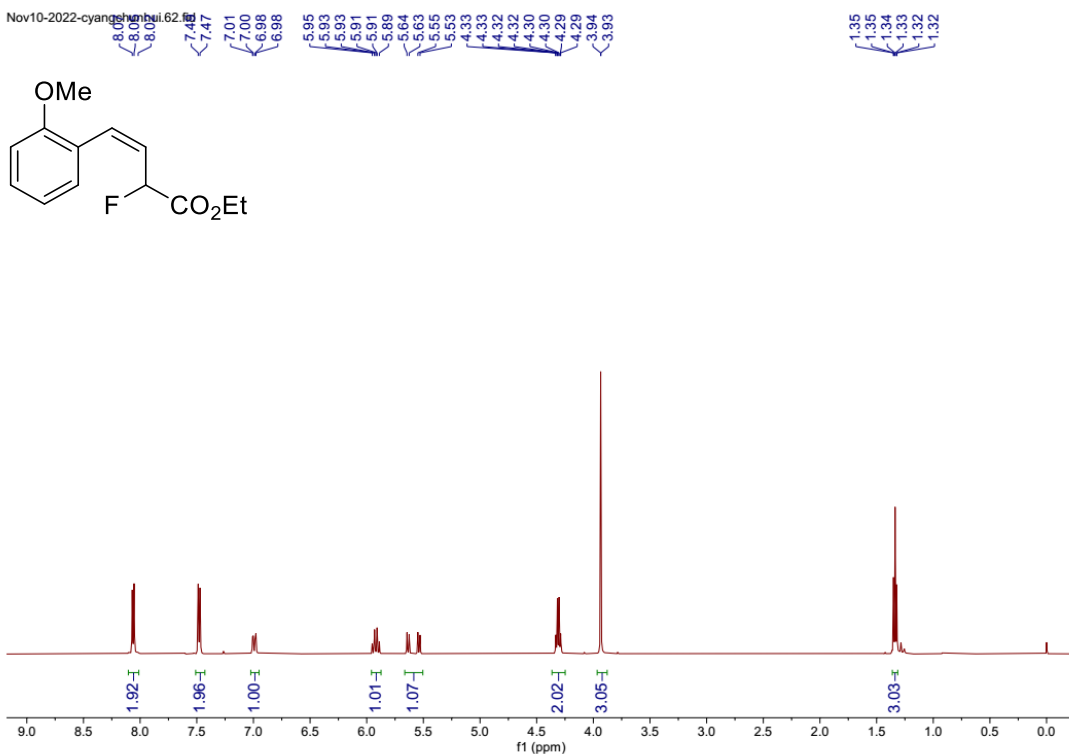

<sup>19</sup>F NMR (376 MHz, Chloroform-*d*) spectrum of compound **9**

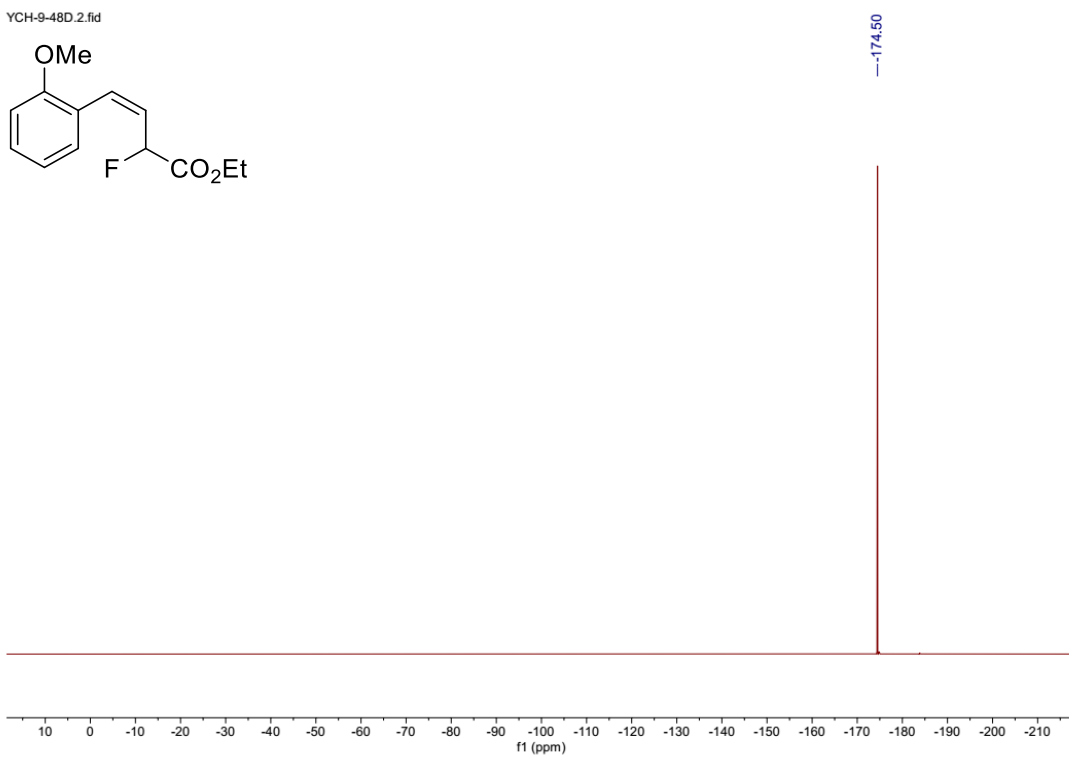

$^{13}\text{C}$  NMR (101 MHz, Chloroform-*d*) spectrum of compound **9**

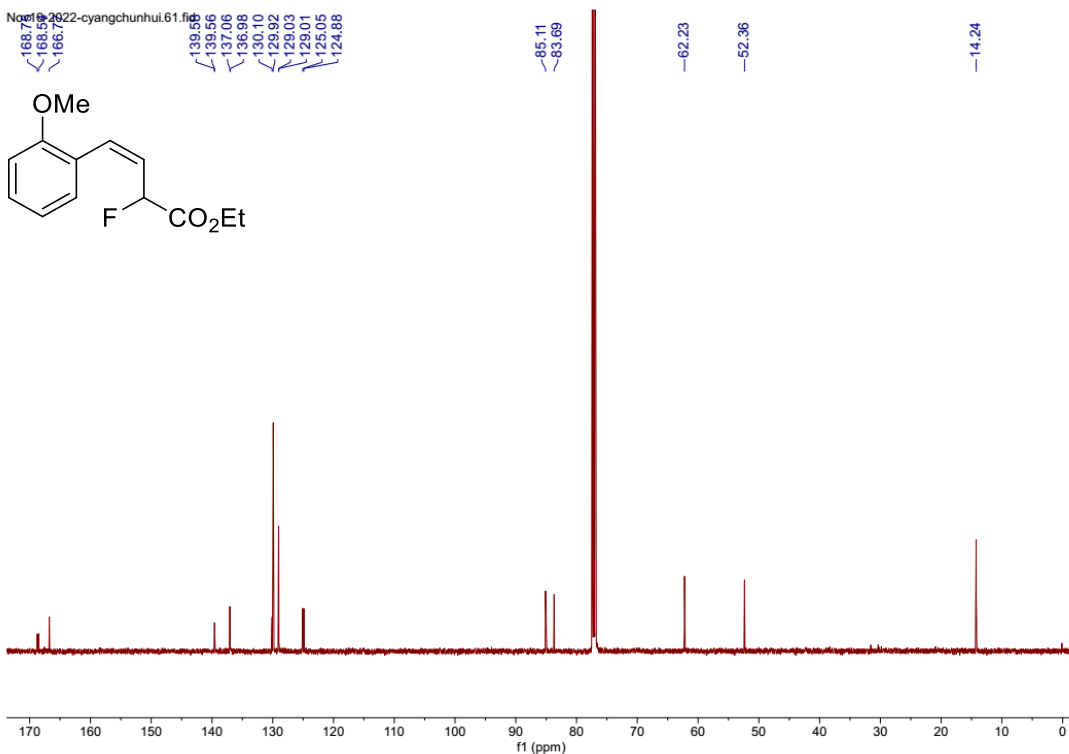

$^1\text{H}$  NMR (400 MHz,  $\text{CDCl}_3$ ) spectrum of compound **10**

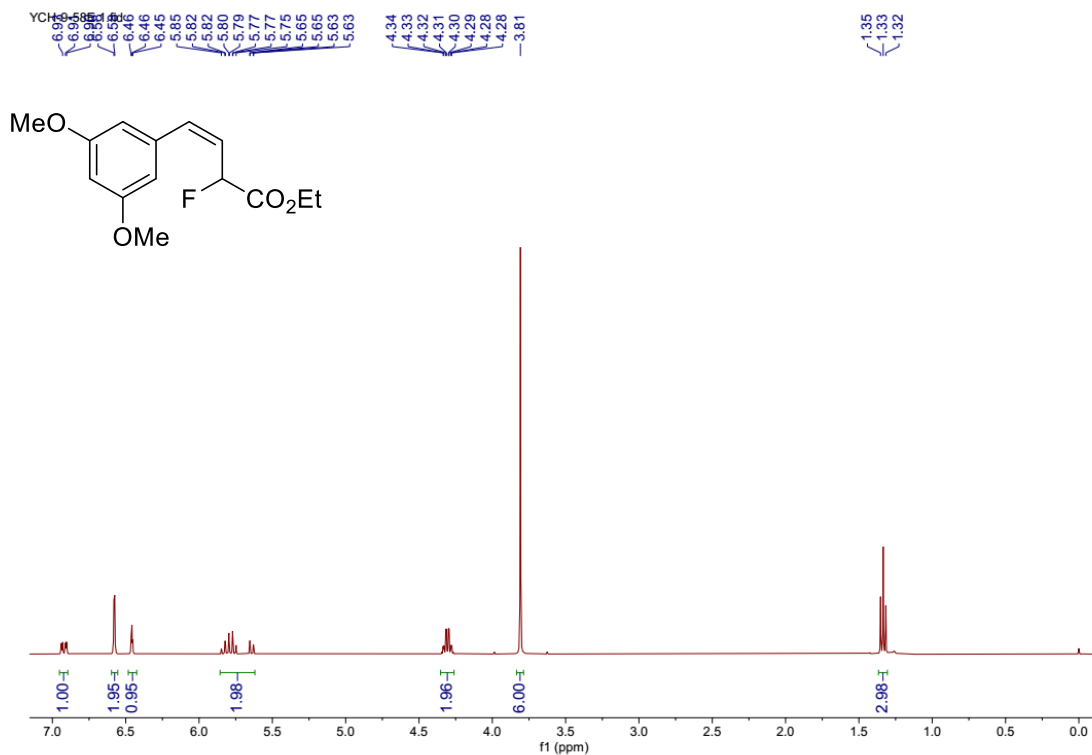

<sup>19</sup>F NMR (376 MHz, Chloroform-*d*) spectrum of compound **10**

YCH-9-58E.2.fid

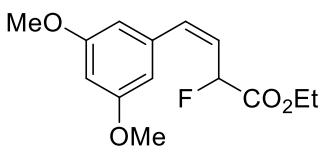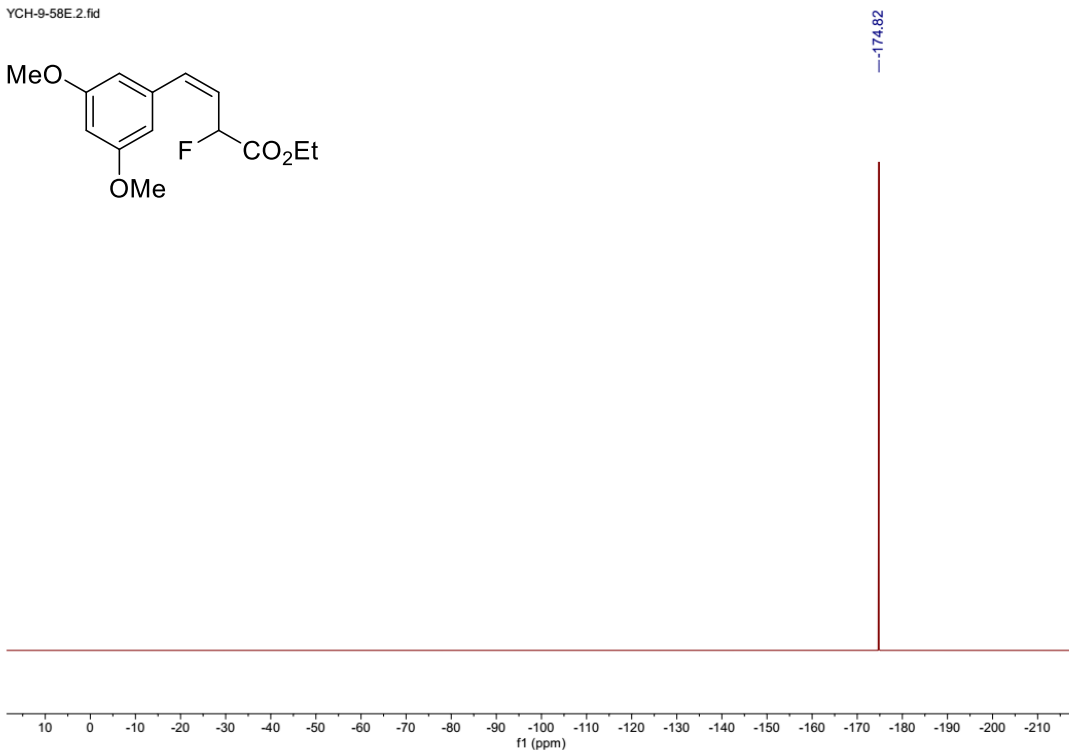

<sup>13</sup>C NMR (101 MHz, Chloroform-*d*) spectrum of compound **10**

YCH-9-58E.3.fid

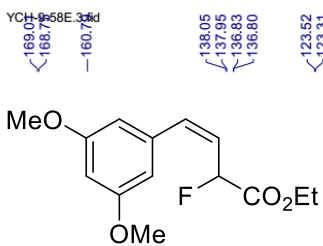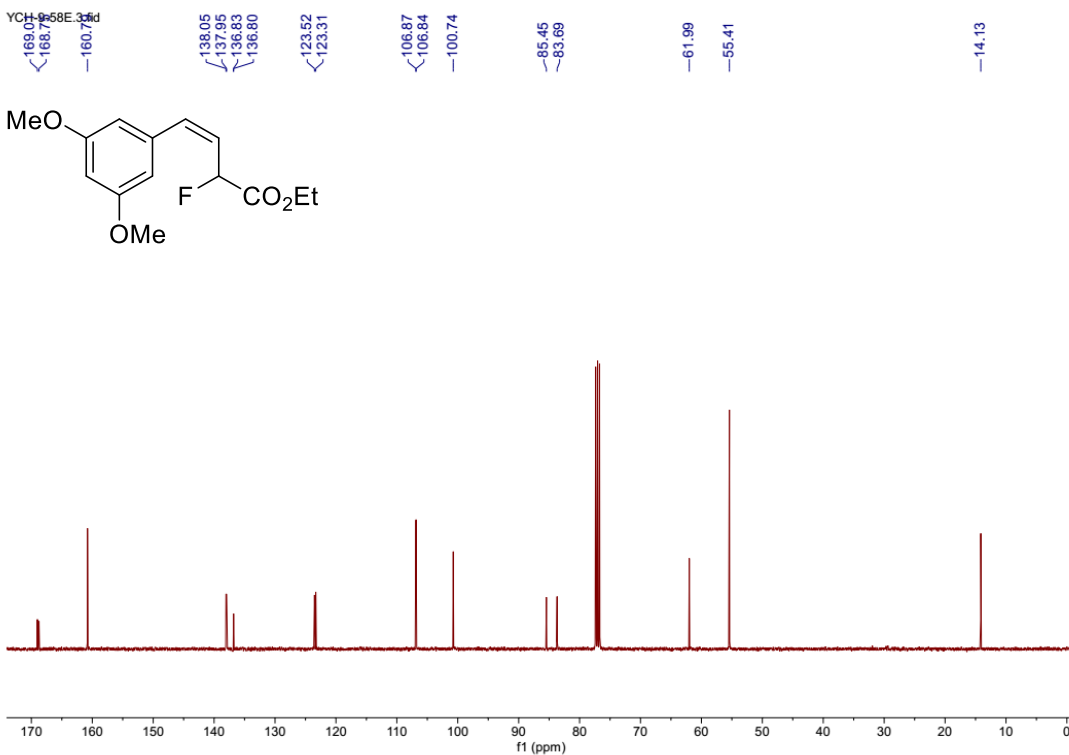

<sup>1</sup>H NMR (400 MHz, CDCl<sub>3</sub>) spectrum of compound **11**

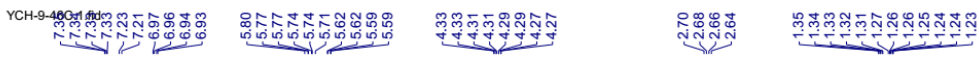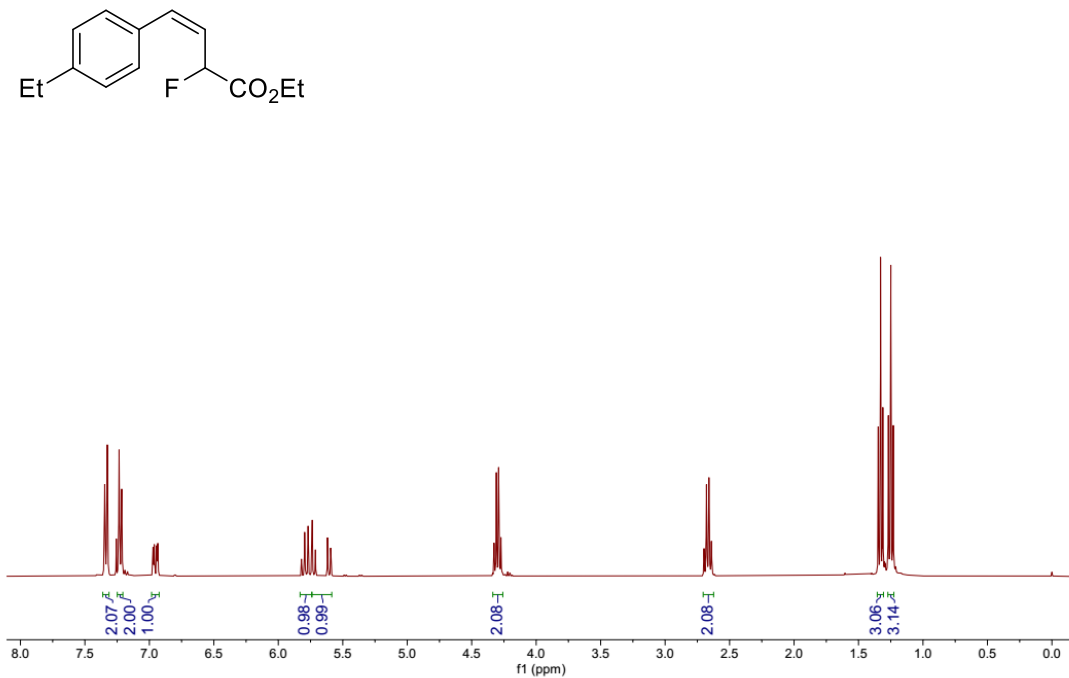

<sup>19</sup>F NMR (376 MHz, Chloroform-*d*) spectrum of compound **11**

YCH-9-46C.2.fid

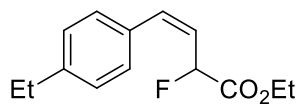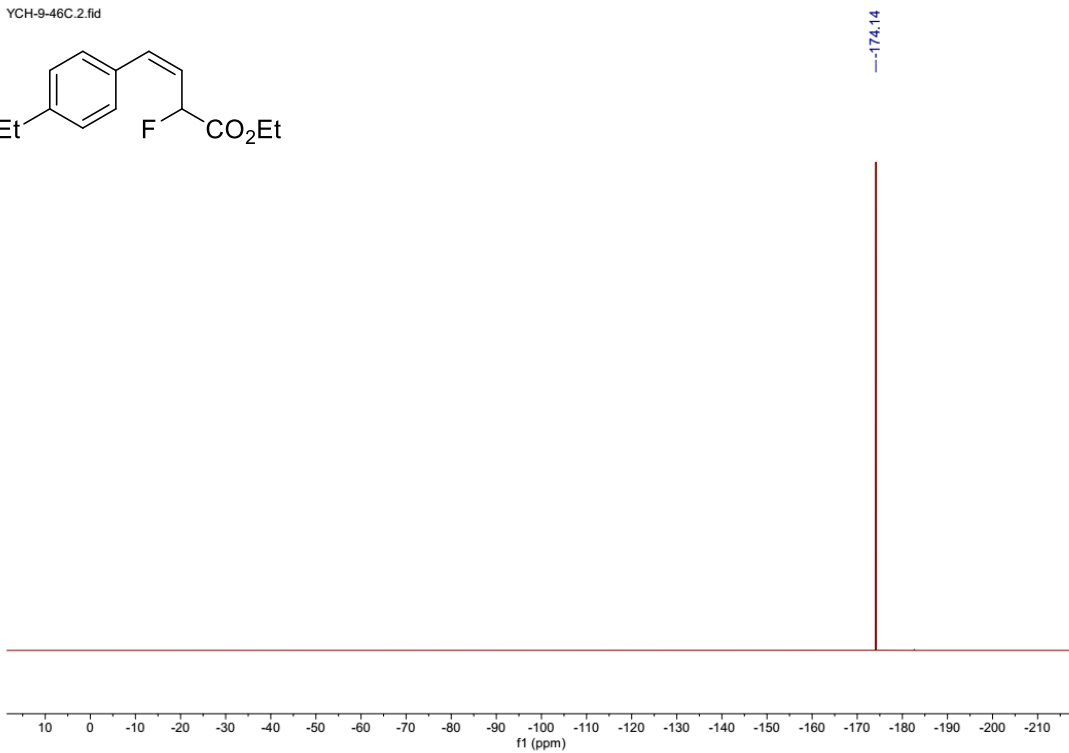



<sup>13</sup>C NMR (101 MHz, Chloroform-*d*) spectrum of compound **11**

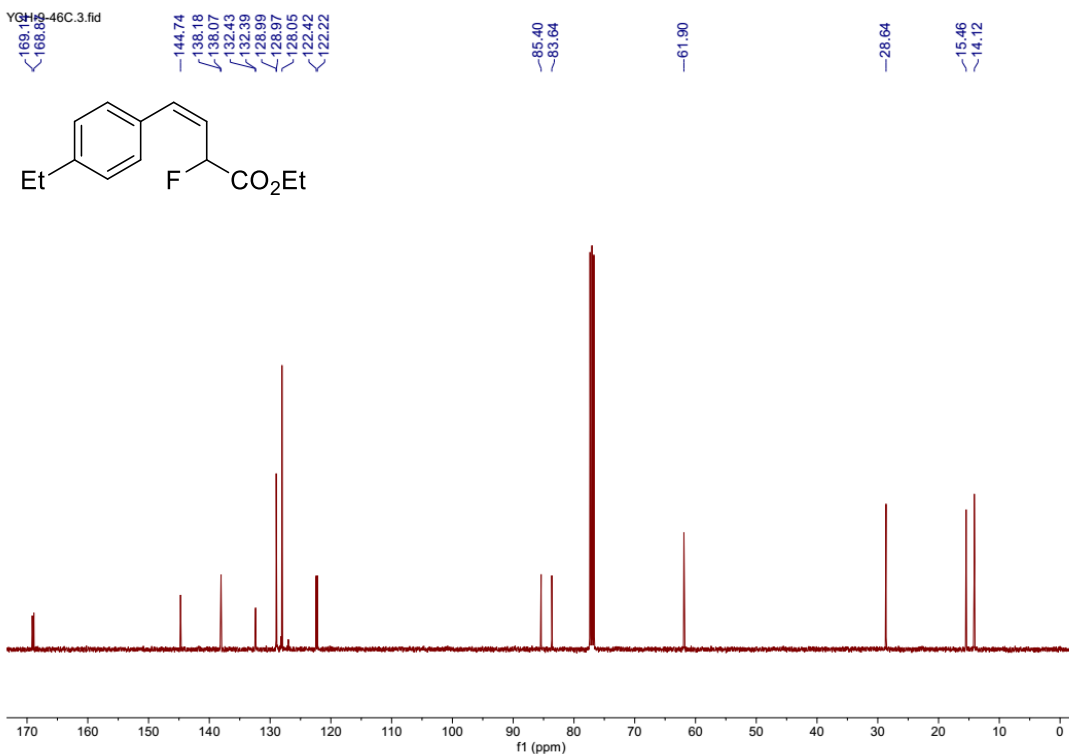

<sup>1</sup>H NMR (400 MHz, CDCl<sub>3</sub>) spectrum of compound **12**

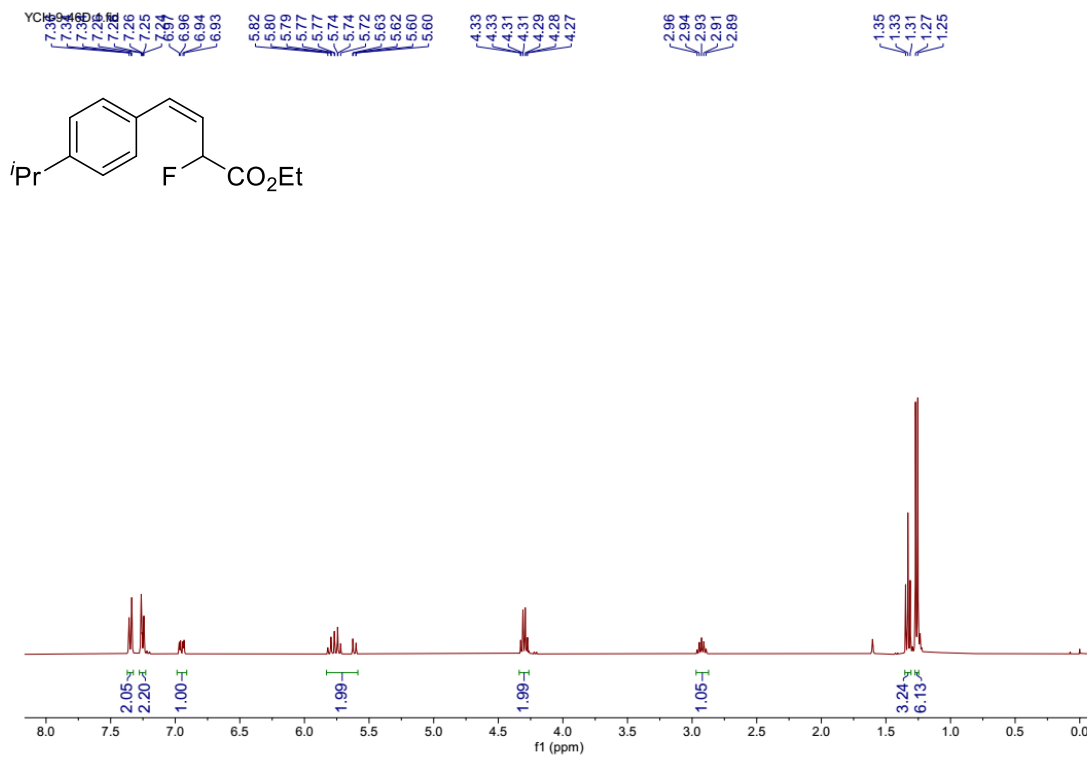

<sup>19</sup>F NMR (376 MHz, Chloroform-*d*) spectrum of compound **12**

YCH-9-46D.2.fid

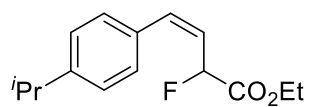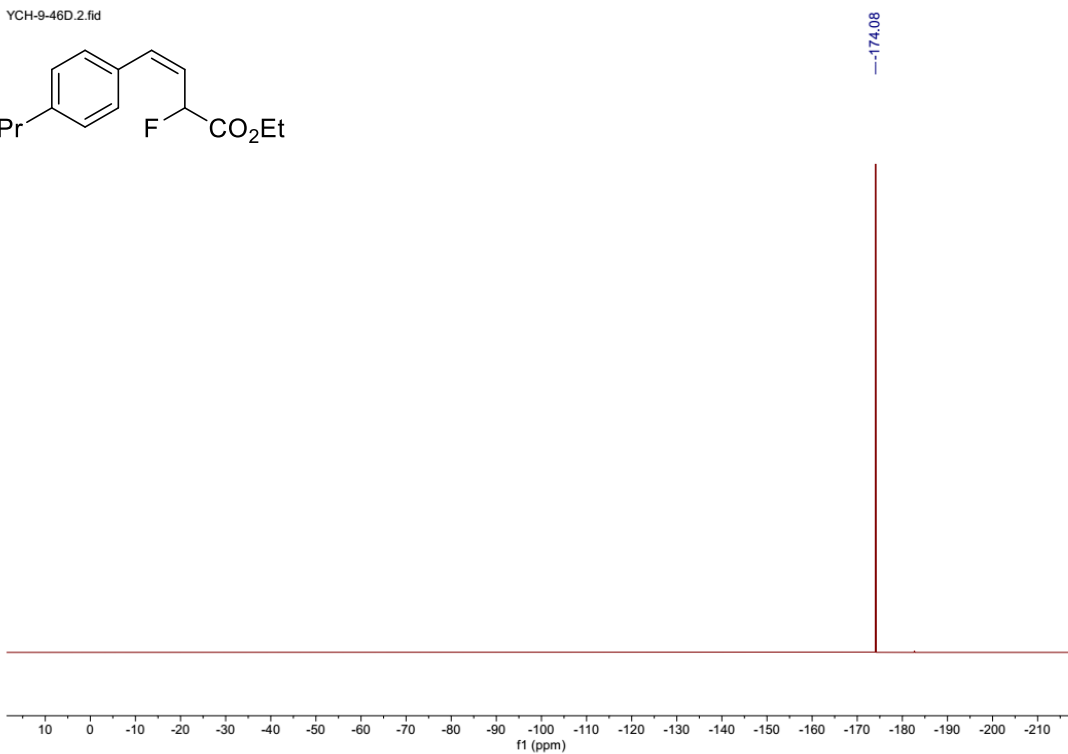

<sup>13</sup>C NMR (101 MHz, Chloroform-*d*) spectrum of compound **12**

YCH-9-46D.3.fid

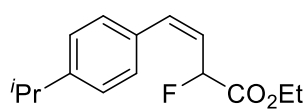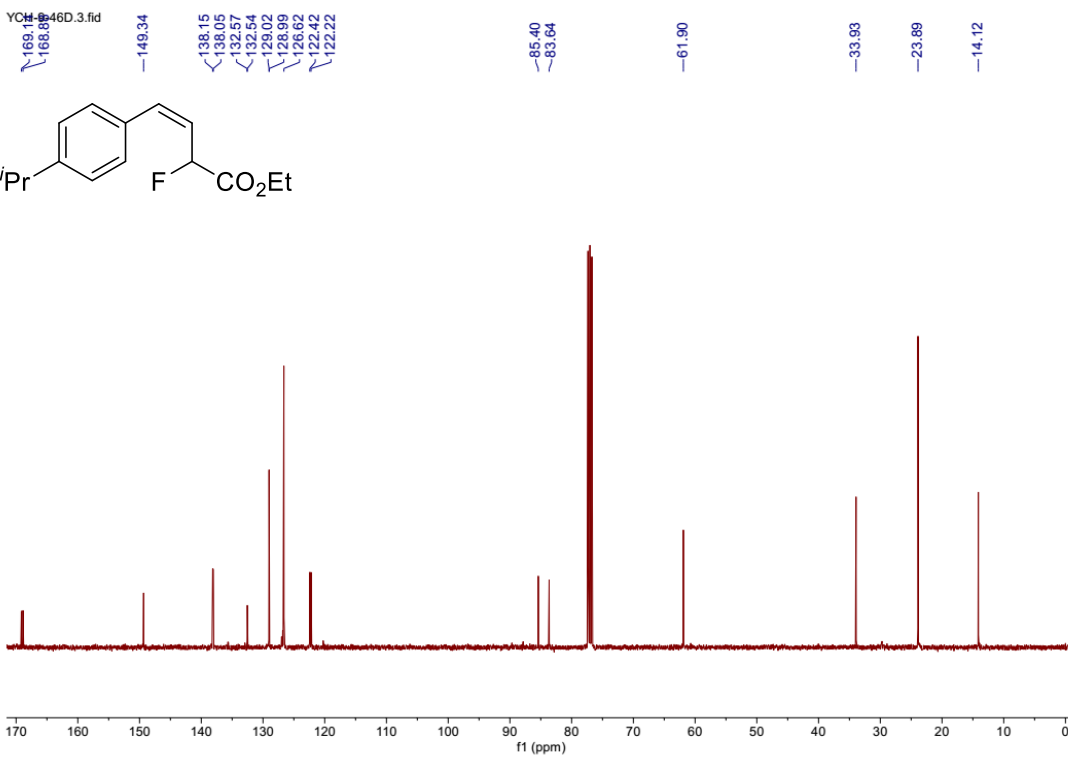

<sup>1</sup>H NMR (400 MHz, CDCl<sub>3</sub>) spectrum of compound **13**

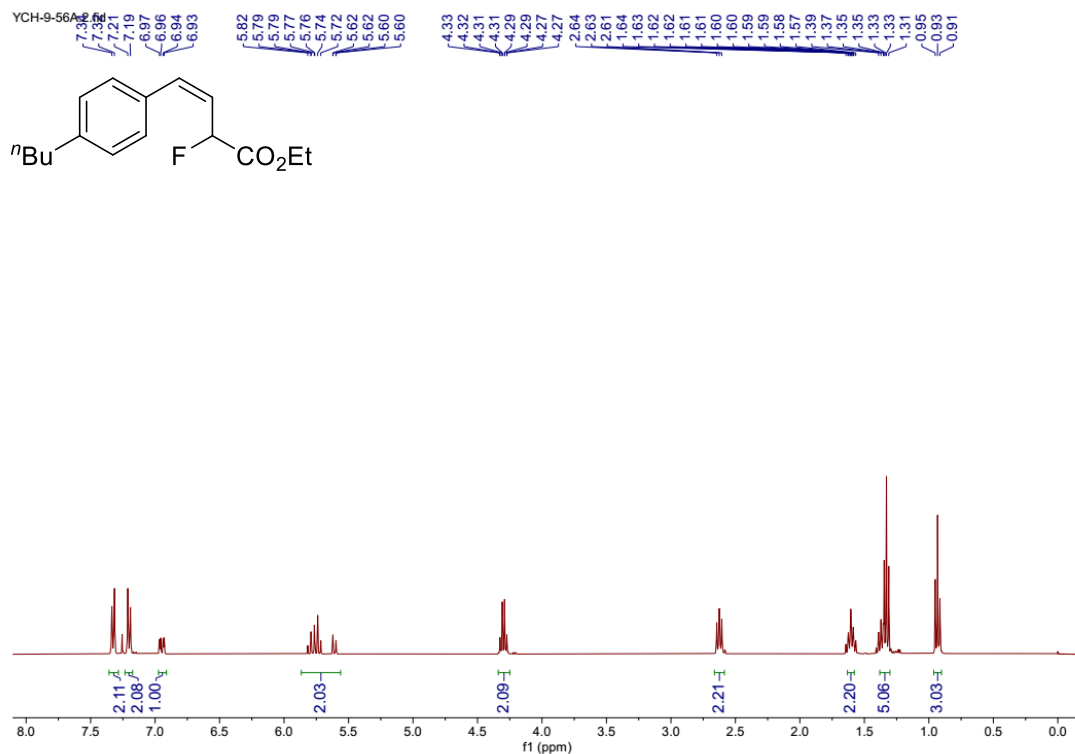

<sup>19</sup>F NMR (376 MHz, Chloroform-*d*) spectrum of compound **13**

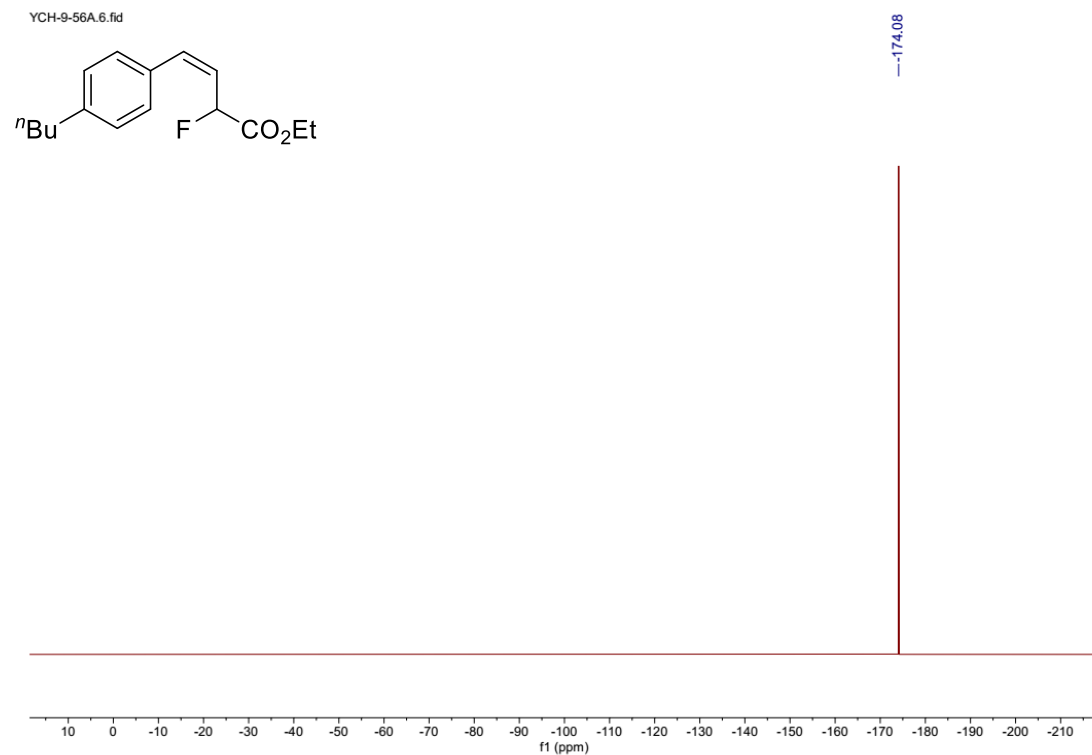

$^{13}\text{C}$  NMR (101 MHz, Chloroform-*d*) spectrum of compound **13**

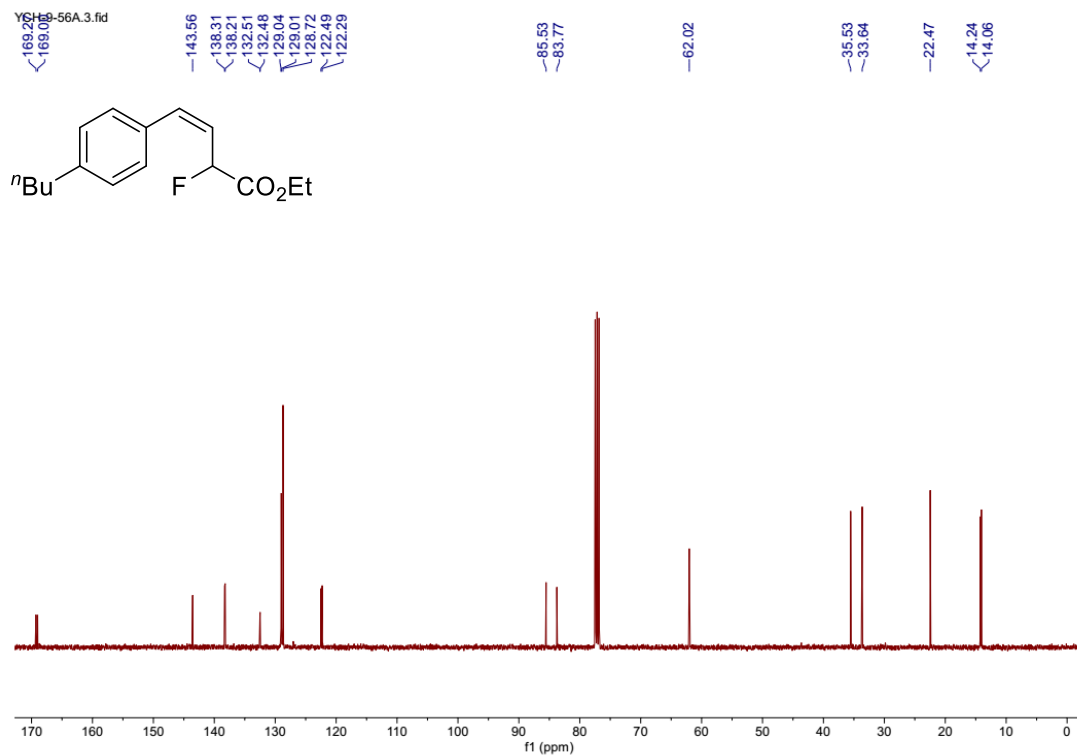

$^1\text{H}$  NMR (400 MHz,  $\text{CDCl}_3$ ) spectrum of compound **14**

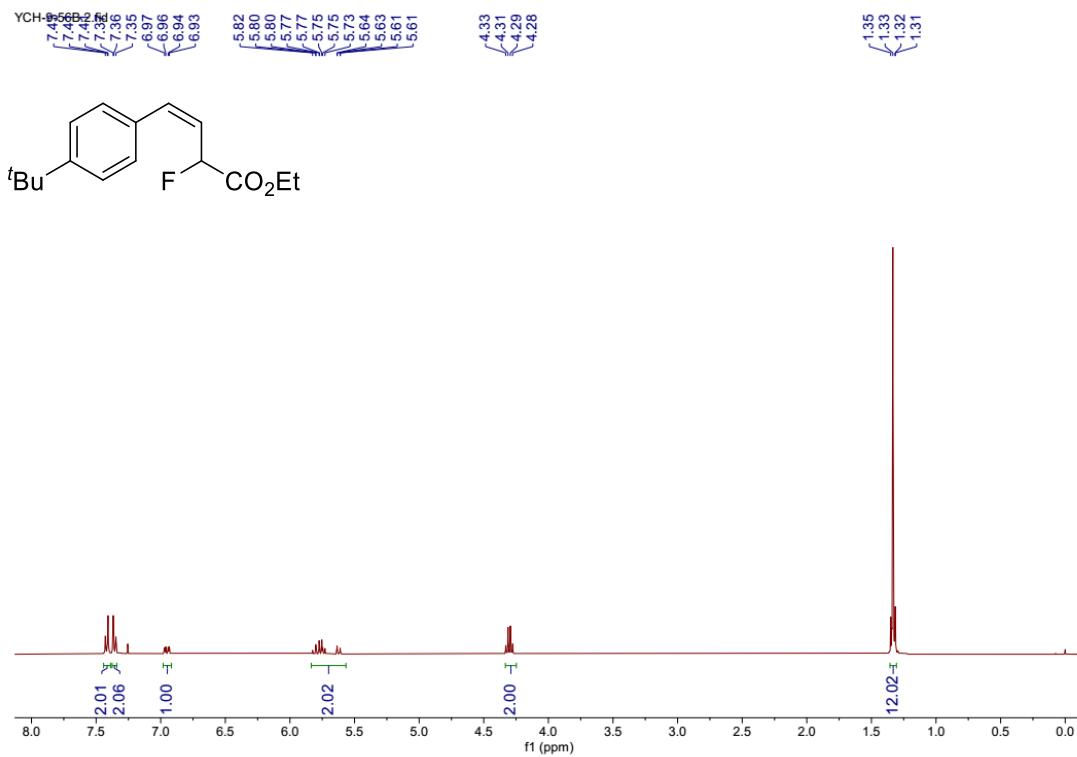

<sup>19</sup>F NMR (376 MHz, Chloroform-*d*) spectrum of compound **14**

YCH-9-56B.6.fid

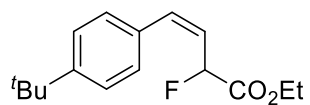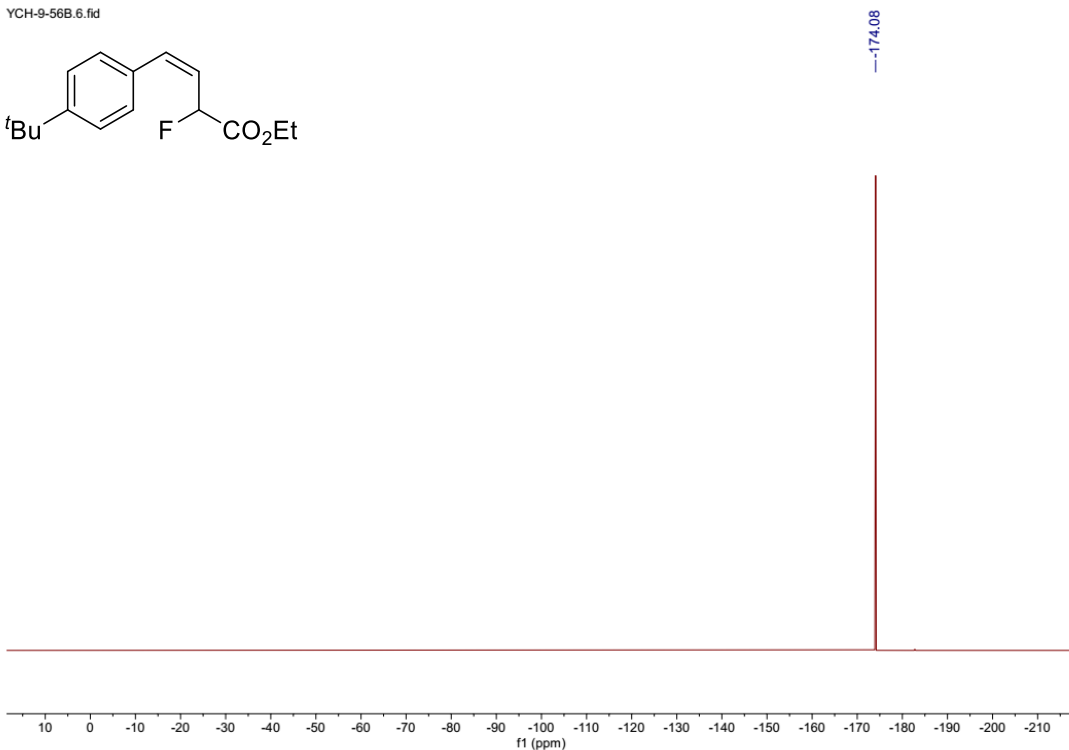

<sup>13</sup>C NMR (101 MHz, Chloroform-*d*) spectrum of compound **14**

YCH-9-56B.3.fid

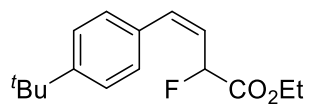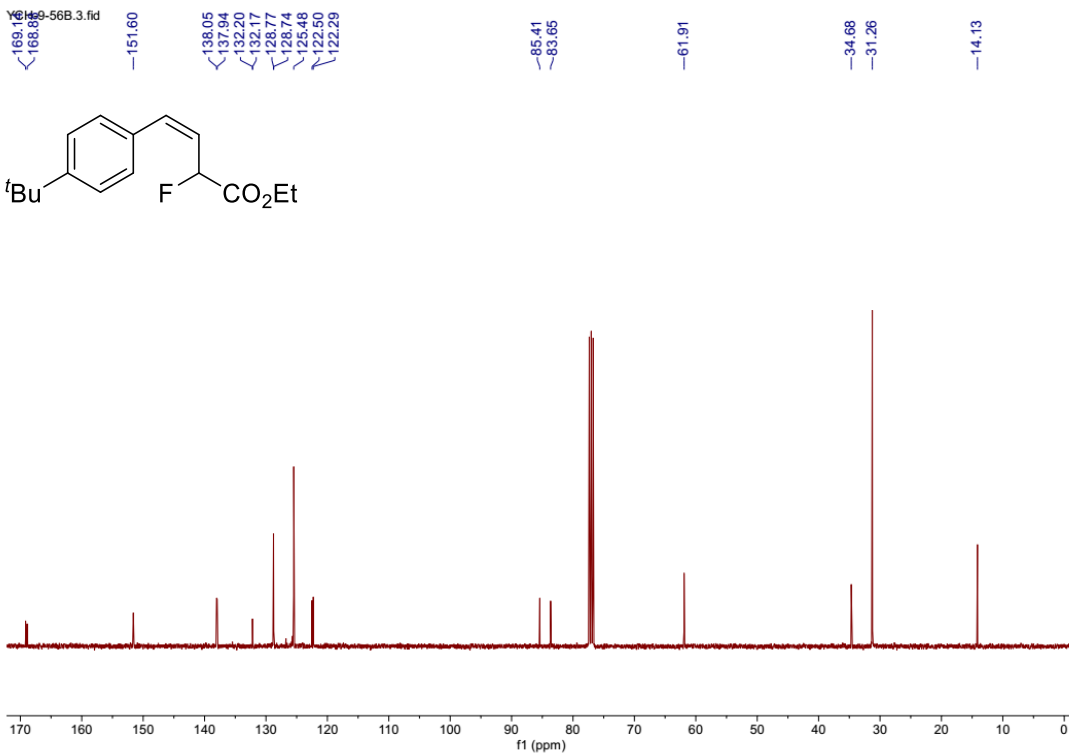

<sup>1</sup>H NMR (400 MHz, CDCl<sub>3</sub>) spectrum of compound **15**

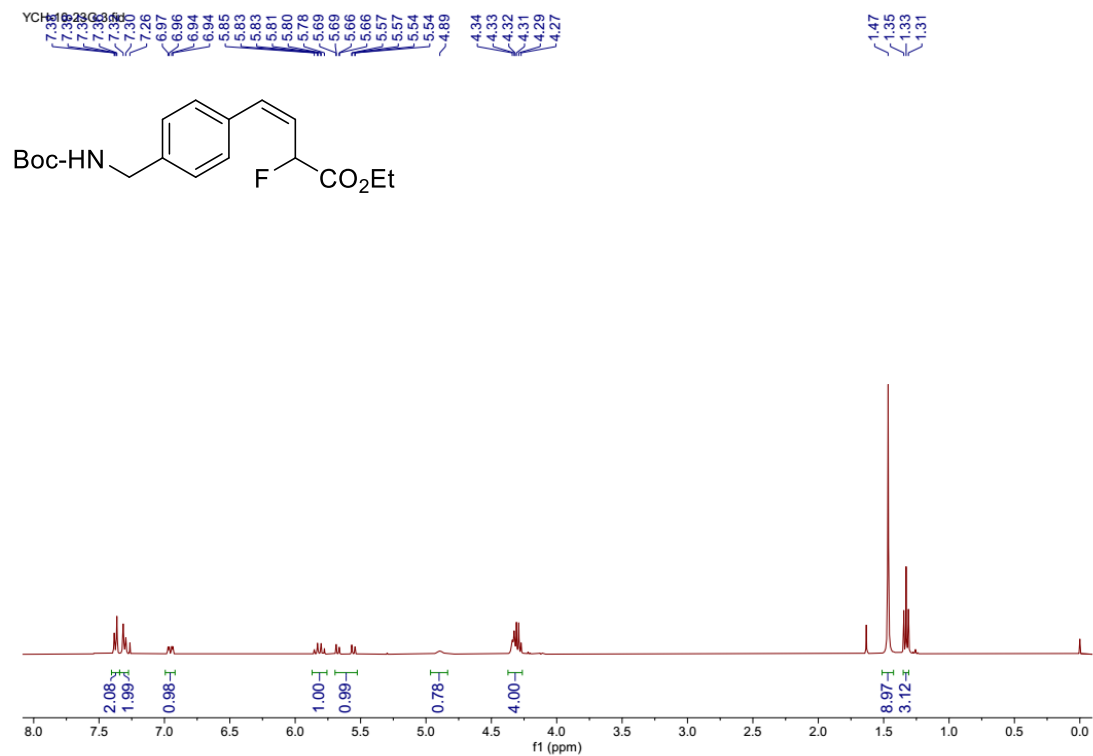

<sup>19</sup>F NMR (376 MHz, Chloroform-*d*) spectrum of compound **15**

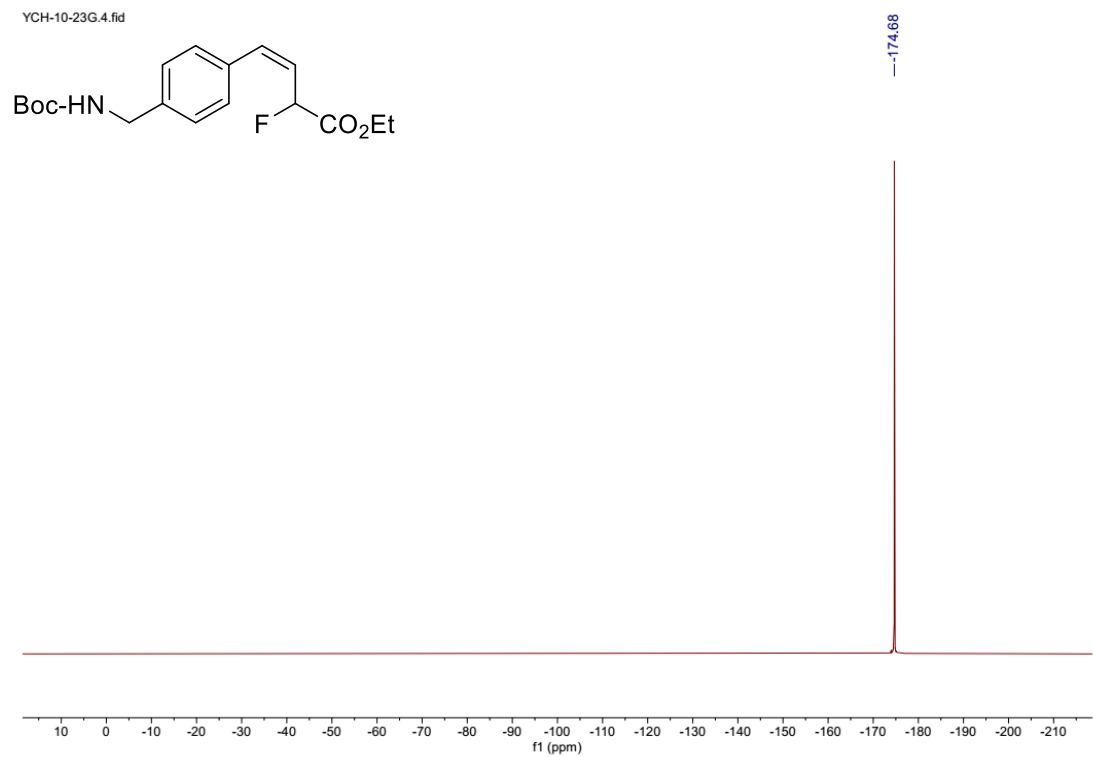

$^{13}\text{C}$  NMR (101 MHz, Chloroform-*d*) spectrum of compound **15**

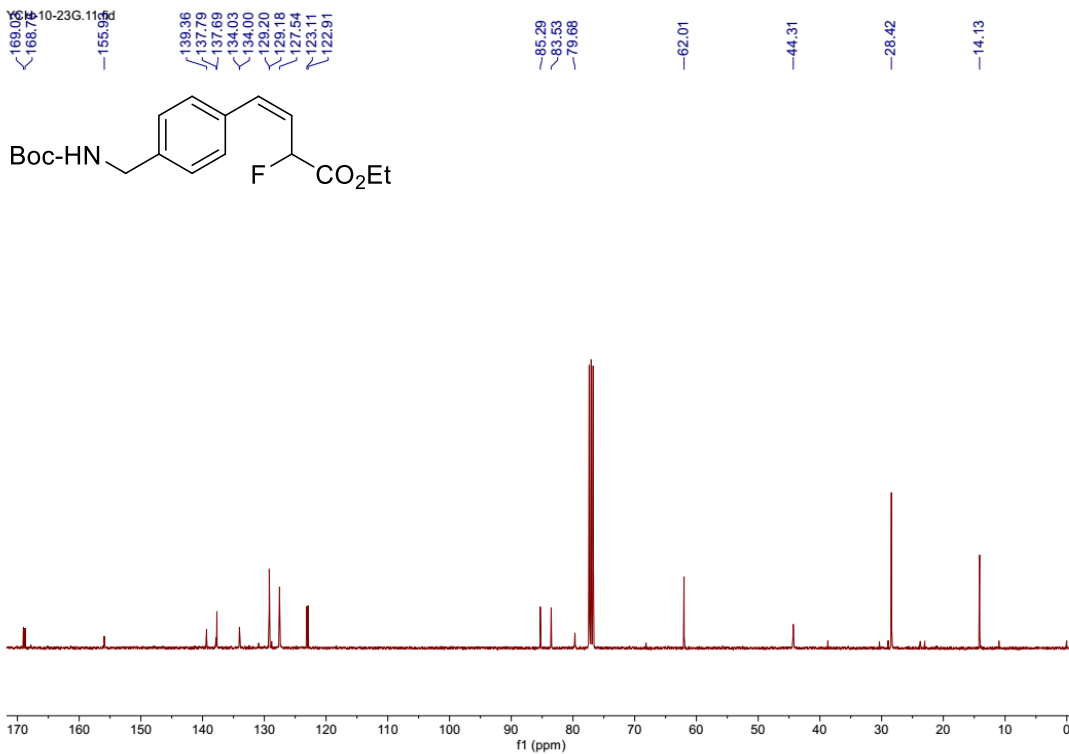

$^1\text{H}$  NMR (400 MHz,  $\text{CDCl}_3$ ) spectrum of compound **16**

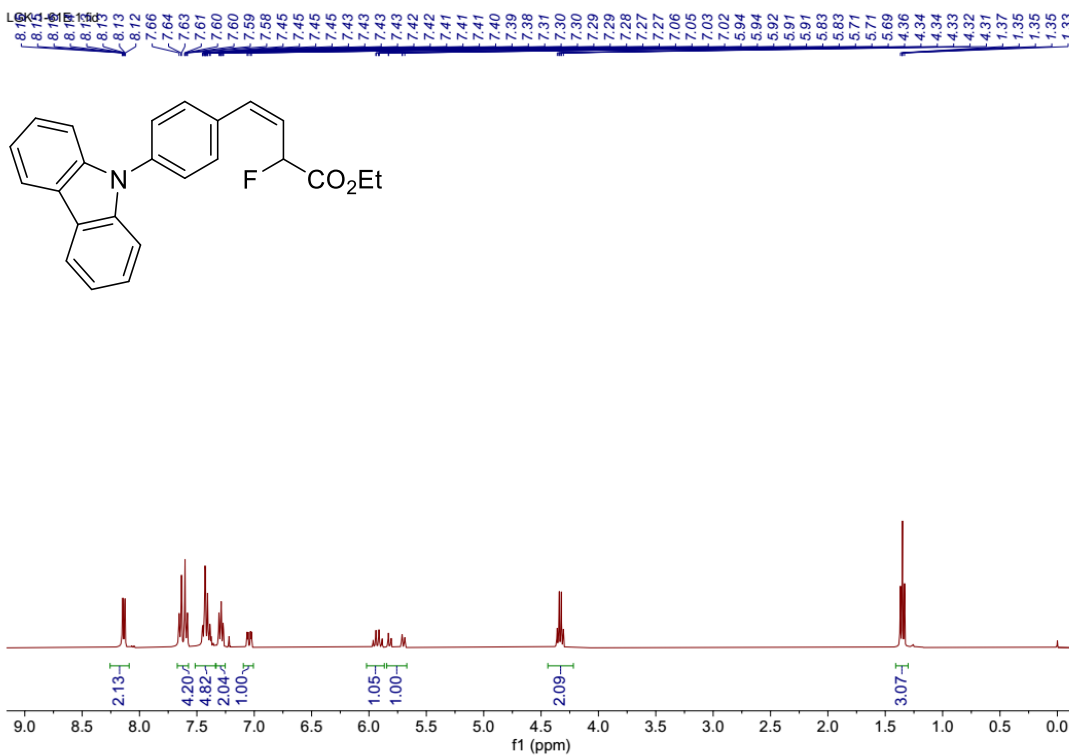

<sup>19</sup>F NMR (376 MHz, Chloroform-*d*) spectrum of compound **16**

LGK-1-61E.2.fid

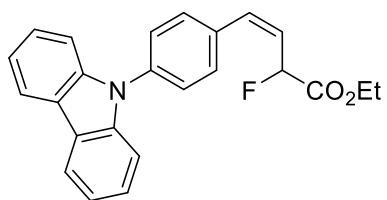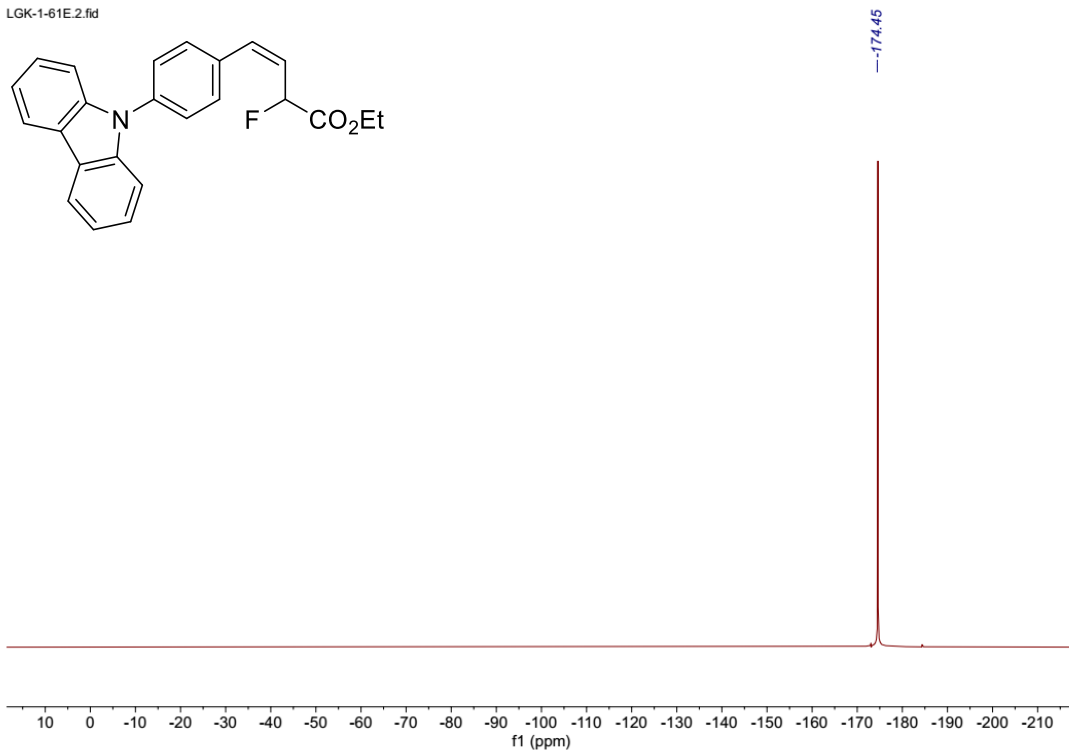

<sup>13</sup>C NMR (101 MHz, Chloroform-*d*) spectrum of compound **16**

LGK-1-61E.3.fid

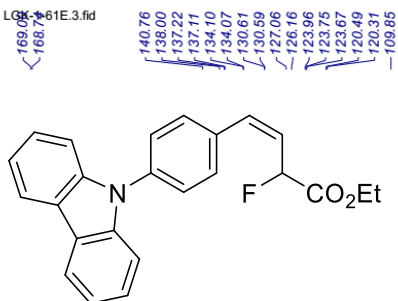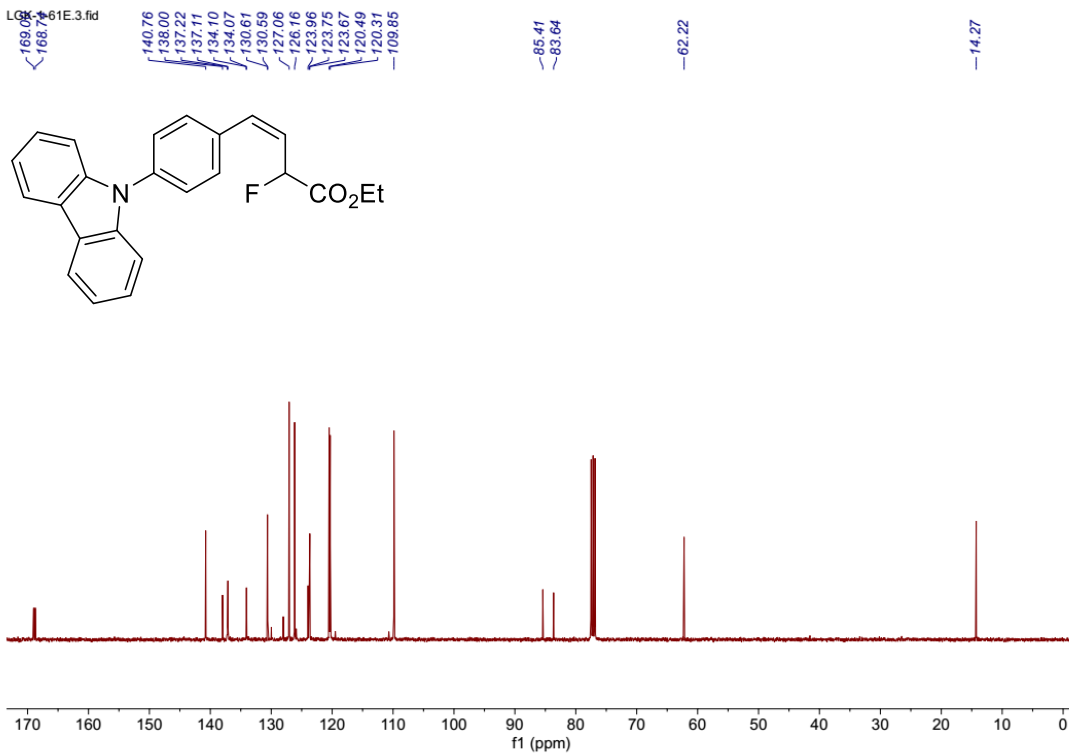



<sup>1</sup>H NMR (400 MHz, CDCl<sub>3</sub>) spectrum of compound **17**

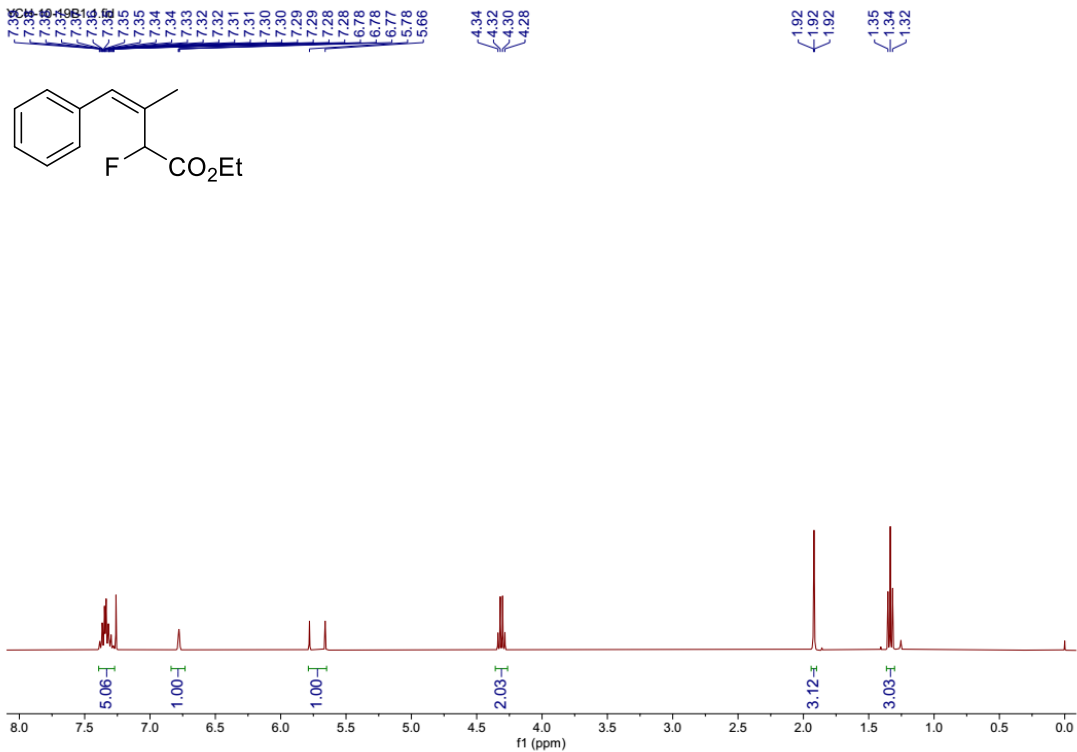

<sup>19</sup>F NMR (376 MHz, Chloroform-*d*) spectrum of compound **17**

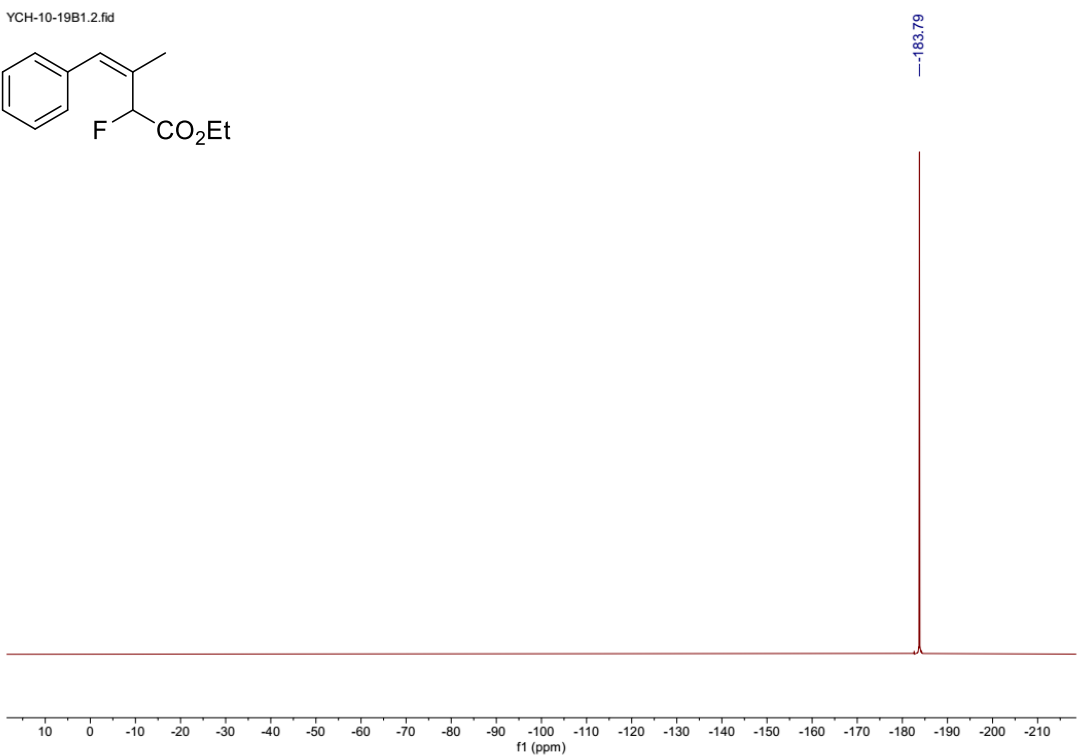

$^{13}\text{C}$  NMR (101 MHz, Chloroform-*d*) spectrum of compound **17**

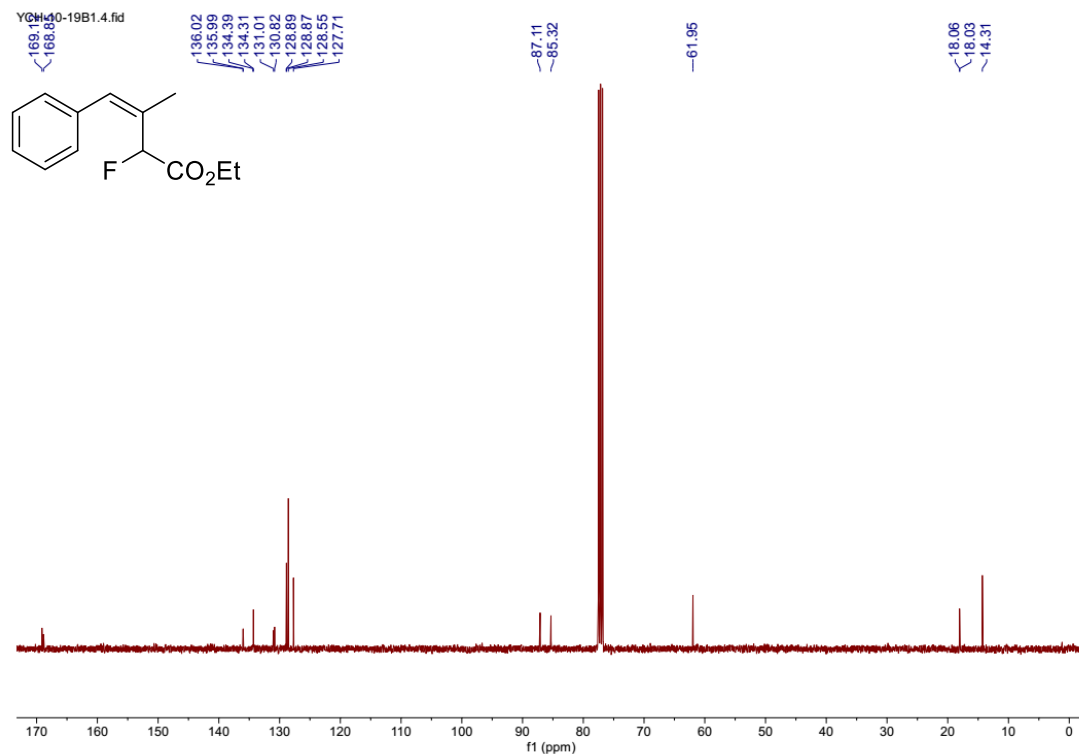

$^1\text{H}$  NMR (400 MHz,  $\text{CDCl}_3$ ) spectrum of compound **18**

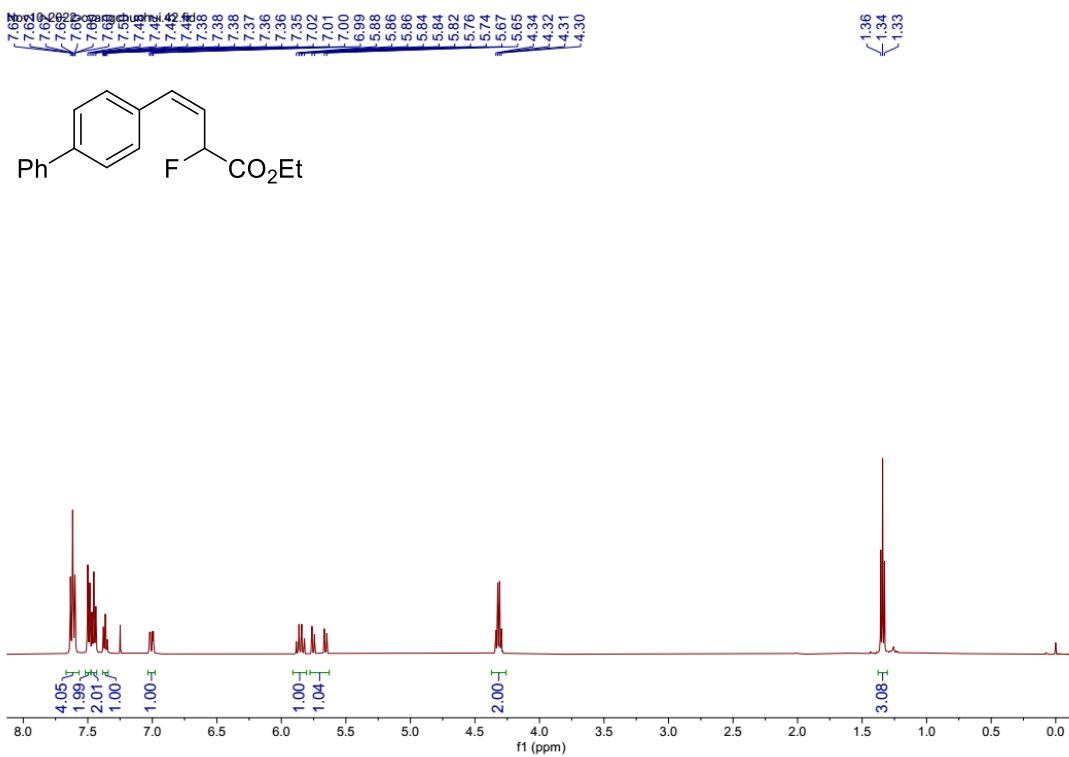

$^{19}\text{F}$  NMR (376 MHz, Chloroform-*d*) spectrum of compound **18**

YCH-9-48A.2.fid

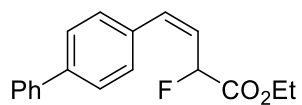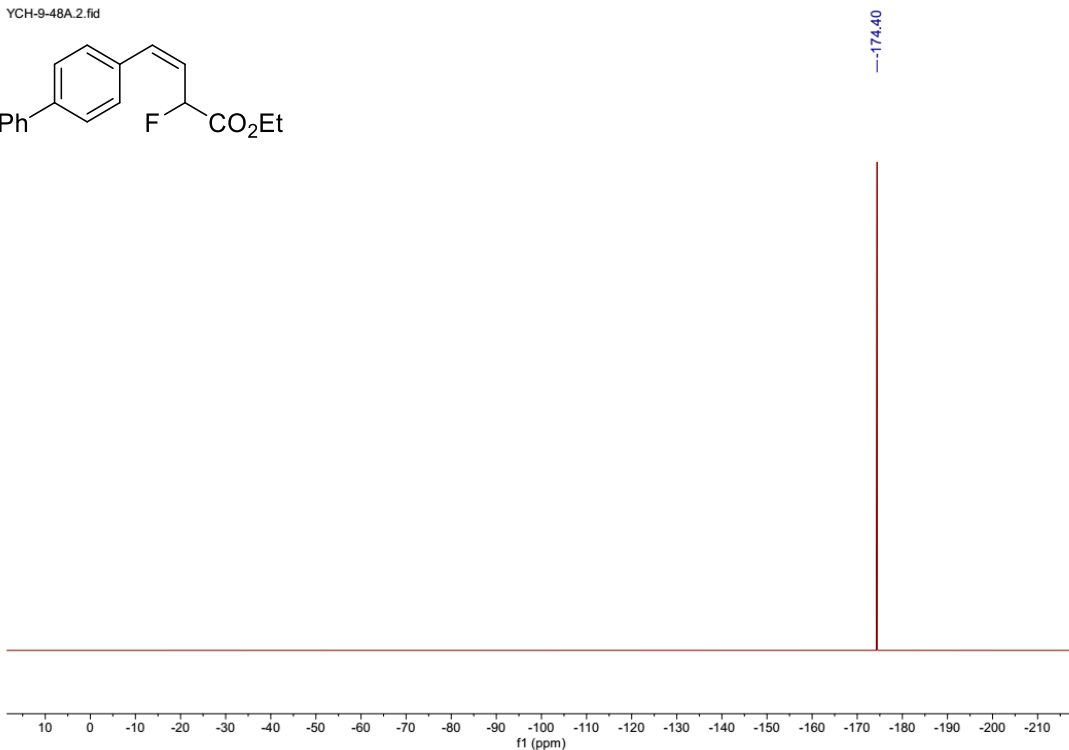

$^{13}\text{C}$  NMR (101 MHz, Chloroform-*d*) spectrum of compound **18**

Nov 10 2022-cyangchunhui

167.90  
167.77  
140.21  
139.33  
136.61  
136.61  
132.95  
132.82  
128.40  
128.38  
127.84  
126.59  
126.18  
126.03  
122.16  
122.00  
84.17  
82.76  
60.95  
13.09

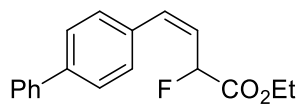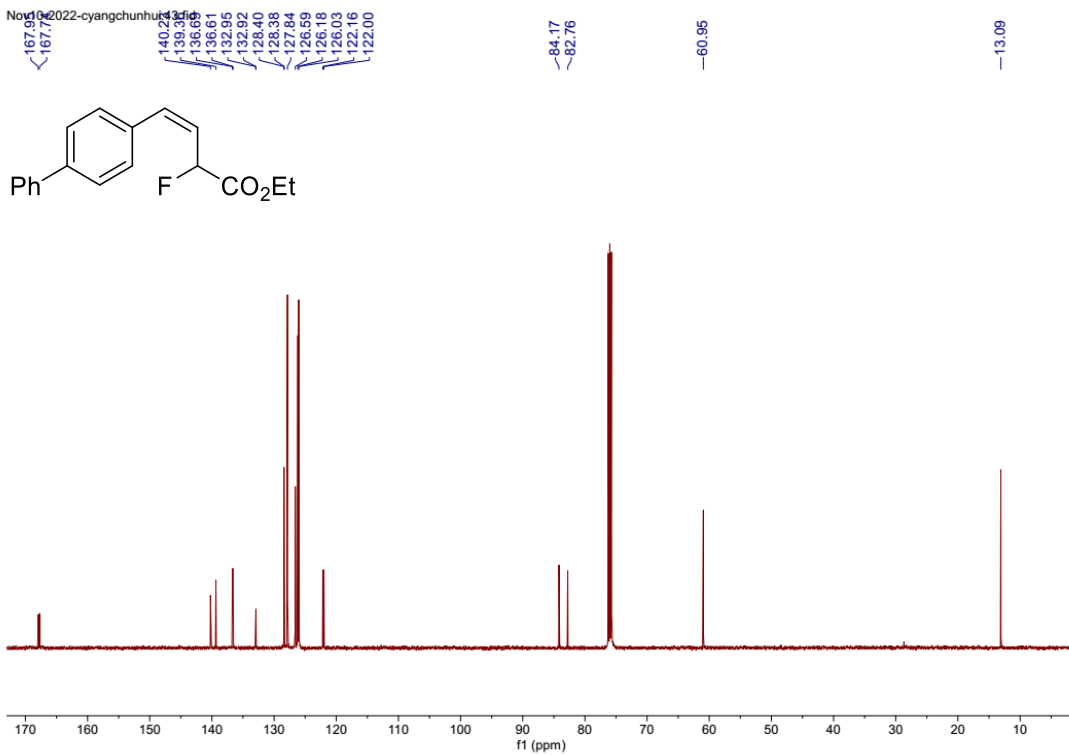

<sup>1</sup>H NMR (400 MHz, CDCl<sub>3</sub>) spectrum of compound **19**

YCH-9-46E  
7.860  
7.840  
7.838  
7.10  
7.09  
7.08  
7.07  
6.95  
6.94  
6.92  
6.91  
5.86  
5.83  
5.81  
5.80  
5.78  
5.66  
5.64  
5.63  
5.64  
5.64  
5.62  
5.91  
4.33  
4.32  
4.28  
4.28

1.35  
1.33  
1.33  
1.32

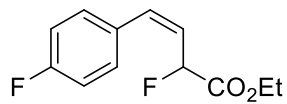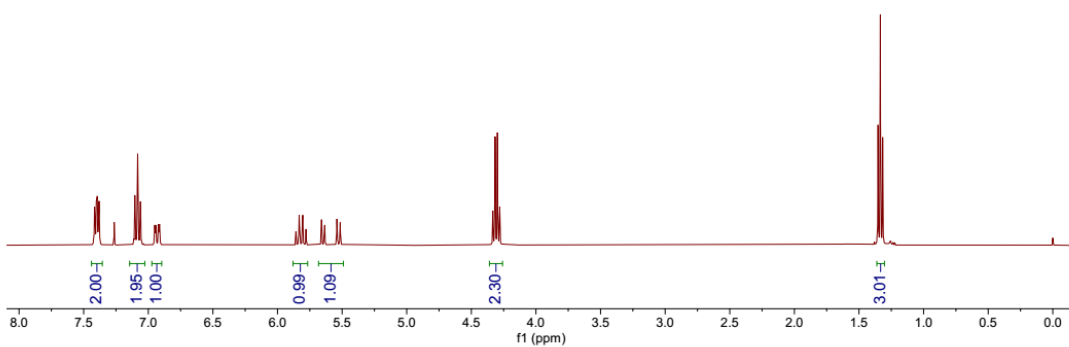

<sup>19</sup>F NMR (376 MHz, Chloroform-*d*) spectrum of compound **19**

YCH-9-46E.2.fid

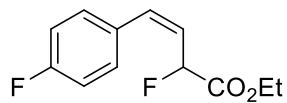

-112.78

-174.79

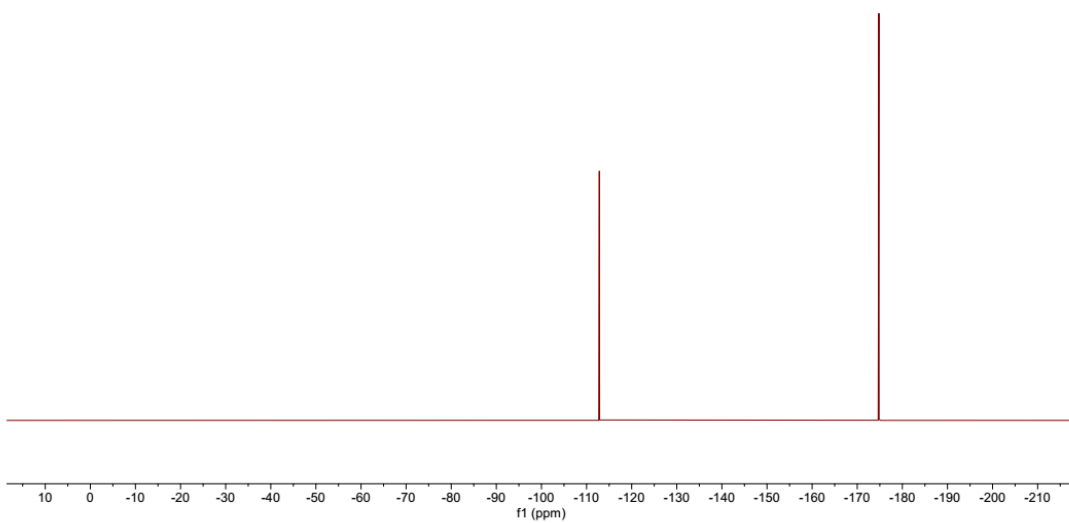

<sup>13</sup>C NMR (101 MHz, Chloroform-*d*) spectrum of compound **19**

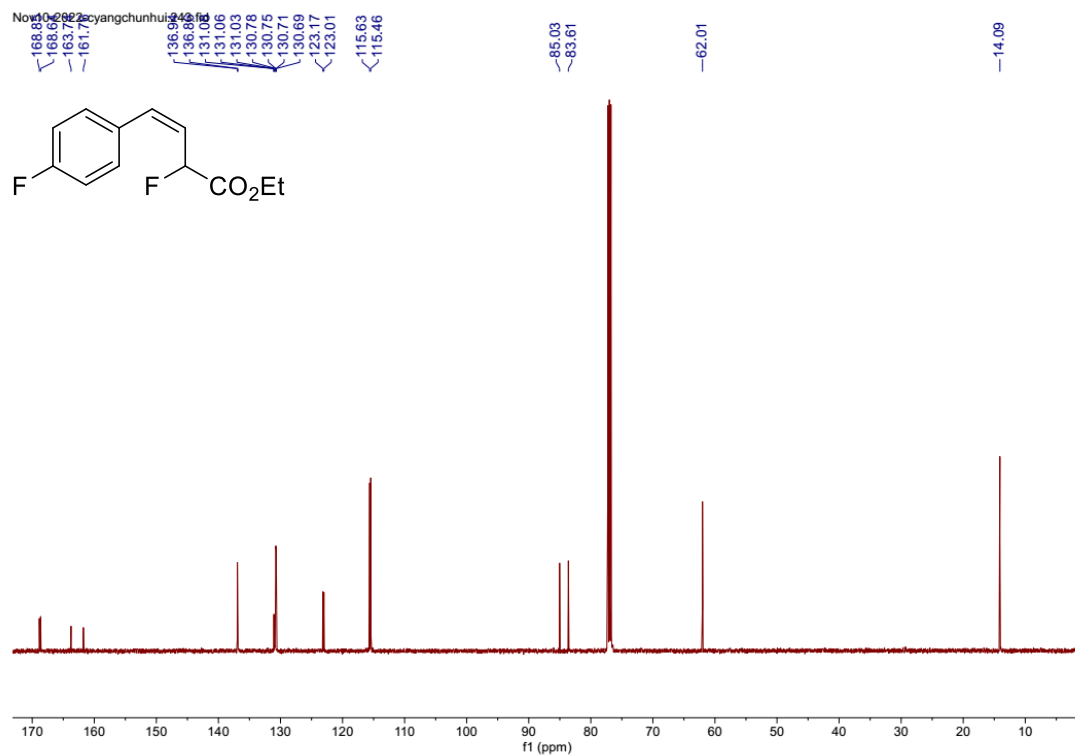

<sup>1</sup>H NMR (400 MHz, CDCl<sub>3</sub>) spectrum of compound **20**

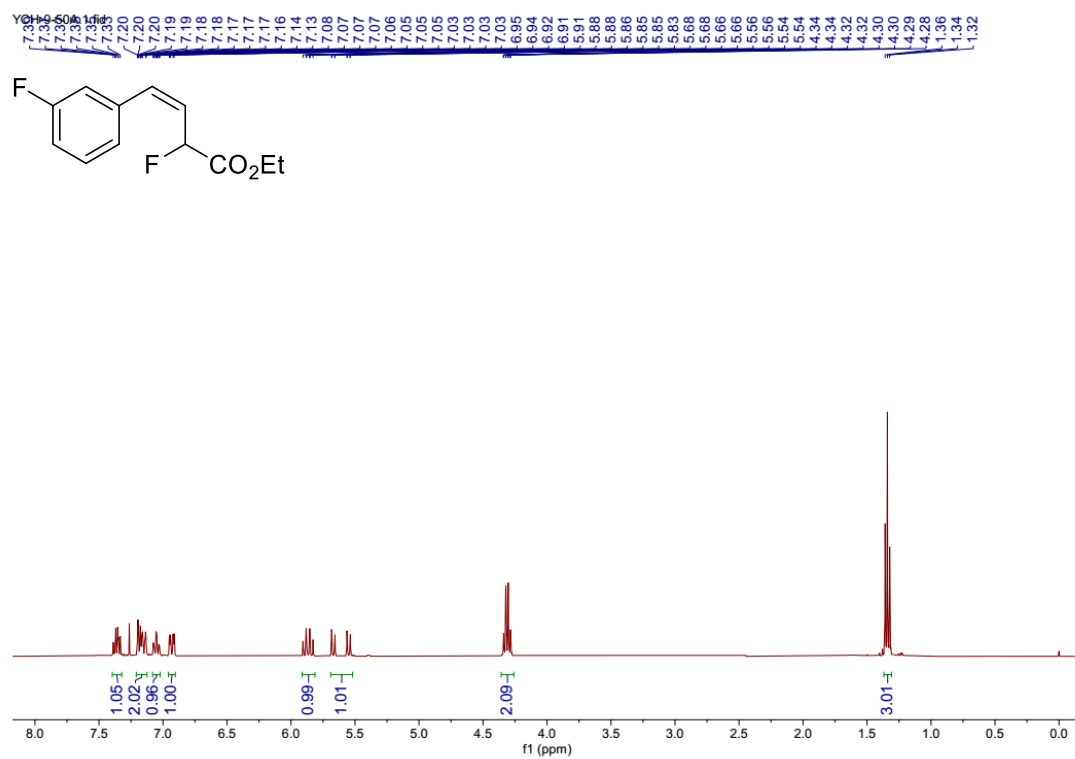

<sup>19</sup>F NMR (376 MHz, Chloroform-*d*) spectrum of compound **20**

YCH-9-50A.2.fid

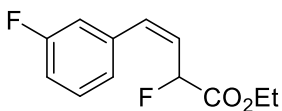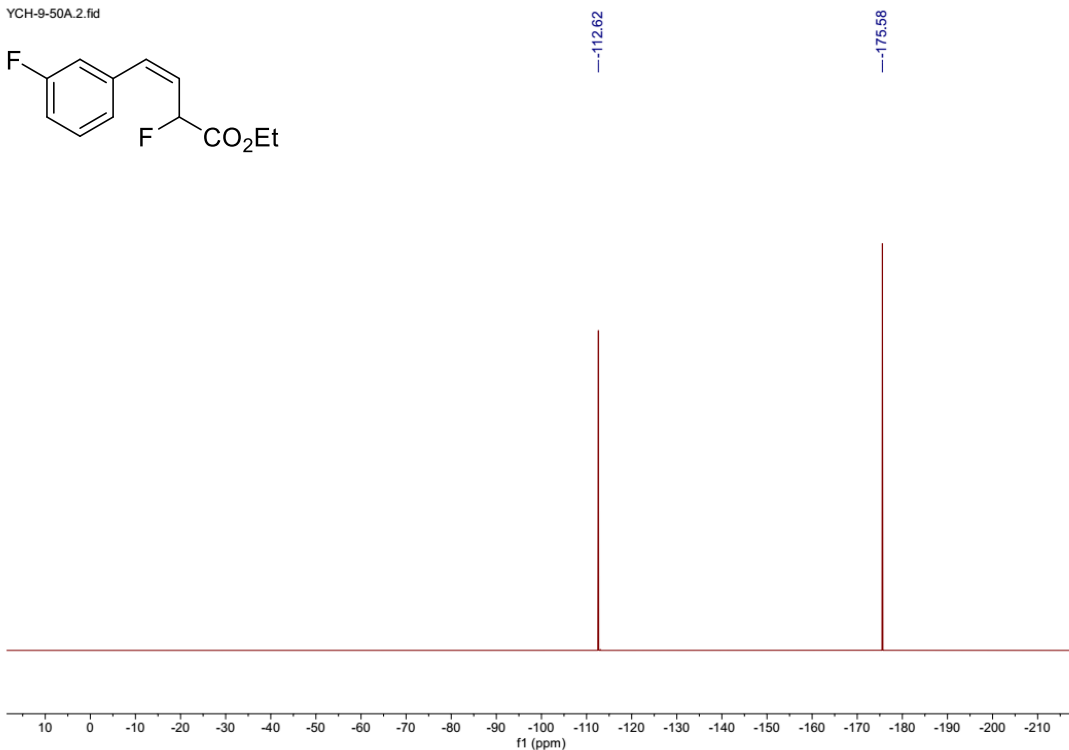

<sup>13</sup>C NMR (101 MHz, Chloroform-*d*) spectrum of compound **20**

YCH-9-50A.3.fid

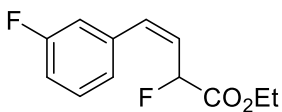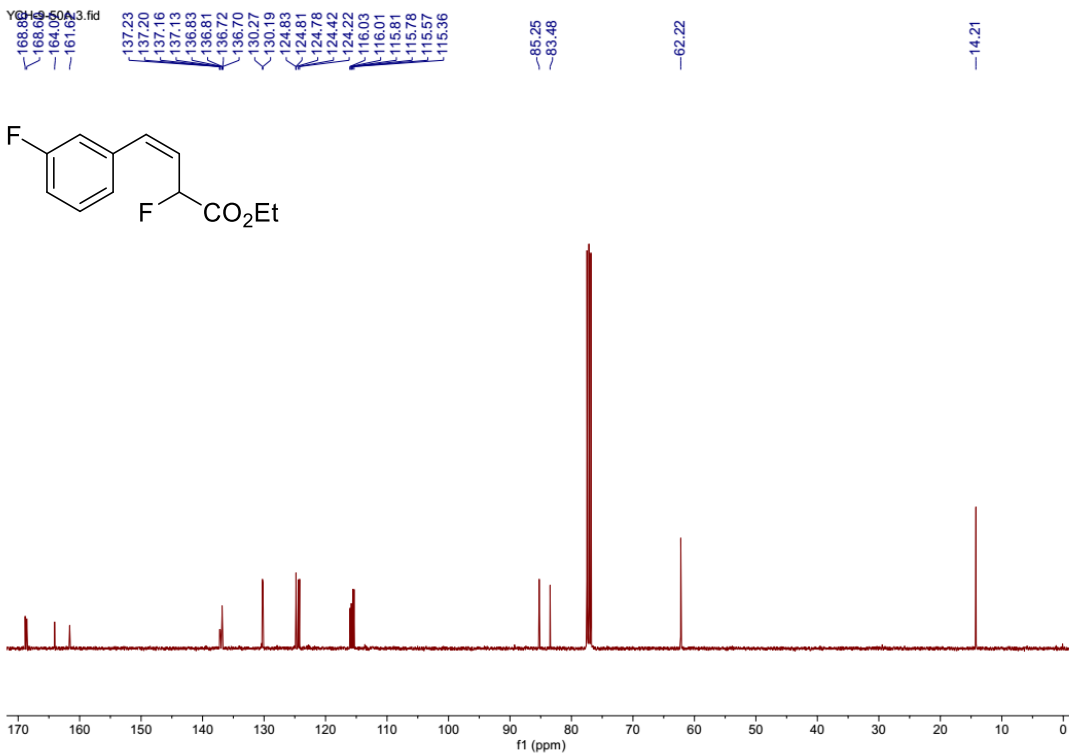

<sup>1</sup>H NMR (400 MHz, CDCl<sub>3</sub>) spectrum of compound **21**

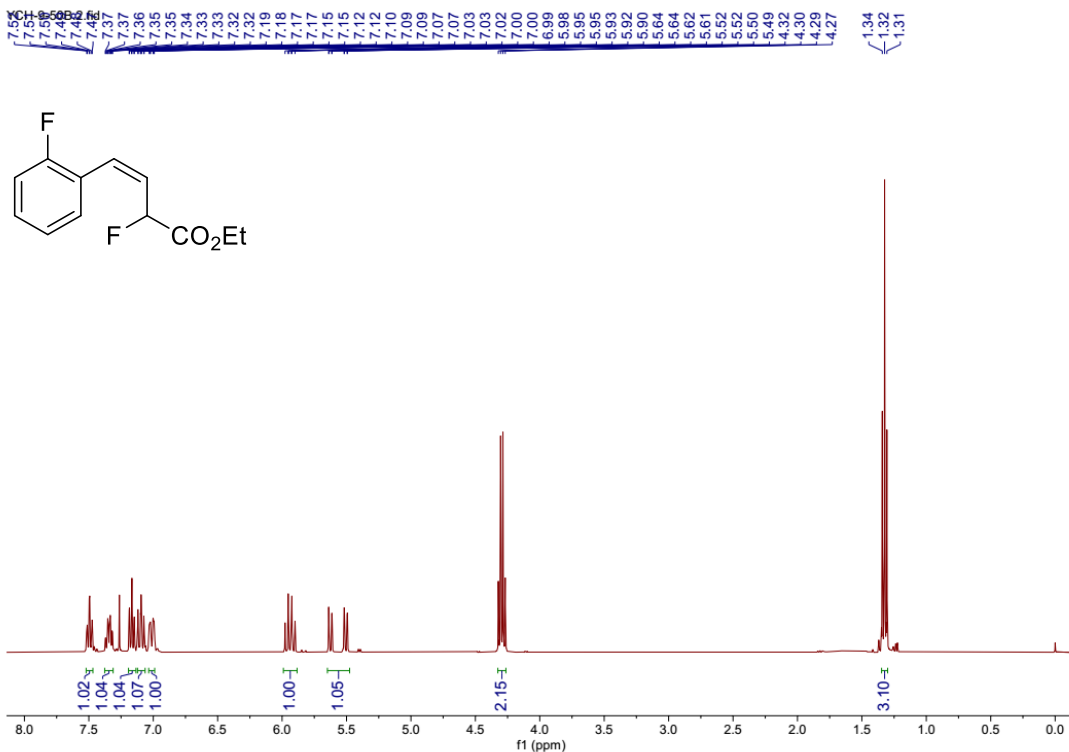

<sup>19</sup>F NMR (376 MHz, Chloroform-*d*) spectrum of compound **21**

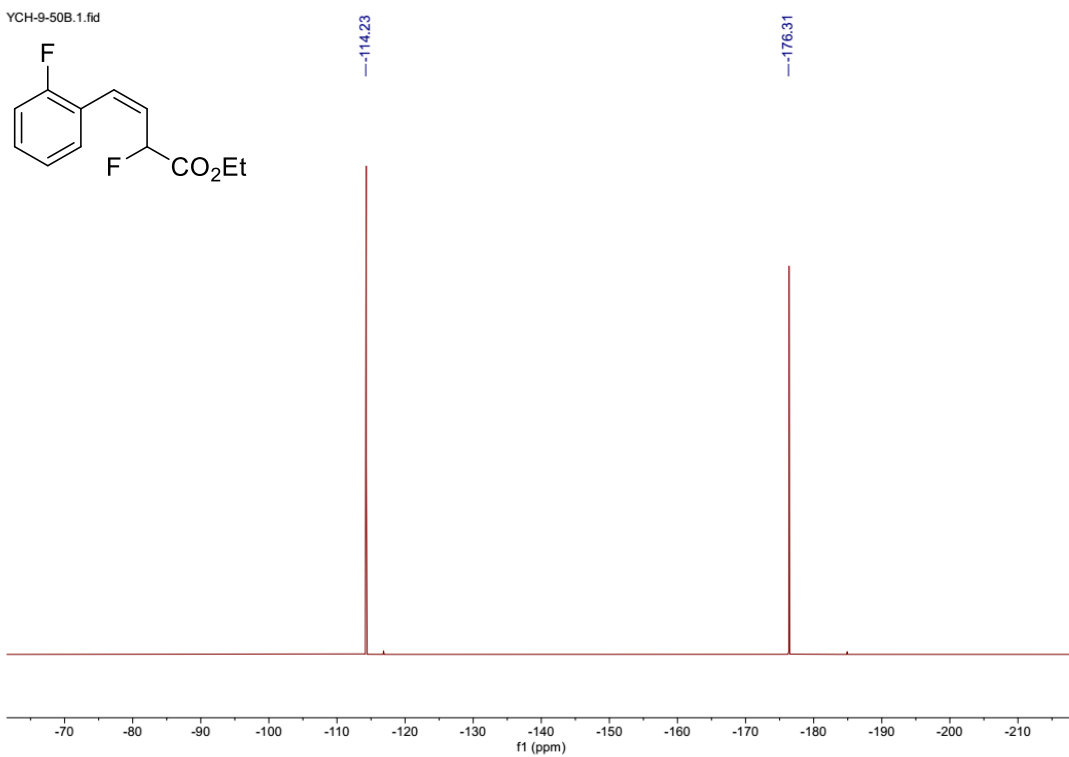

$^{13}\text{C}$  NMR (101 MHz, Chloroform-*d*) spectrum of compound **21**

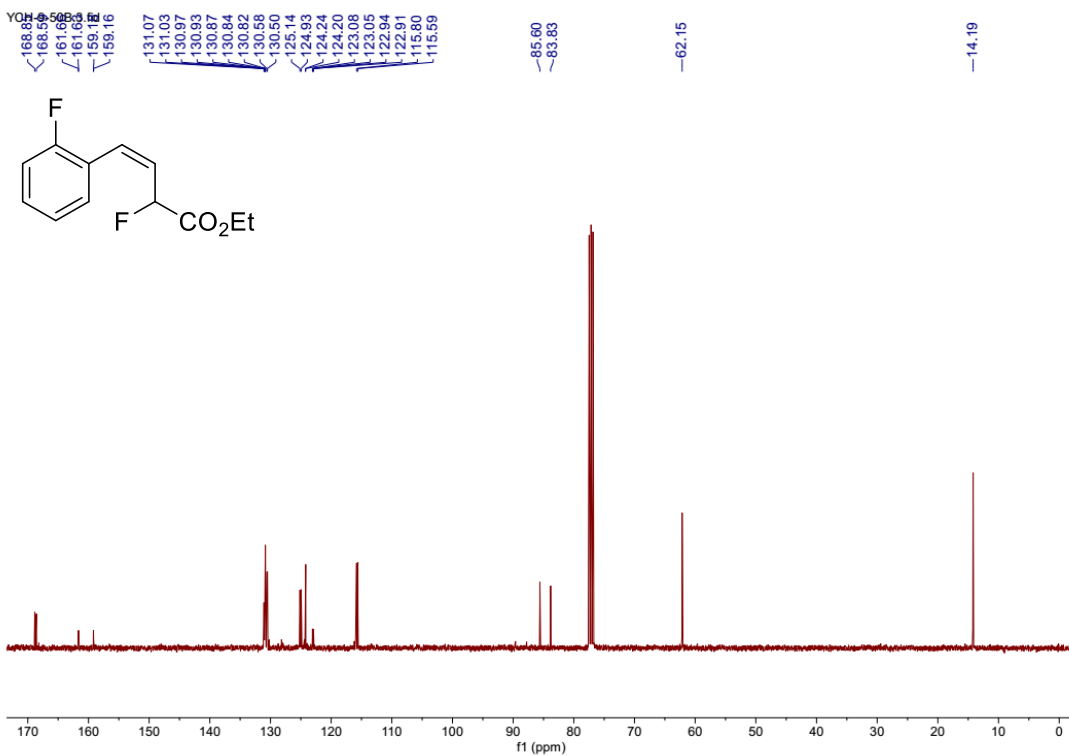

$^1\text{H}$  NMR (400 MHz,  $\text{CDCl}_3$ ) spectrum of compound **22**

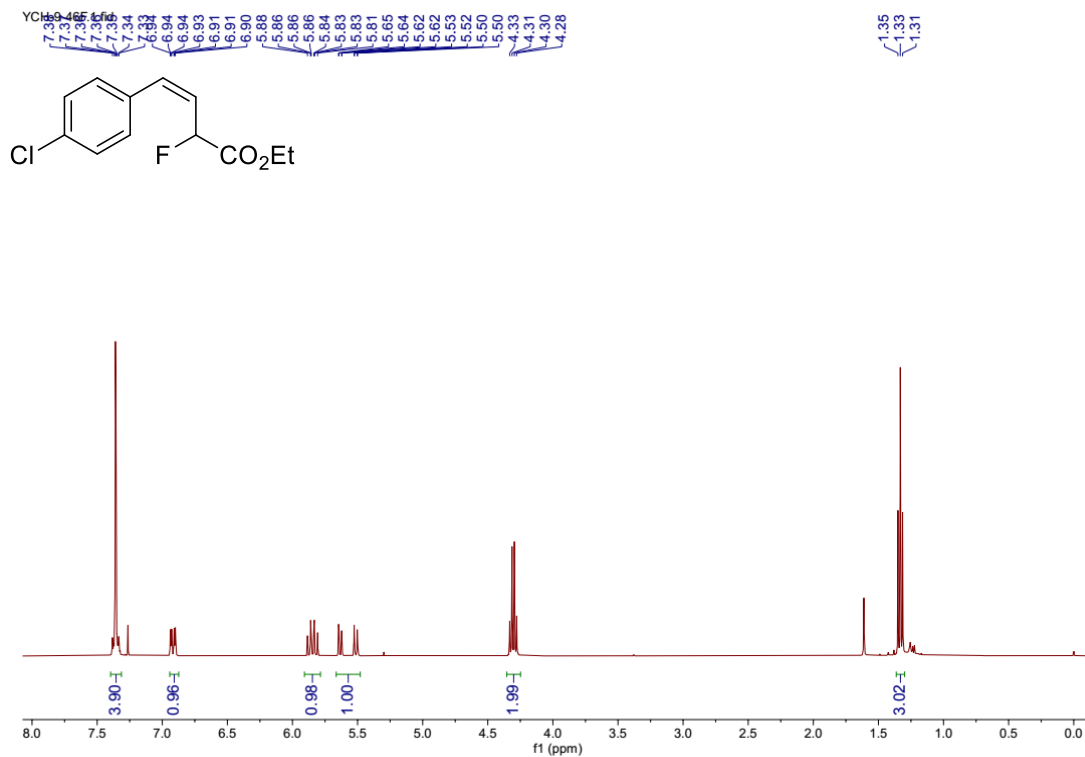



$^{19}\text{F}$  NMR (376 MHz, Chloroform-*d*) spectrum of compound **22**

YCH-9-46F.2.fid

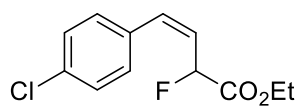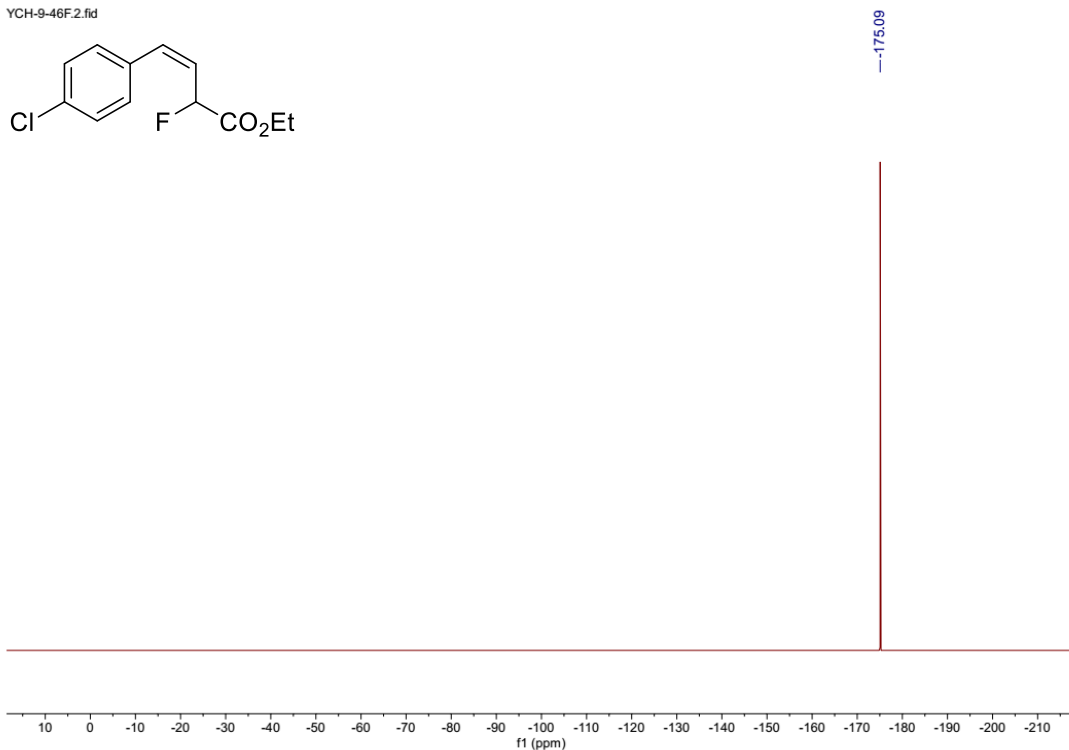

$^{13}\text{C}$  NMR (101 MHz, Chloroform-*d*) spectrum of compound **22**

Nov 10 2022-cyangchunhui.81.fid

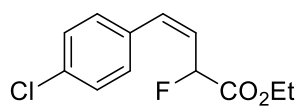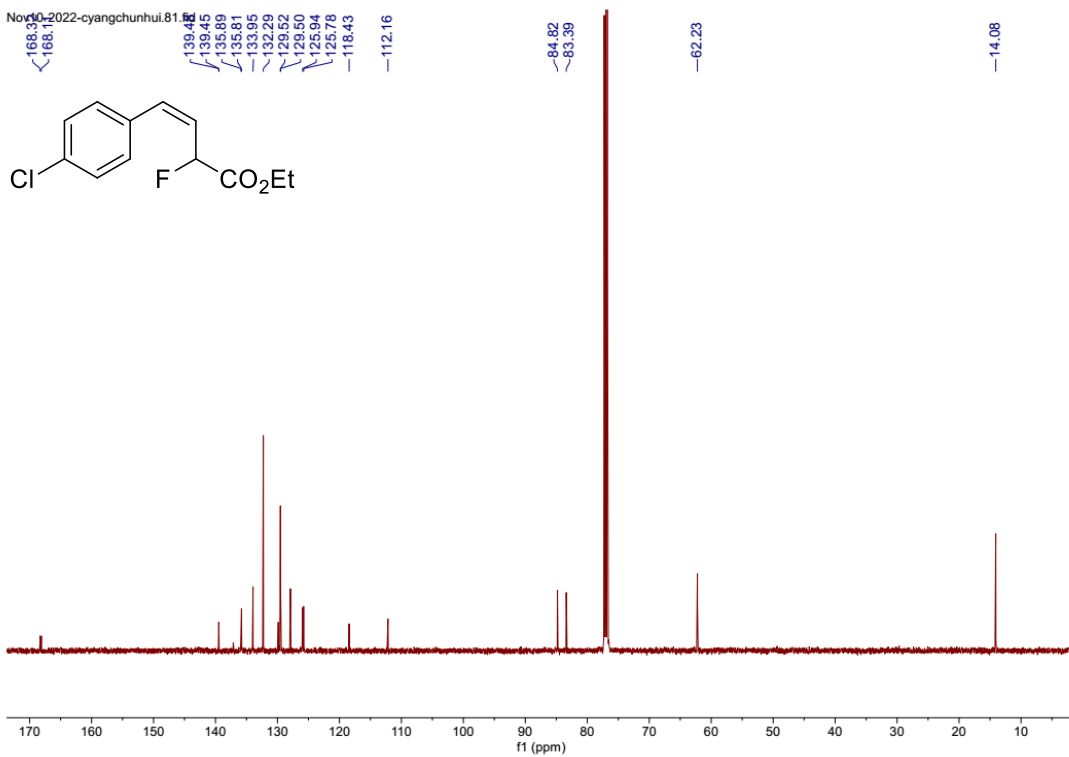

<sup>1</sup>H NMR (400 MHz, CDCl<sub>3</sub>) spectrum of compound **23**

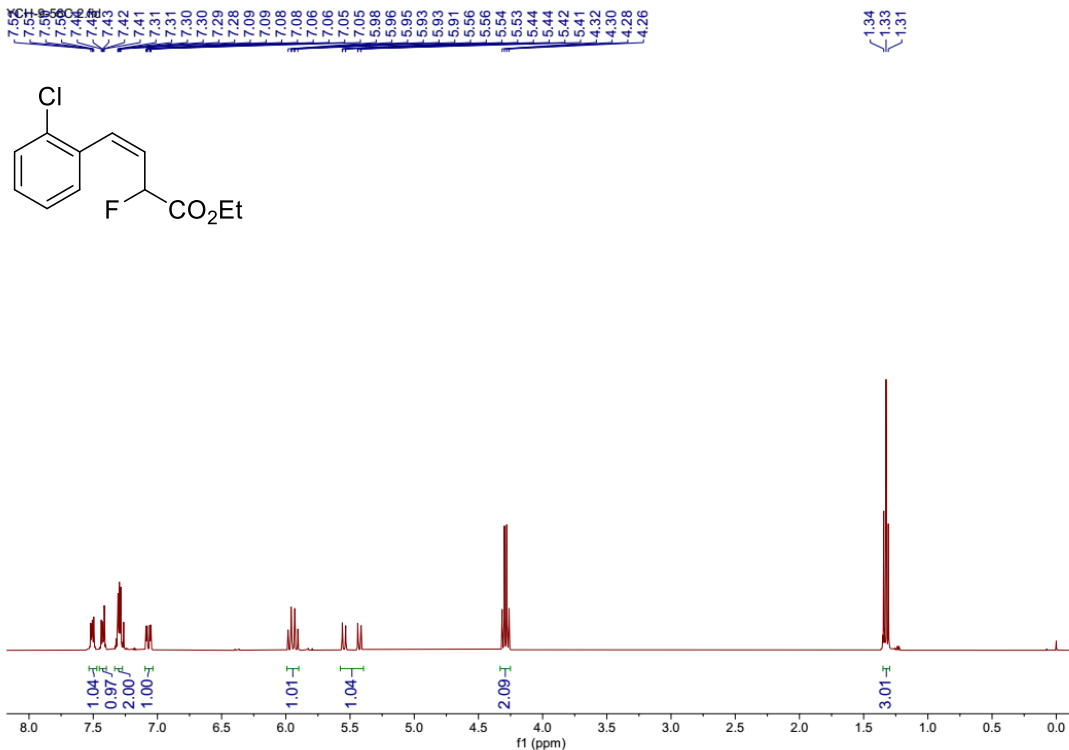

<sup>19</sup>F NMR (376 MHz, Chloroform-*d*) spectrum of compound **23**

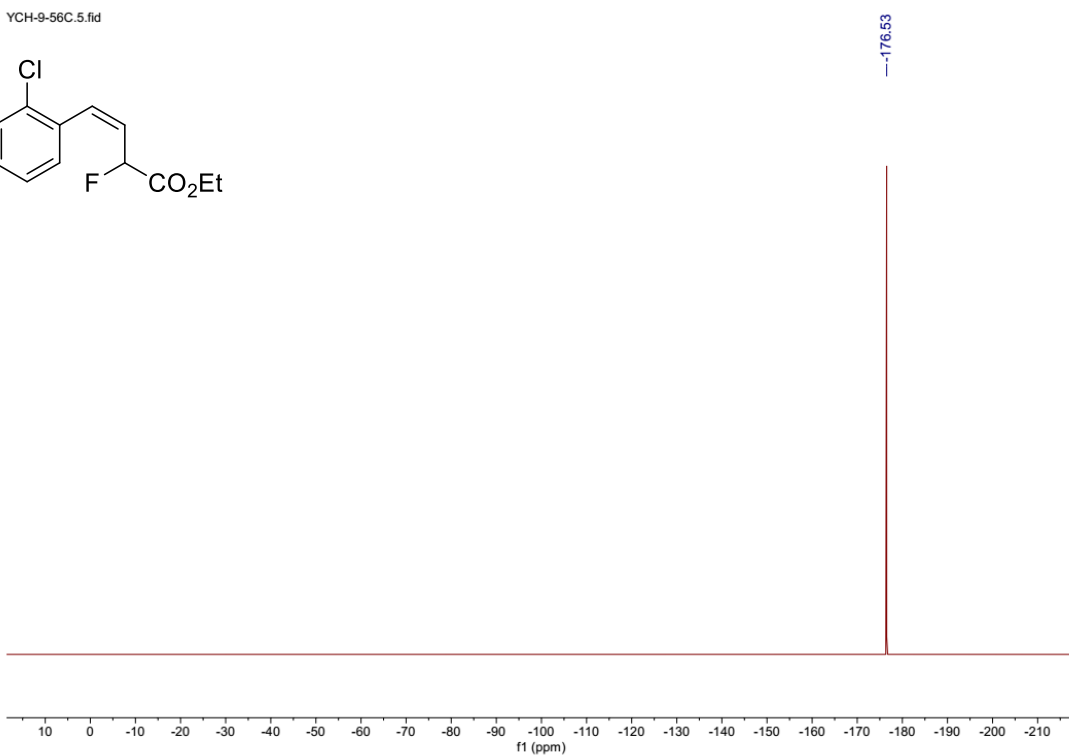

$^{13}\text{C}$  NMR (101 MHz, Chloroform-*d*) spectrum of compound **23**

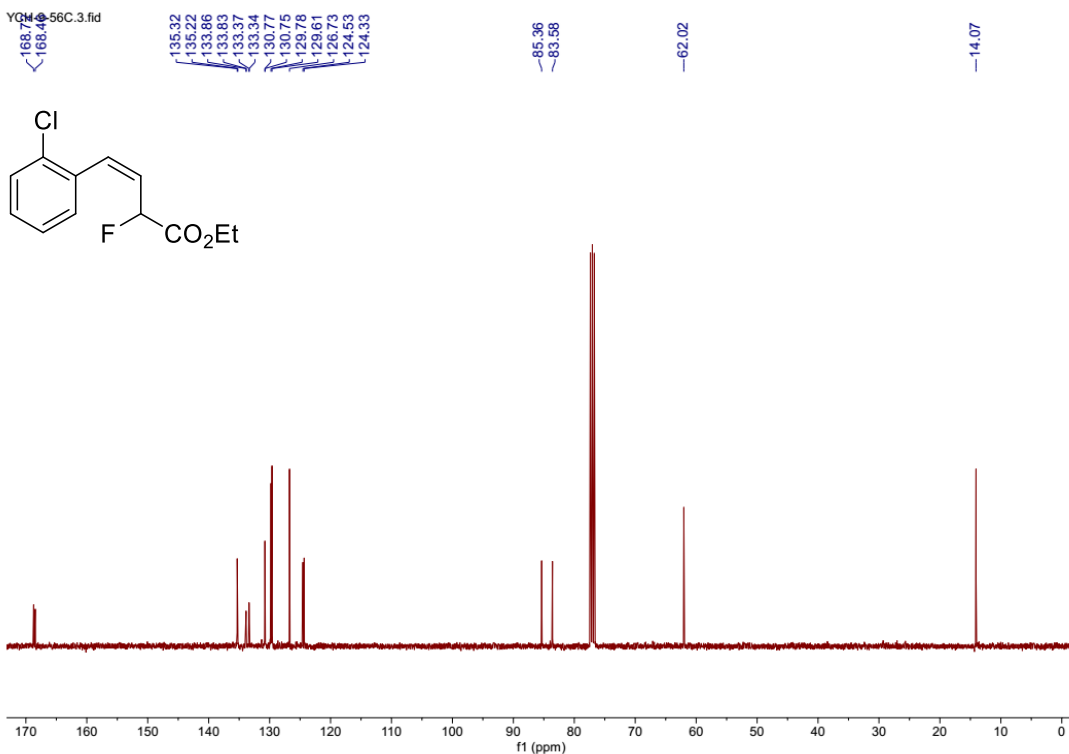

$^1\text{H}$  NMR (400 MHz,  $\text{CDCl}_3$ ) spectrum of compound **24**

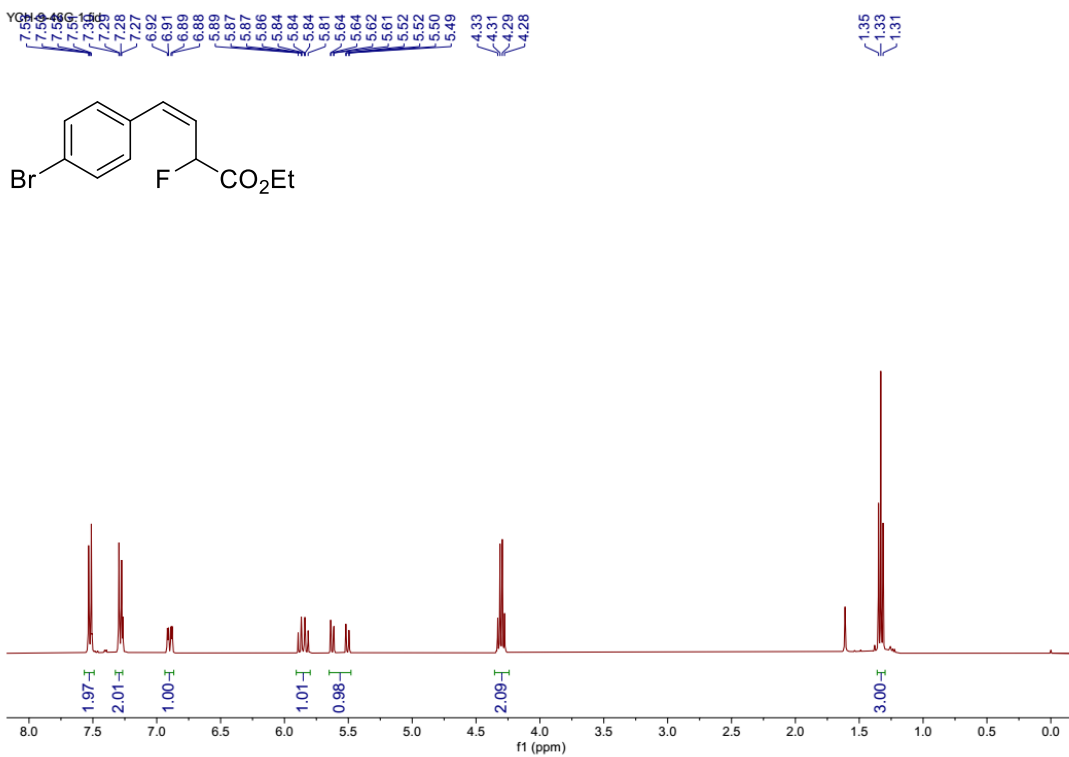

<sup>19</sup>F NMR (376 MHz, Chloroform-*d*) spectrum of compound **24**

YCH-9-46G.2.fid

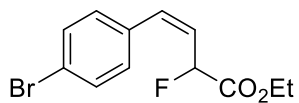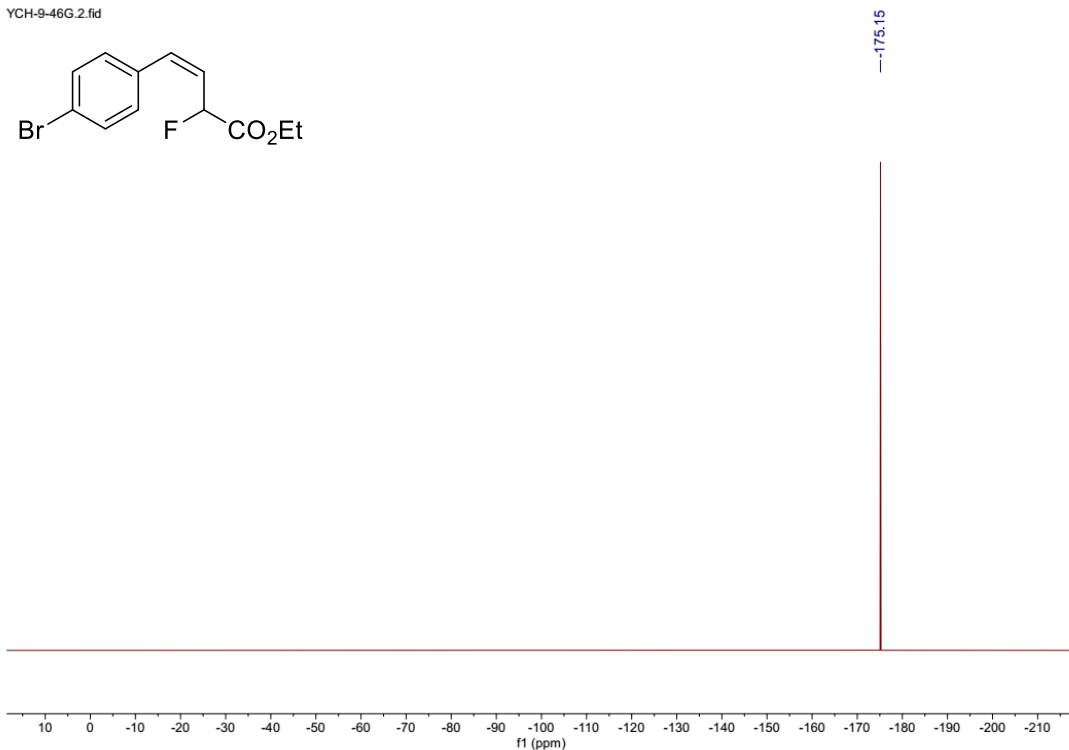

<sup>13</sup>C NMR (101 MHz, Chloroform-*d*) spectrum of compound **24**

Nov 10 2022-cyangchunhui.33.fid

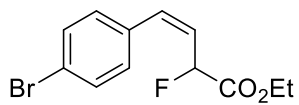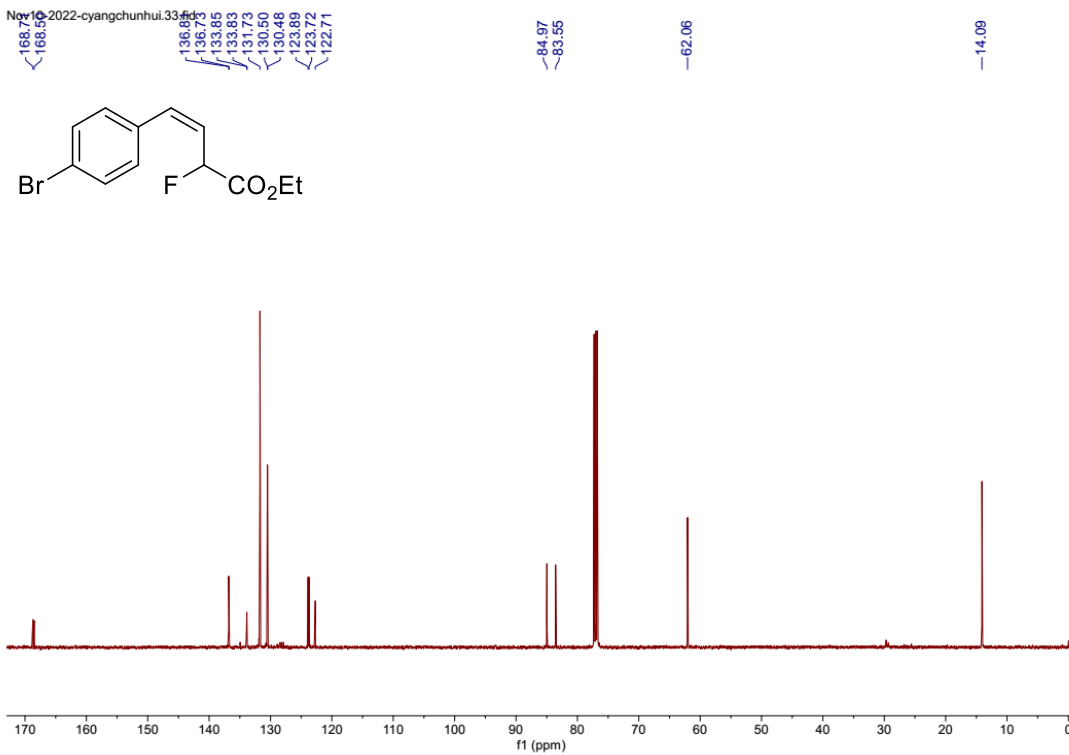

<sup>1</sup>H NMR (400 MHz, CDCl<sub>3</sub>) spectrum of compound **25**

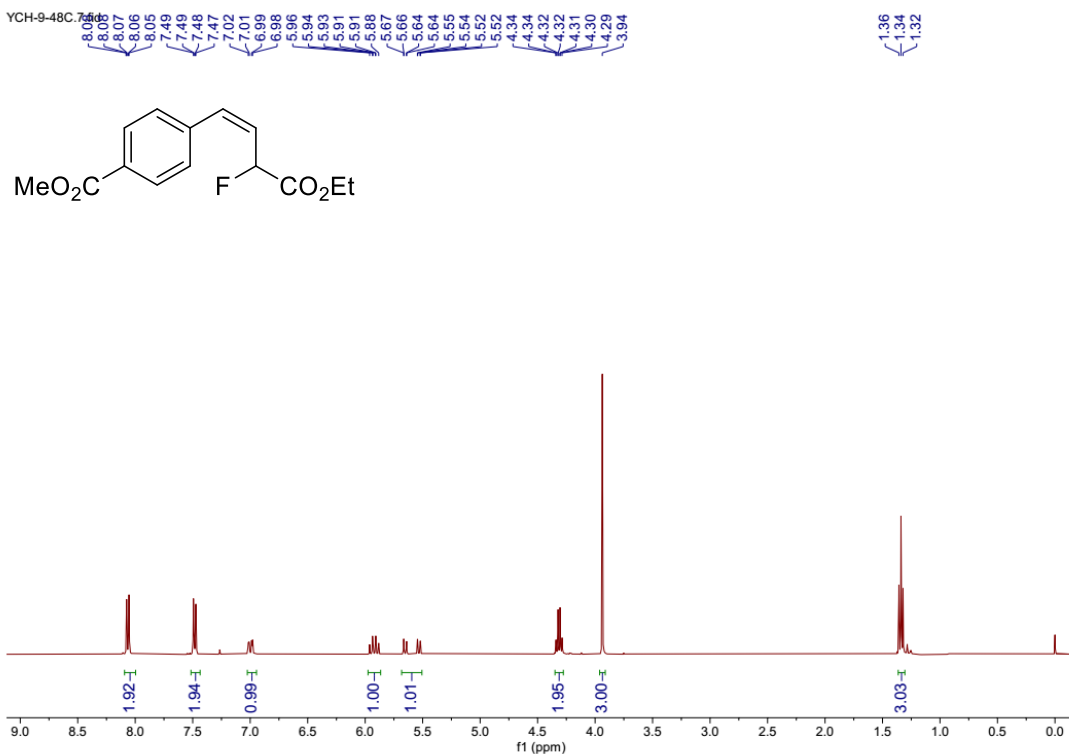

<sup>19</sup>F NMR (376 MHz, Chloroform-*d*) spectrum of compound **25**

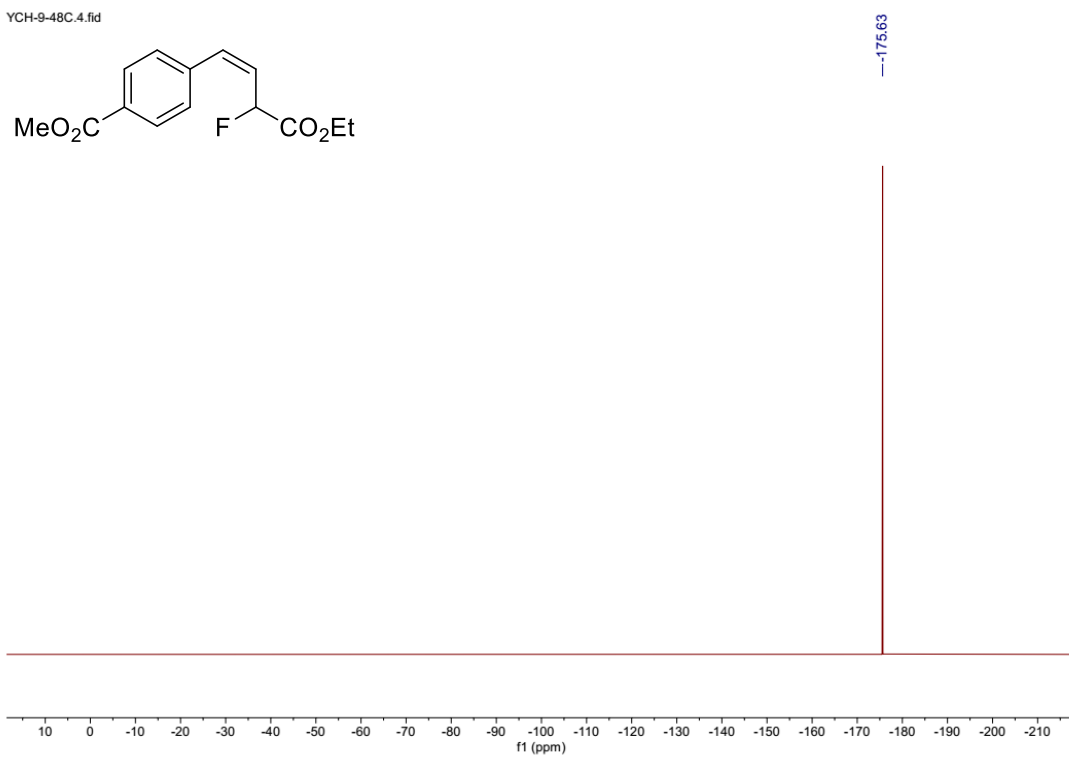

<sup>13</sup>C NMR (101 MHz, Chloroform-*d*) spectrum of compound **25**

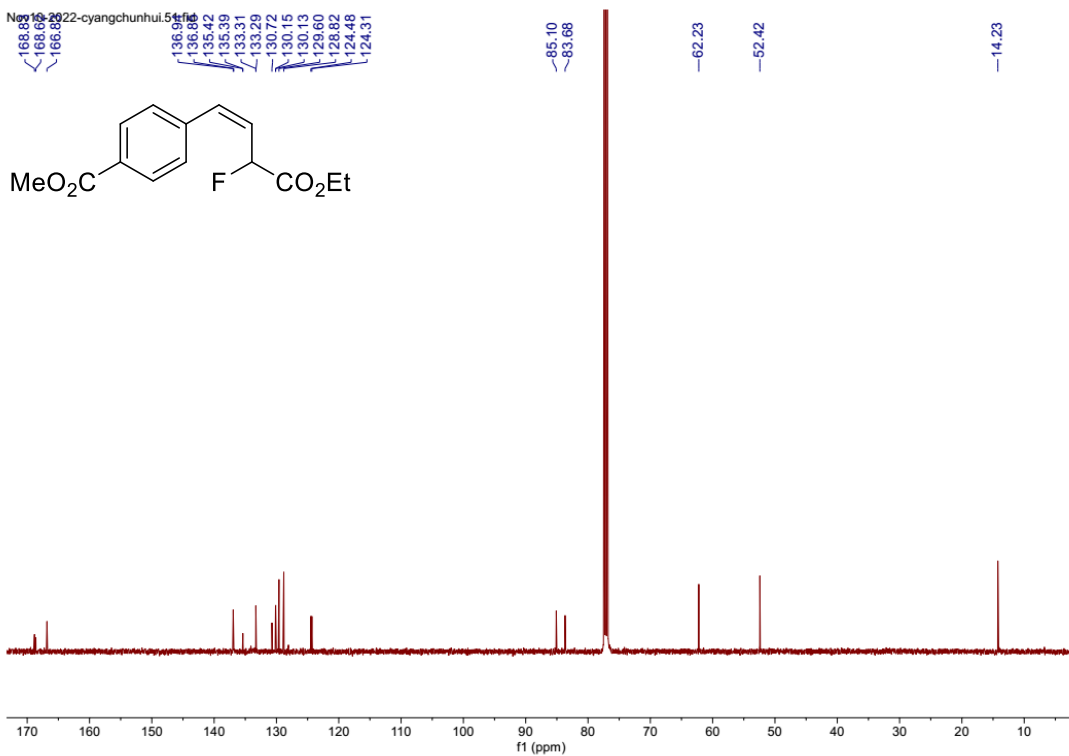

<sup>1</sup>H NMR (400 MHz, CDCl<sub>3</sub>) spectrum of compound **26**

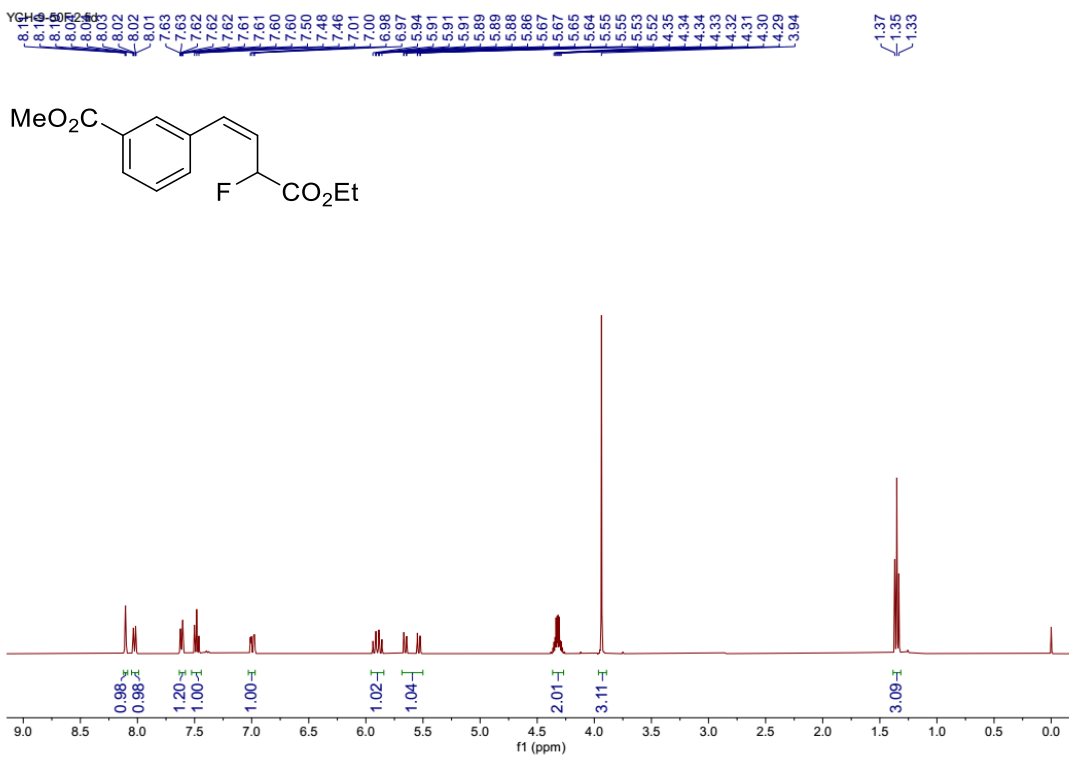

$^{19}\text{F}$  NMR (376 MHz, Chloroform-*d*) spectrum of compound **26**

YCH-9-50F.3.fid

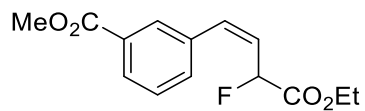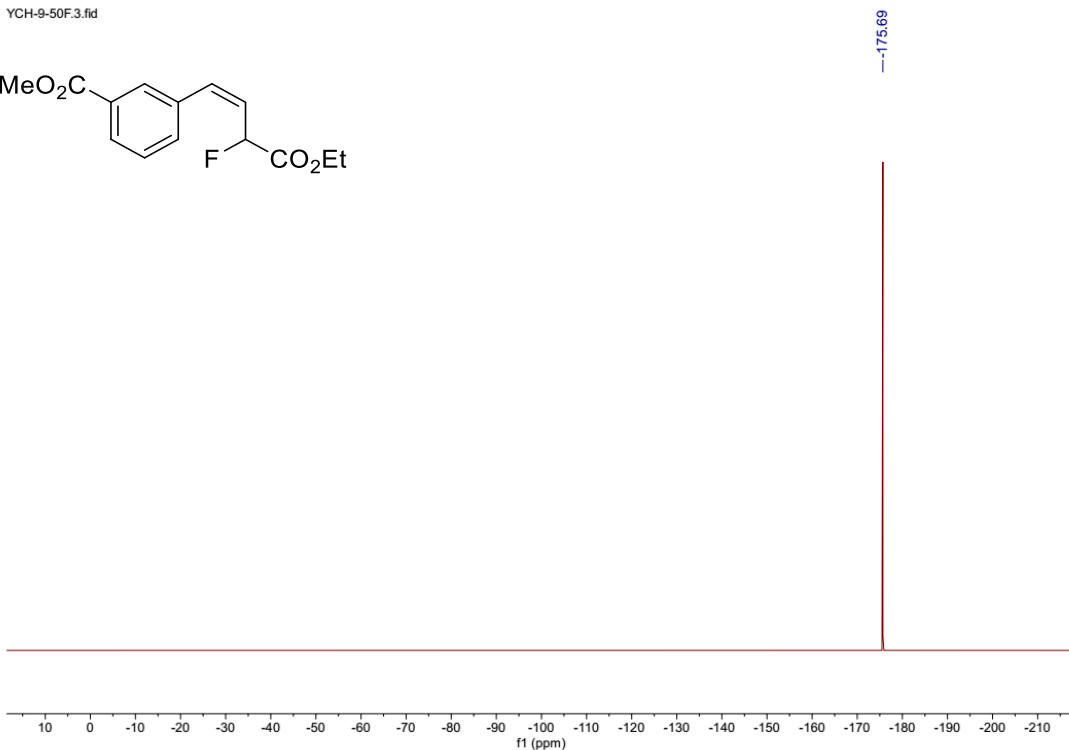

$^{13}\text{C}$  NMR (101 MHz, Chloroform-*d*) spectrum of compound **26**

YCH-9-50F.1.fid

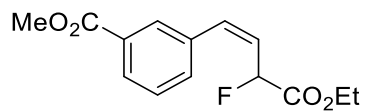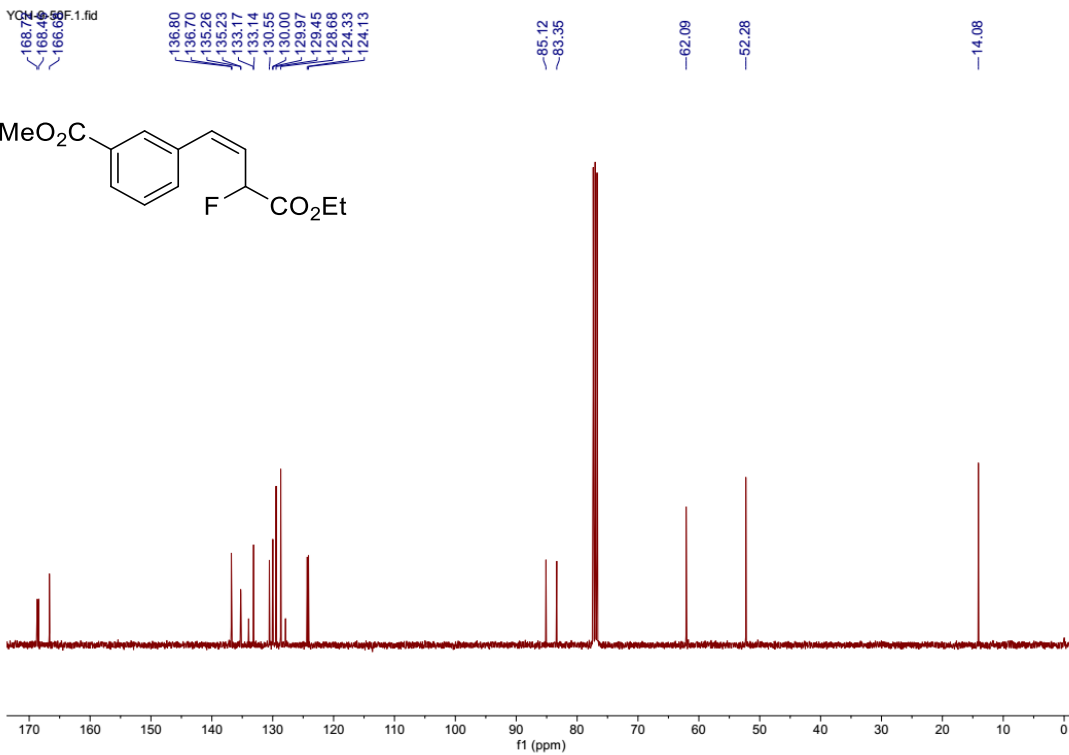

<sup>1</sup>H NMR (400 MHz, CDCl<sub>3</sub>) spectrum of compound **27**

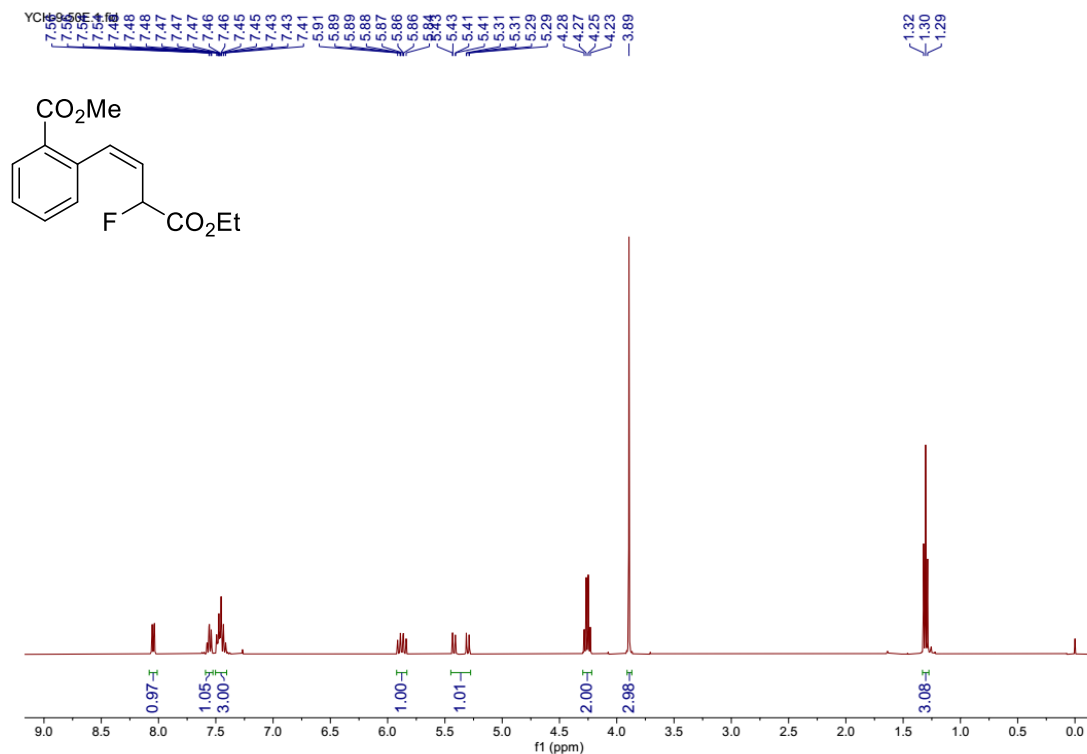

<sup>19</sup>F NMR (376 MHz, Chloroform-*d*) spectrum of compound **27**

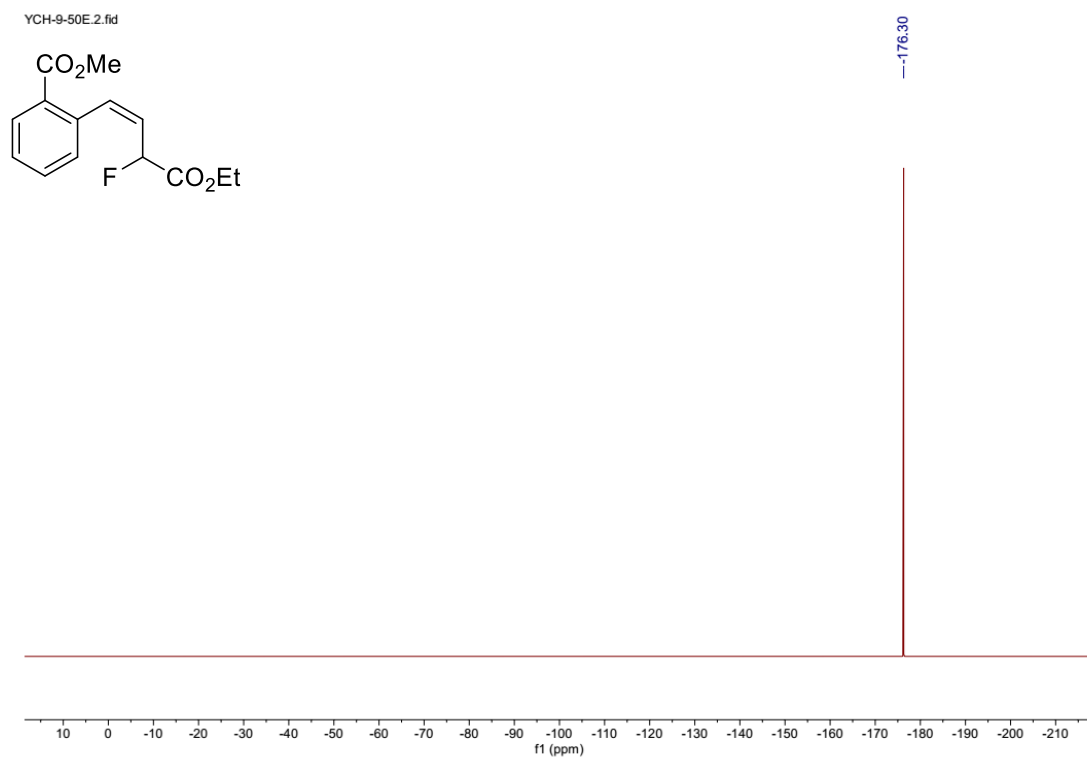



$^{13}\text{C}$  NMR (101 MHz, Chloroform-*d*) spectrum of compound **27**

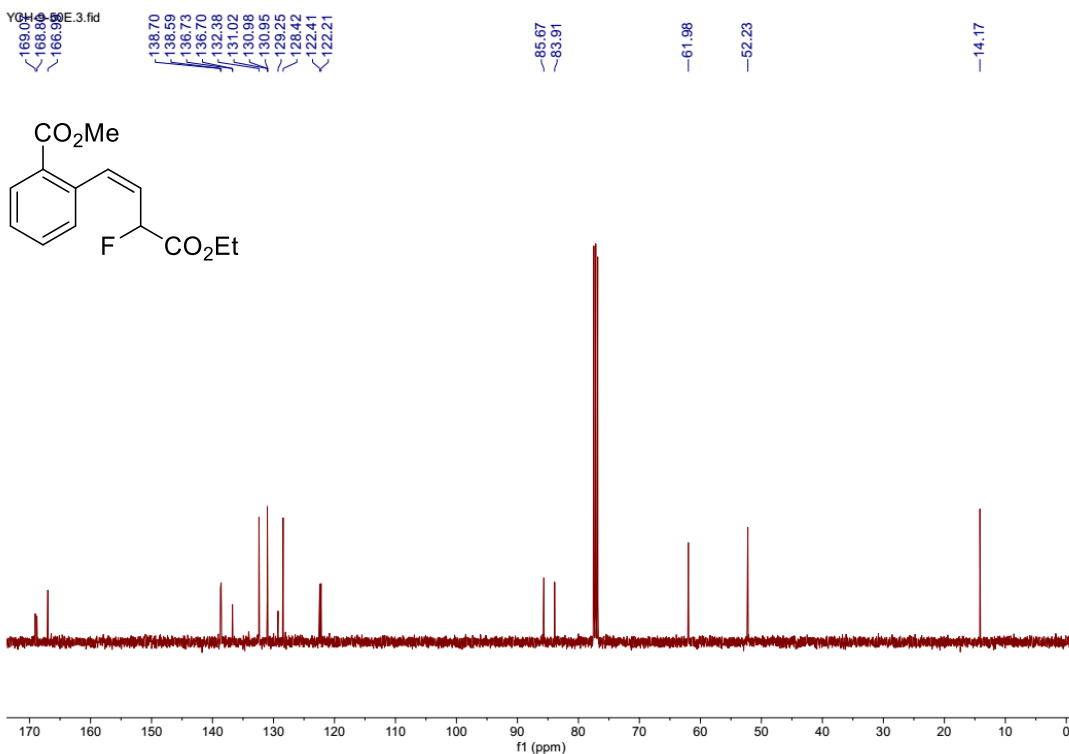

$^1\text{H}$  NMR (400 MHz,  $\text{CDCl}_3$ ) spectrum of compound **28**

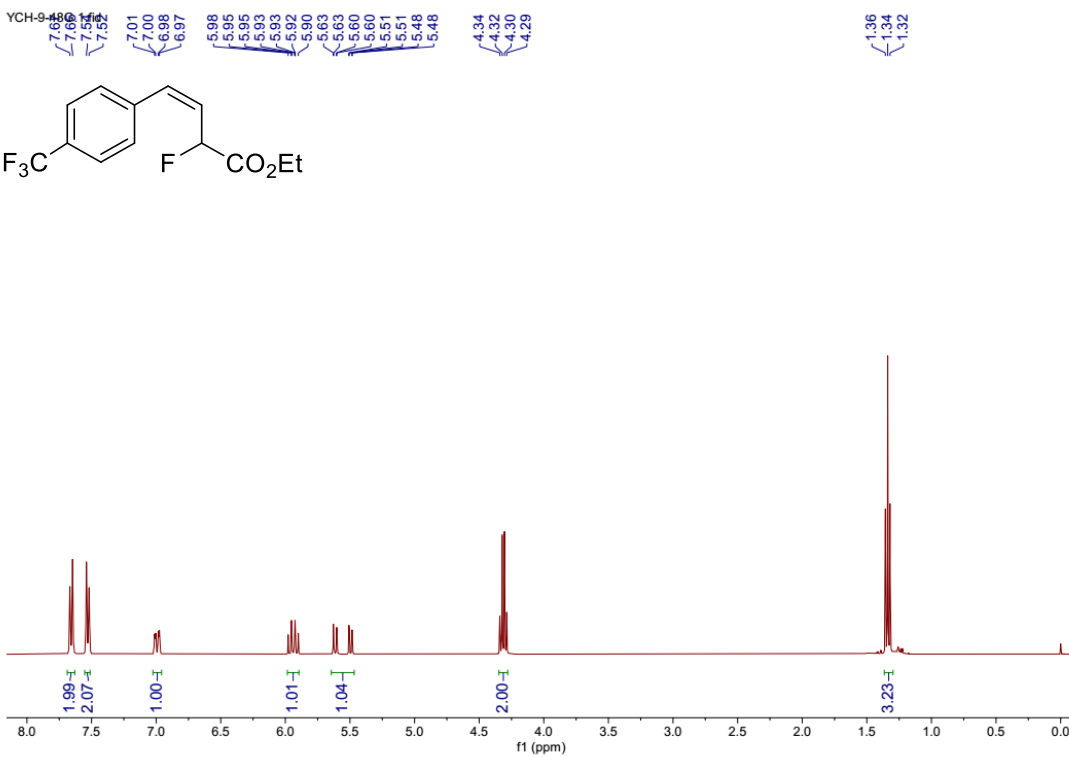

<sup>19</sup>F NMR (376 MHz, Chloroform-*d*) spectrum of compound **28**

YCH-9-48G.2.fid

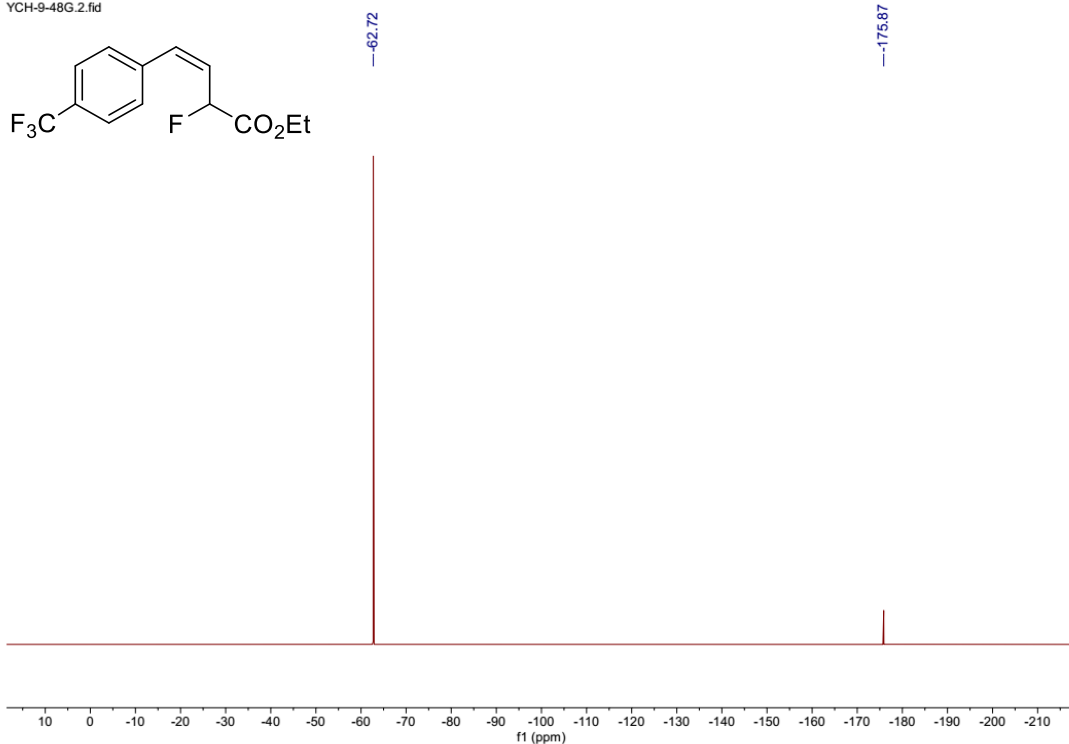

<sup>13</sup>C NMR (101 MHz, Chloroform-*d*) spectrum of compound **28**

YCH-9-48G.3.fid

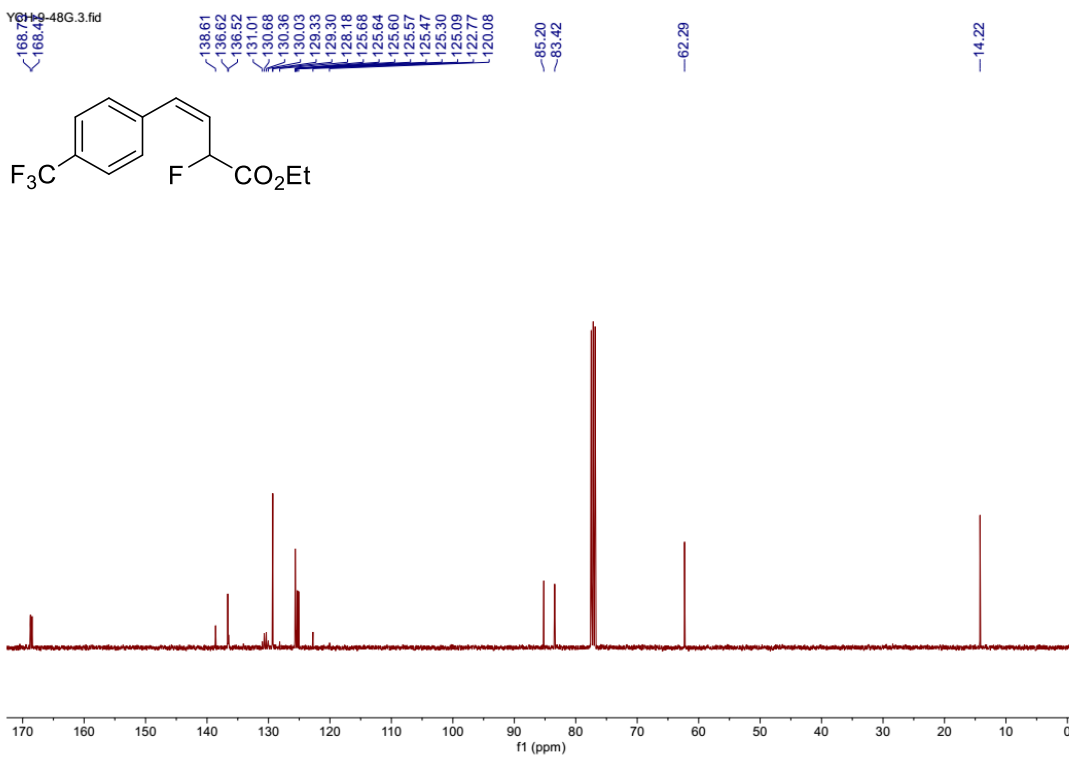

<sup>1</sup>H NMR (400 MHz, CDCl<sub>3</sub>) spectrum of compound **29**

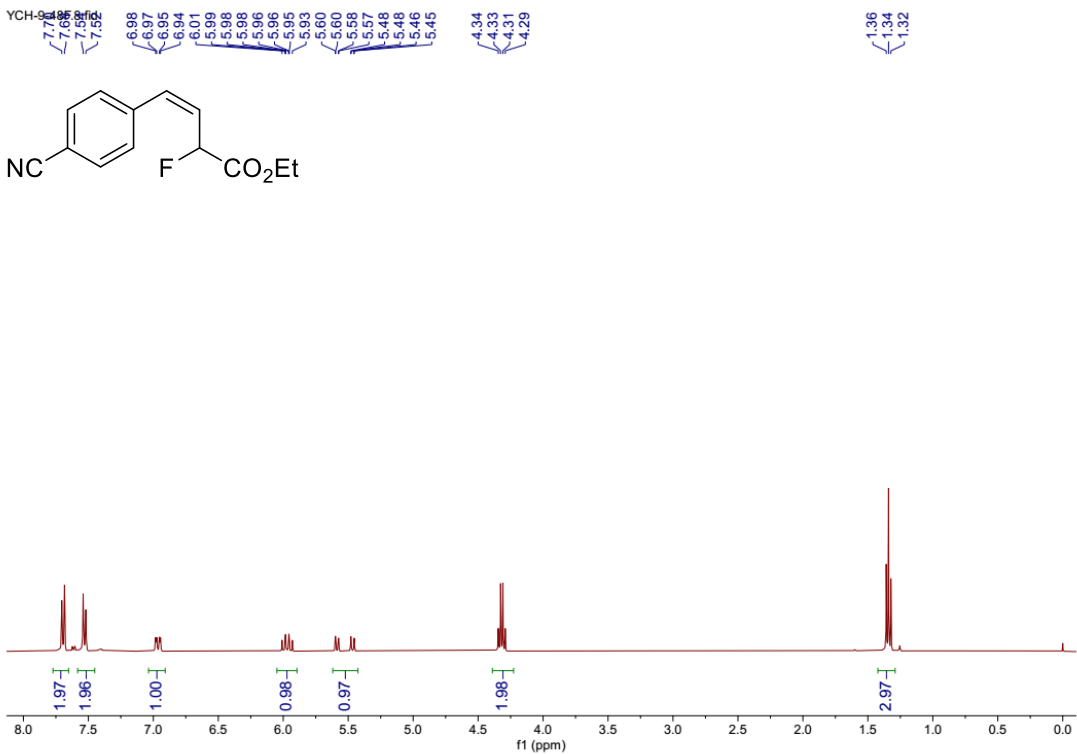

<sup>19</sup>F NMR (376 MHz, Chloroform-*d*) spectrum of compound **29**

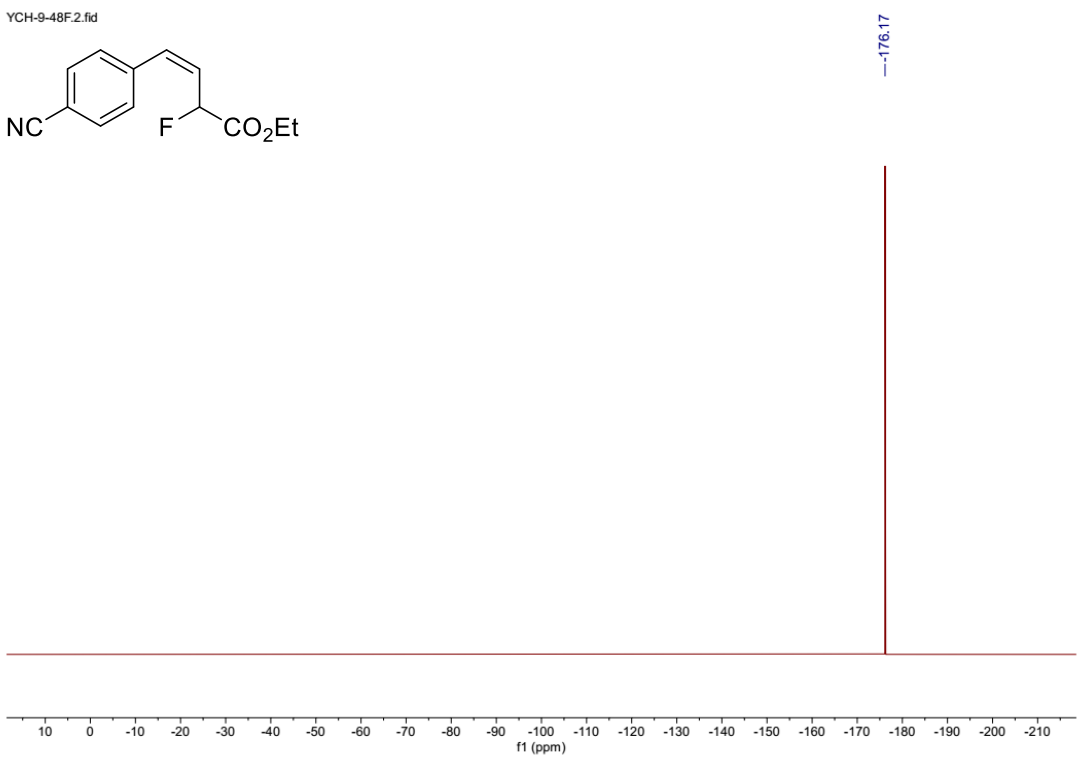

$^{13}\text{C}$  NMR (101 MHz, Chloroform-*d*) spectrum of compound **29**

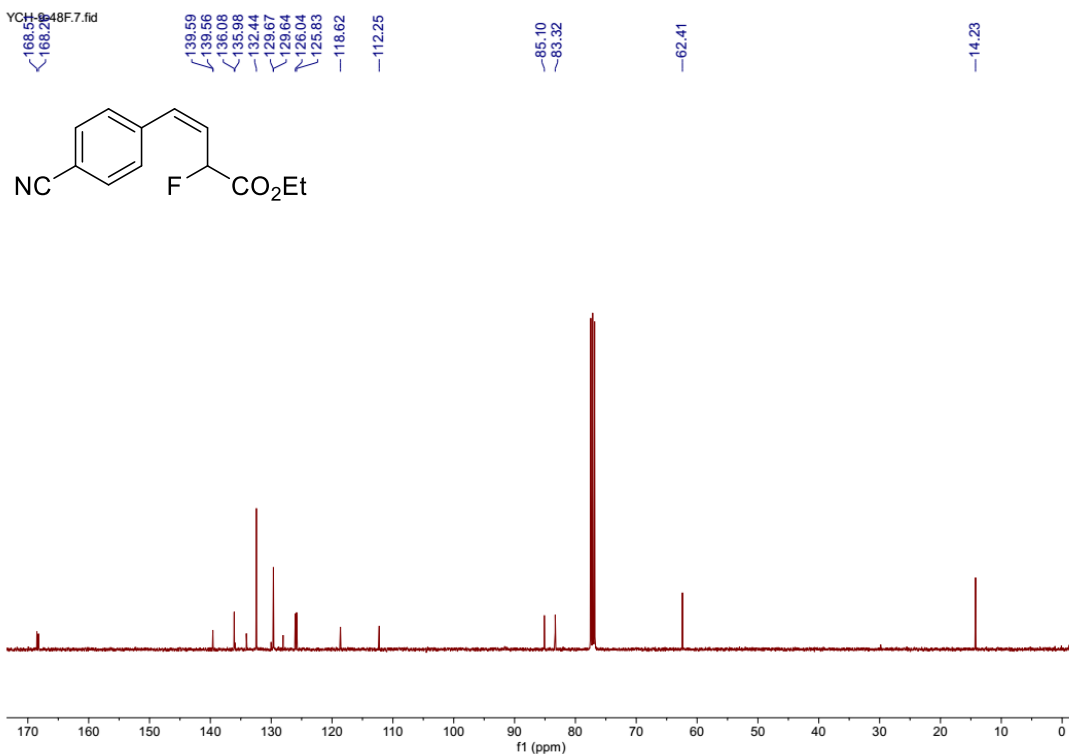

$^1\text{H}$  NMR (400 MHz,  $\text{CDCl}_3$ ) spectrum of compound **30**

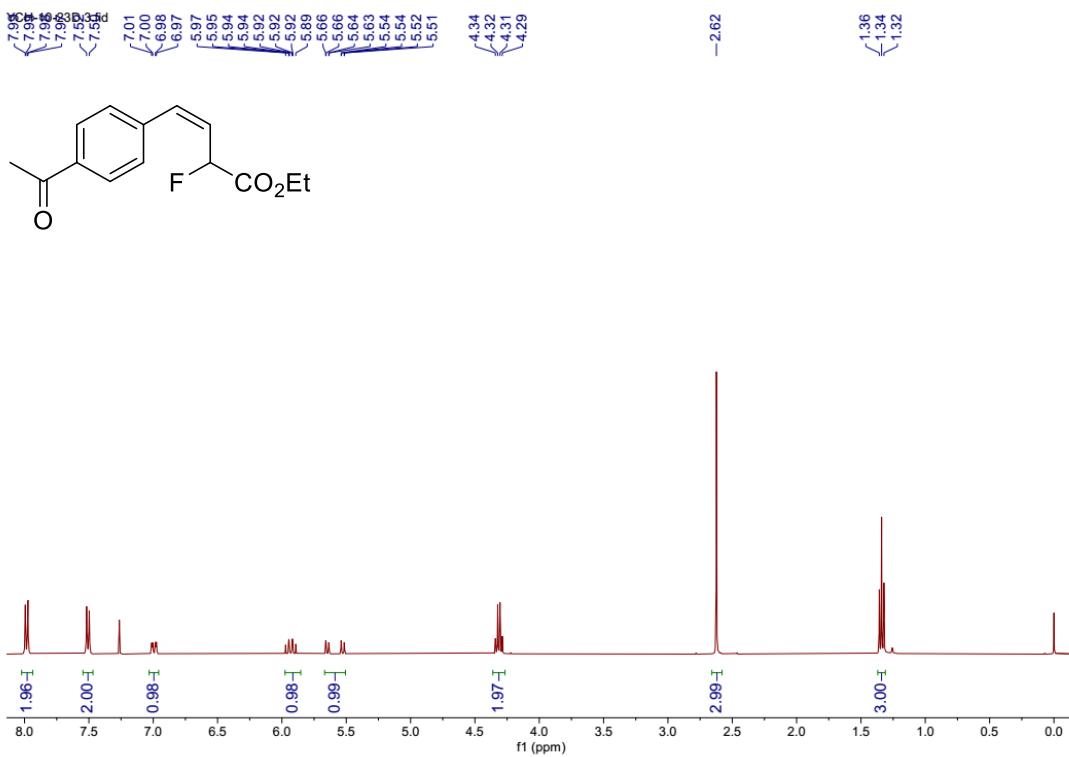

$^{19}\text{F}$  NMR (376 MHz, Chloroform-*d*) spectrum of compound **30**

YCH-10-23D.4.fid

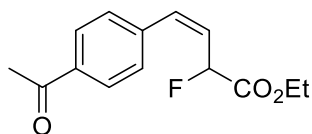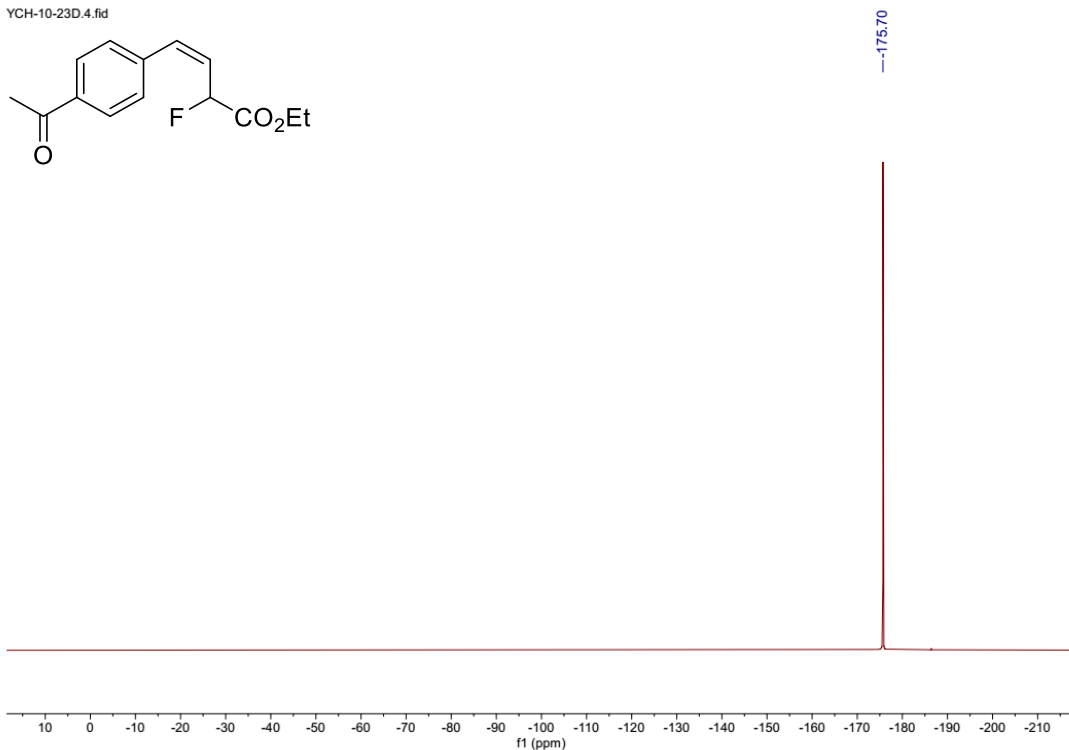

$^{13}\text{C}$  NMR (101 MHz, Chloroform-*d*) spectrum of compound **30**

YCH-10-23D.11.fid

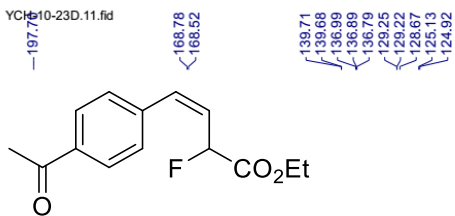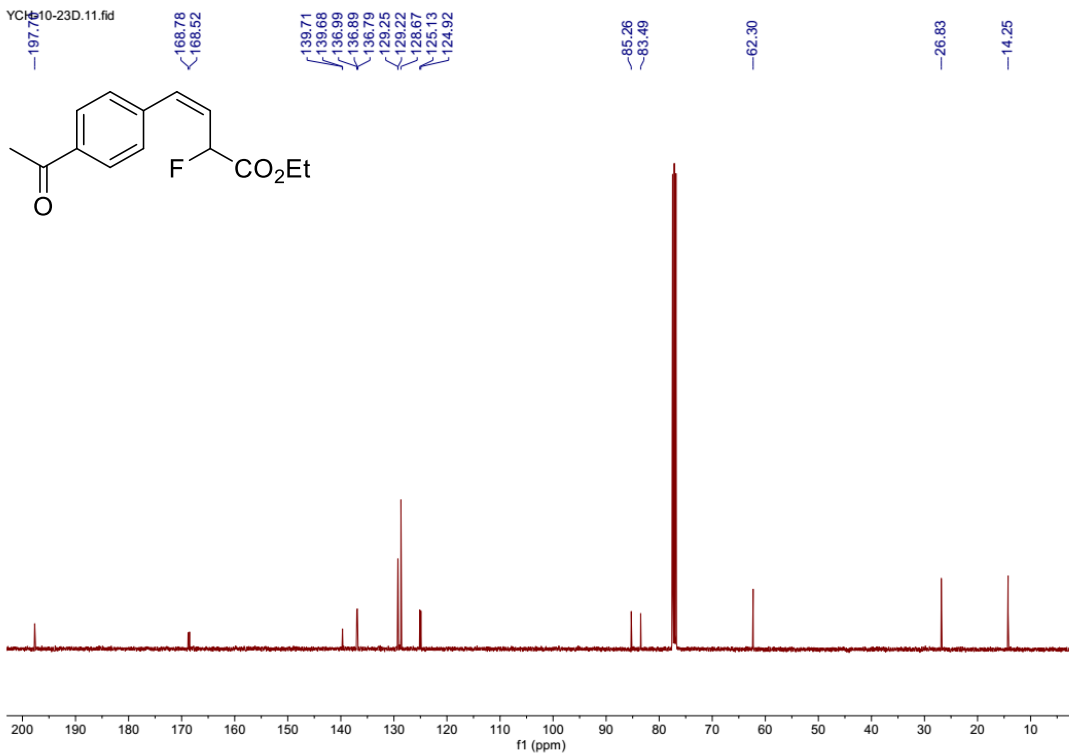



$^{13}\text{C}$  NMR (101 MHz, Chloroform-*d*) spectrum of compound **31**

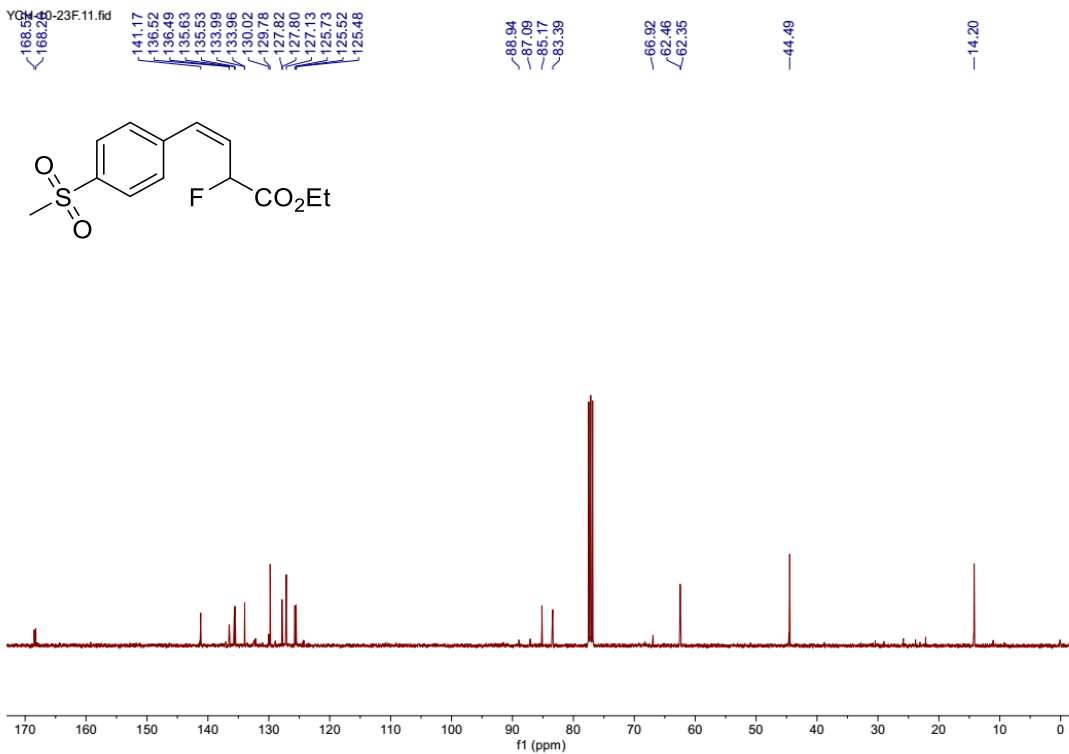

$^1\text{H}$  NMR (400 MHz,  $\text{CDCl}_3$ ) spectrum of compound **32**

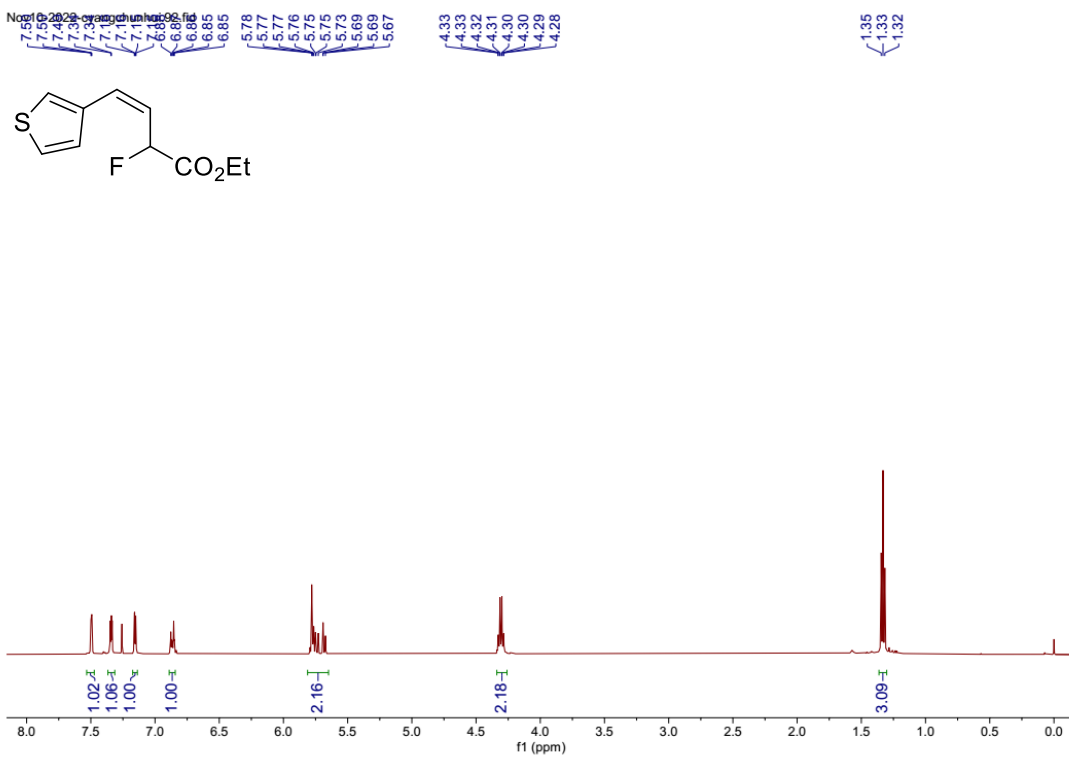

$^{19}\text{F}$  NMR (376 MHz, Chloroform-*d*) spectrum of compound **32**

YCH-9-60D.2.fid

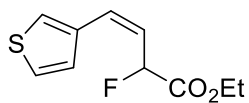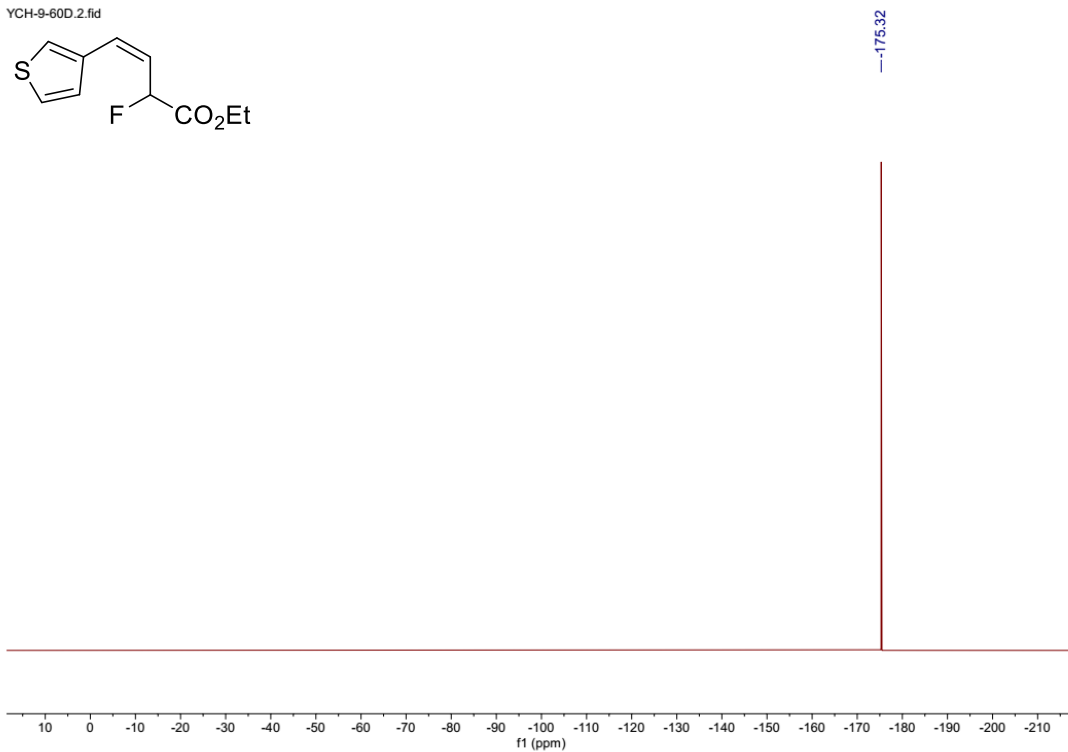

$^{13}\text{C}$  NMR (101 MHz, Chloroform-*d*) spectrum of compound **32**

No. 2022-cyangchunhui.91.fid

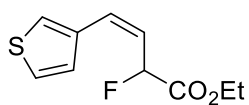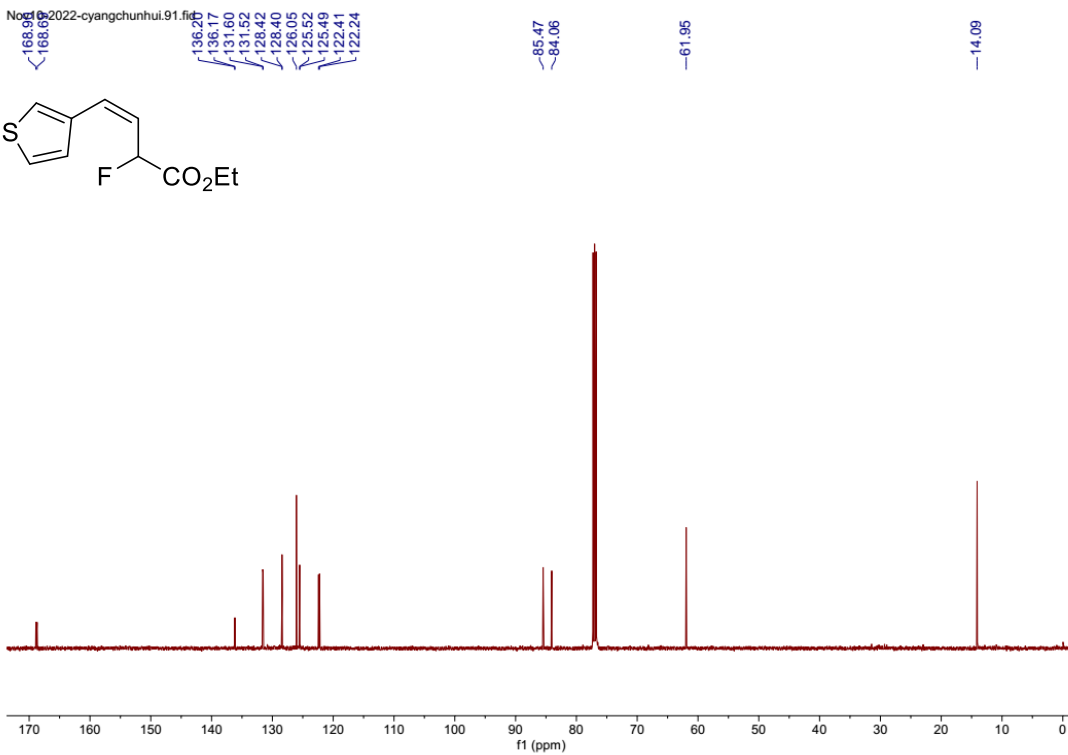





$^{13}\text{C}$  NMR (101 MHz, Chloroform-*d*) spectrum of compound **33**

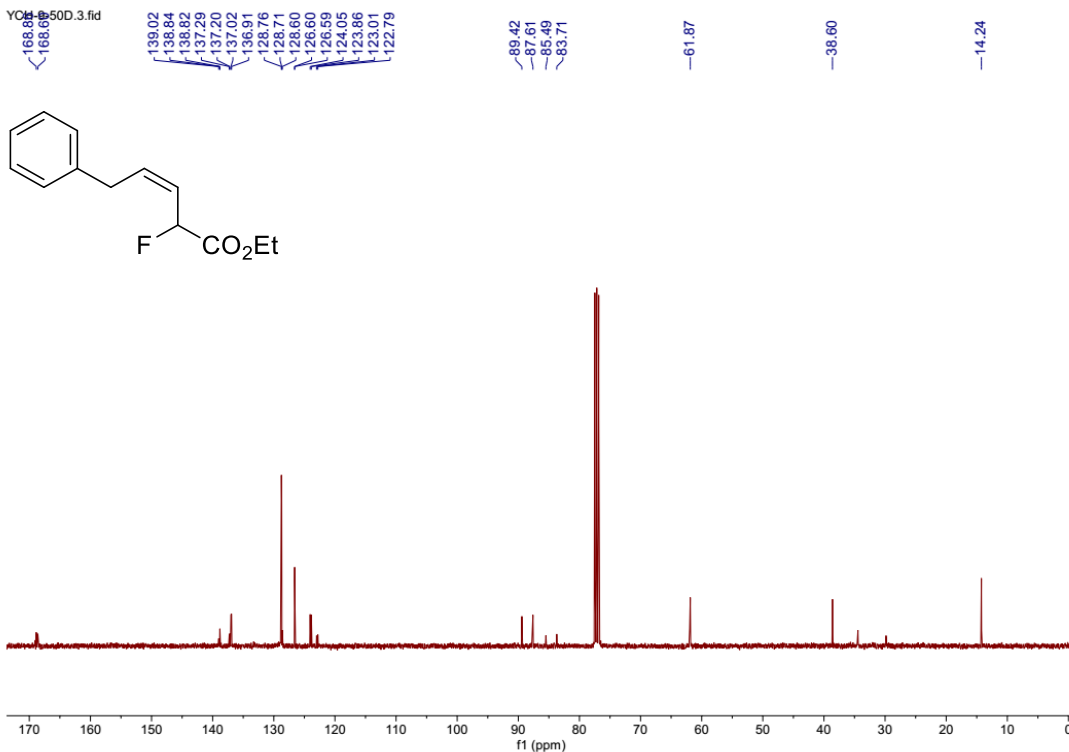

$^1\text{H}$  NMR (400 MHz,  $\text{CDCl}_3$ ) spectrum of compound **34**

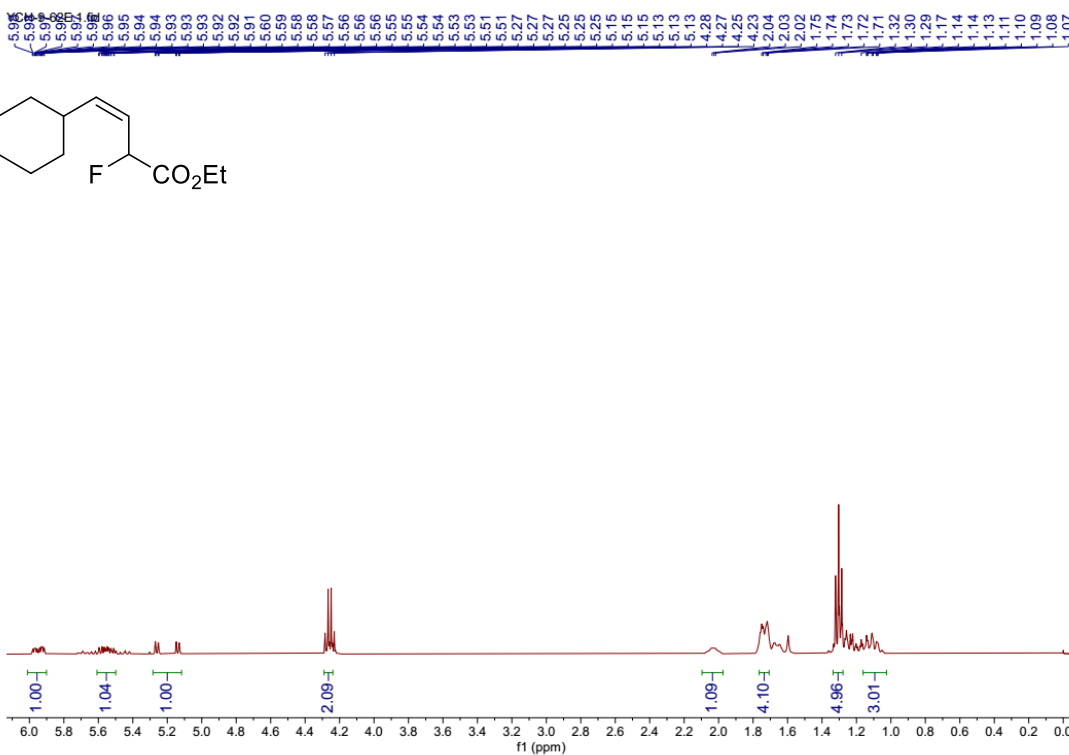

<sup>19</sup>F NMR (376 MHz, Chloroform-*d*) spectrum of compound **34**

YCH-9-62E.5.fid

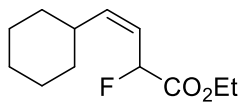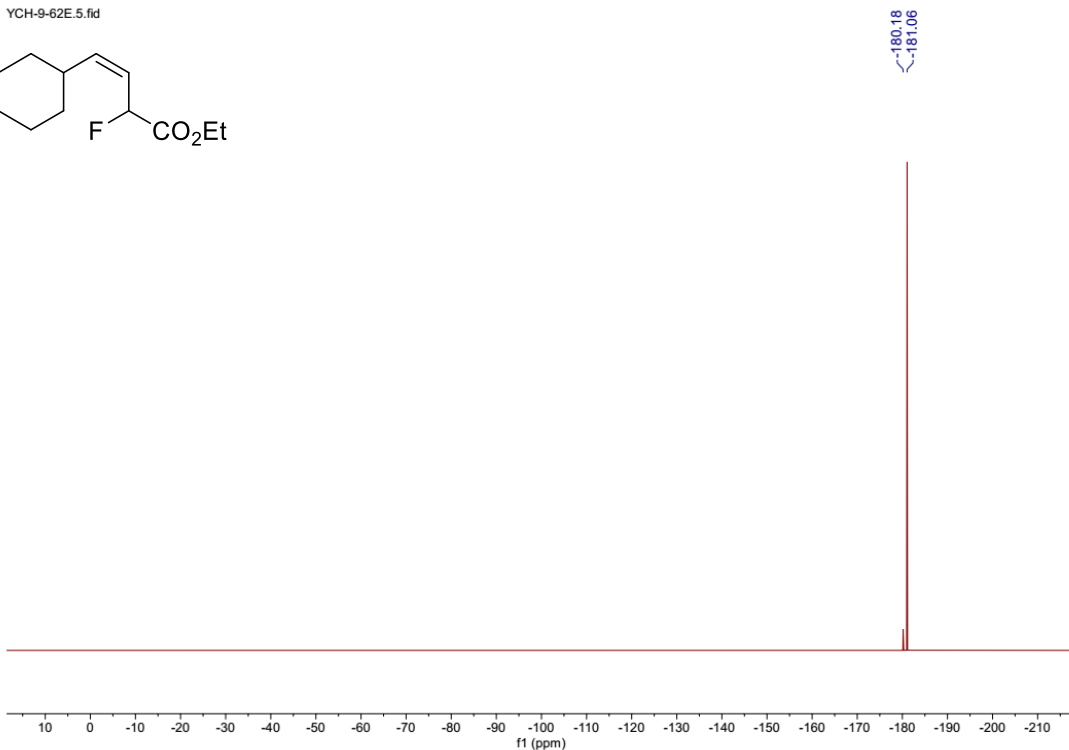

<sup>13</sup>C NMR (101 MHz, Chloroform-*d*) spectrum of compound **34**

YCH-9-62E.3.fid

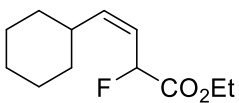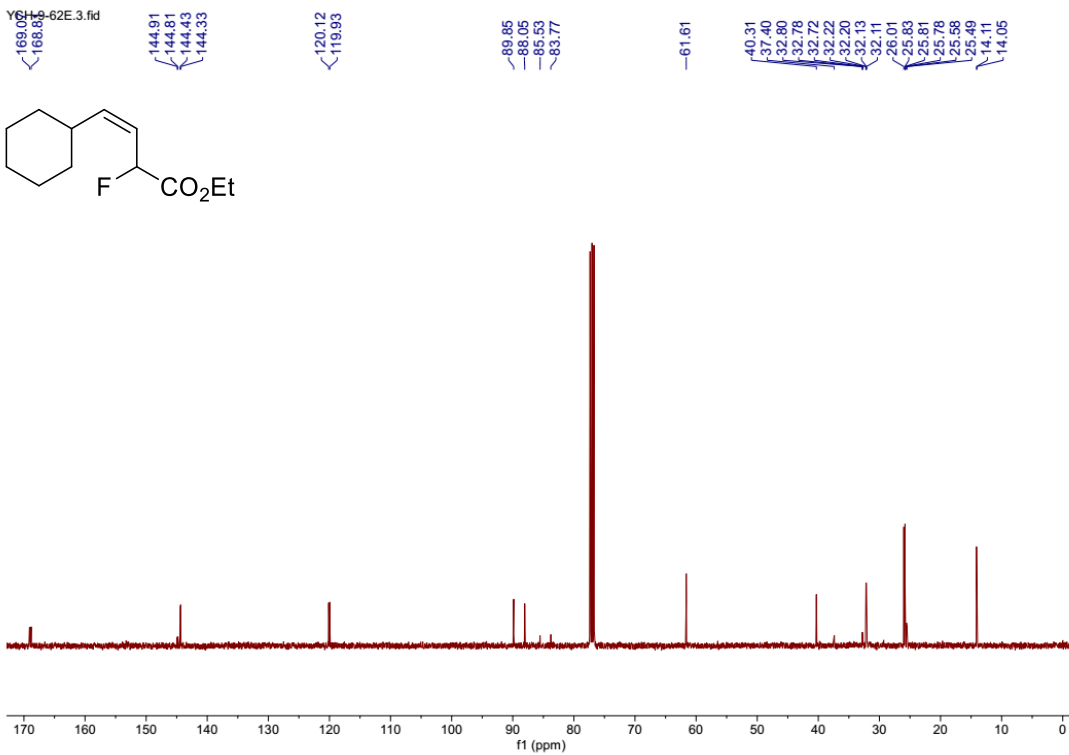

<sup>1</sup>H NMR (400 MHz, CDCl<sub>3</sub>) spectrum of compound **35**

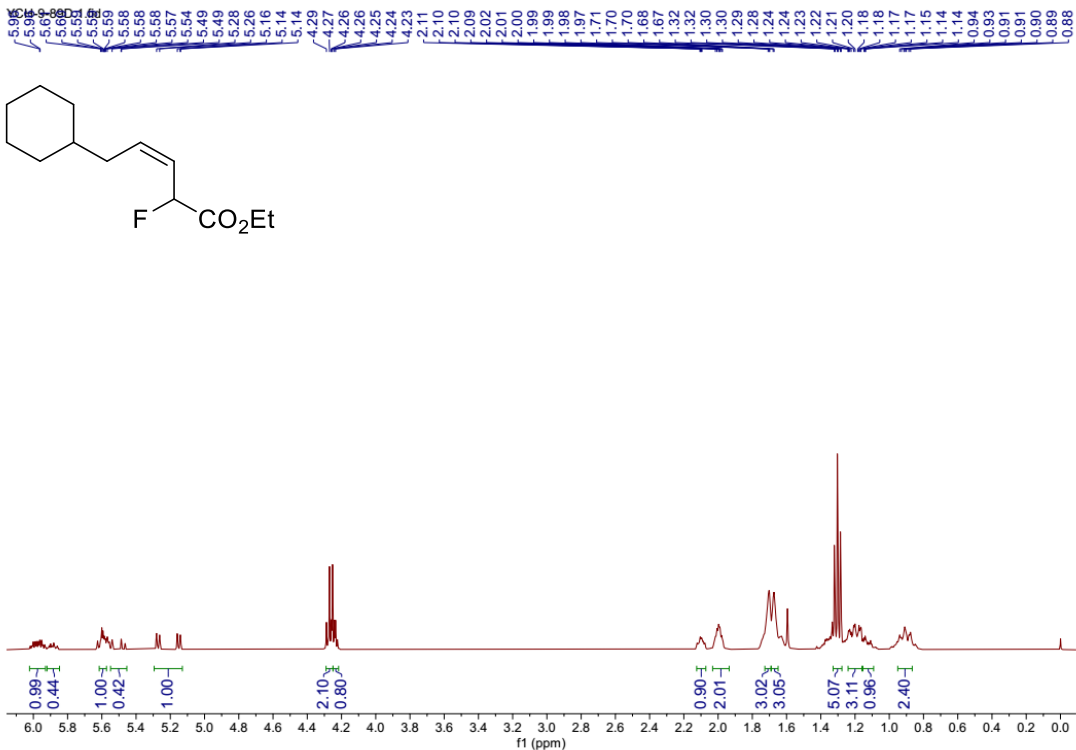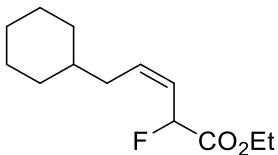

<sup>19</sup>F NMR (376 MHz, Chloroform-*d*) spectrum of compound **35**

YCH-9-89D.2.fid

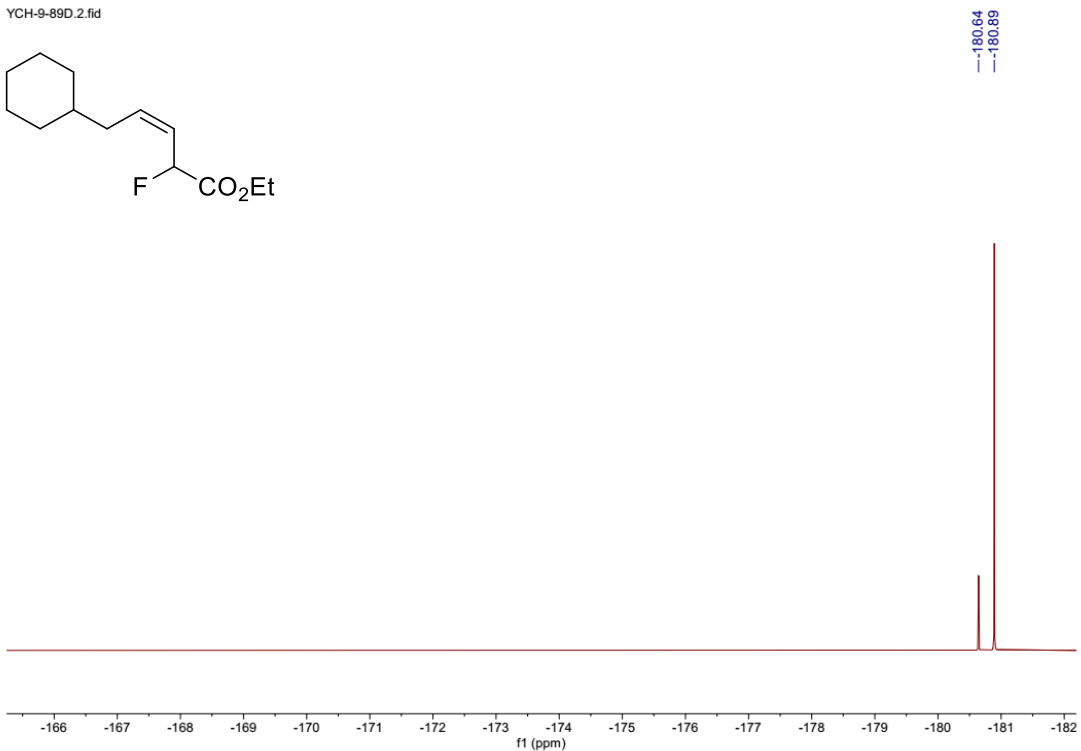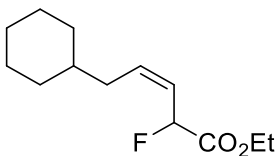

<sup>13</sup>C NMR (101 MHz, Chloroform-*d*) spectrum of compound **35**

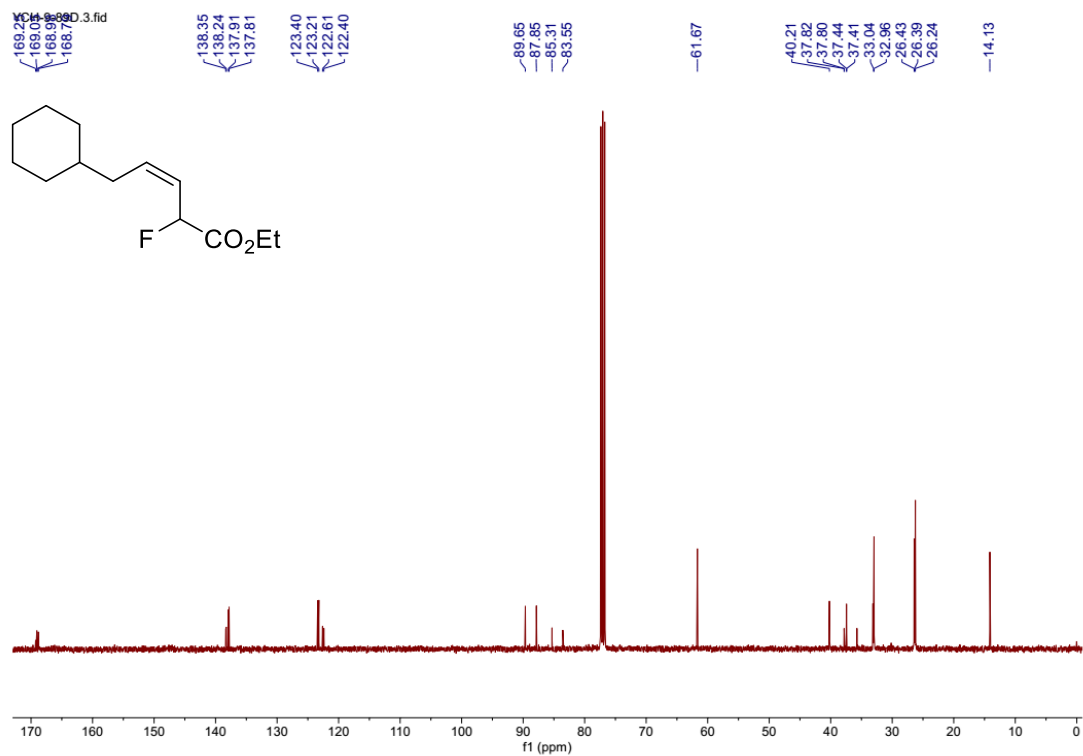

<sup>1</sup>H NMR (400 MHz, CDCl<sub>3</sub>) spectrum of compound **36**

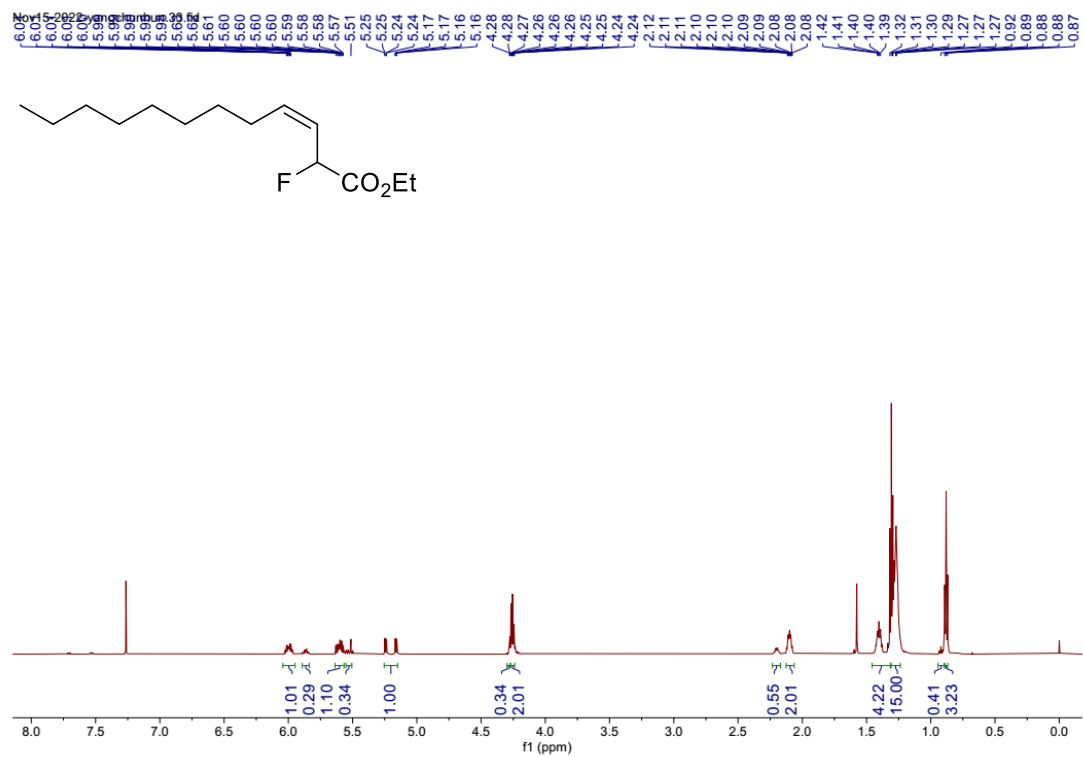

$^{19}\text{F}$  NMR (376 MHz, Chloroform-*d*) spectrum of compound **36**

Nov15-2022-yangchunhun.35.fid

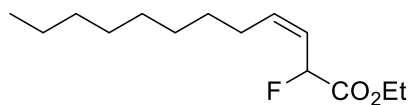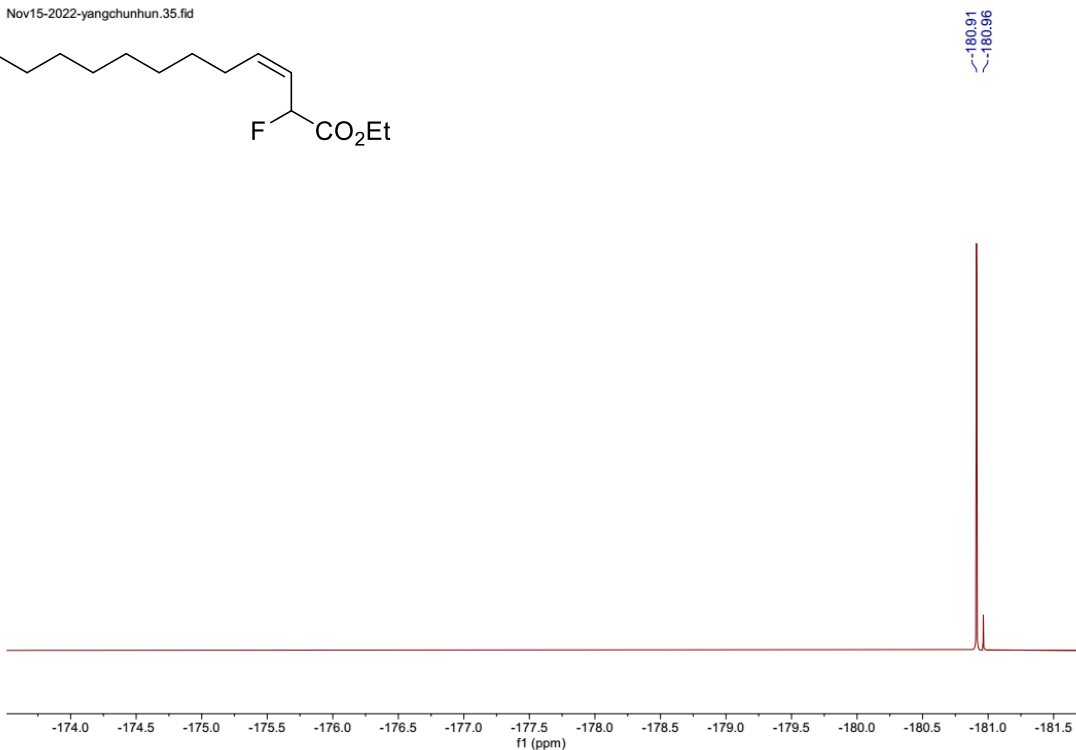

$^{13}\text{C}$  NMR (101 MHz, Chloroform-*d*) spectrum of compound **36**

Nov15-2022-yangchunhun.34.fid

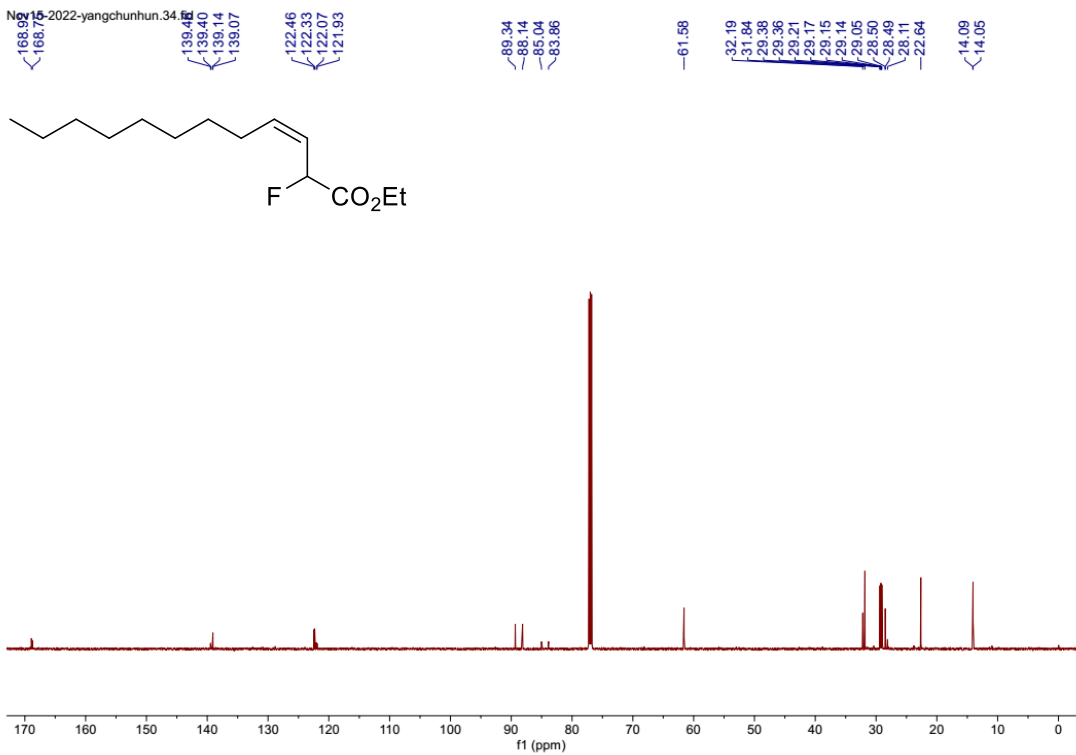

<sup>1</sup>H NMR (400 MHz, CDCl<sub>3</sub>) spectrum of compound **37**

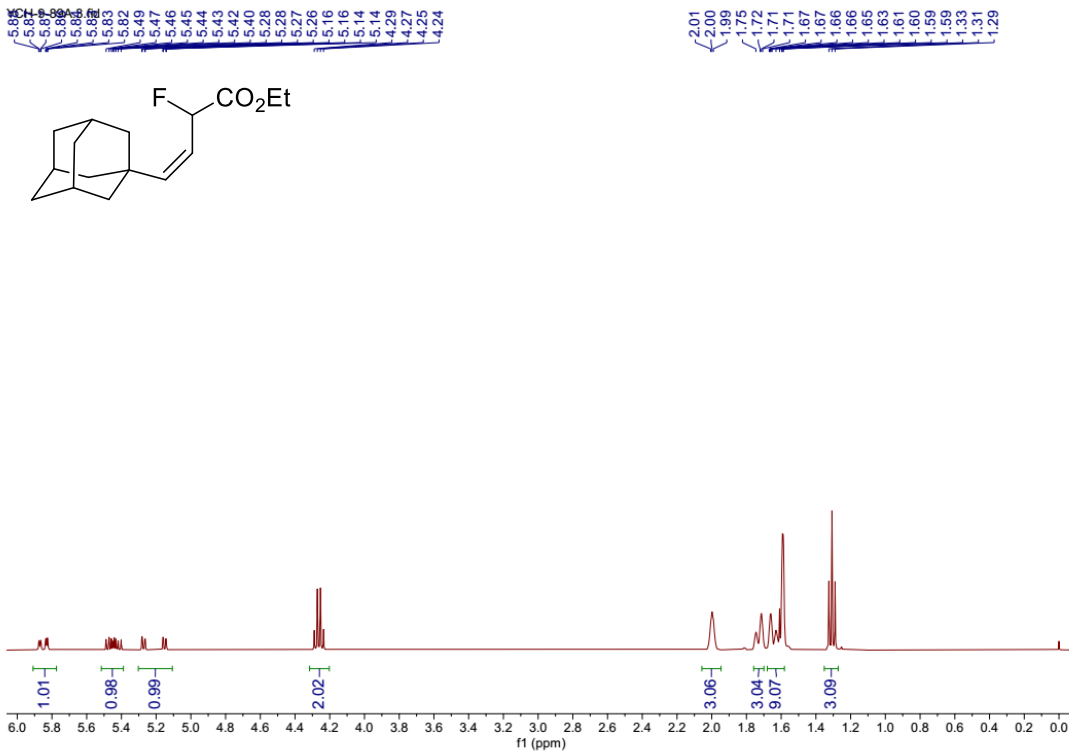

<sup>19</sup>F NMR (376 MHz, Chloroform-*d*) spectrum of compound **37**

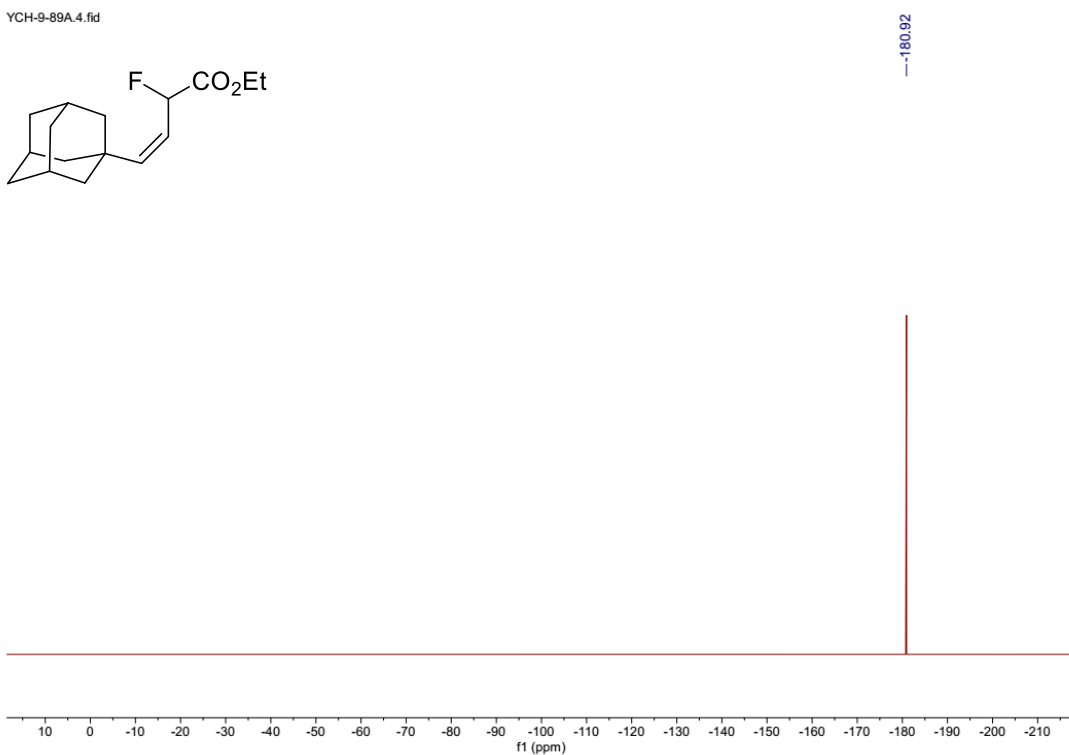

$^{13}\text{C}$  NMR (101 MHz, Chloroform-*d*) spectrum of compound **37**

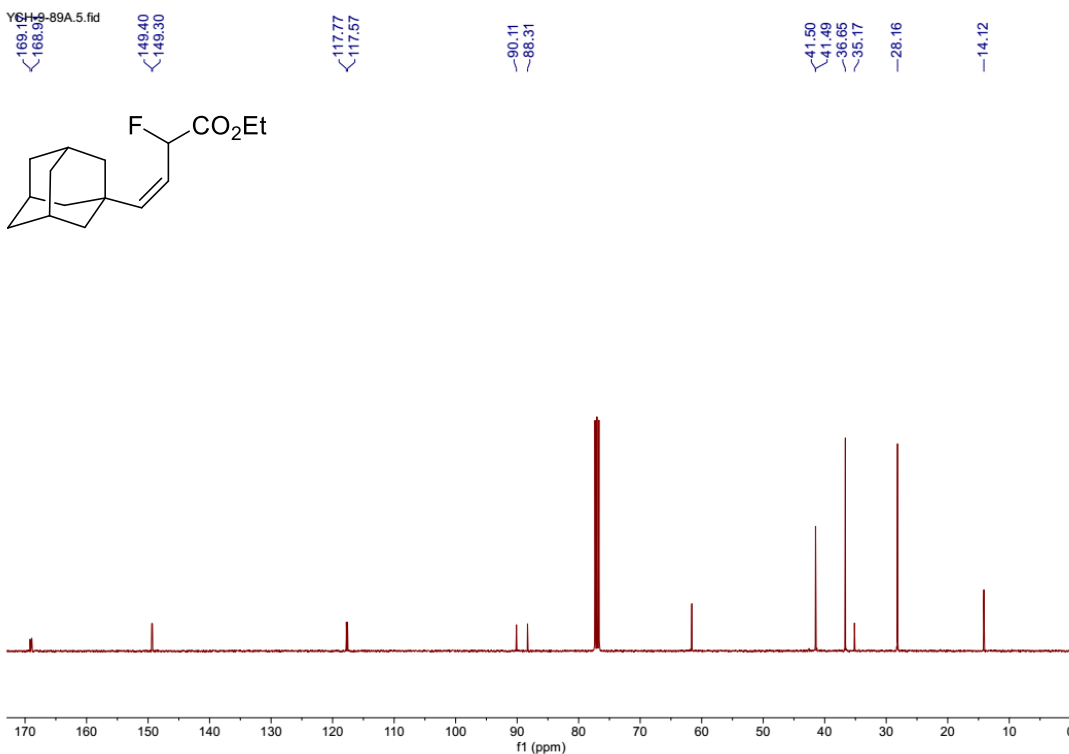

$^1\text{H}$  NMR (400 MHz,  $\text{CDCl}_3$ ) spectrum of compound **38**

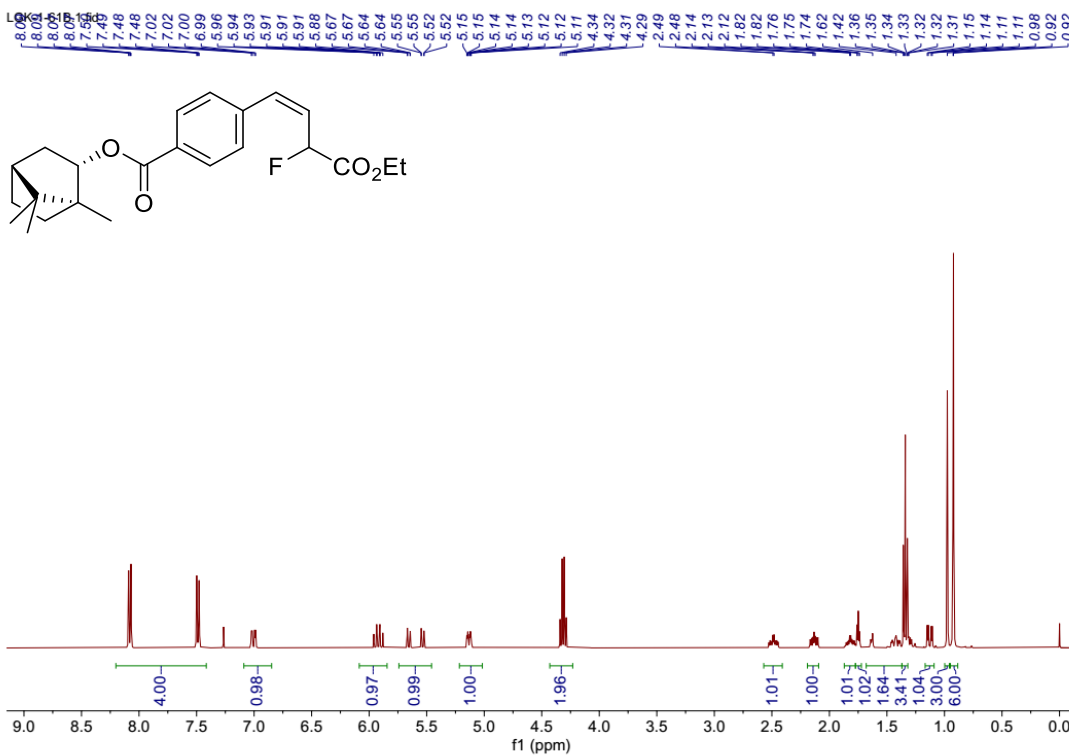



$^{19}\text{F}$  NMR (376 MHz, Chloroform-*d*) spectrum of compound **38**

LGK-1-61B.2.fid

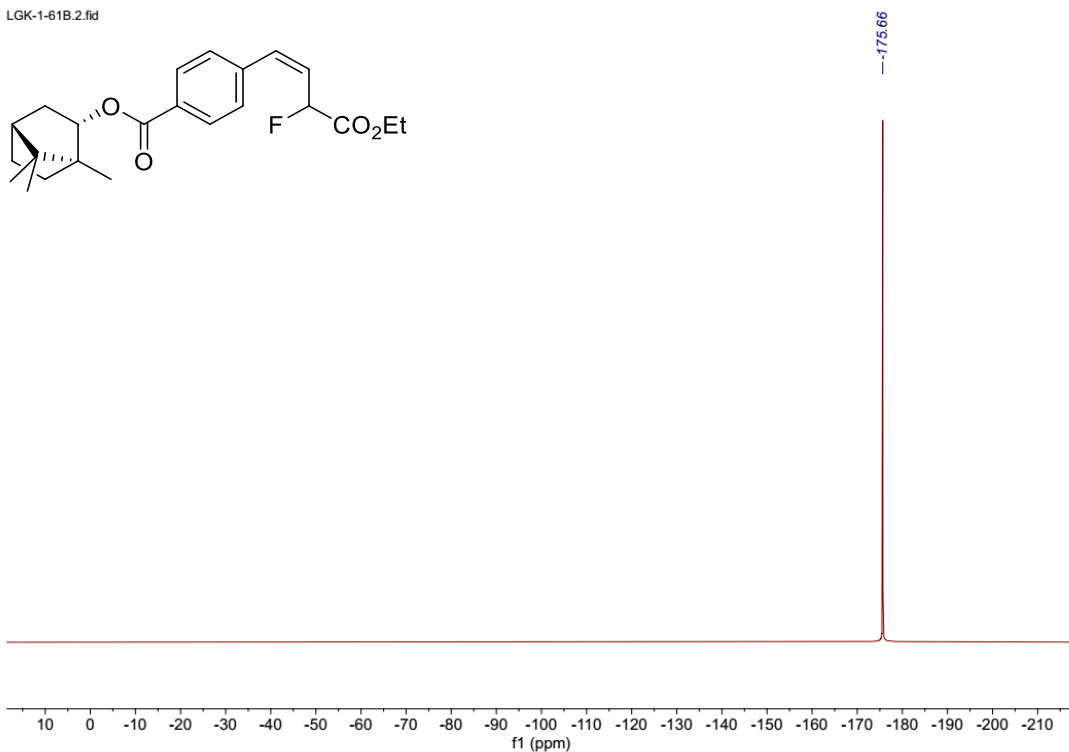

$^{13}\text{C}$  NMR (101 MHz, Chloroform-*d*) spectrum of compound **38**

LGK-1-61B.3.fid

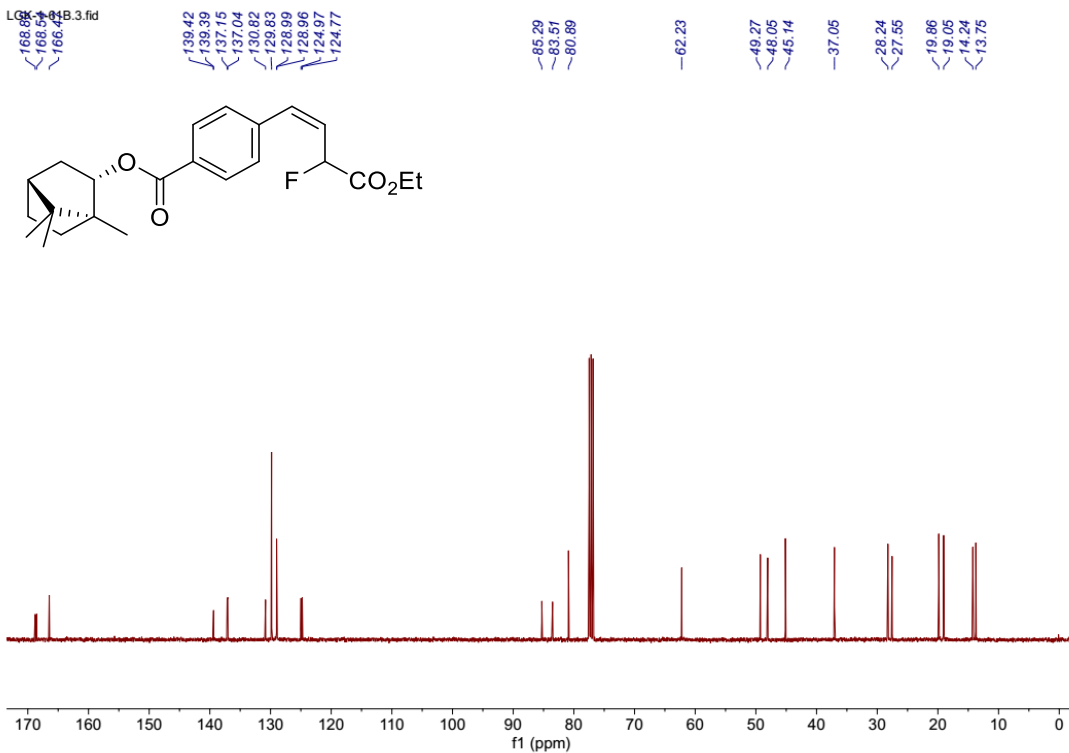

<sup>1</sup>H NMR (400 MHz, CDCl<sub>3</sub>) spectrum of compound **39**

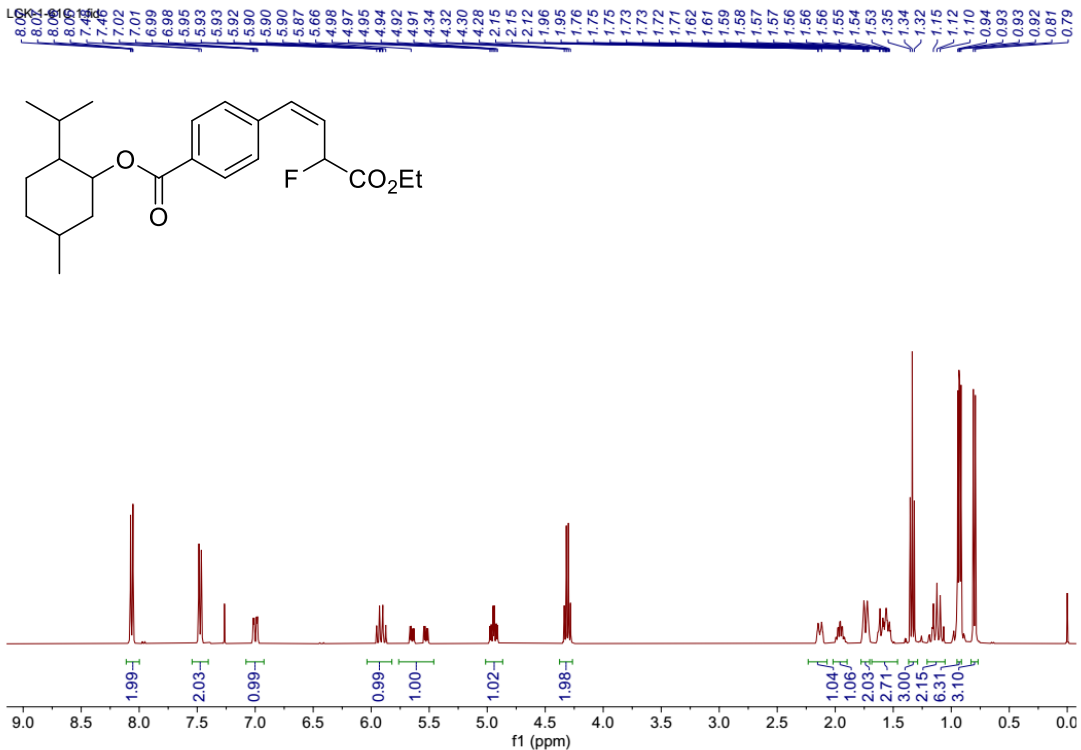

<sup>19</sup>F NMR (376 MHz, Chloroform-*d*) spectrum of compound **39**

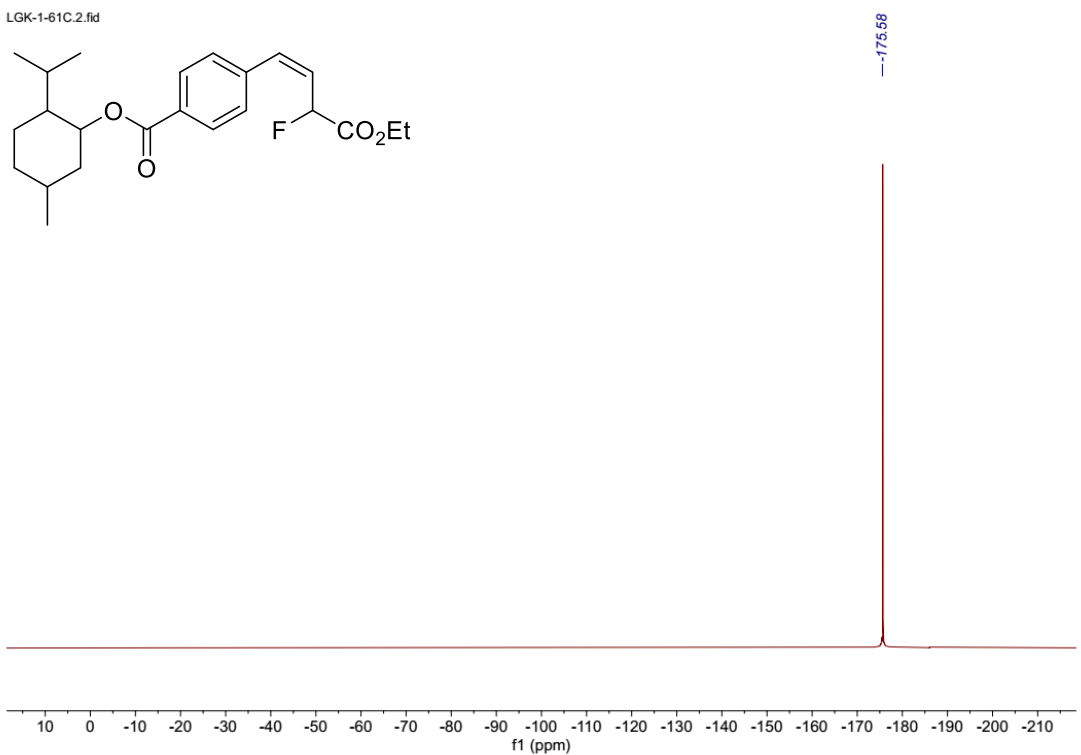

$^{13}\text{C}$  NMR (101 MHz, Chloroform-*d*) spectrum of compound **39**

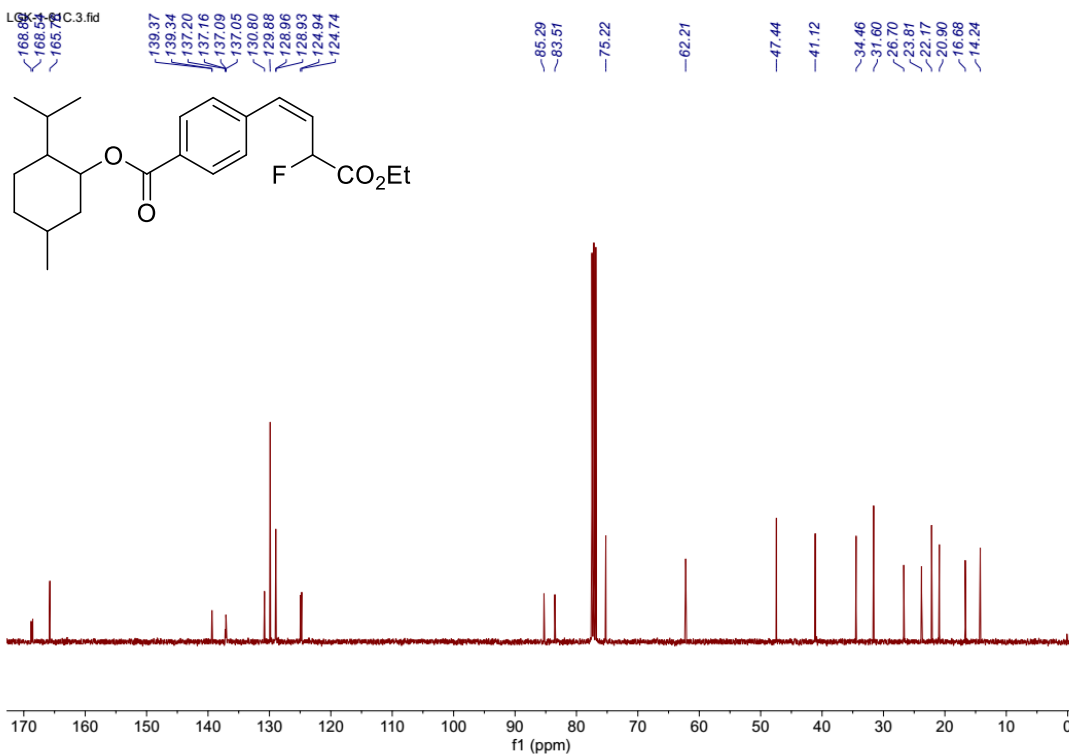

$^1\text{H}$  NMR (400 MHz,  $\text{CDCl}_3$ ) spectrum of compound **40**

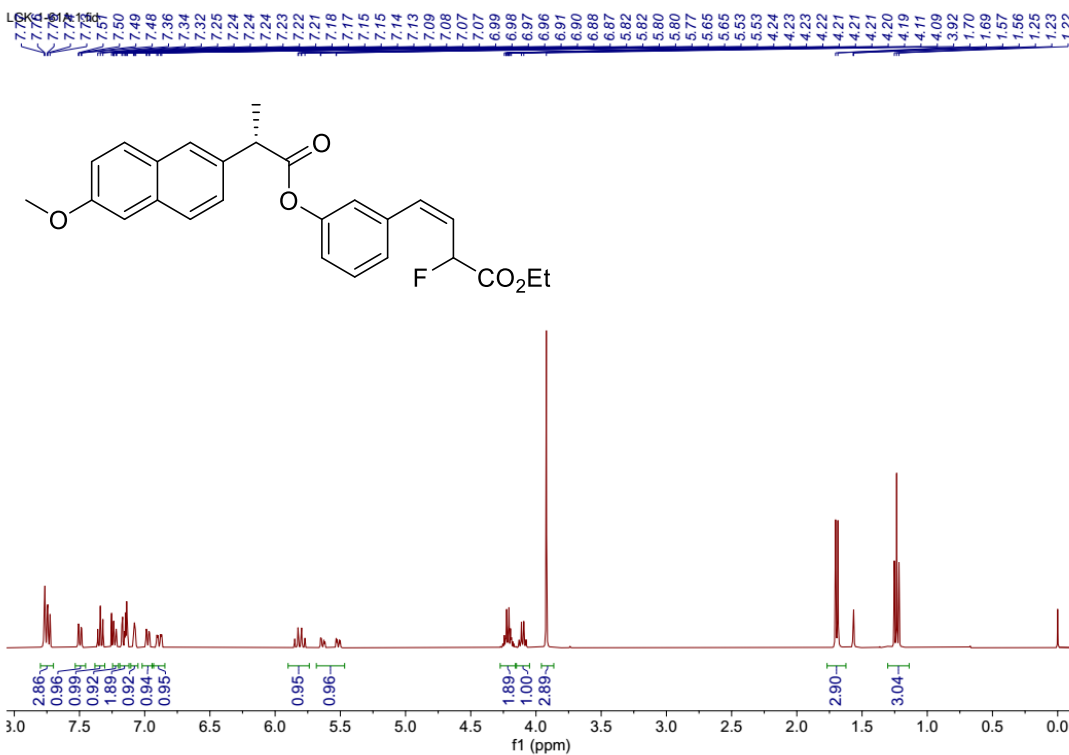

<sup>19</sup>F NMR (376 MHz, Chloroform-*d*) spectrum of compound **40**

LGK-1-61A.2.fid

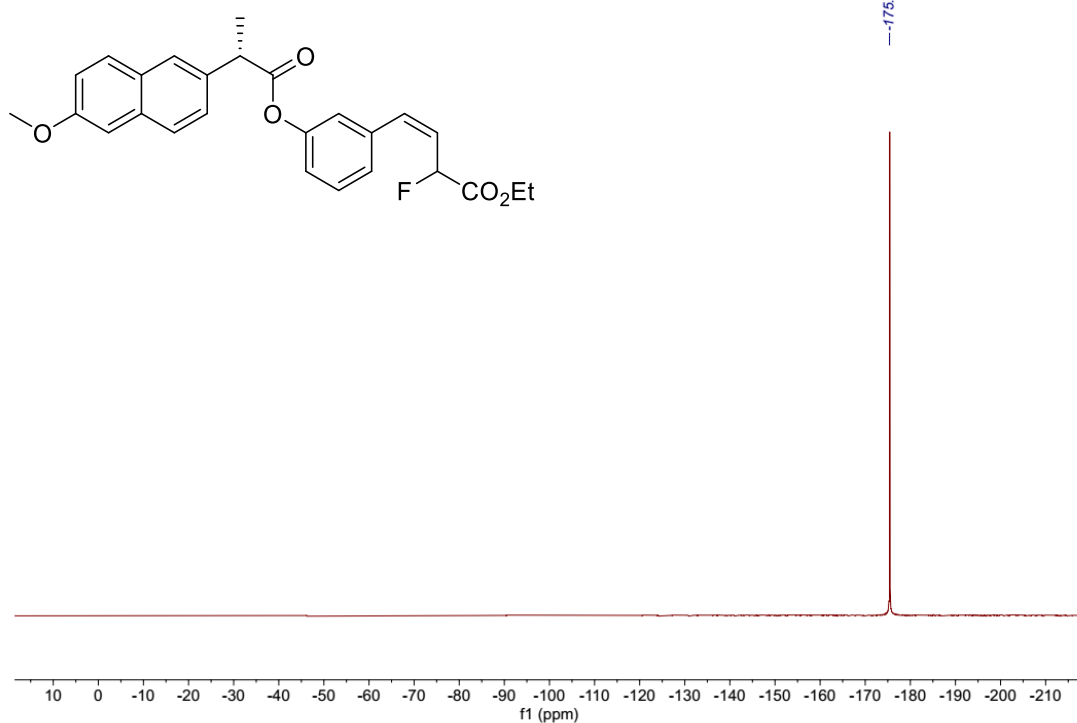

<sup>13</sup>C NMR (101 MHz, Chloroform-*d*) spectrum of compound **40**

LGK-1-61A.2.fid

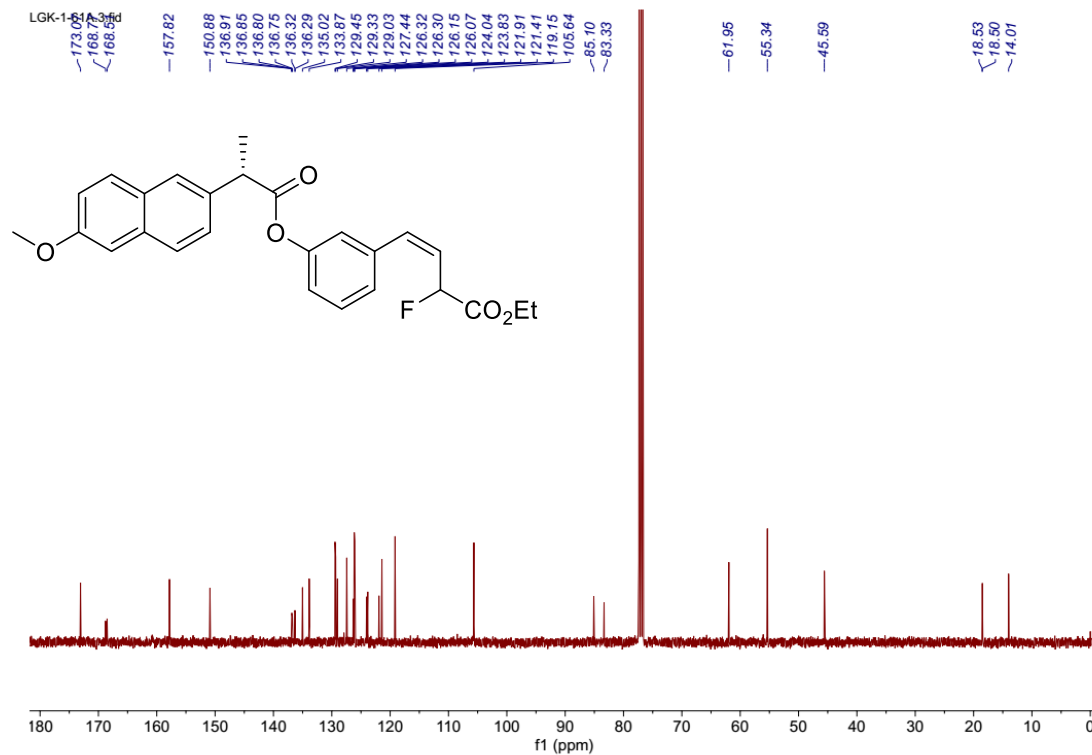

<sup>1</sup>H NMR (400 MHz, CDCl<sub>3</sub>) spectrum of compound **41**

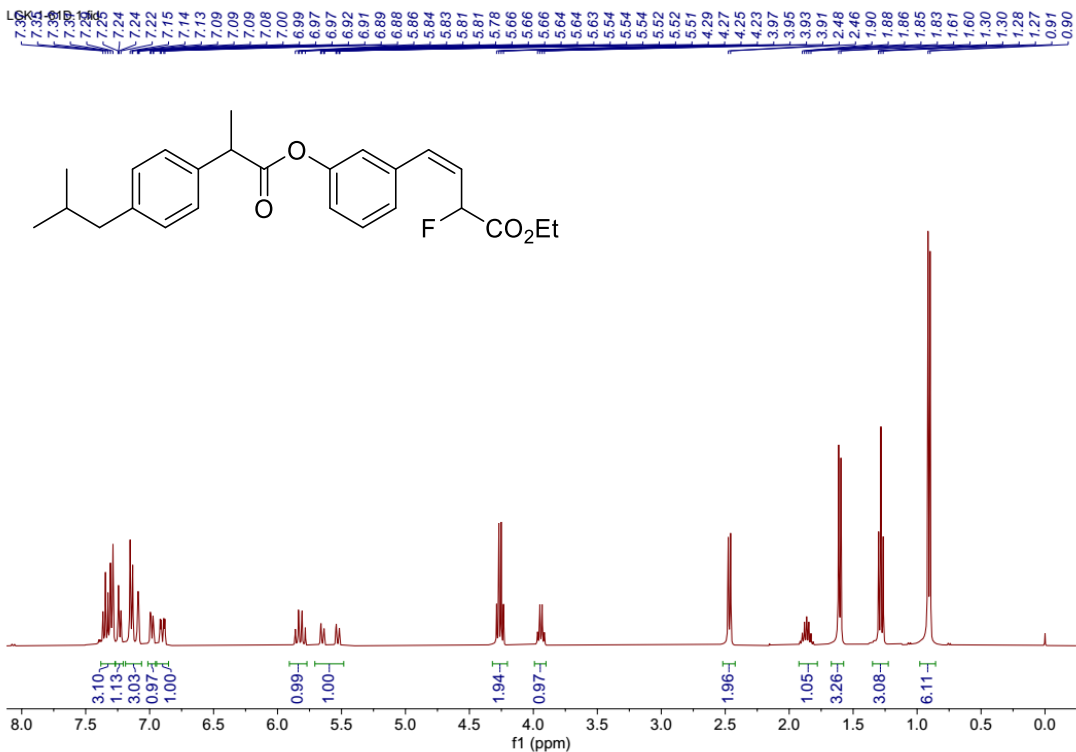

<sup>19</sup>F NMR (376 MHz, Chloroform-*d*) spectrum of compound **41**

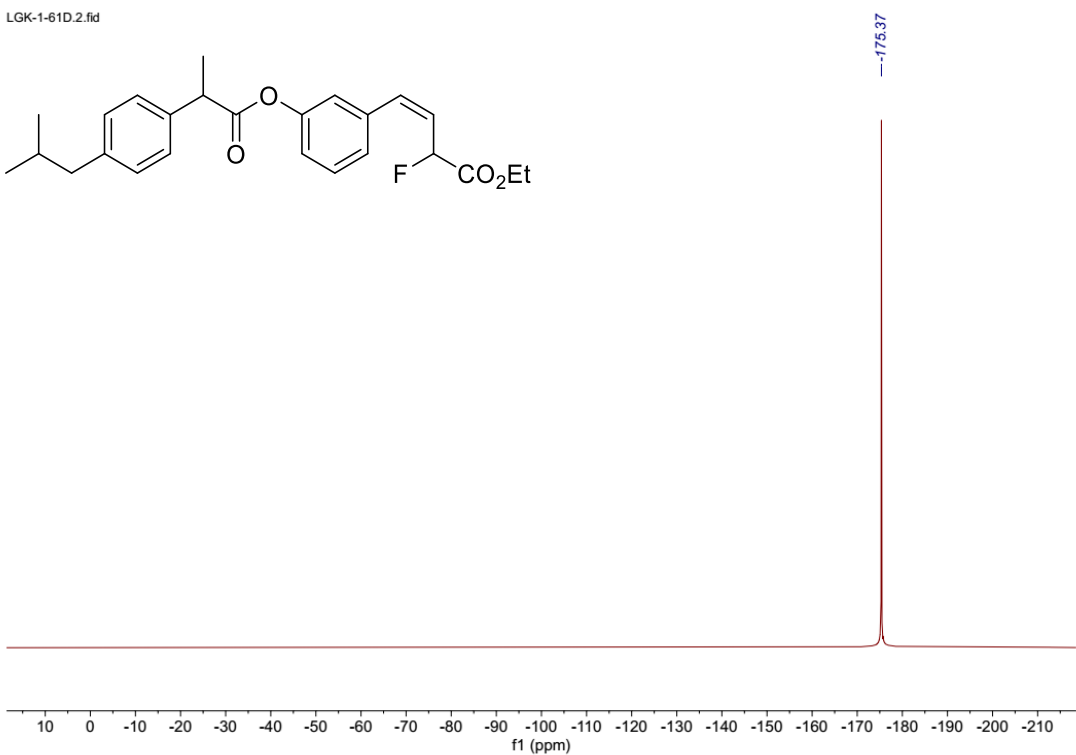

$^{13}\text{C}$  NMR (101 MHz, Chloroform-*d*) spectrum of compound **41**

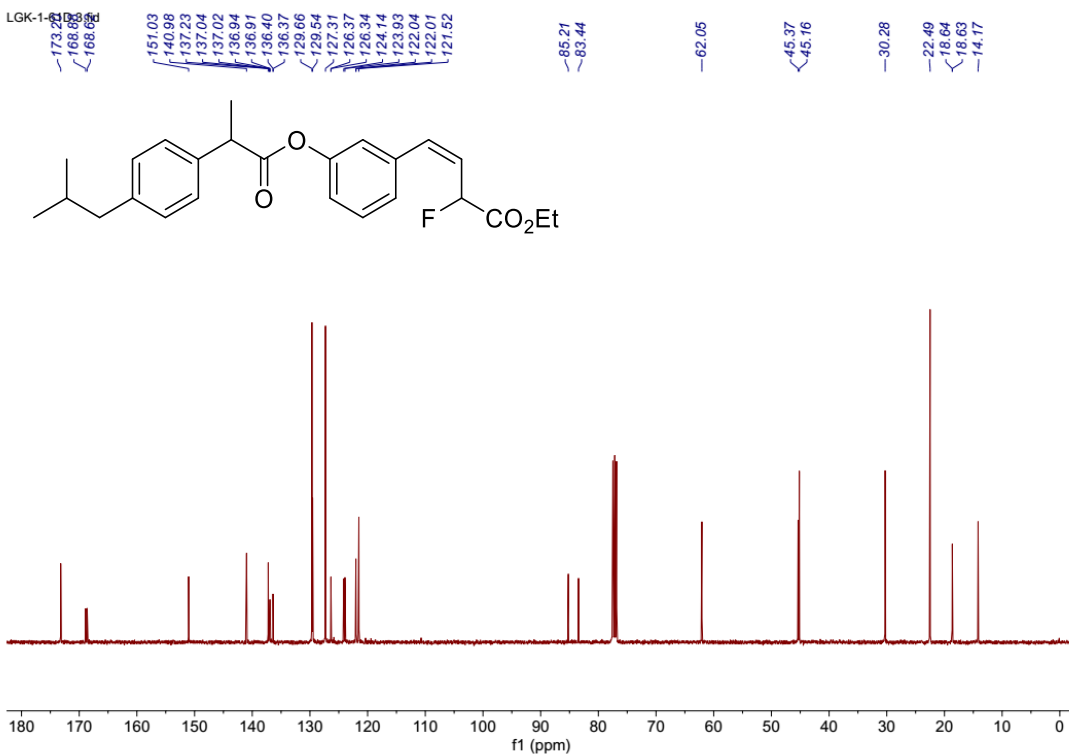

$^1\text{H}$  NMR (400 MHz,  $\text{CDCl}_3$ ) spectrum of compound **42**

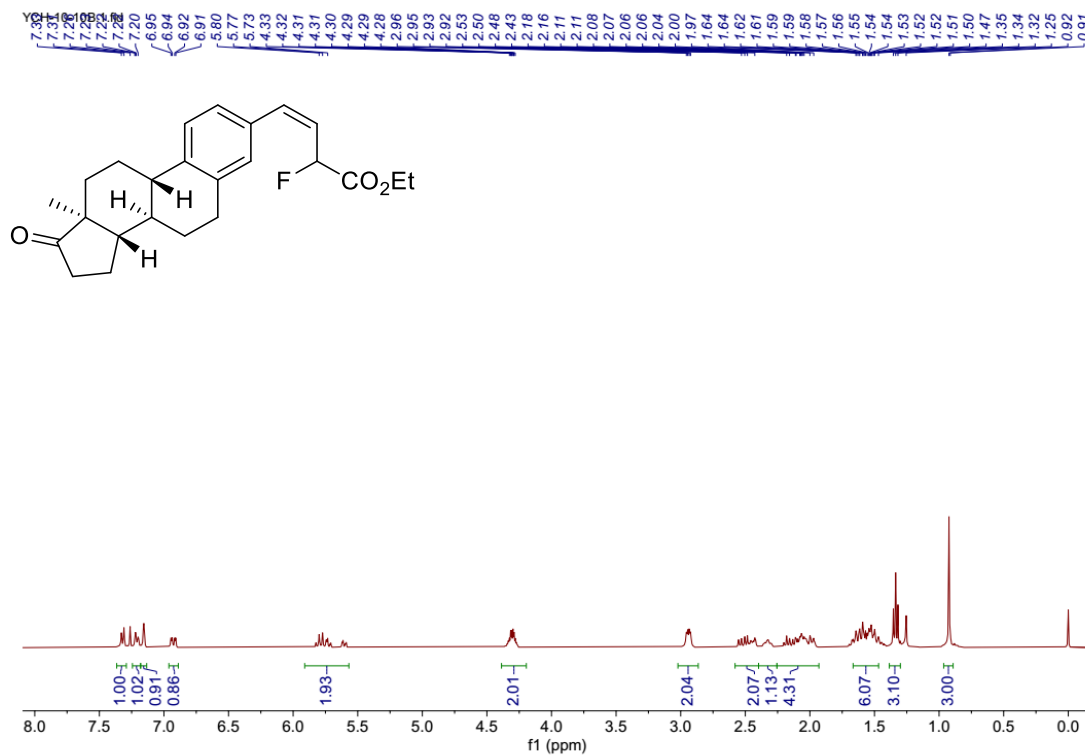

$^{19}\text{F}$  NMR (376 MHz, Chloroform-*d*) spectrum of compound **42**

YCH-10-10B.2.fid

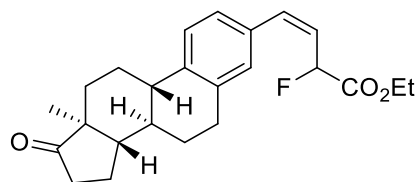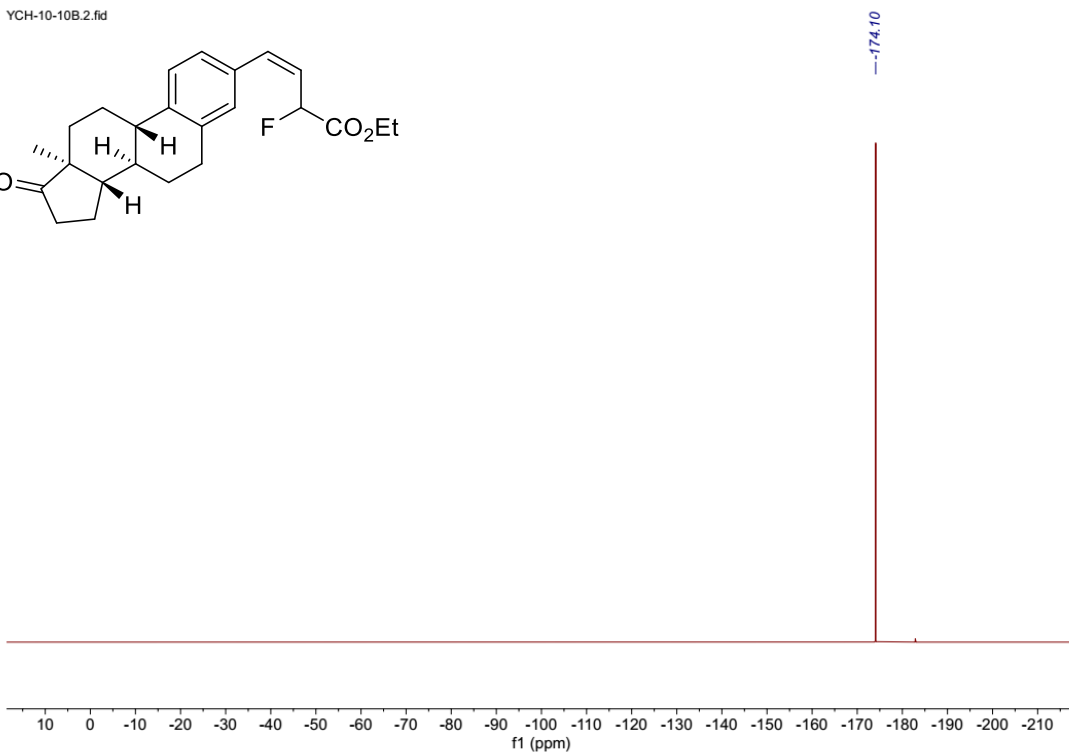

$^{13}\text{C}$  NMR (101 MHz, Chloroform-*d*) spectrum of compound **42**

YCH-10-10B.3.fid

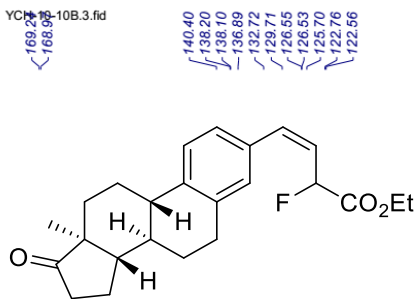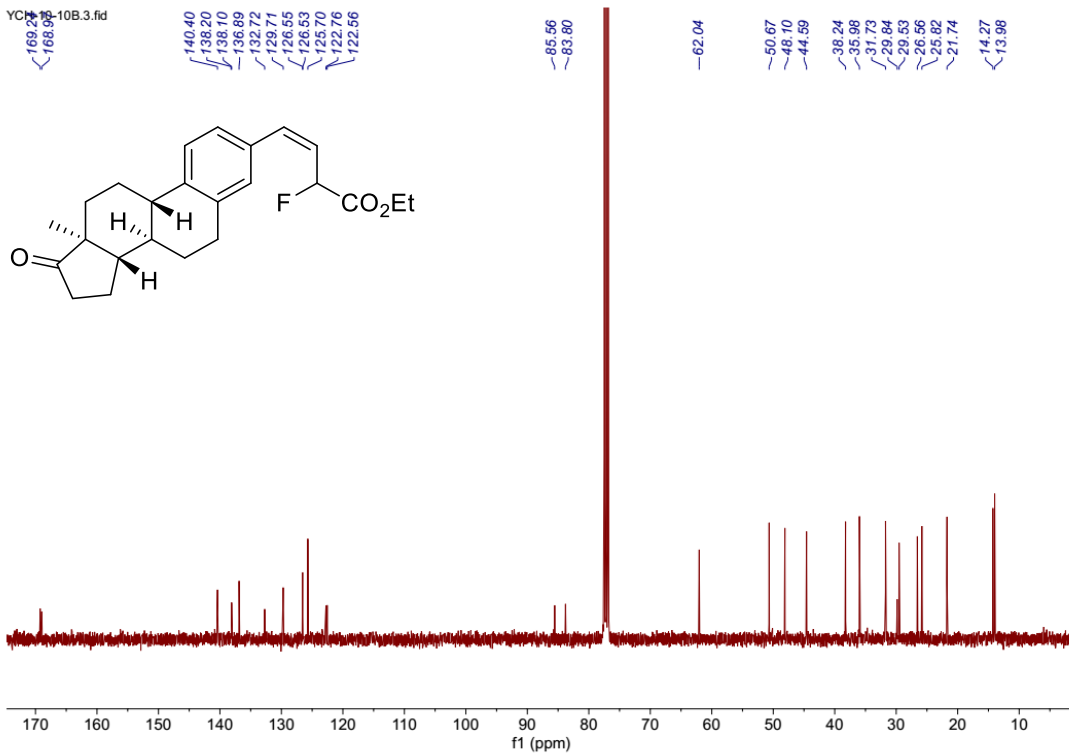

<sup>1</sup>H NMR (400 MHz, CDCl<sub>3</sub>) spectrum of compound **43**

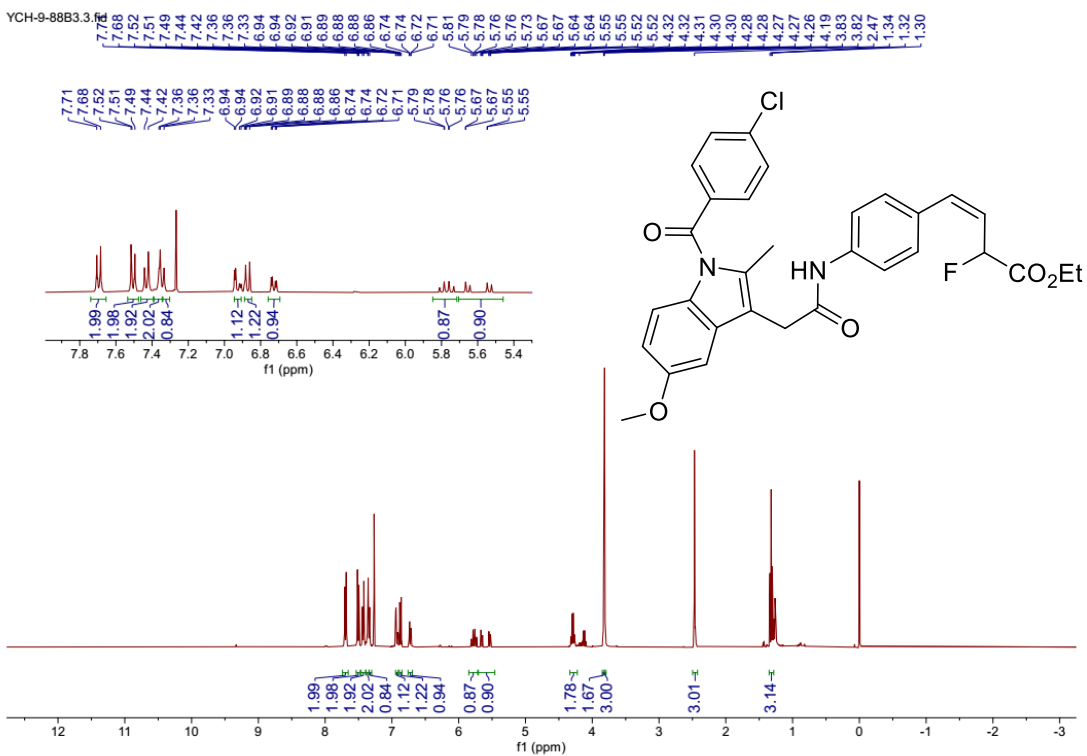

<sup>19</sup>F NMR (376 MHz, Chloroform-*d*) spectrum of compound **43**

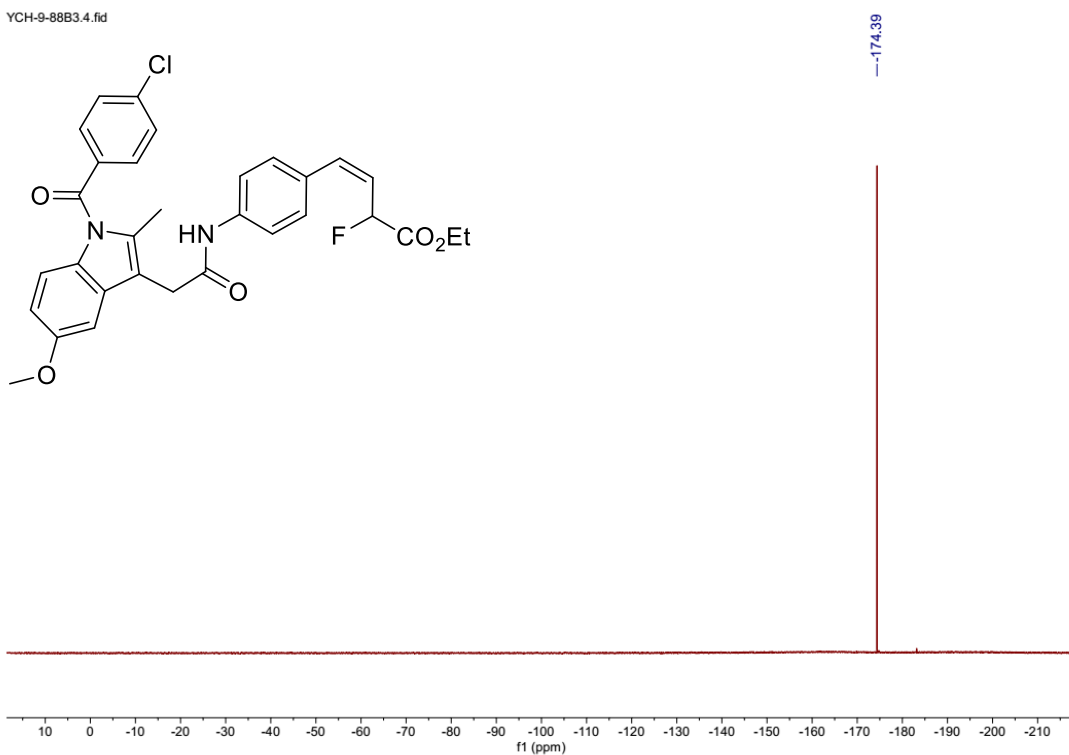



$^{13}\text{C}$  NMR (101 MHz, Chloroform-*d*) spectrum of compound **43**

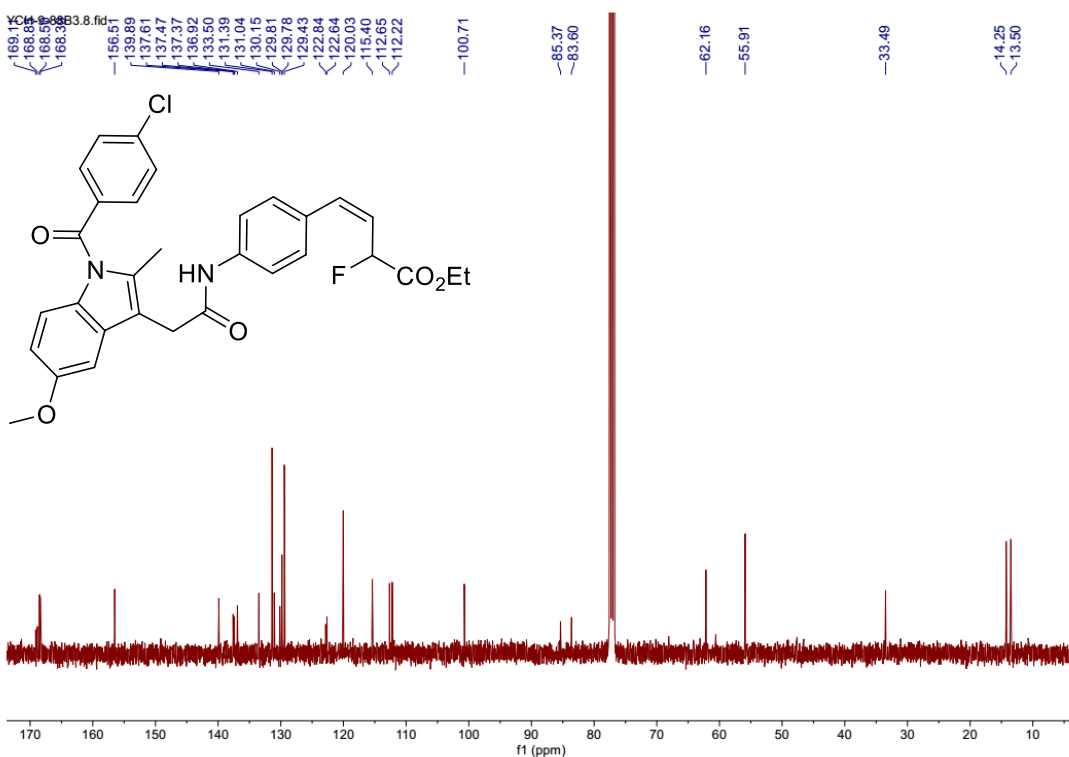

$^1\text{H}$  NMR (400 MHz,  $\text{CDCl}_3$ ) spectrum of compound **44**

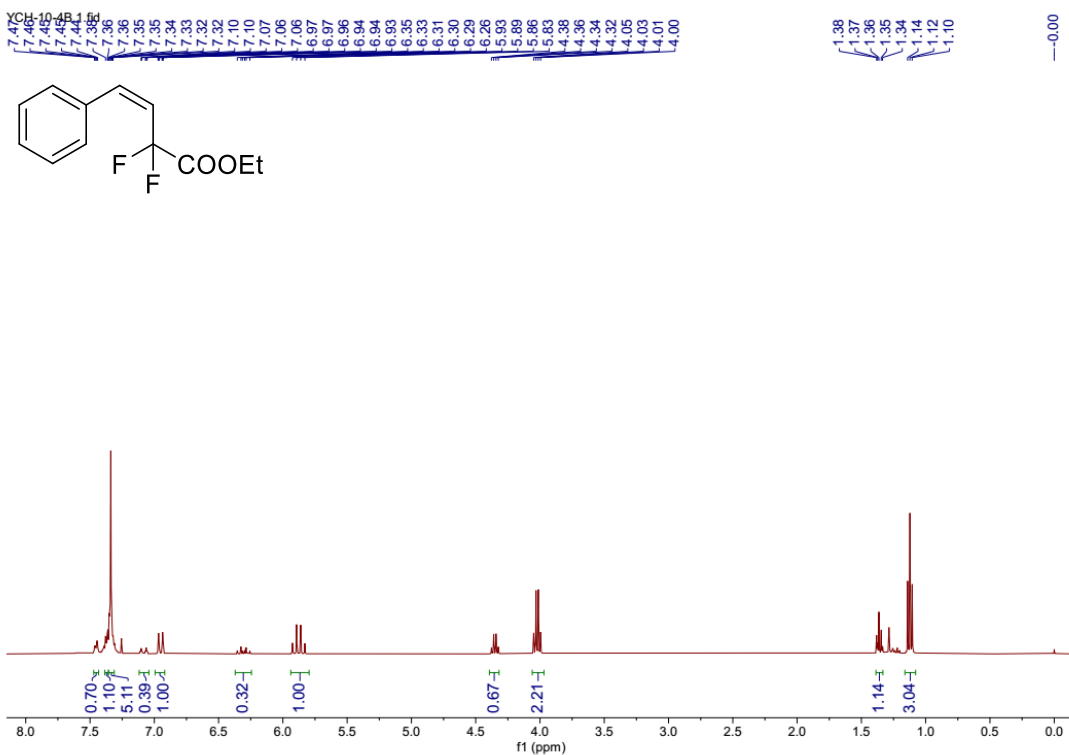

<sup>19</sup>F NMR (376 MHz, Chloroform-*d*) spectrum of compound **44**

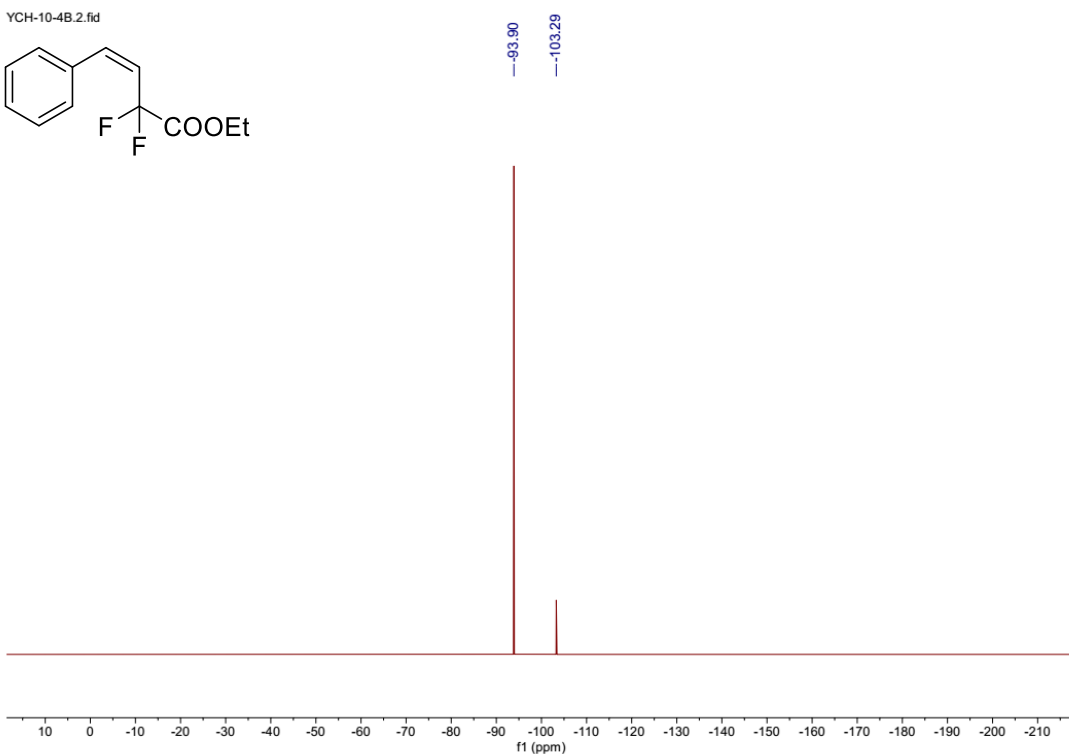

<sup>13</sup>C NMR (101 MHz, Chloroform-*d*) spectrum of compound **44**

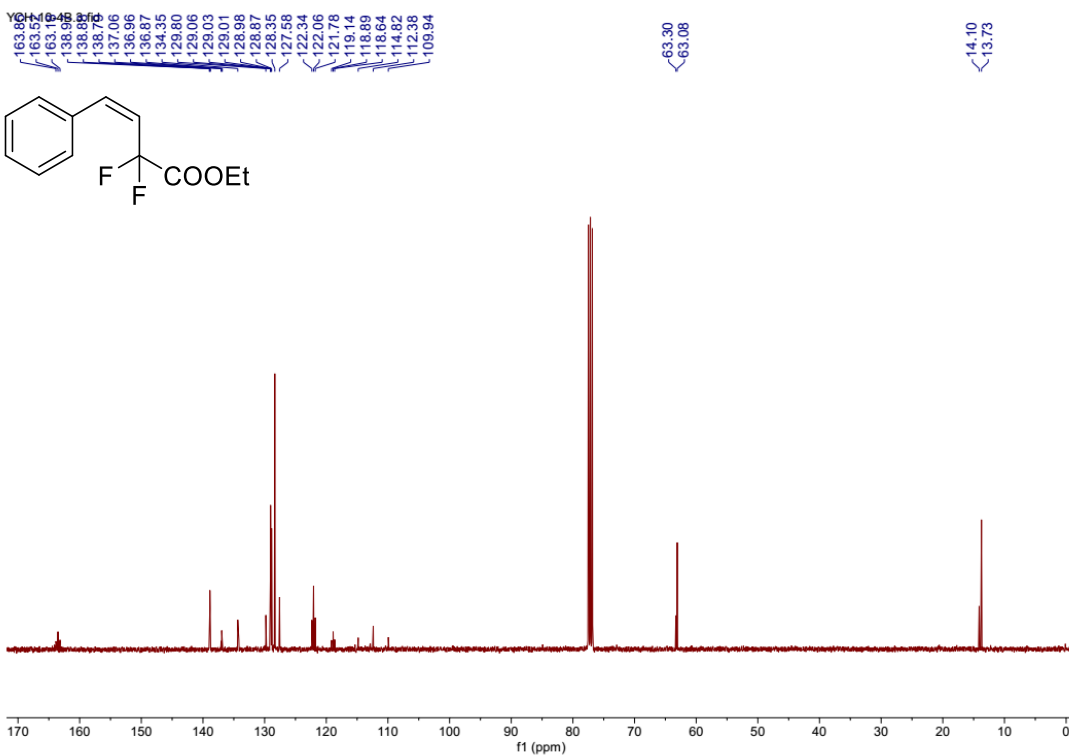

$^1\text{H}$  NMR (400 MHz,  $\text{CDCl}_3$ ) spectrum of compound **45**

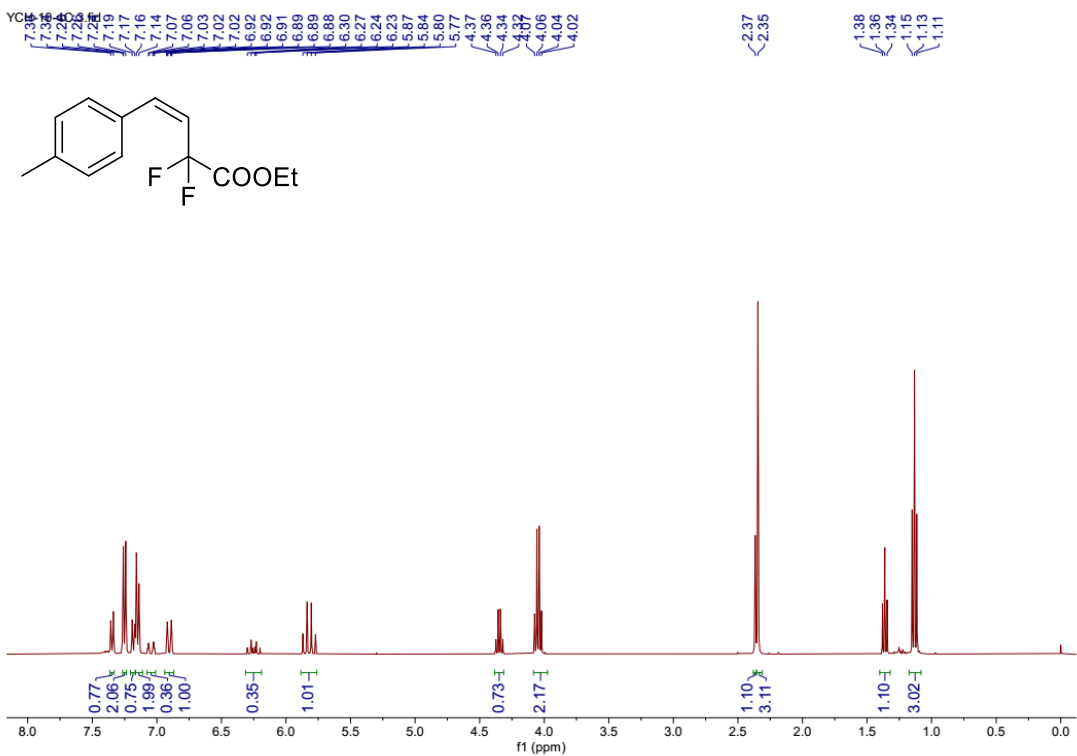

$^{19}\text{F}$  NMR (376 MHz,  $\text{Chloroform-}d$ ) spectrum of compound **45**

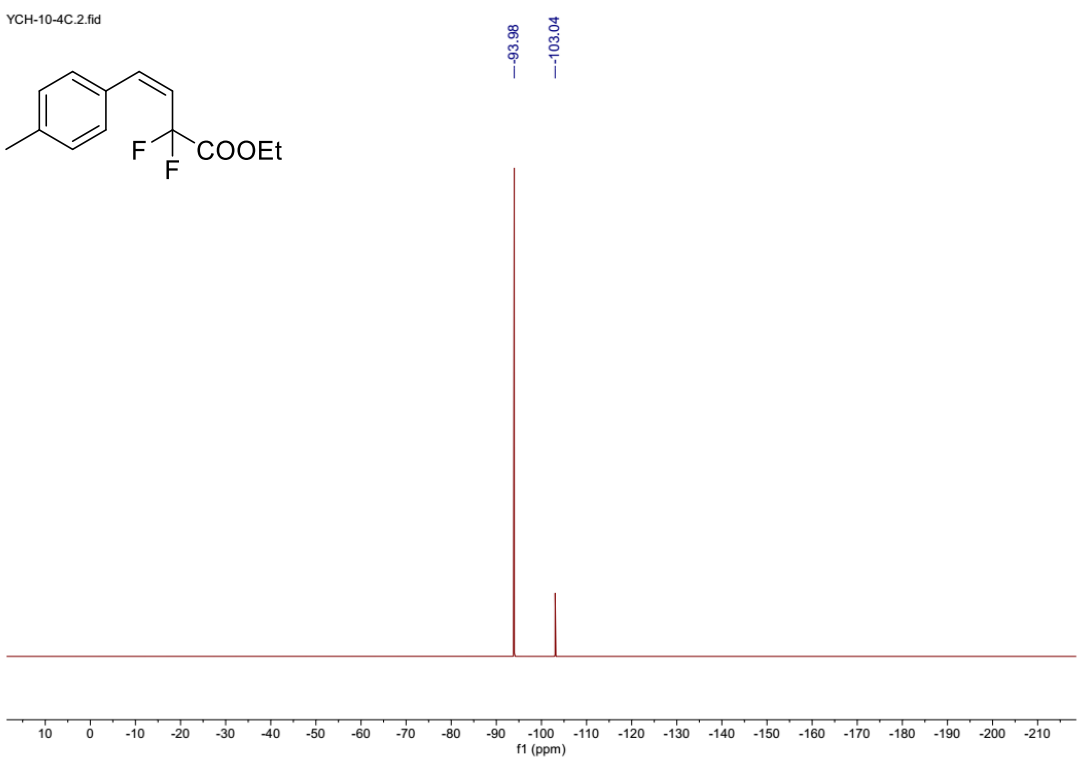

$^{13}\text{C}$  NMR (101 MHz, Chloroform-*d*) spectrum of compound **45**

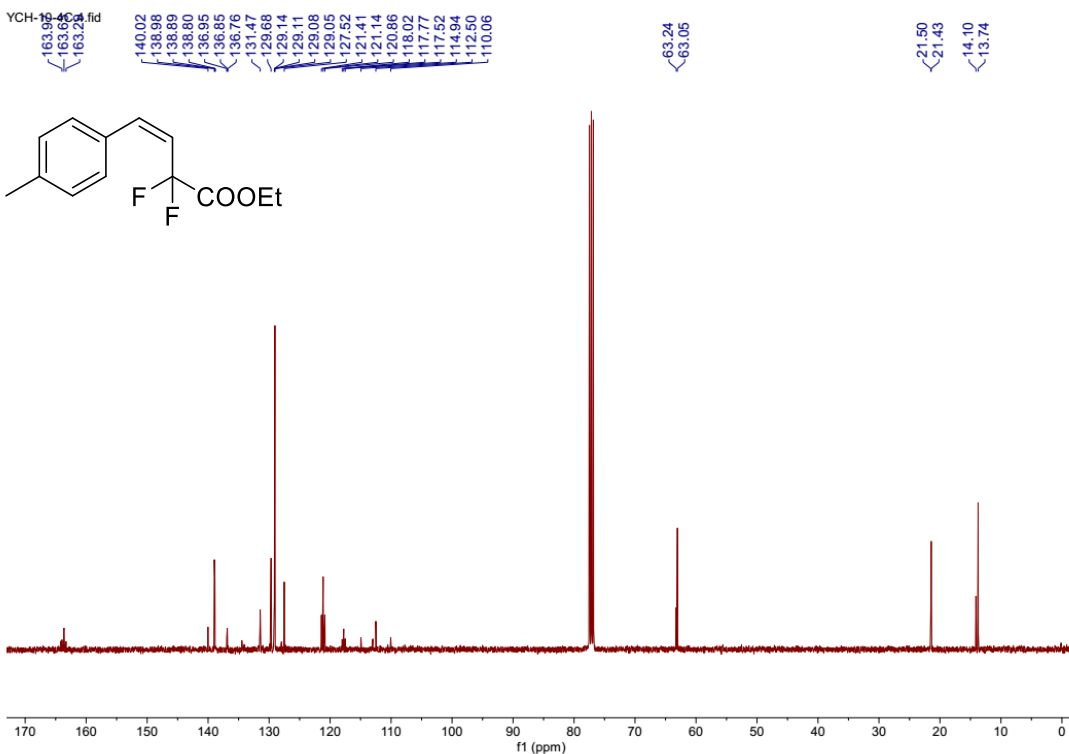

$^1\text{H}$  NMR (400 MHz,  $\text{CDCl}_3$ ) spectrum of compound **46**

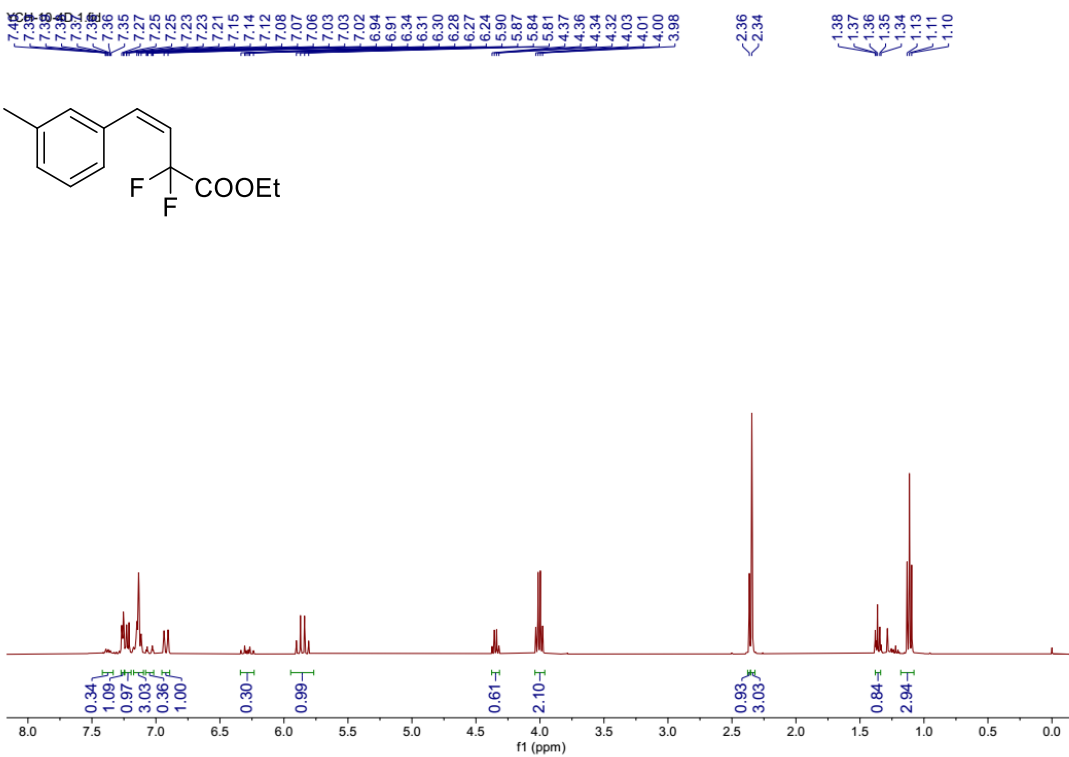

<sup>19</sup>F NMR (376 MHz, Chloroform-*d*) spectrum of compound **46**

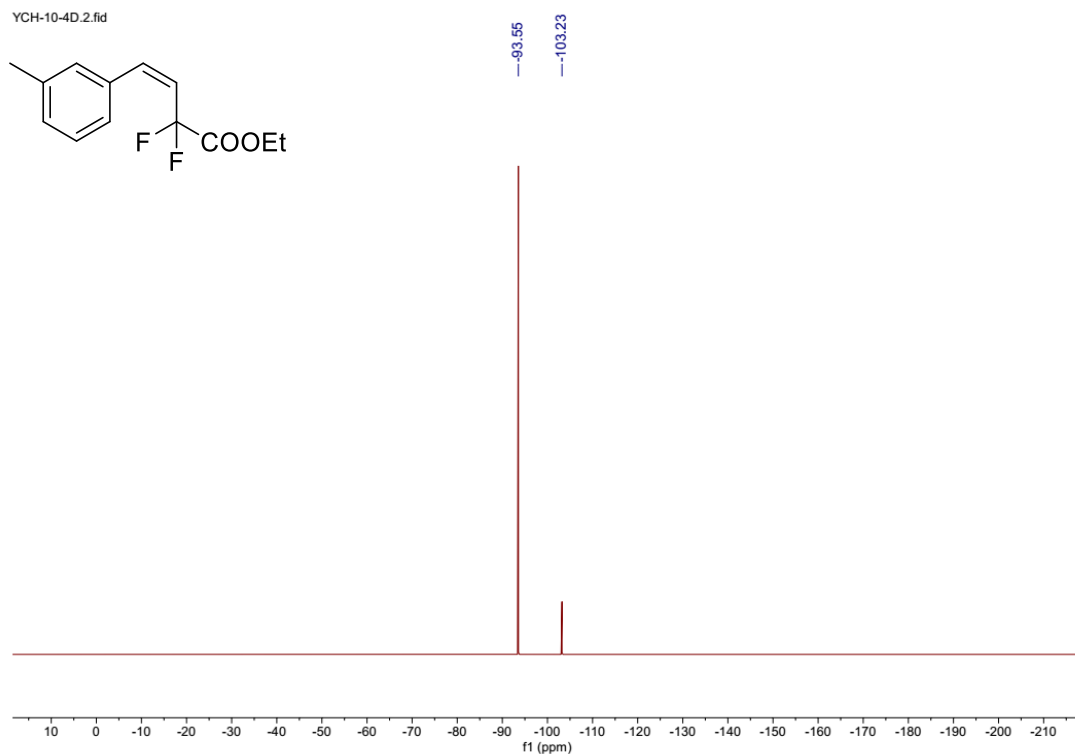

<sup>13</sup>C NMR (101 MHz, Chloroform-*d*) spectrum of compound **46**

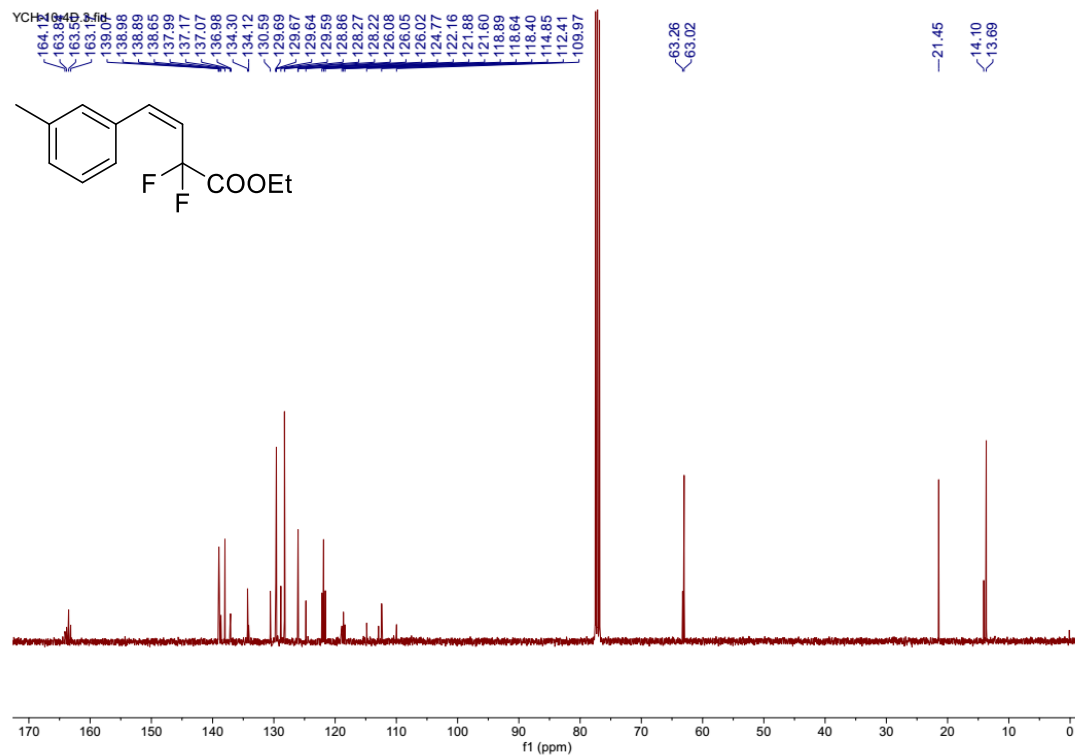

<sup>1</sup>H NMR (400 MHz, CDCl<sub>3</sub>) spectrum of compound **47**

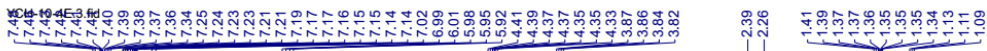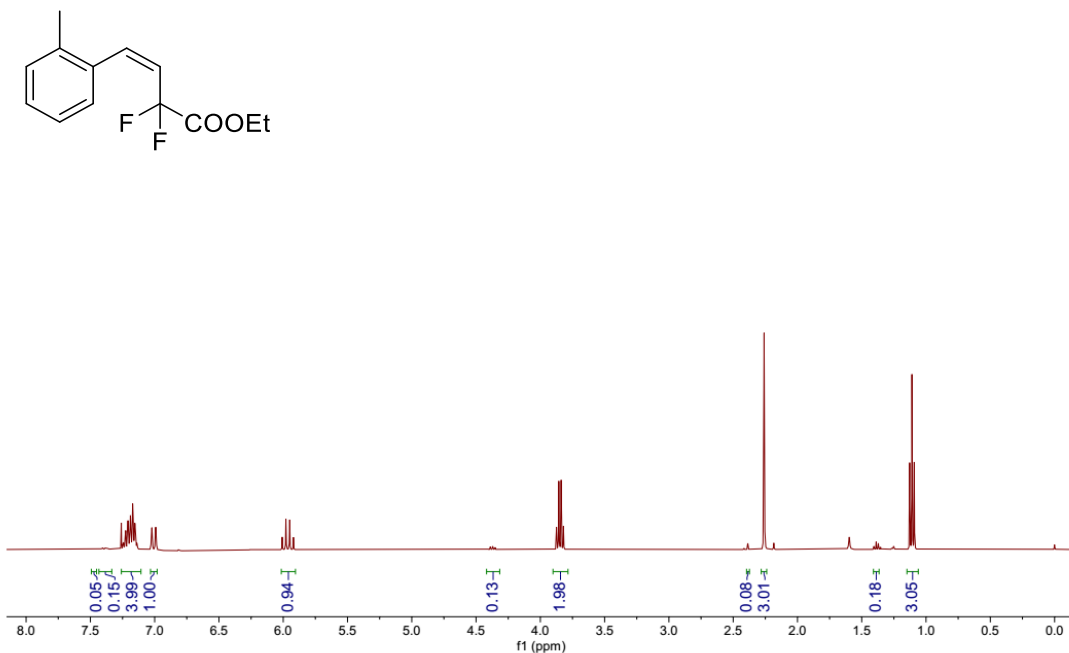

<sup>19</sup>F NMR (376 MHz, Chloroform-*d*) spectrum of compound **47**

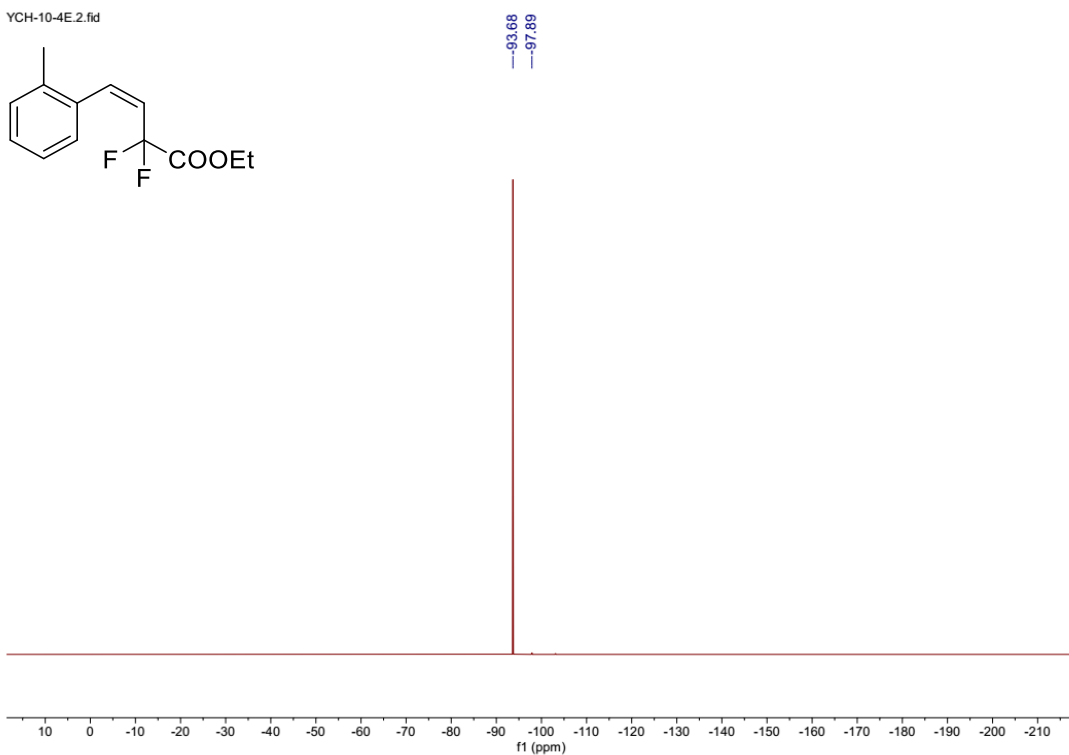

$^{13}\text{C}$  NMR (101 MHz, Chloroform-*d*) spectrum of compound **47**

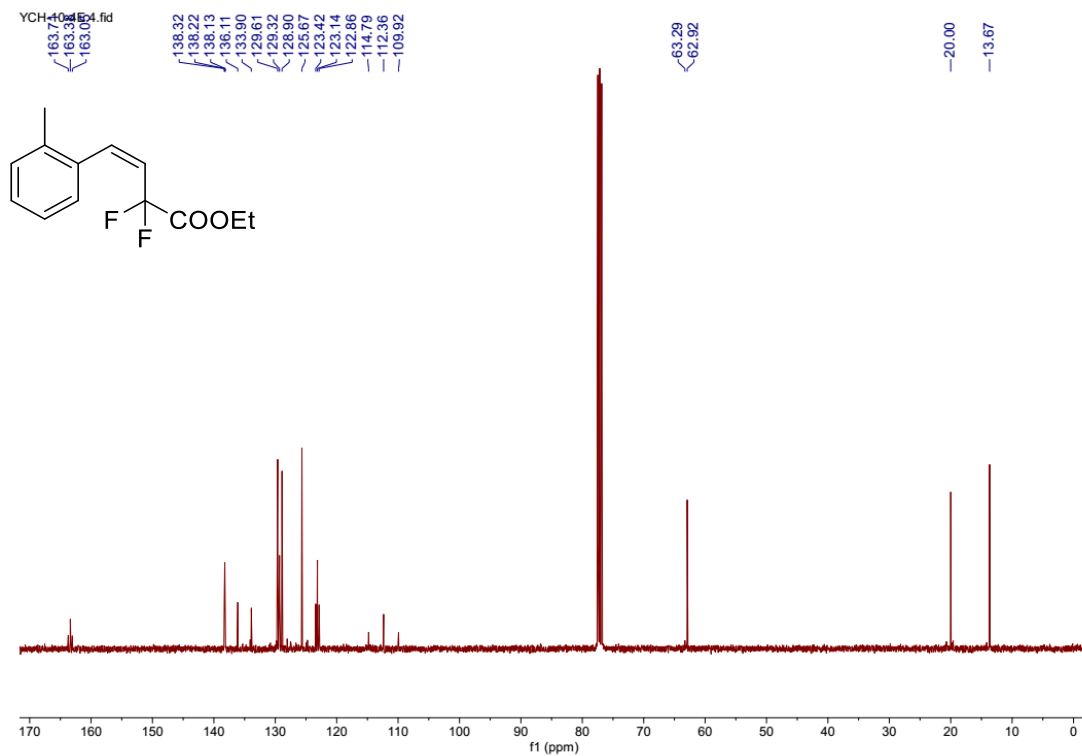

$^1\text{H}$  NMR (400 MHz,  $\text{CDCl}_3$ ) spectrum of compound **48**

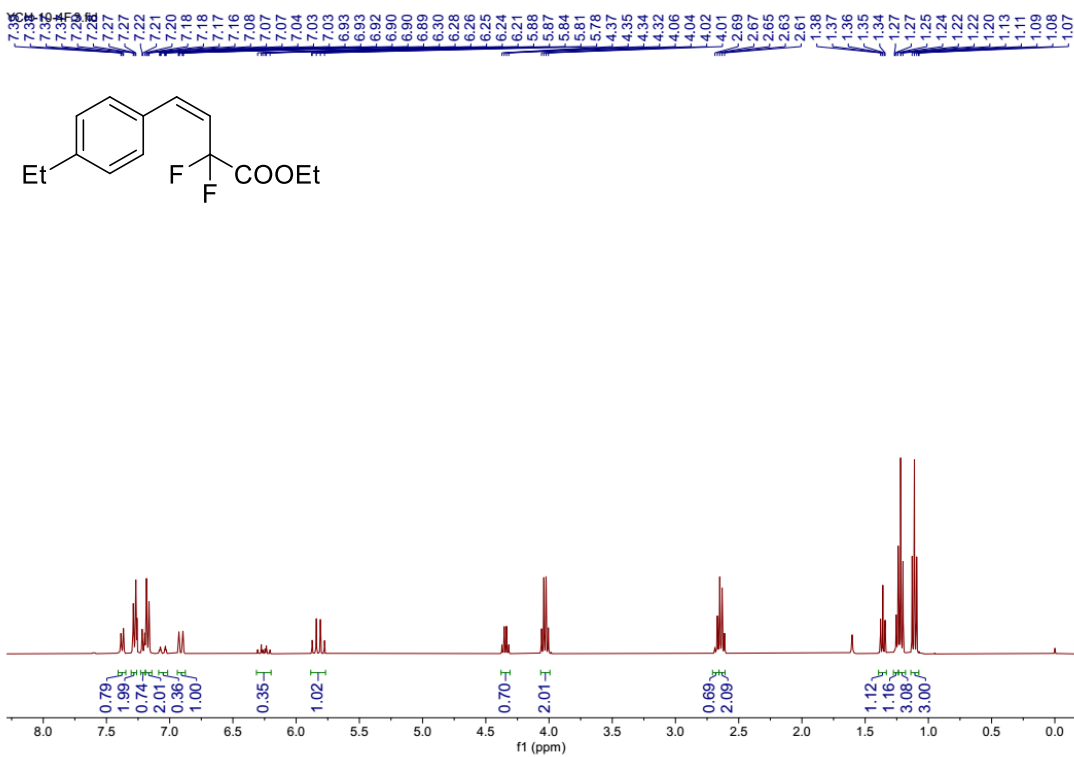

<sup>19</sup>F NMR (376 MHz, Chloroform-*d*) spectrum of compound **48**

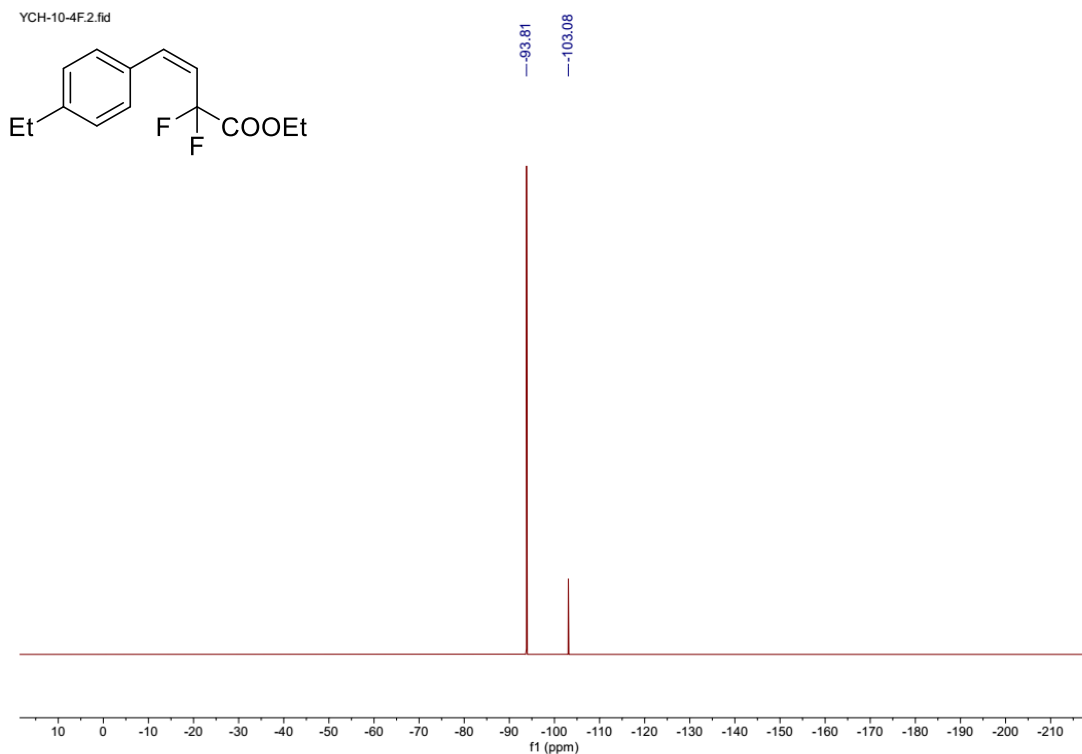

<sup>13</sup>C NMR (101 MHz, Chloroform-*d*) spectrum of compound **48**

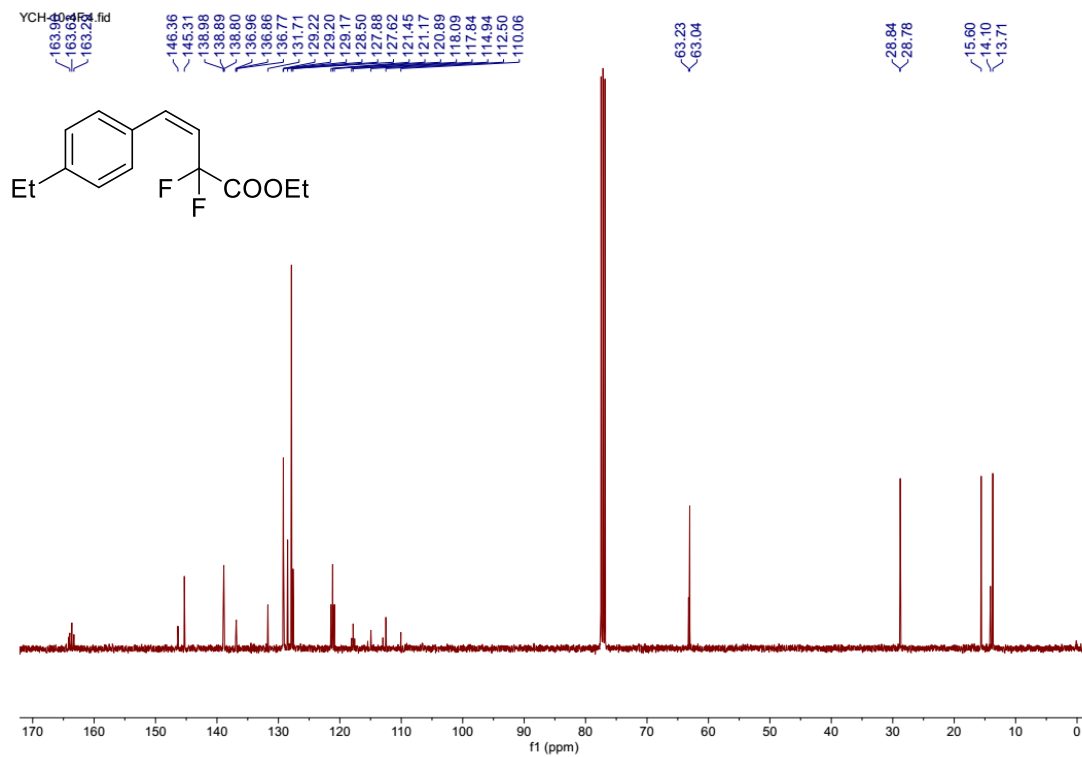



<sup>1</sup>H NMR (400 MHz, CDCl<sub>3</sub>) spectrum of compound **49**

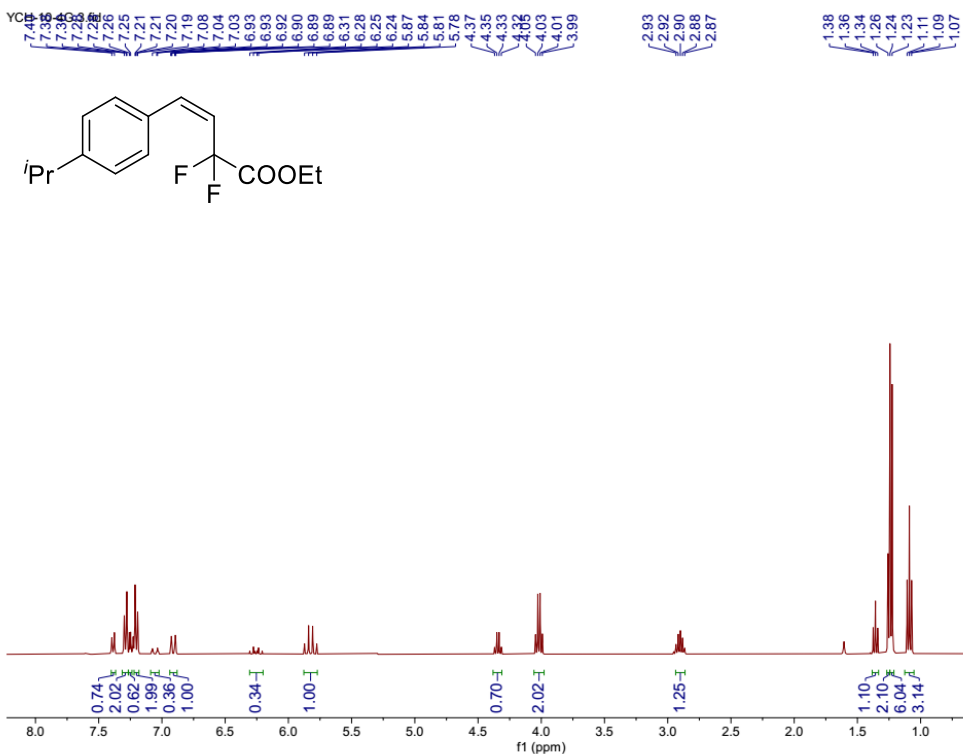

<sup>19</sup>F NMR (376 MHz, Chloroform-*d*) spectrum of compound **49**

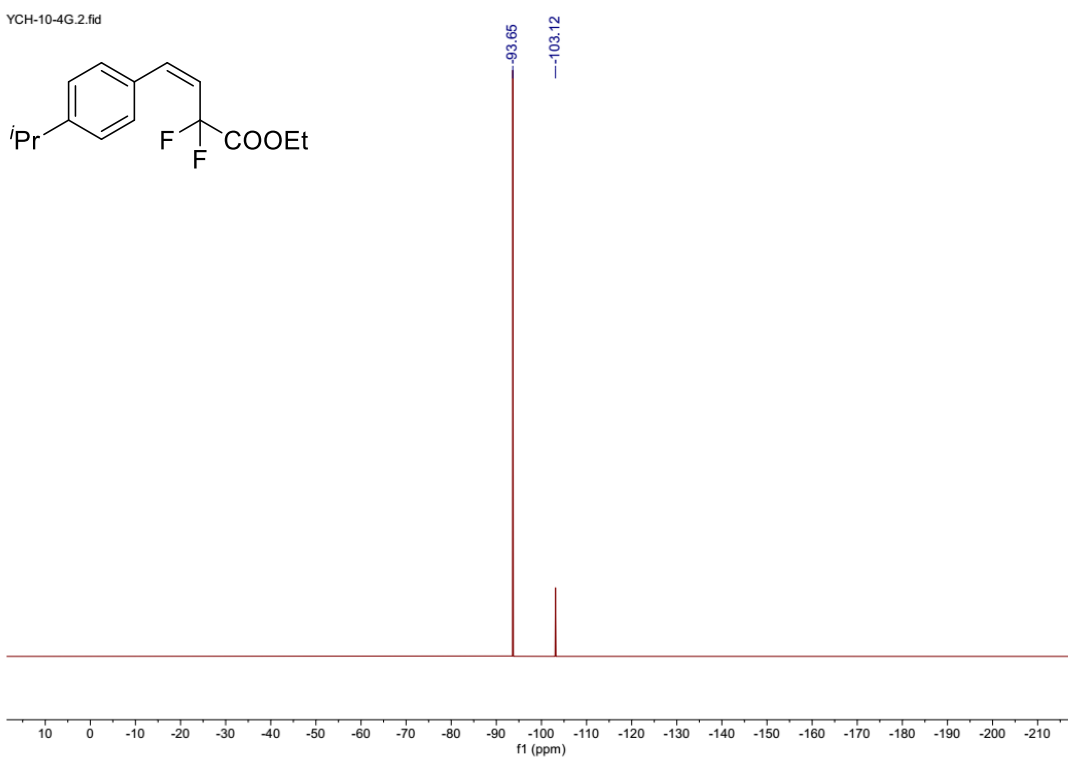

<sup>13</sup>C NMR (101 MHz, Chloroform-*d*) spectrum of compound **49**

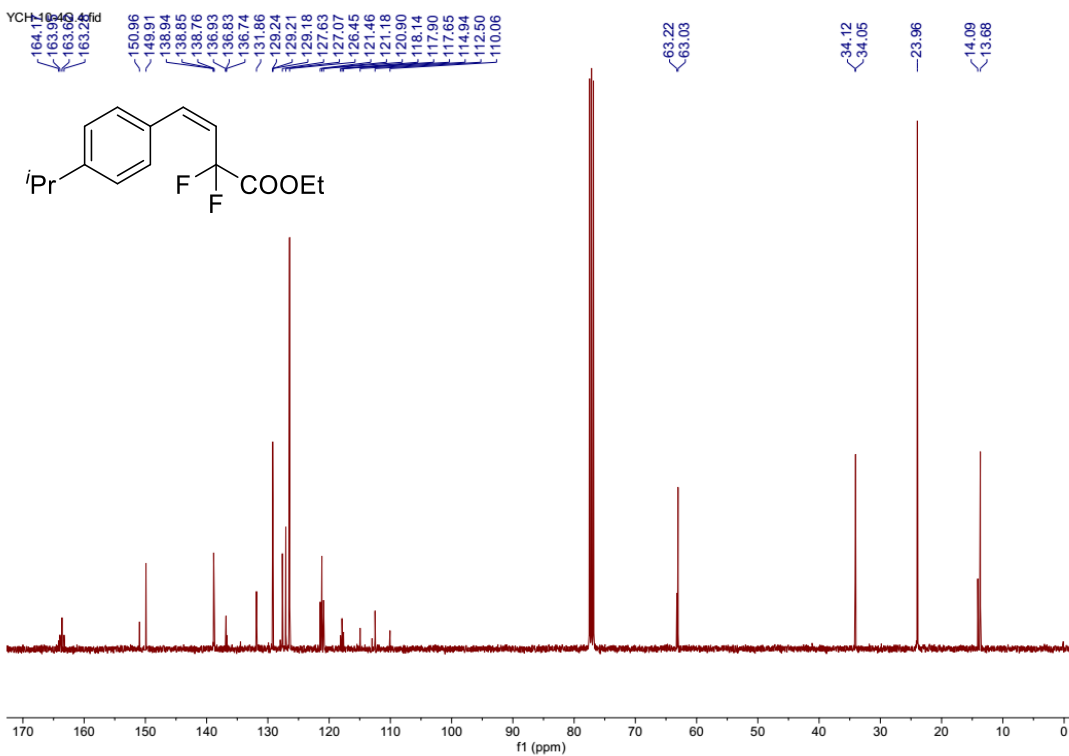

<sup>1</sup>H NMR (400 MHz, CDCl<sub>3</sub>) spectrum of compound **50**

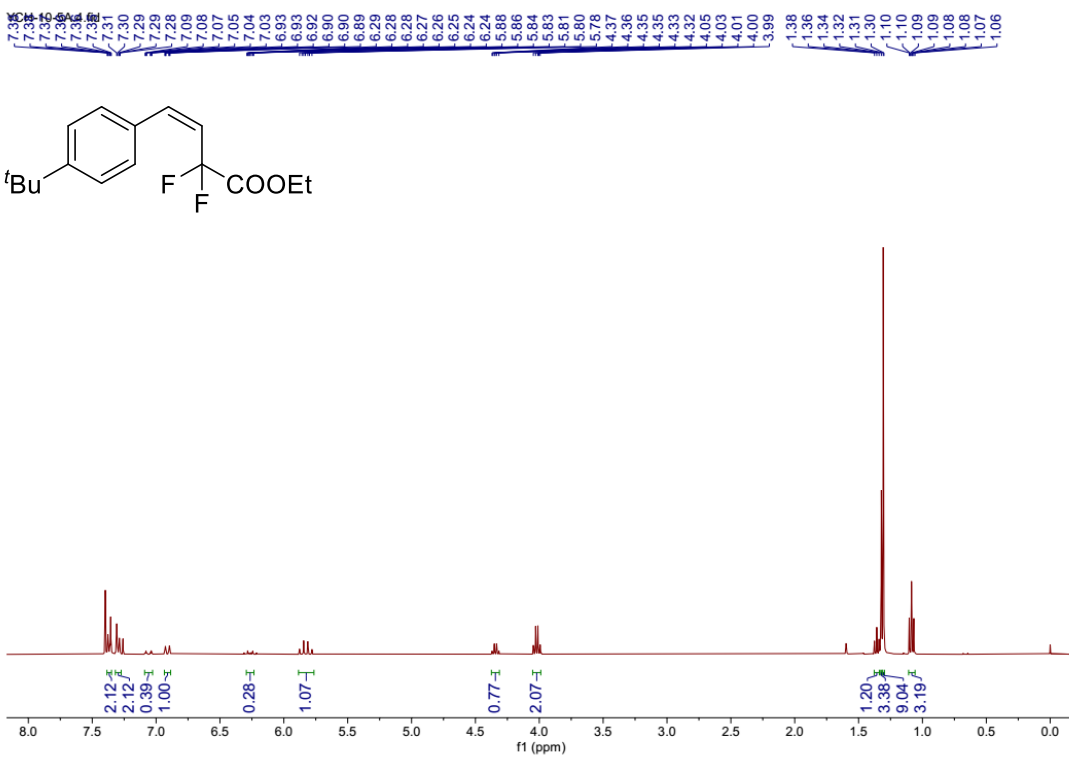

<sup>19</sup>F NMR (376 MHz, Chloroform-*d*) spectrum of compound **50**

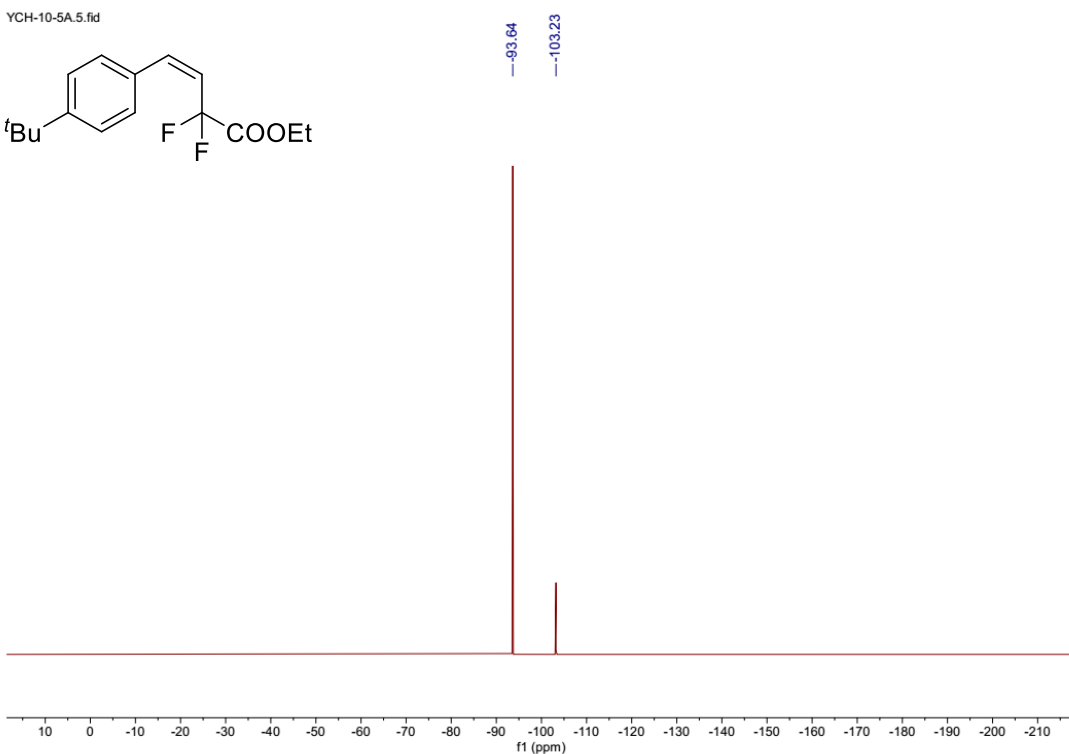

<sup>13</sup>C NMR (101 MHz, Chloroform-*d*) spectrum of compound **50**

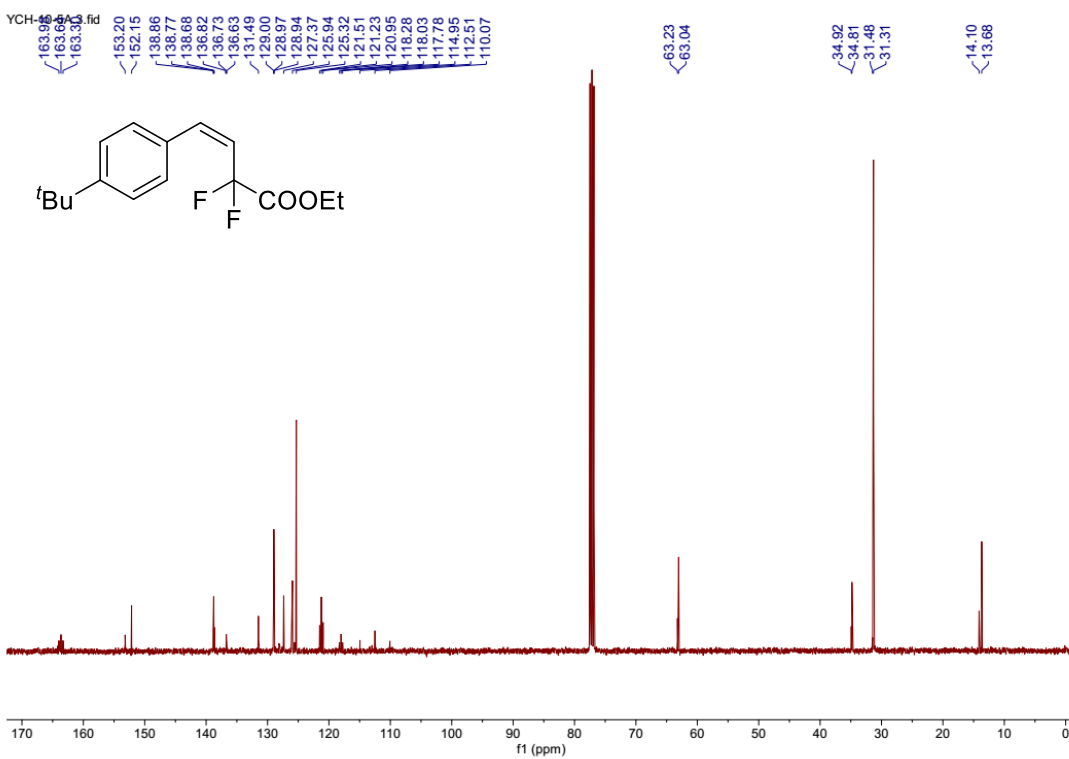

$^1\text{H}$  NMR (400 MHz,  $\text{CDCl}_3$ ) spectrum of compound **51**

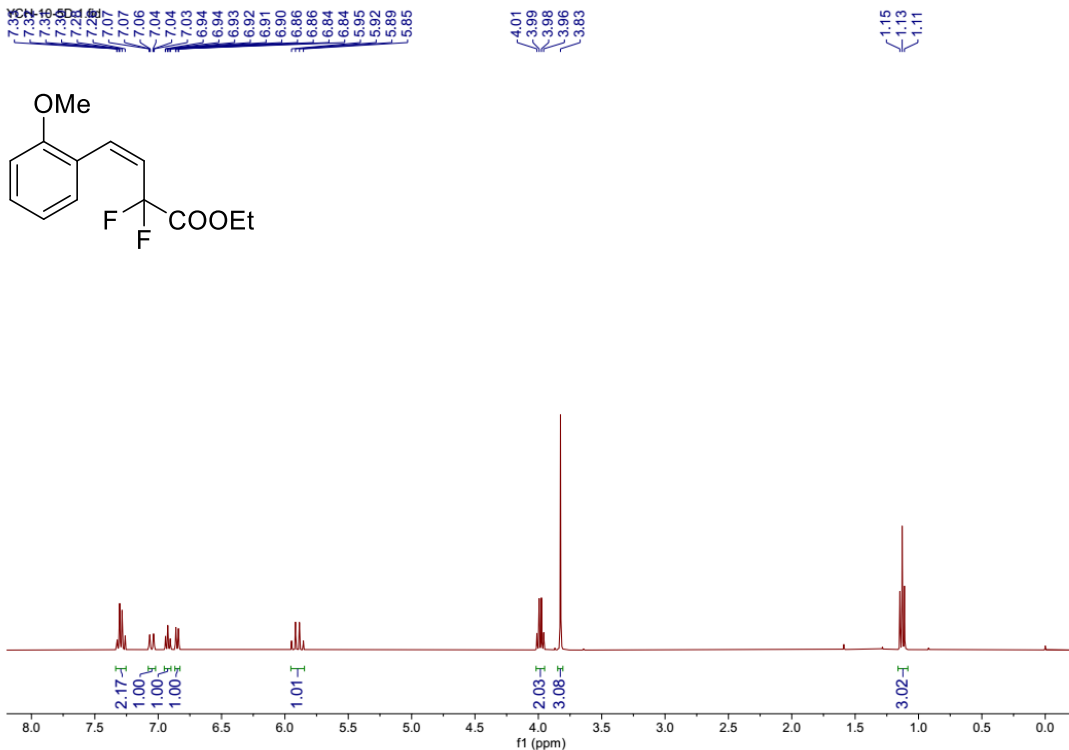

$^{19}\text{F}$  NMR (376 MHz, Chloroform-*d*) spectrum of compound **51**

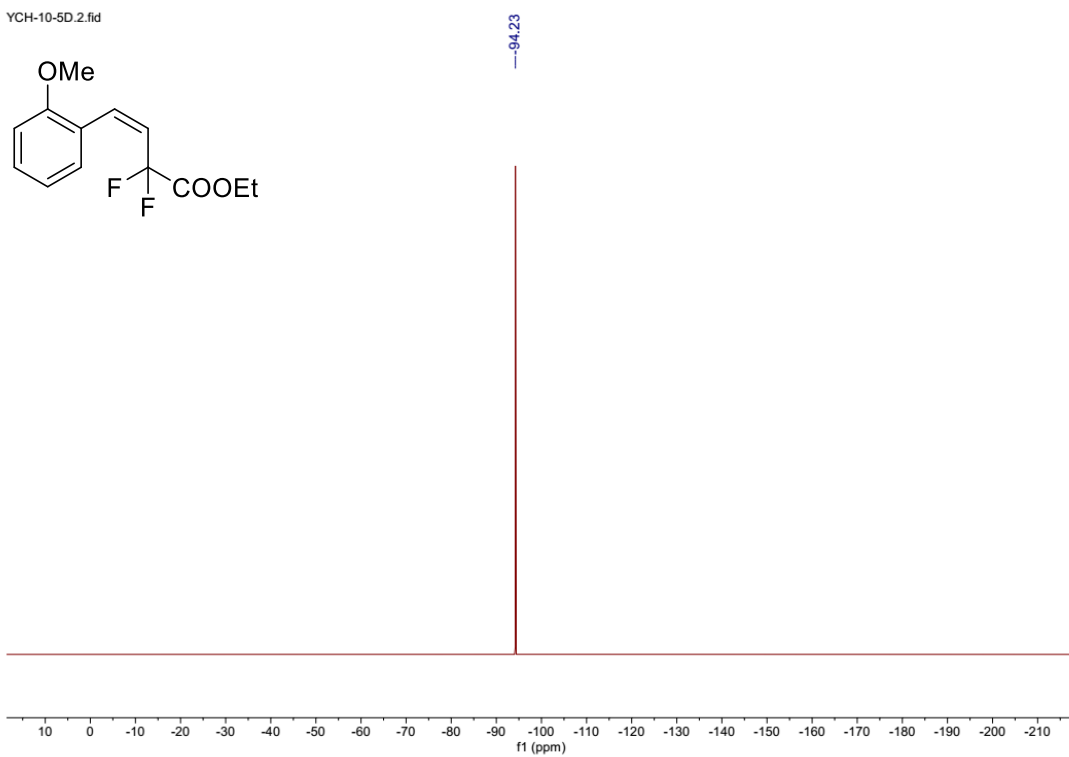

$^{13}\text{C}$  NMR (101 MHz, Chloroform-*d*) spectrum of compound **51**

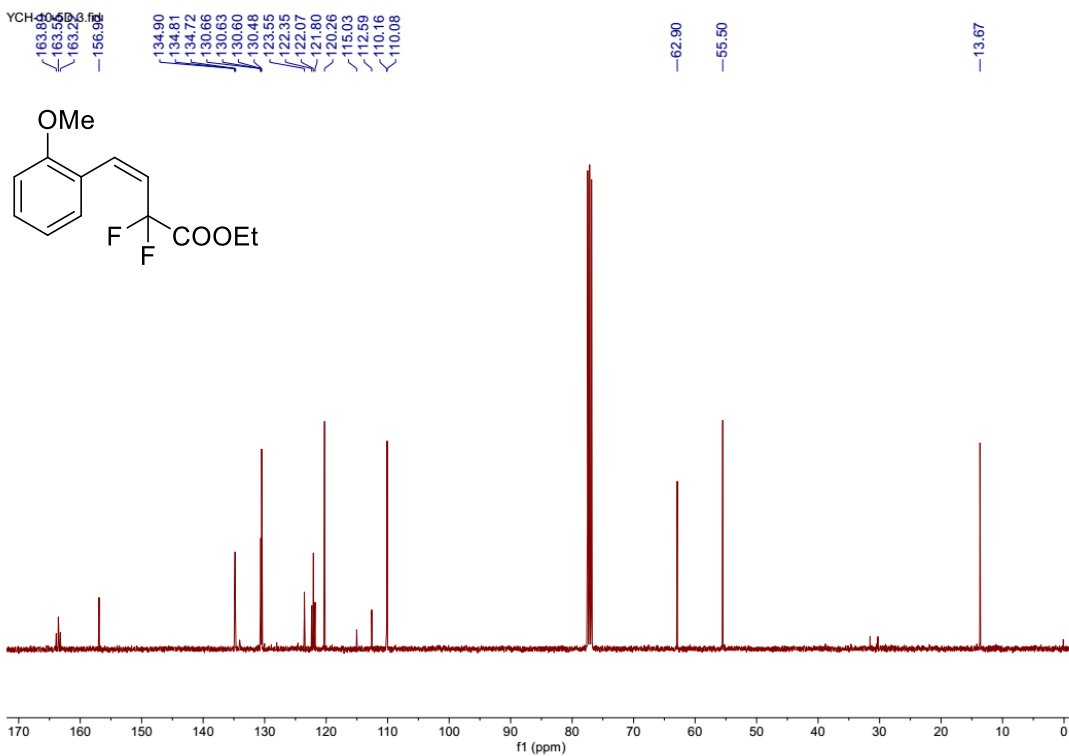

$^1\text{H}$  NMR (400 MHz,  $\text{CDCl}_3$ ) spectrum of compound **52**

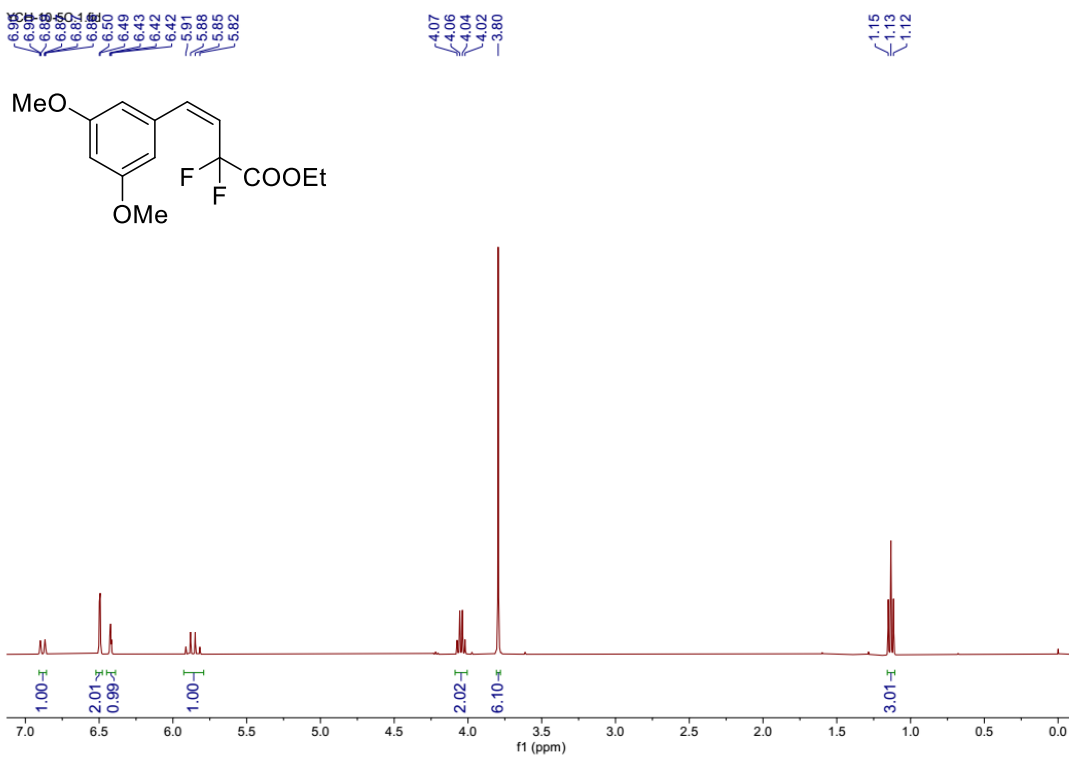

$^{19}\text{F}$  NMR (376 MHz, Chloroform-*d*) spectrum of compound **52**

YCH-10-5C.2.fid

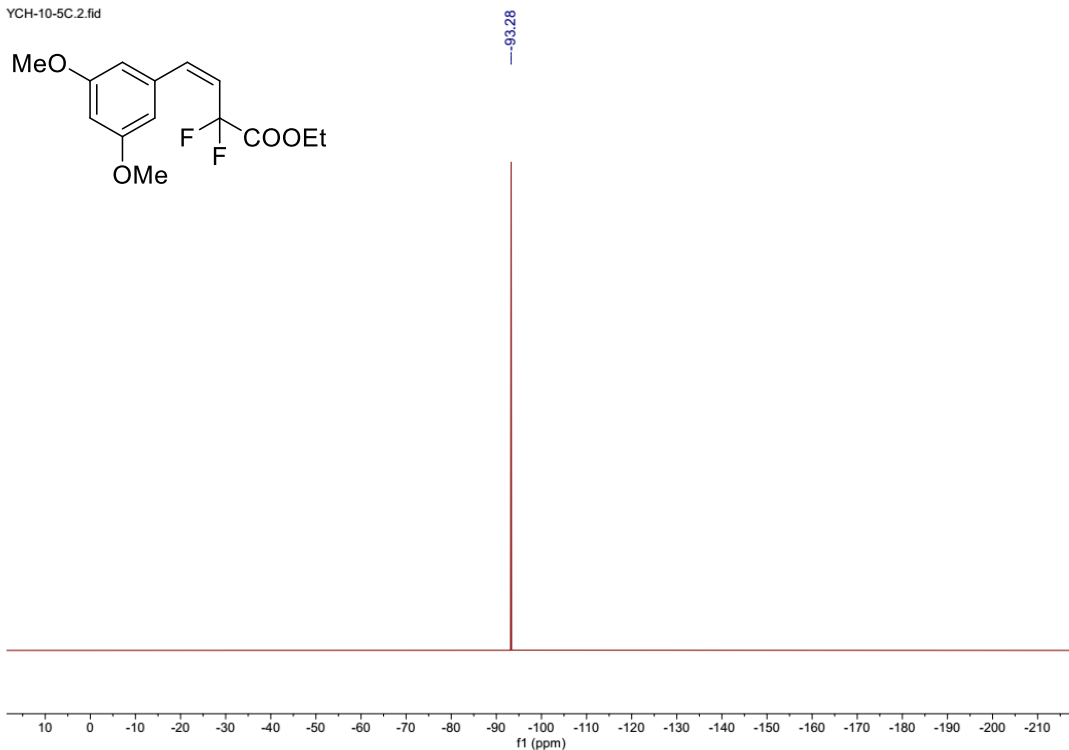

$^{13}\text{C}$  NMR (101 MHz, Chloroform-*d*) spectrum of compound **52**

YCH-10-5C.2.fid

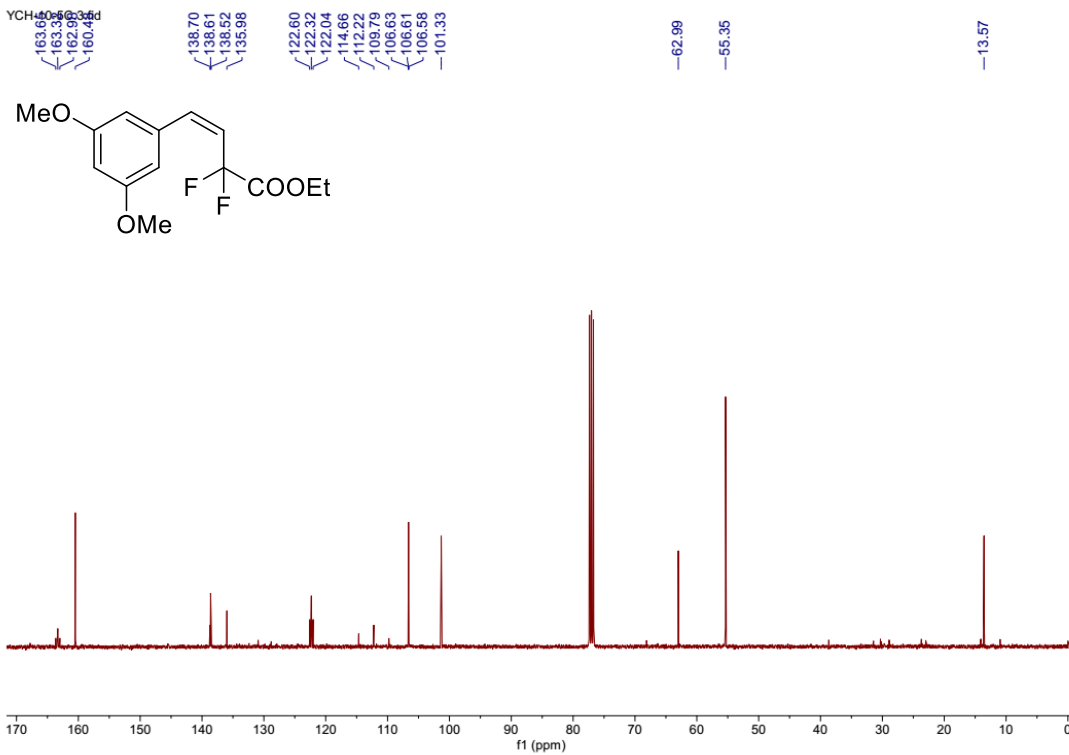

<sup>1</sup>H NMR (400 MHz, CDCl<sub>3</sub>) spectrum of compound **53**

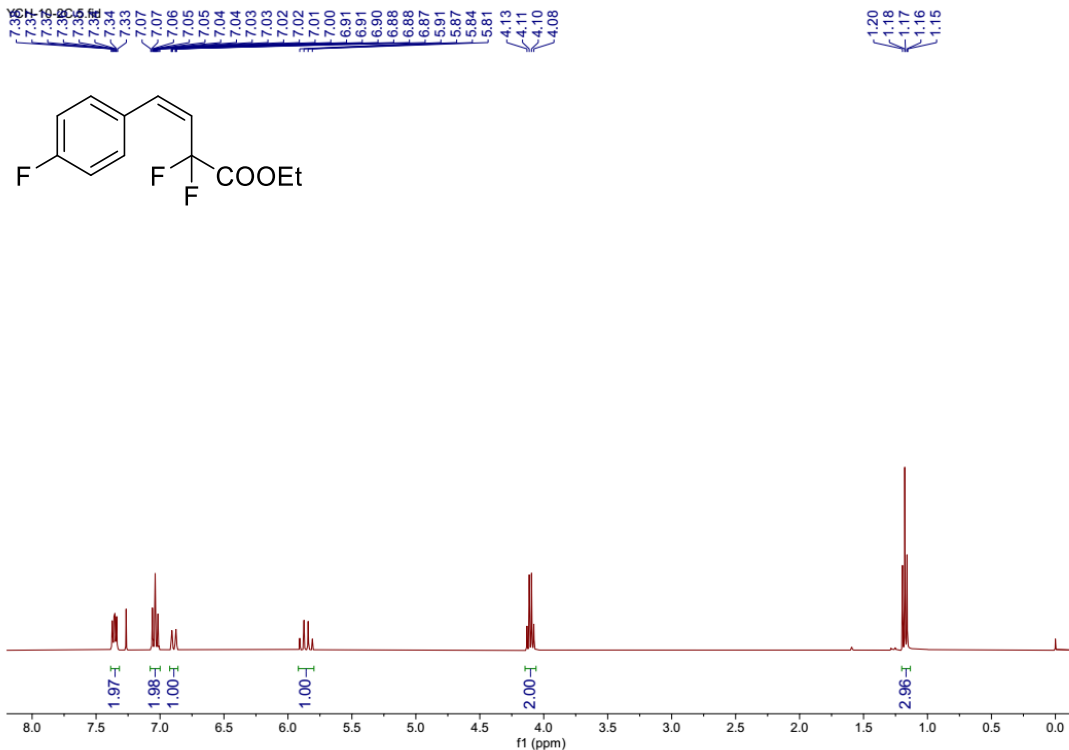

<sup>19</sup>F NMR (376 MHz, Chloroform-*d*) spectrum of compound **53**

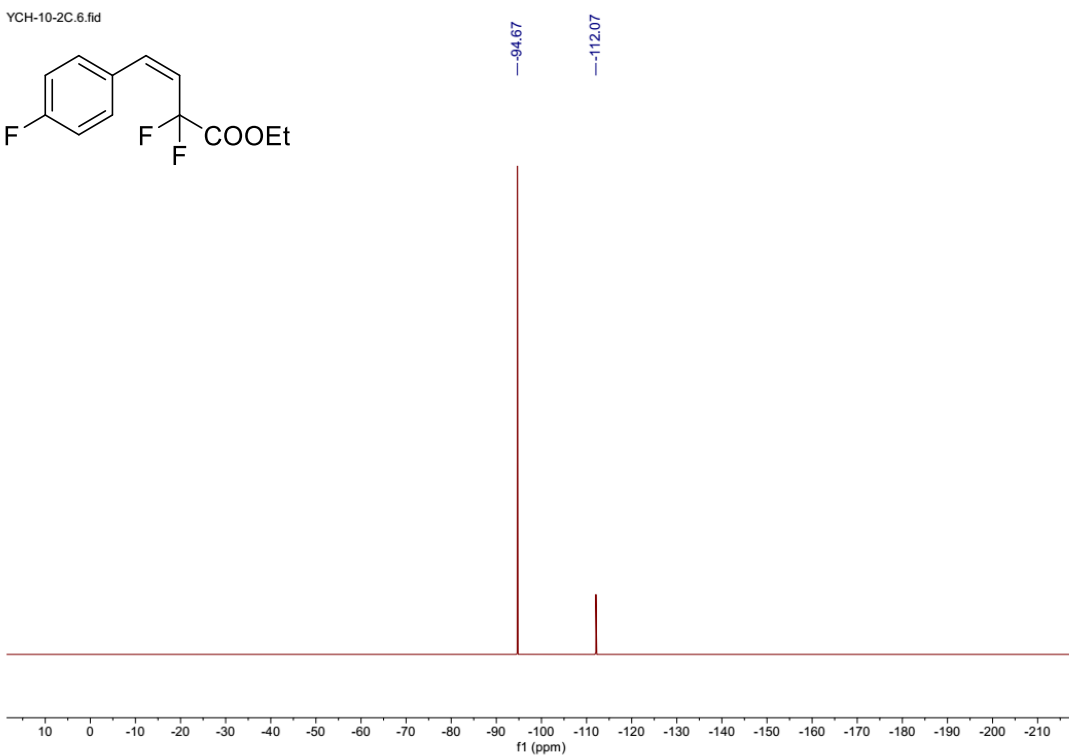

$^{13}\text{C}$  NMR (101 MHz, Chloroform-*d*) spectrum of compound **53**

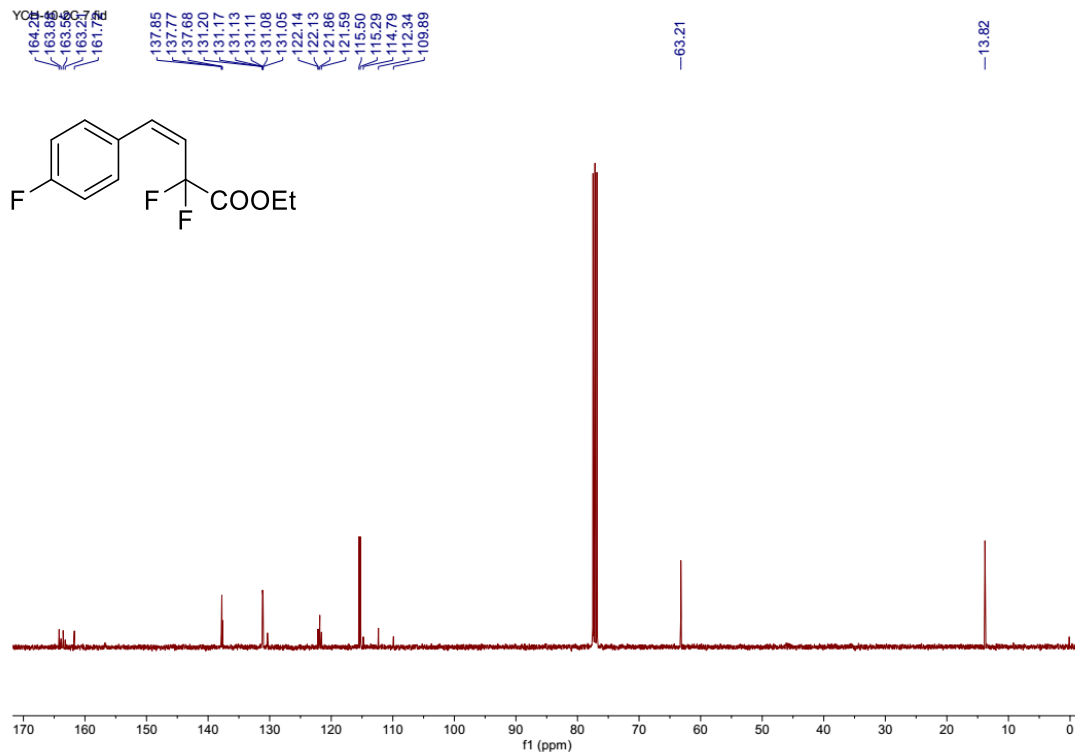

$^1\text{H}$  NMR (400 MHz,  $\text{CDCl}_3$ ) spectrum of compound **54**

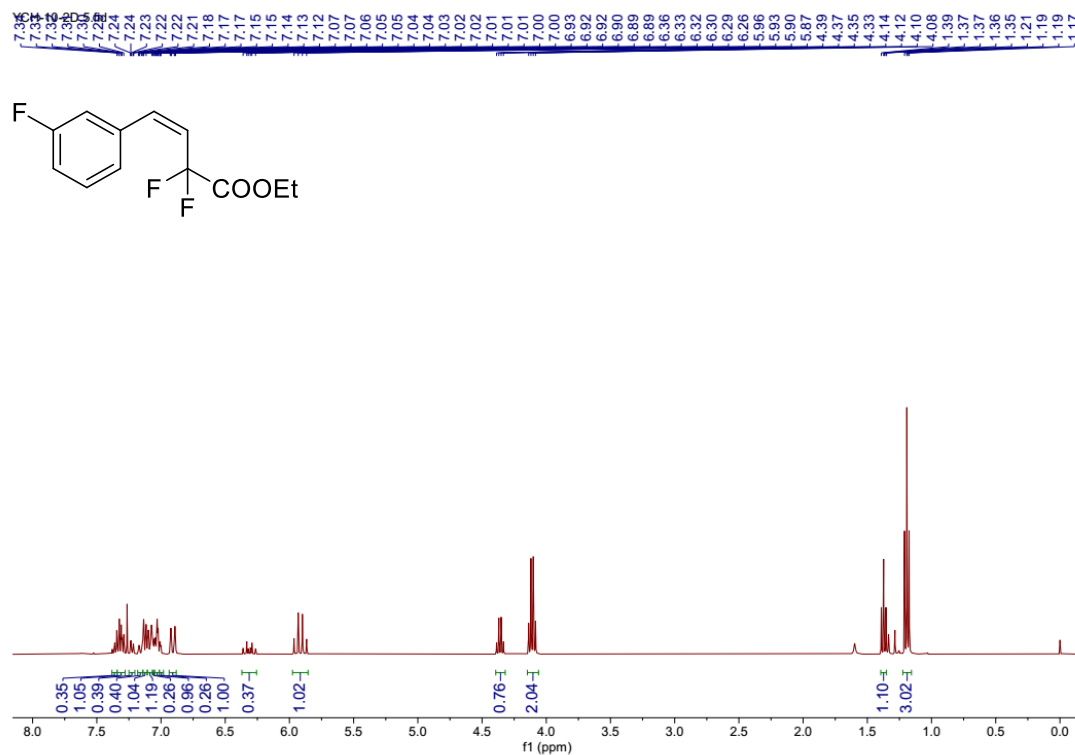



<sup>19</sup>F NMR (376 MHz, Chloroform-*d*) spectrum of compound **54**

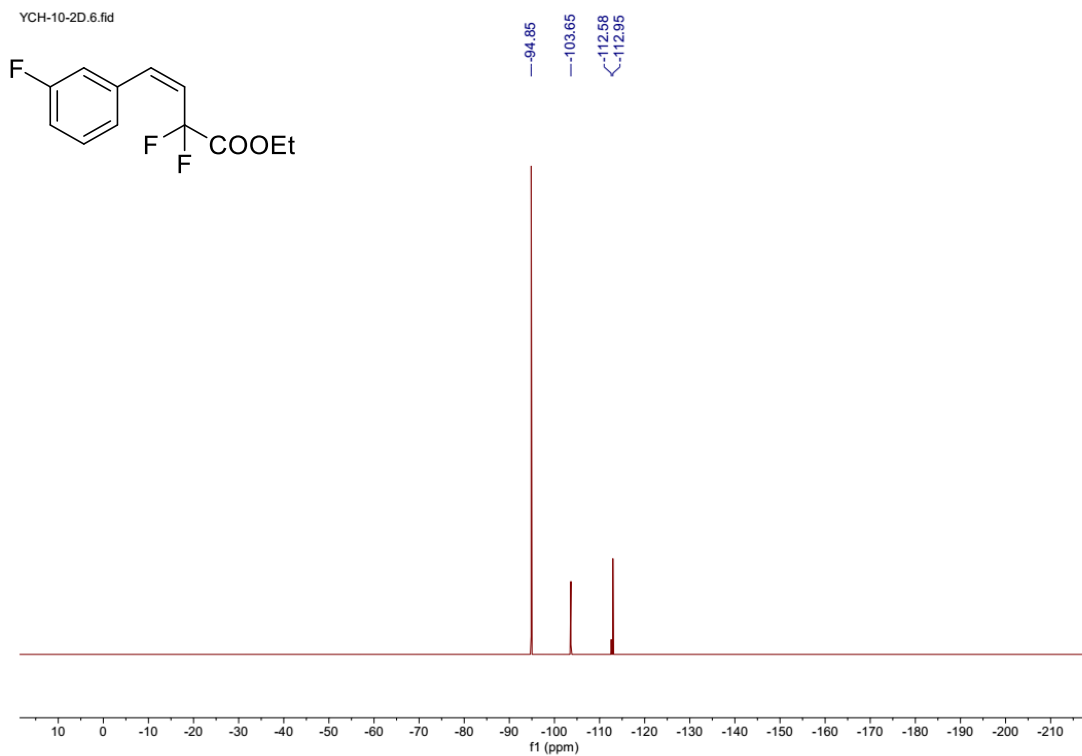

<sup>13</sup>C NMR (101 MHz, Chloroform-*d*) spectrum of compound **54**

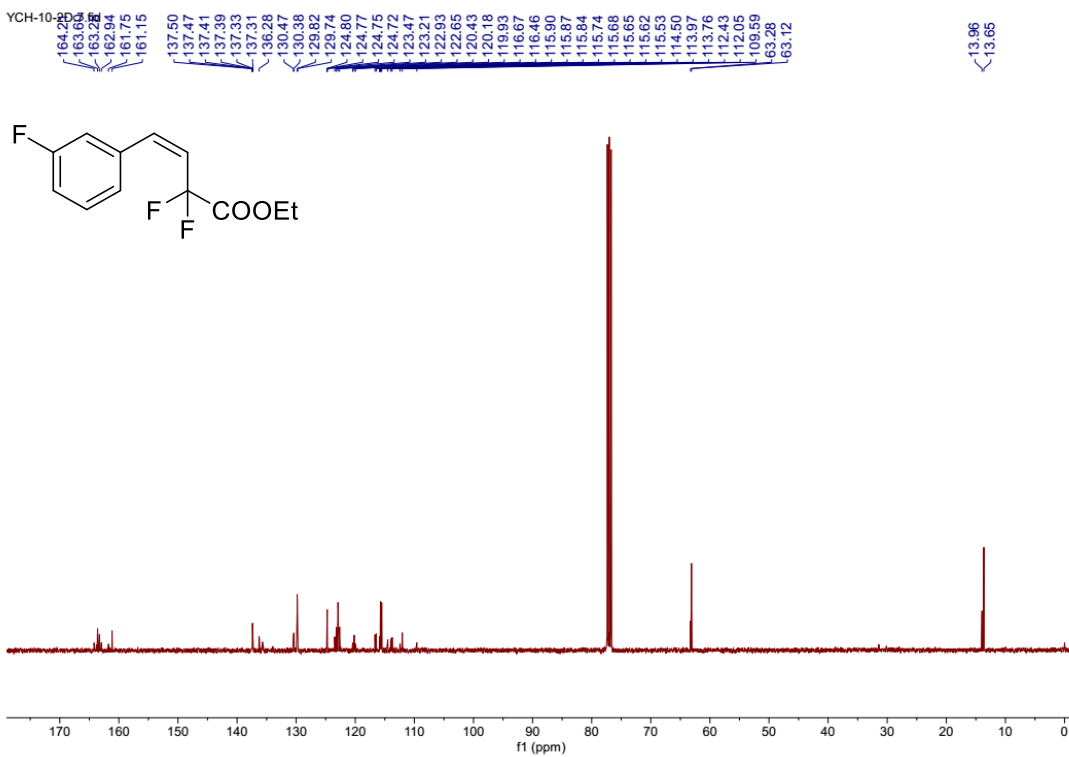

<sup>1</sup>H NMR (400 MHz, CDCl<sub>3</sub>) spectrum of compound **55**

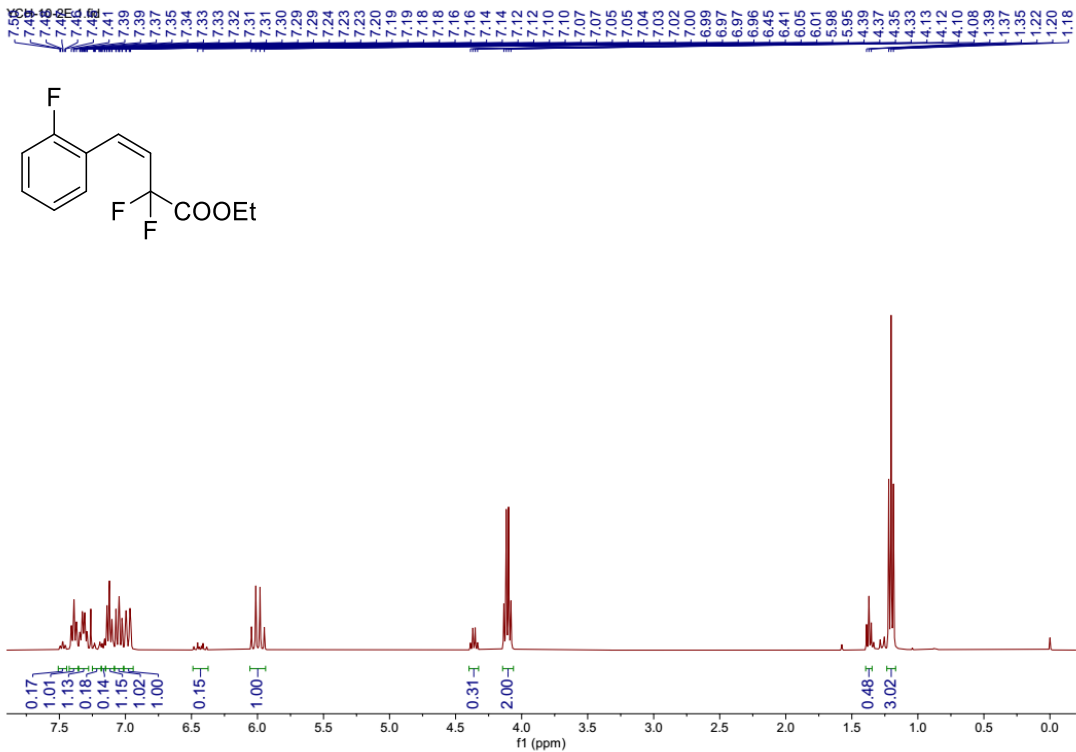

<sup>19</sup>F NMR (376 MHz, Chloroform-*d*) spectrum of compound **55**

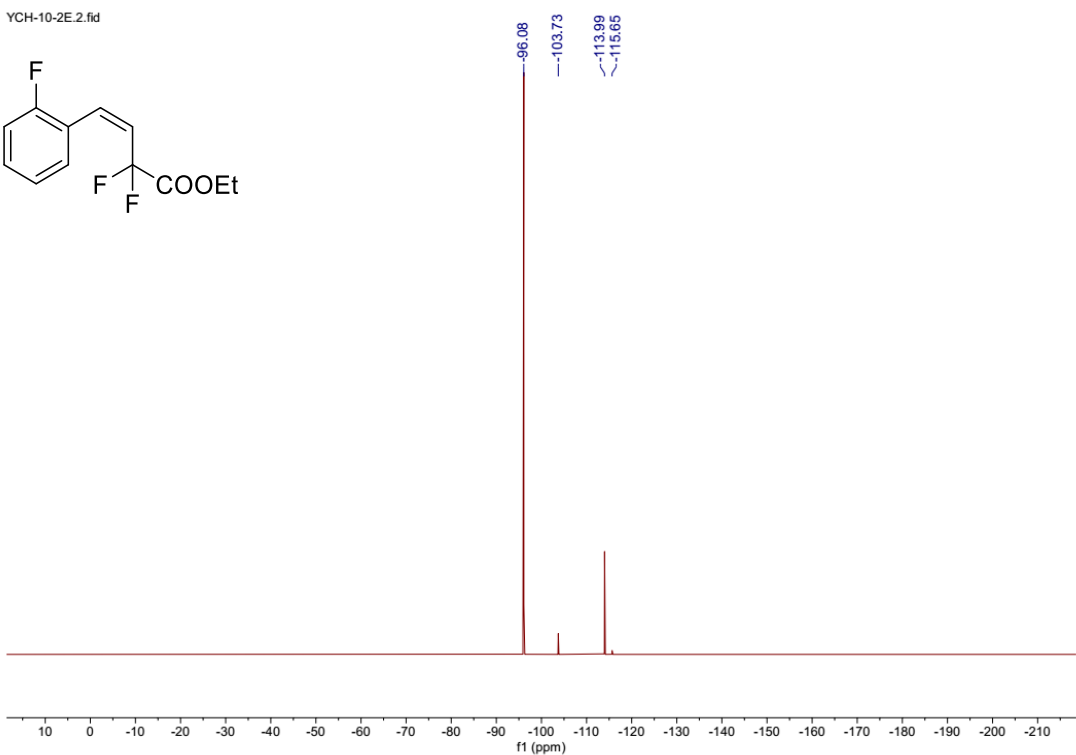

$^{13}\text{C}$  NMR (101 MHz, Chloroform-*d*) spectrum of compound **55**

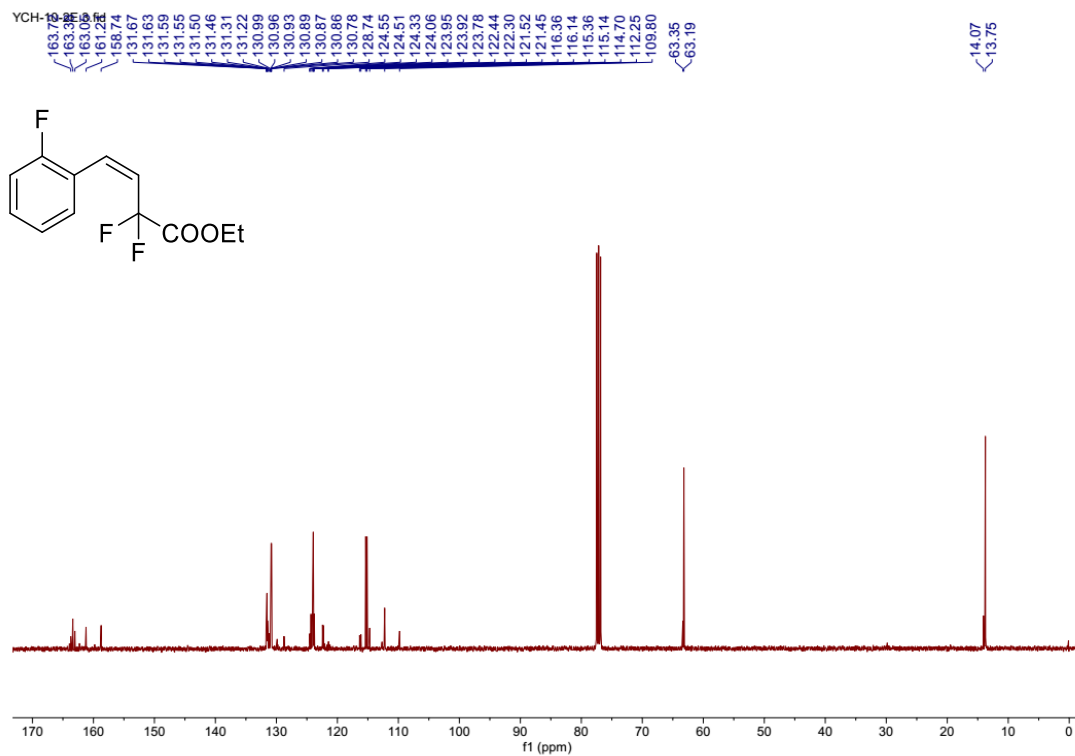

$^1\text{H}$  NMR (400 MHz, CDCl<sub>3</sub>) spectrum of compound **56**

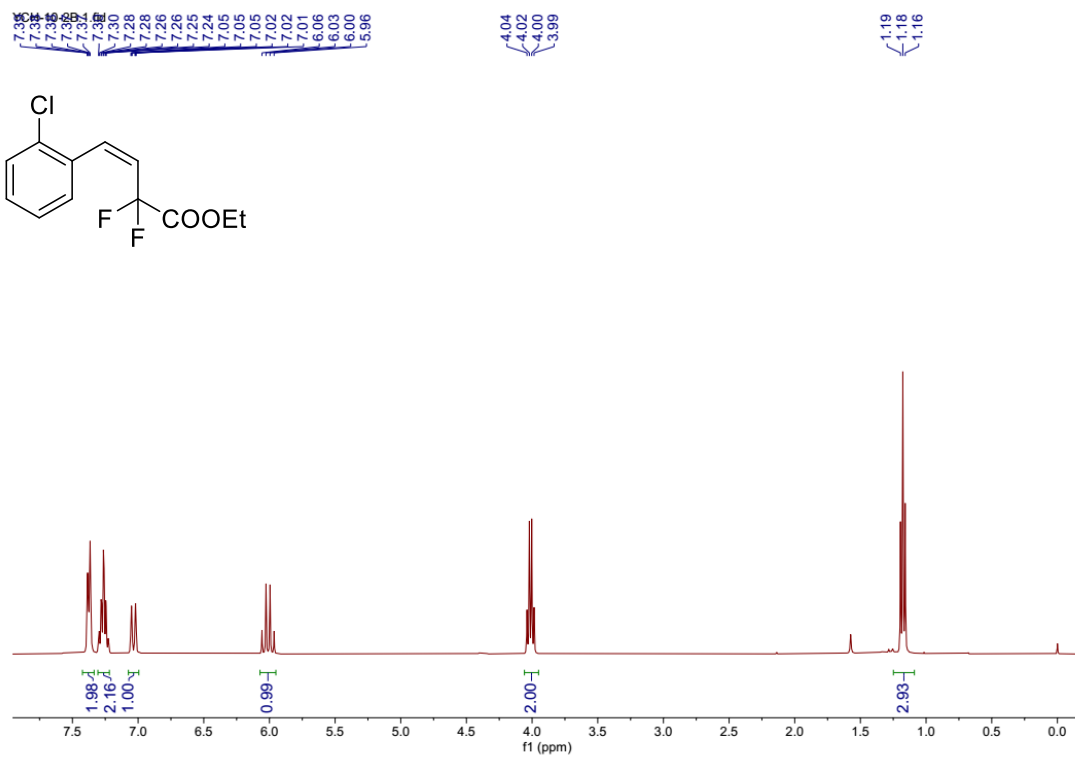

$^{19}\text{F}$  NMR (376 MHz, Chloroform-*d*) spectrum of compound **56**

YCH-10-2B.2.fid

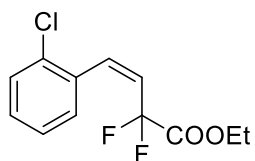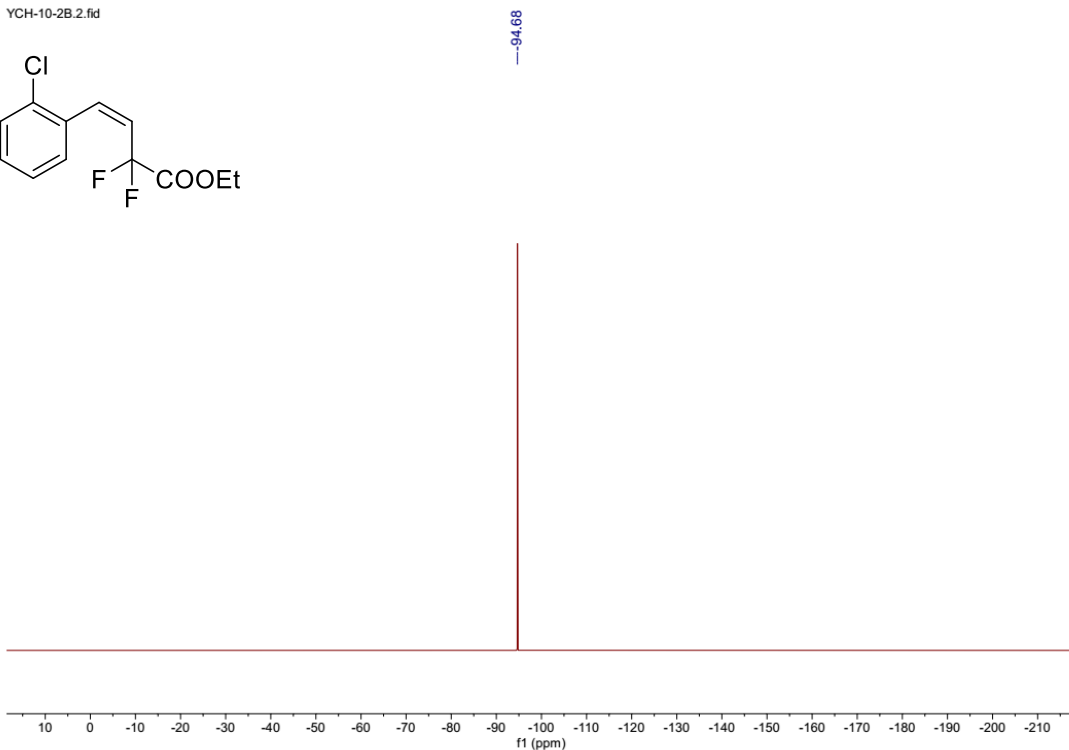

$^{13}\text{C}$  NMR (101 MHz, Chloroform-*d*) spectrum of compound **56**

YCH-10-2B.2.fid

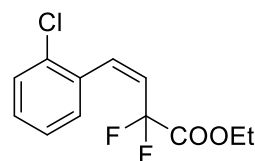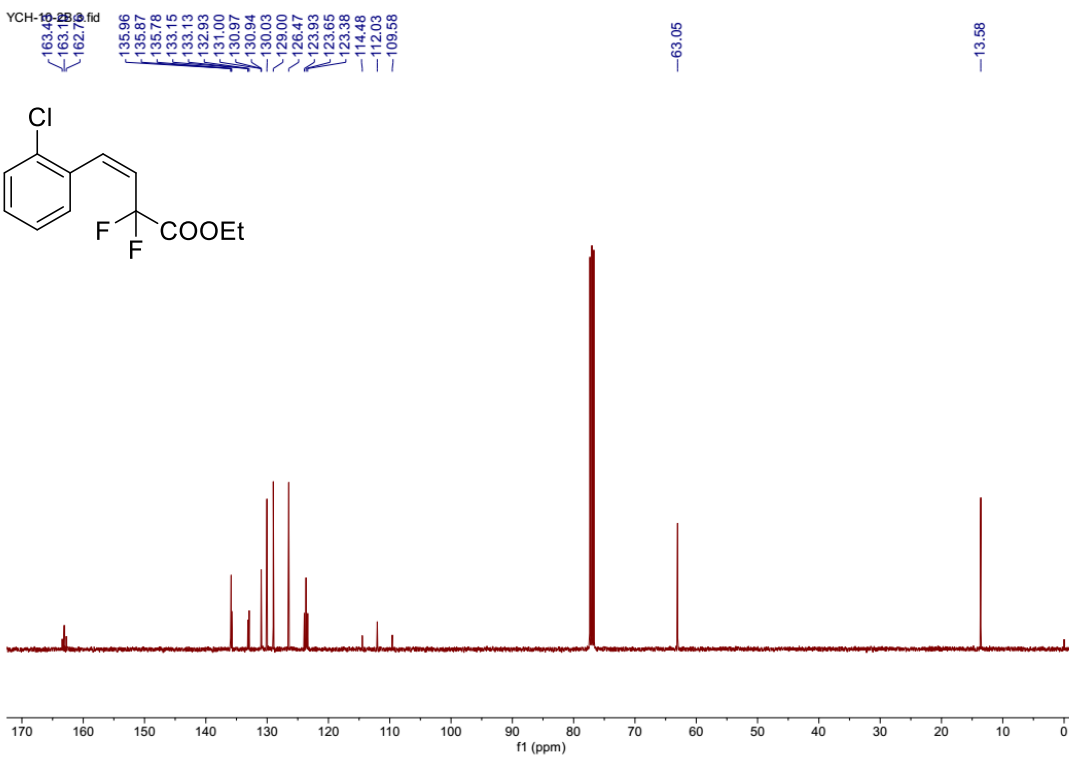

<sup>1</sup>H NMR (400 MHz, CDCl<sub>3</sub>) spectrum of compound **57**

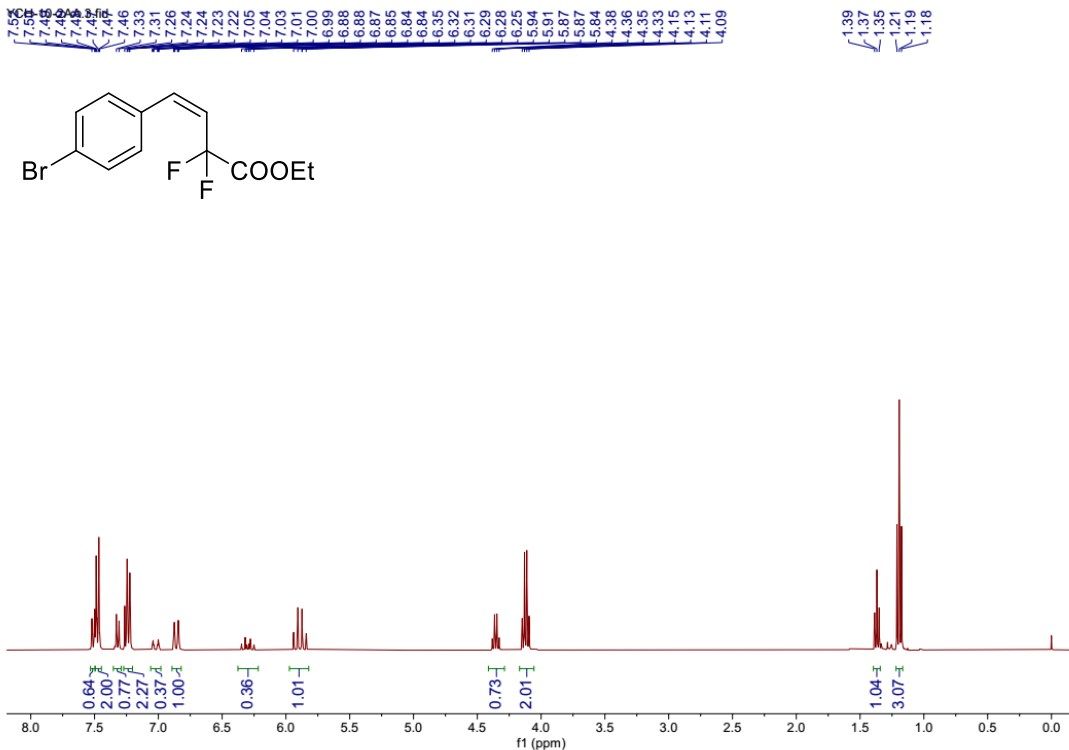

<sup>19</sup>F NMR (376 MHz, Chloroform-*d*) spectrum of compound **57**

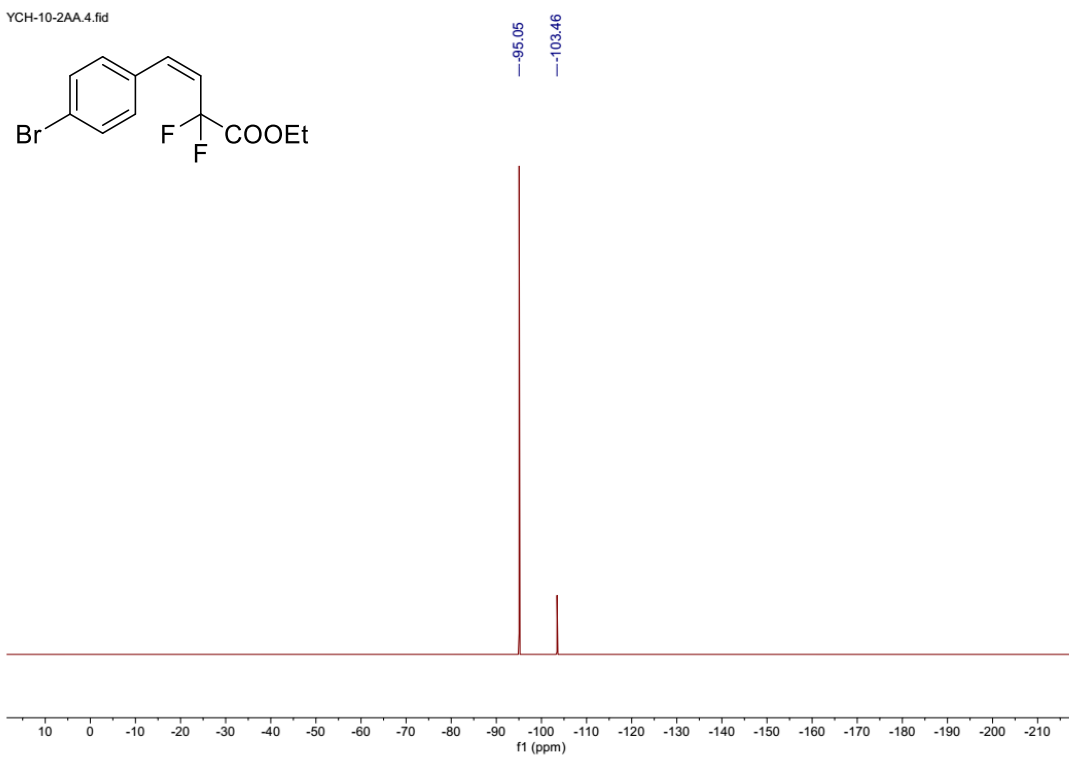

$^{13}\text{C}$  NMR (101 MHz, Chloroform-*d*) spectrum of compound **57**

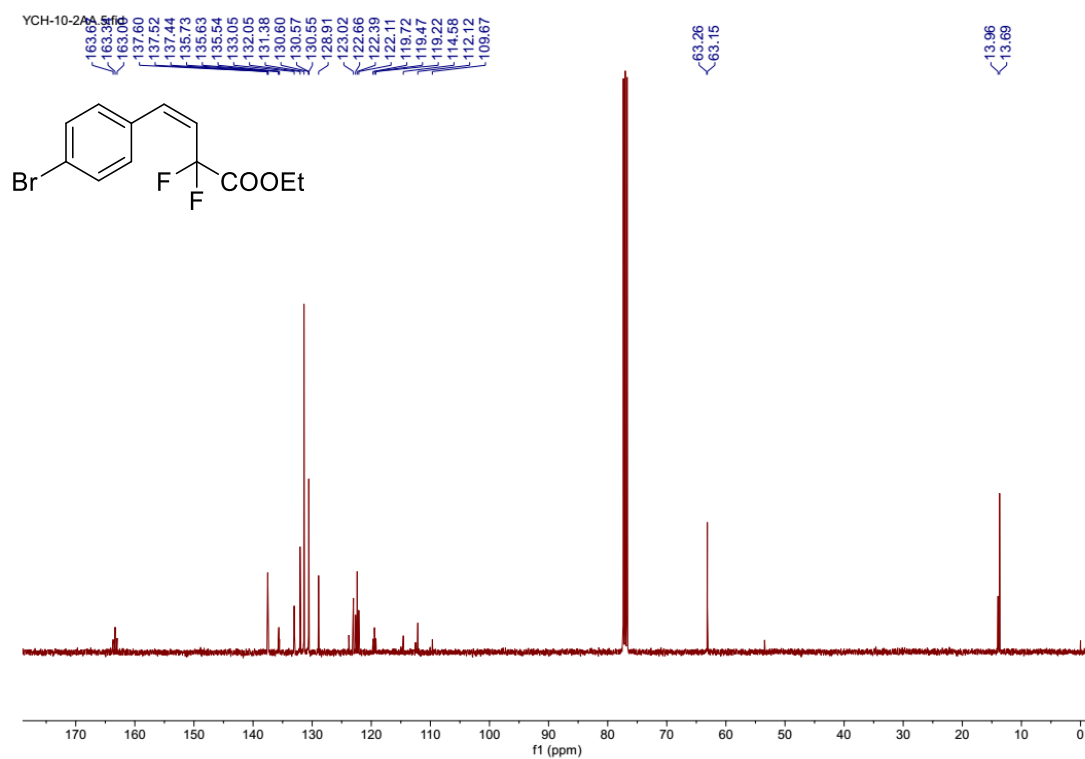

$^1\text{H}$  NMR (400 MHz,  $\text{CDCl}_3$ ) spectrum of compound **58**

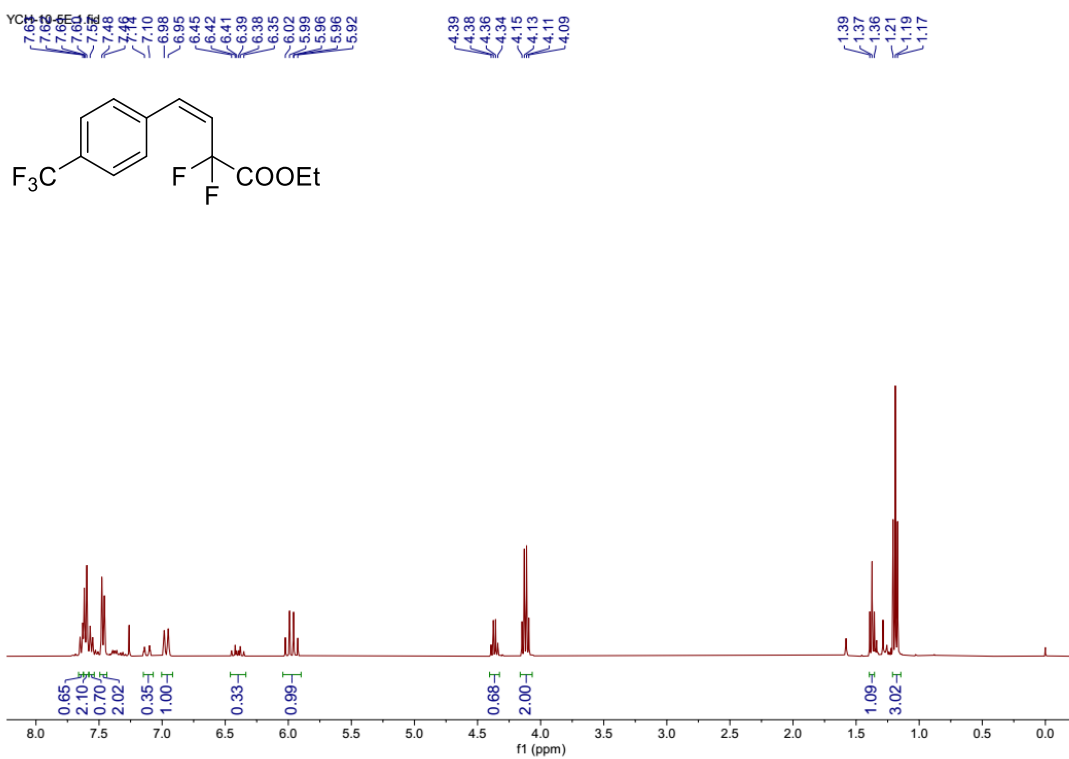

<sup>19</sup>F NMR (376 MHz, Chloroform-*d*) spectrum of compound **58**

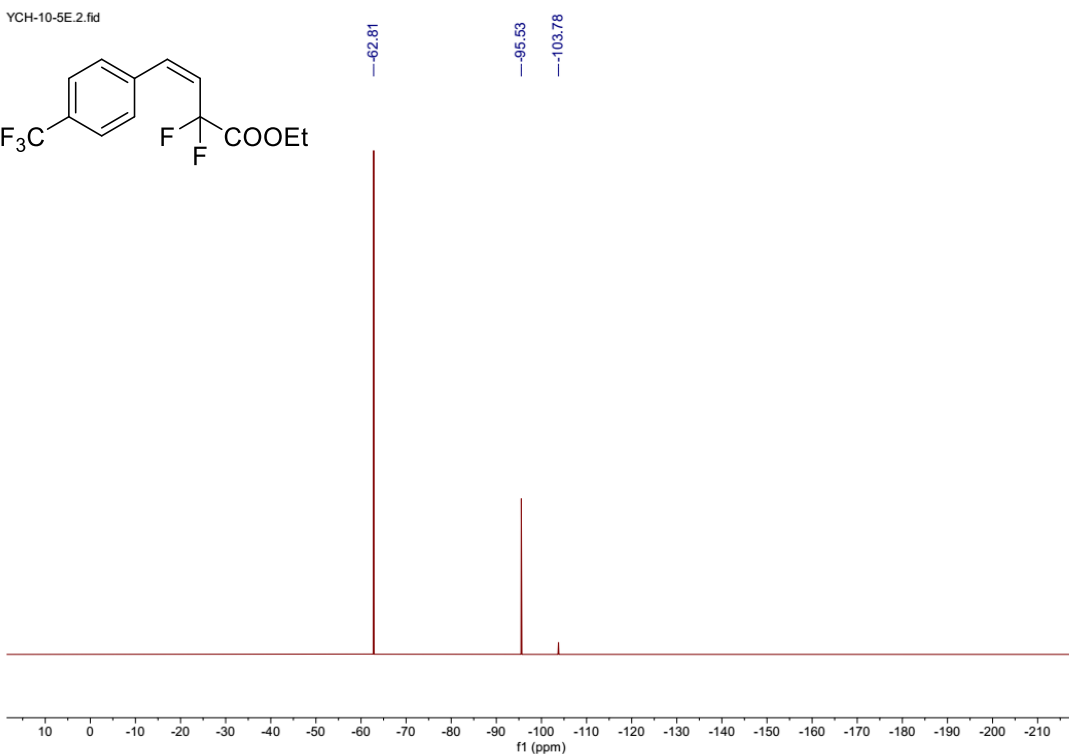

<sup>13</sup>C NMR (101 MHz, Chloroform-*d*) spectrum of compound **58**

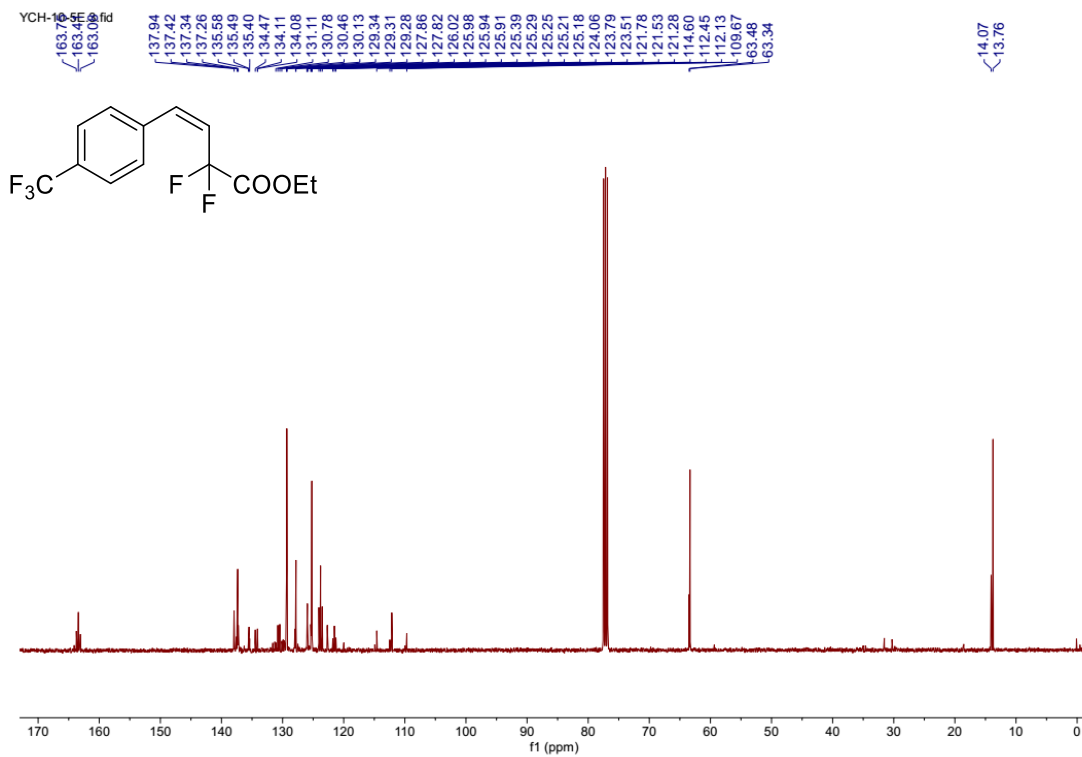

<sup>1</sup>H NMR (400 MHz, CDCl<sub>3</sub>) spectrum of compound **59**

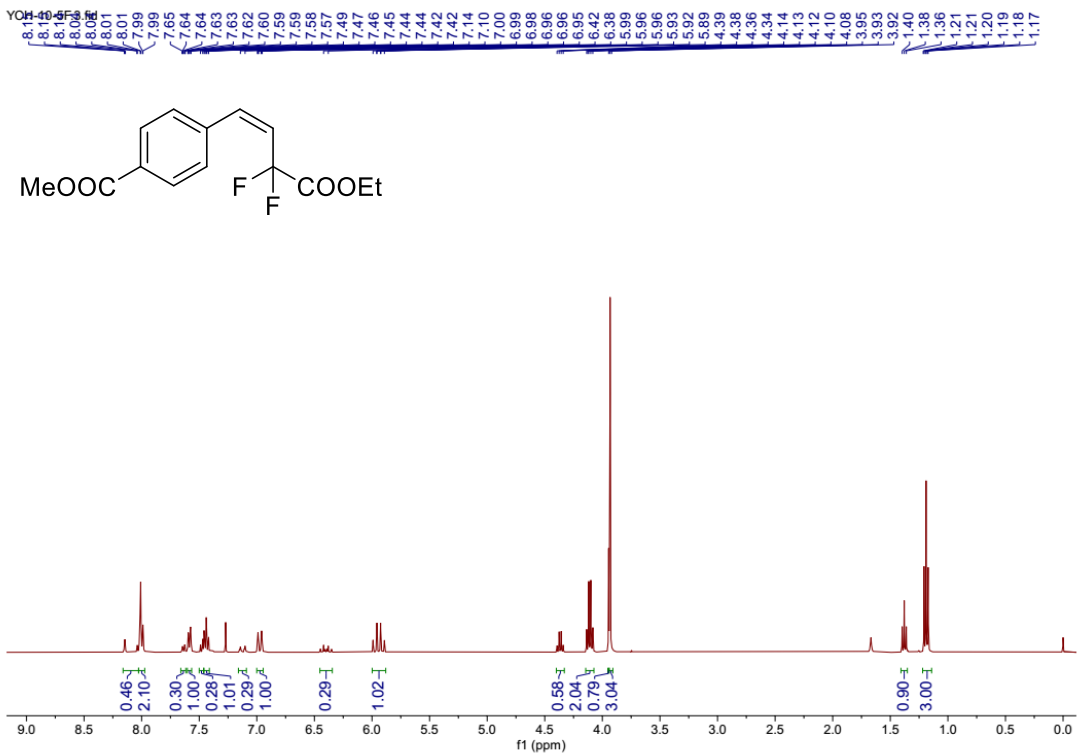

<sup>19</sup>F NMR (376 MHz, Chloroform-*d*) spectrum of compound **59**

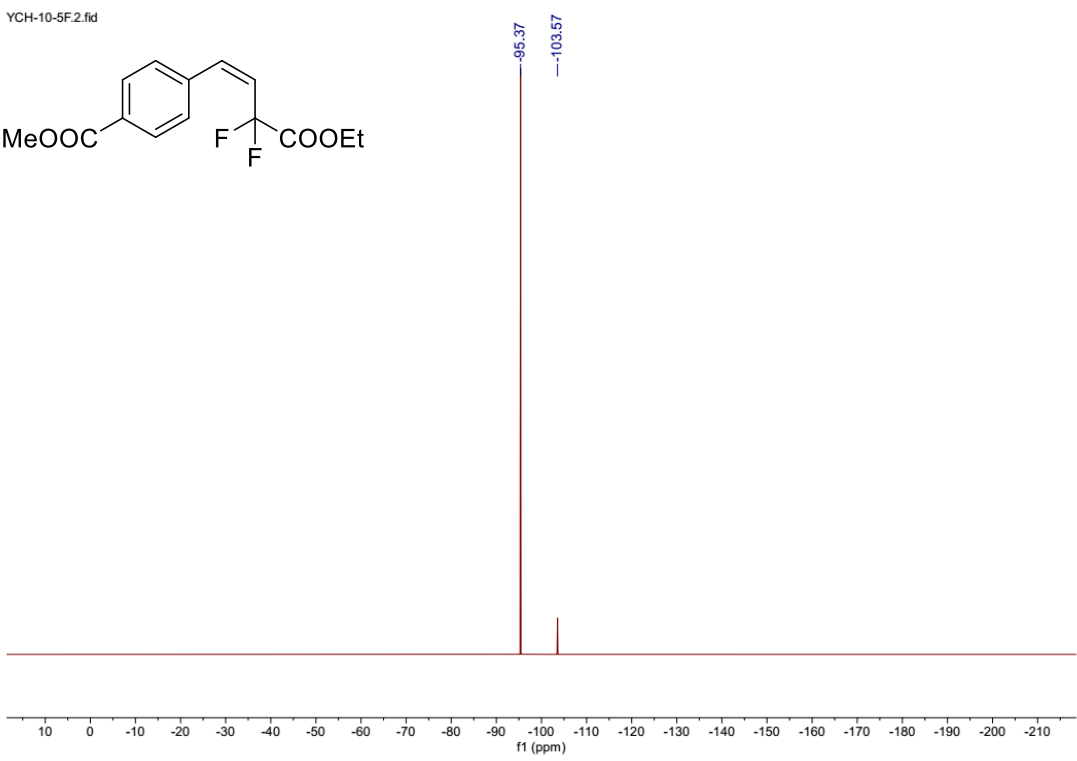



$^{13}\text{C}$  NMR (101 MHz, Chloroform-*d*) spectrum of compound **59**

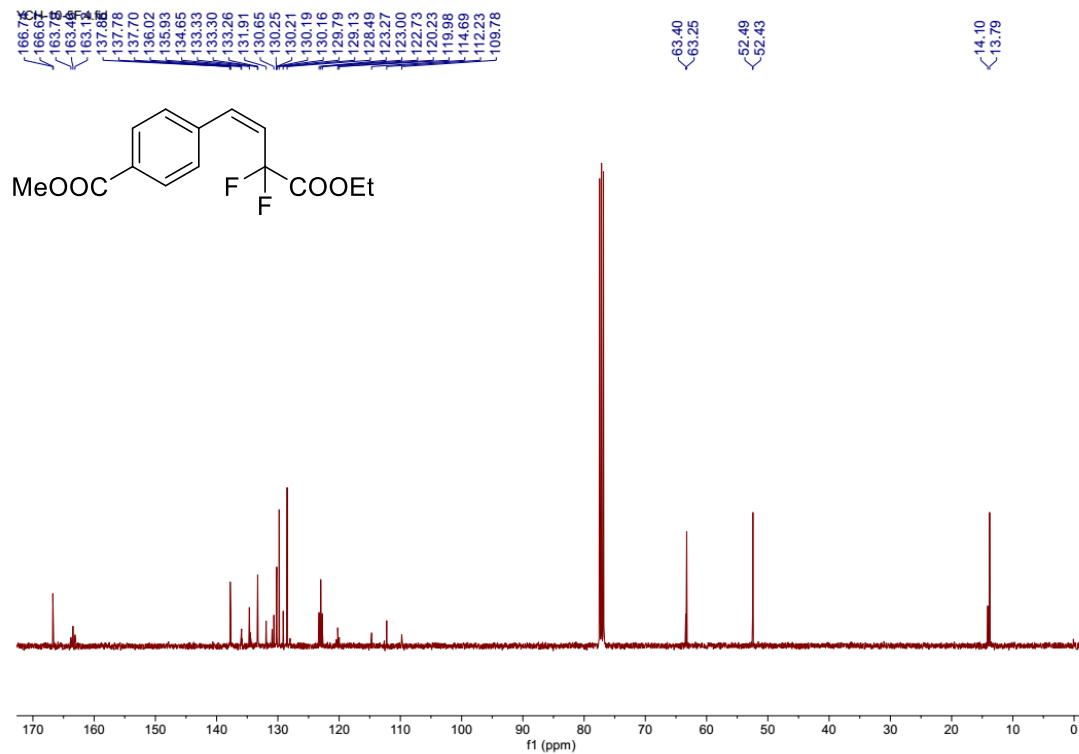

$^1\text{H}$  NMR (400 MHz,  $\text{CDCl}_3$ ) spectrum of compound **60**

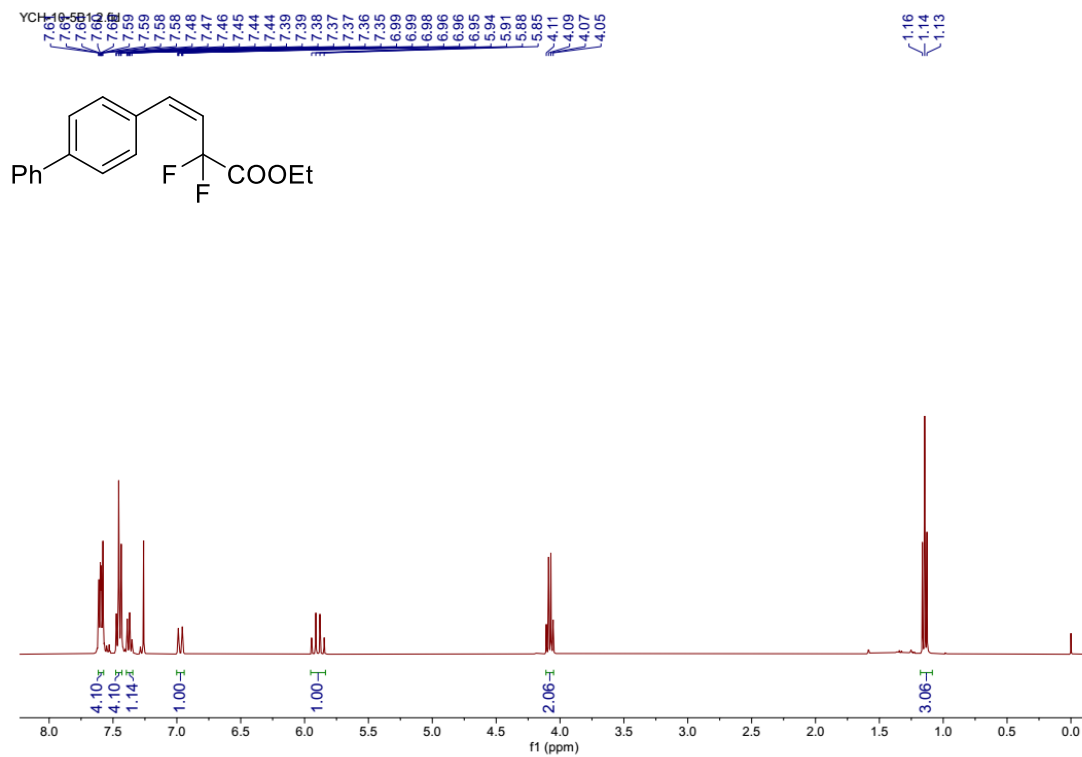

$^{19}\text{F}$  NMR (376 MHz, Chloroform-*d*) spectrum of compound **60**

YCH-10-5B1.3.fid

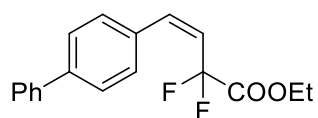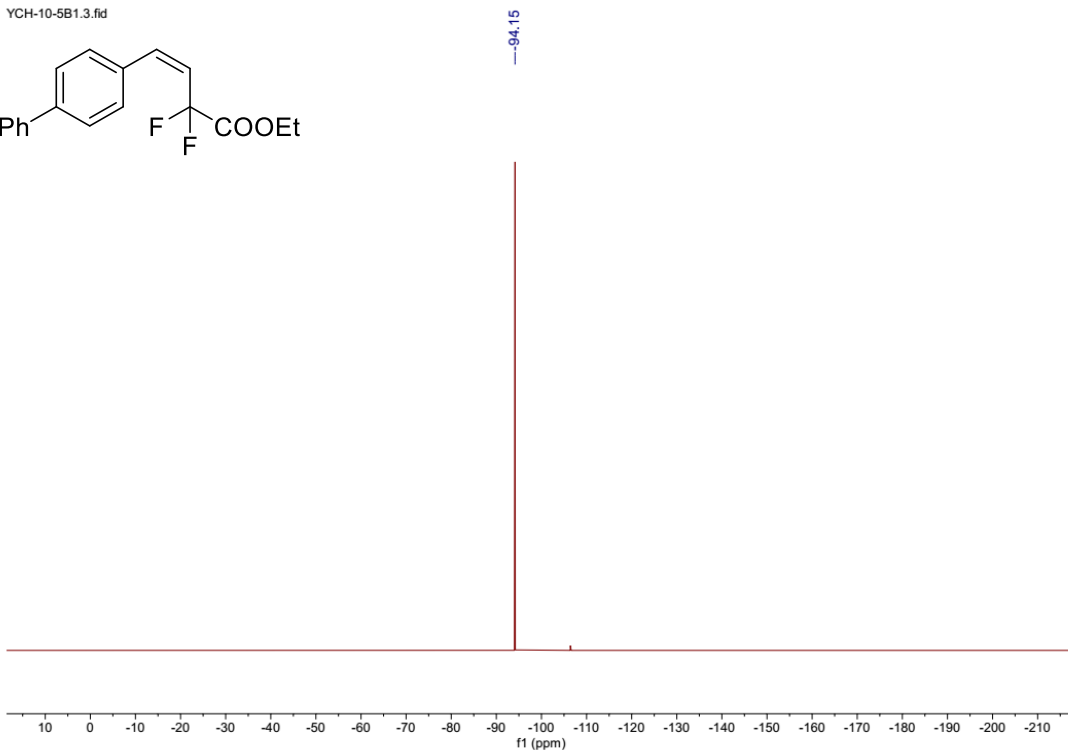

$^{13}\text{C}$  NMR (101 MHz, Chloroform-*d*) spectrum of compound **60**

YCH-10-5B1.1.fid

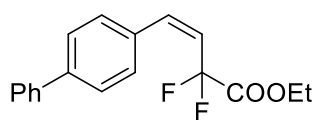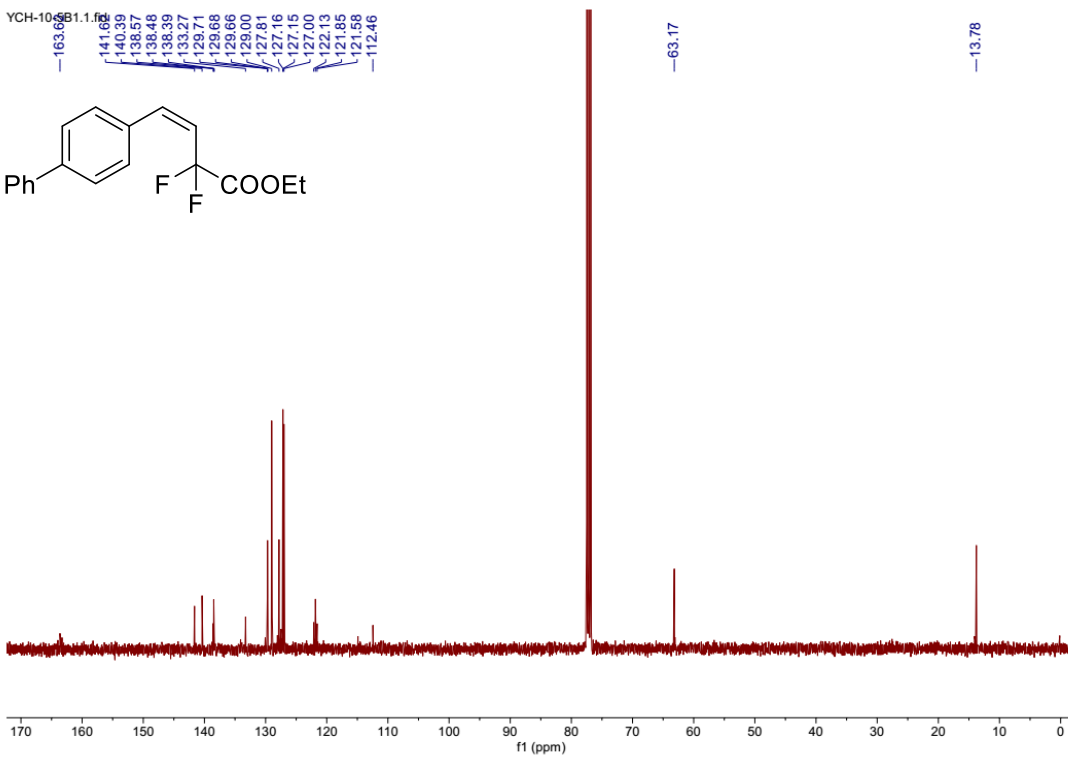

$^1\text{H}$  NMR (400 MHz,  $\text{CDCl}_3$ ) spectrum of compound **61**

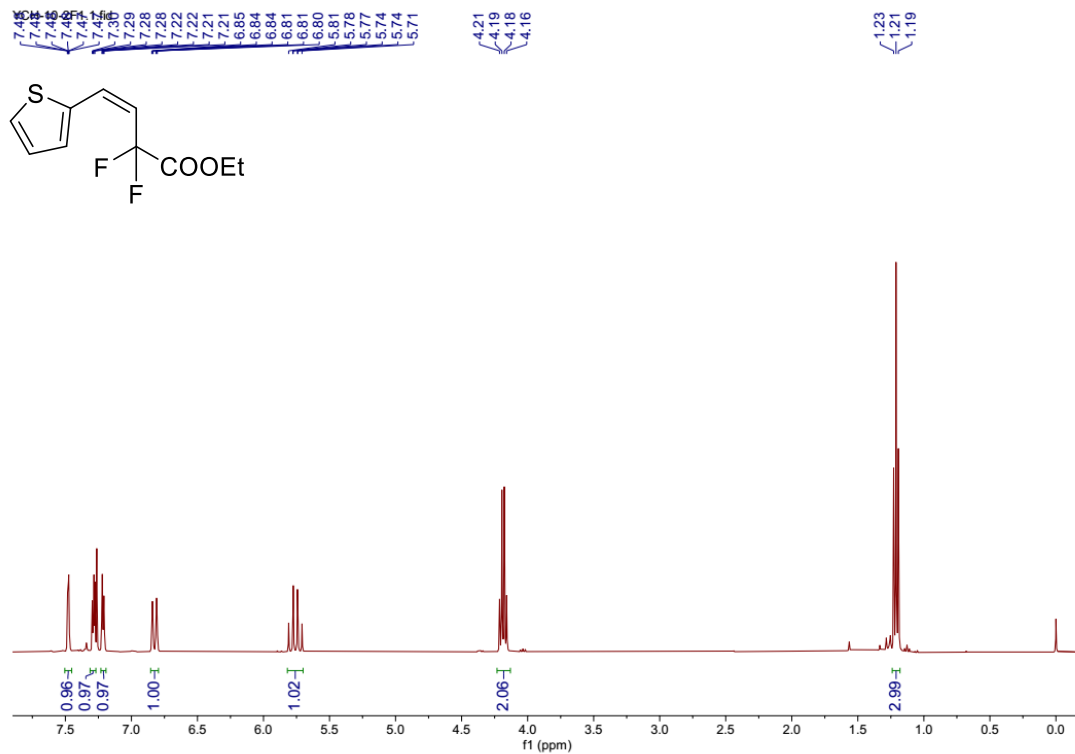

$^{19}\text{F}$  NMR (376 MHz,  $\text{Chloroform-}d$ ) spectrum of compound **61**

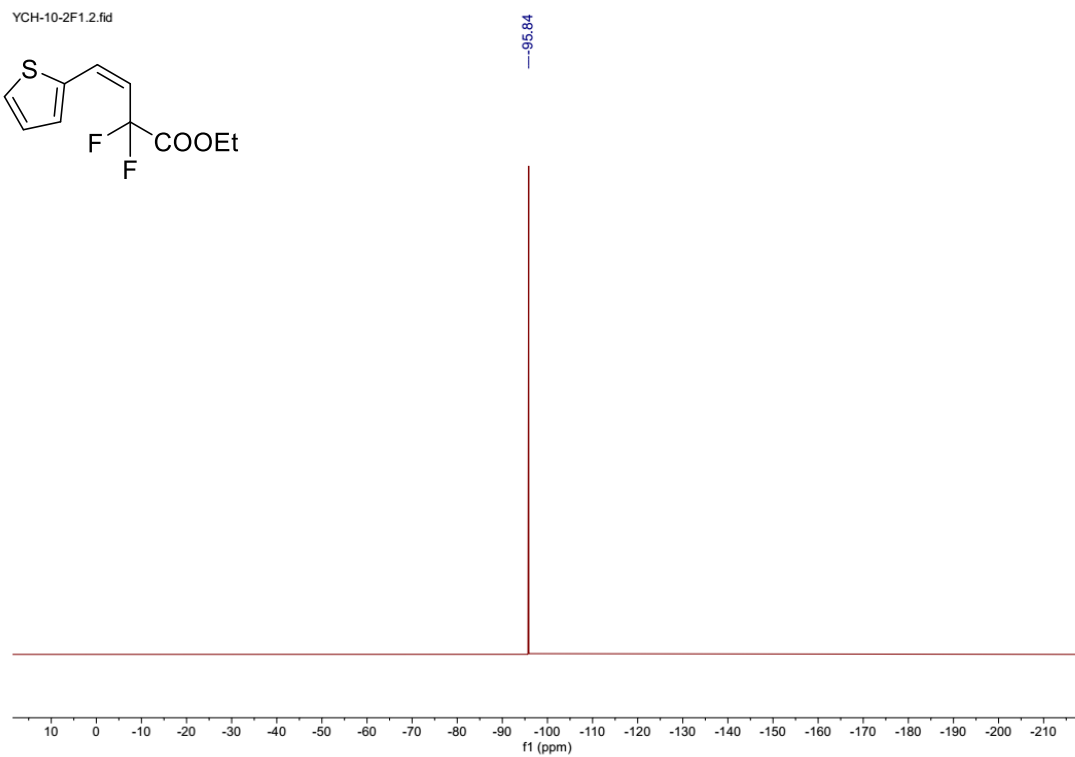



$^1\text{H}$  NMR (400 MHz,  $\text{CDCl}_3$ ) spectrum of compound **71**

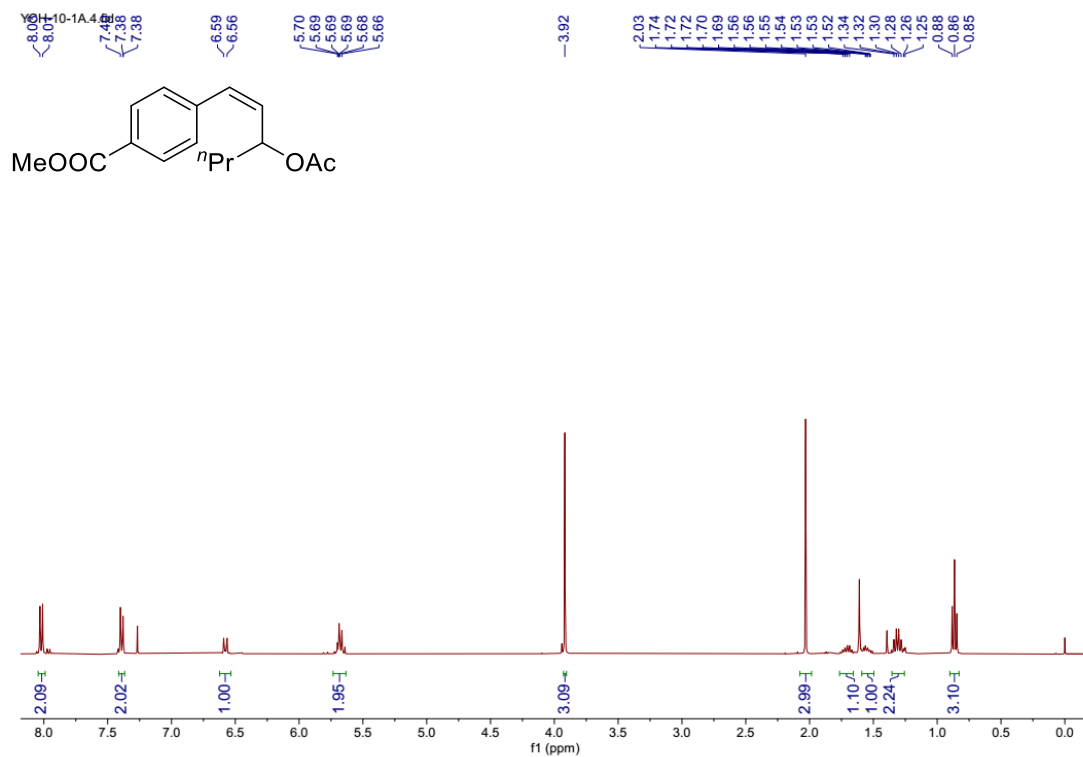

$^{13}\text{C}$  NMR (101 MHz,  $\text{Chloroform-}d$ ) spectrum of compound **71**

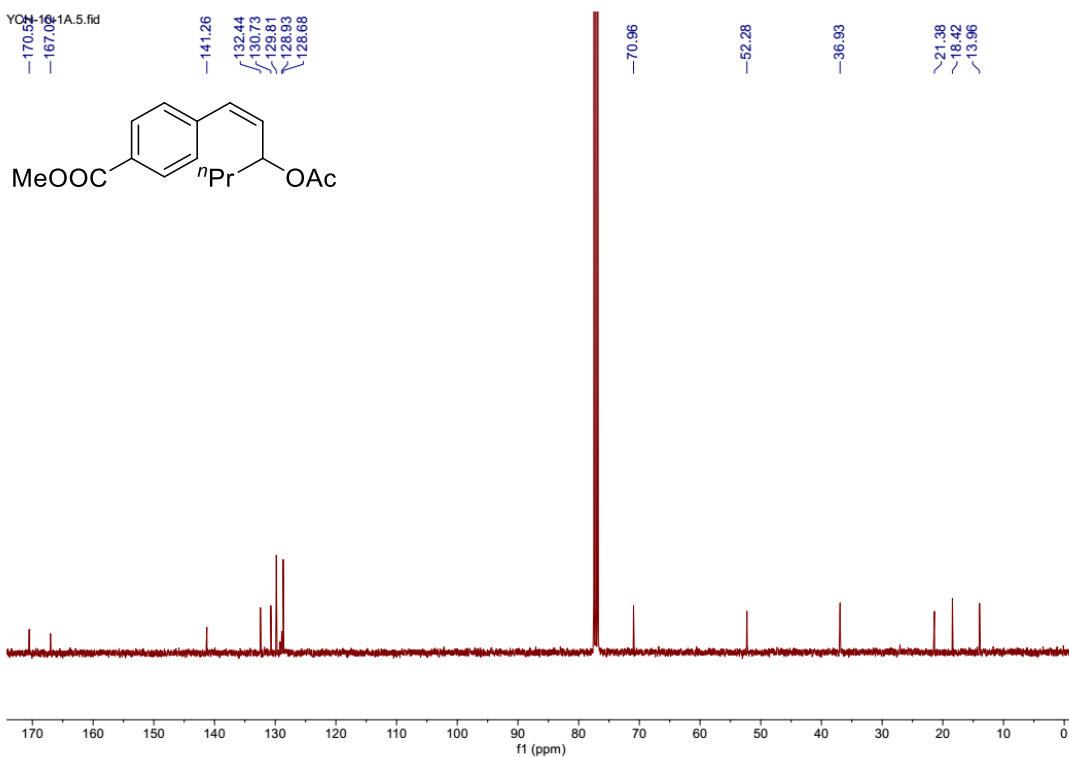

$^1\text{H}$  NMR (400 MHz,  $\text{CDCl}_3$ ) spectrum of compound **73**

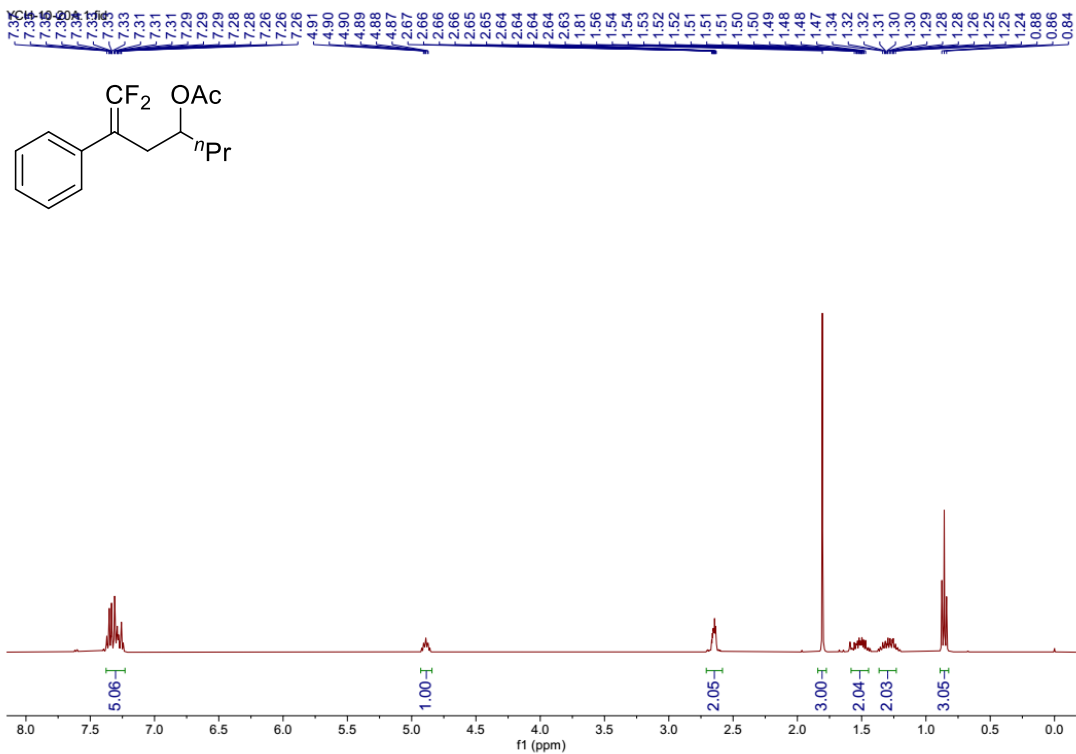

$^{19}\text{F}$  NMR (376 MHz,  $\text{Chloroform-}d$ ) spectrum of compound **63**

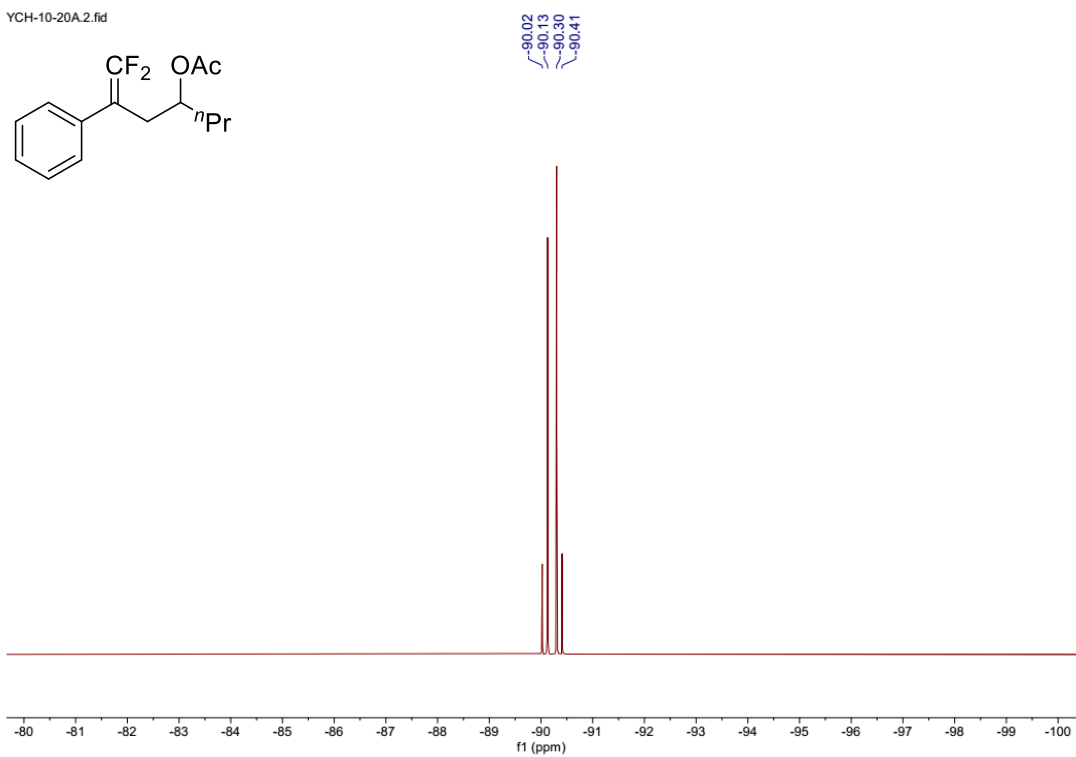

$^{13}\text{C}$  NMR (101 MHz, Chloroform-*d*) spectrum of compound **73**

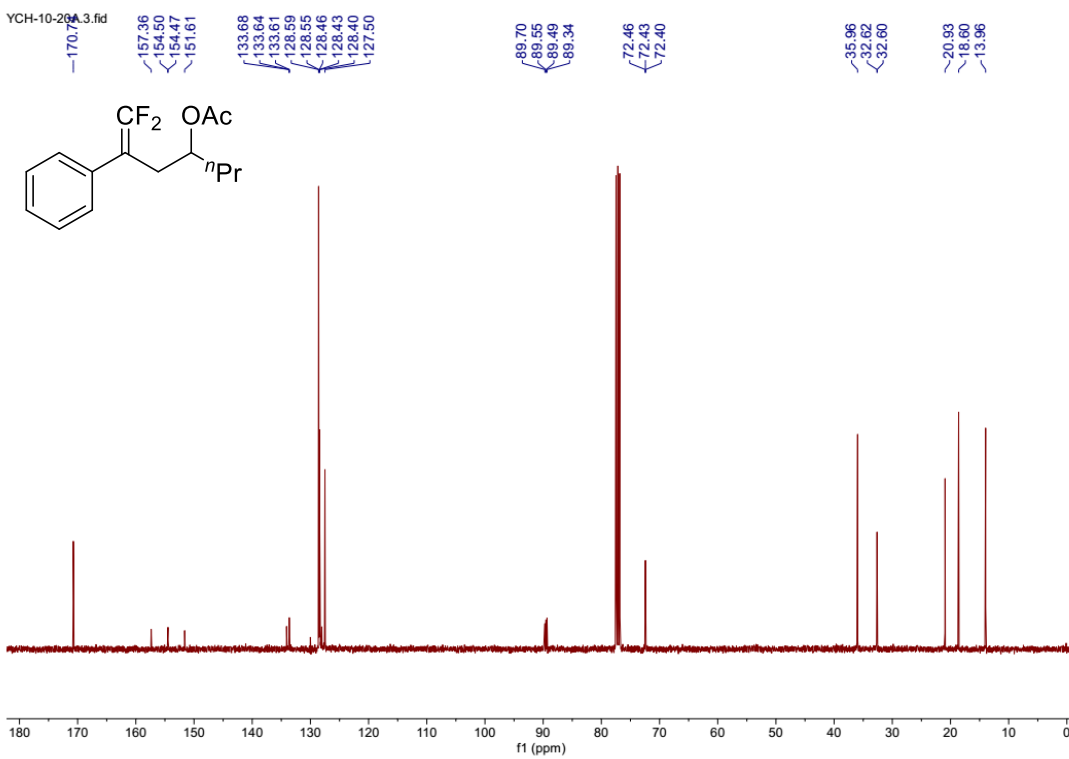

Supplement: d4qo00687a1.pdf [file d4qo00687a1.pdf]
